# Supplementary material for: Heterogeneous polymerase fidelity and mismatch repair bias genome variation and composition
Source: HighWire-hosted journal article supplement (doi:10.1101/gr.178335.114), 2014-09-12
Supplement: Supplemental_Data.docx [file Supplemental_Data.docx]

**Supplemental Figures**

**Figure S1. Workflow of Mutation Accumulation, Whole-Genome Sequencing, and Variant Calling; Related to Experimental Procedures.**

**Figure S2. Mutation Counts Accumulated over 900 Generations; Related to Figure 1.** Accumulated substitution (red) and indel (green) counts for six independent *pol2-M644G mmr-* isolates at six time points, after culling mutations found in the first time point (***t*** =0).

**Figure S3. Variation in Mutation Rates and MMR Correction Efficiencies over Inter-origin Distances and Replication Time; Related to Figure 2..** Mutation rates and MMR efficiency are shown for wild type (black), and three variant polymerase backgrounds: Pol α (red), Pol δ (green), and Pol ε (blue). Color-coded asterisks denote significant non-uniformity of the corresponding curve. (A) Substitution rates with relative inter-origin distance as the independent variable (x-axis; fractional), diagrammed at top (ACS = Autonomously Replicating Sequence Consensus Sequence). (B) As per A, but for insertion and deletion (indel) rates. (C) The portion of the genome in calculating corresponding rates (grey). Pink and blue fields indicate regions used to calculate MMR efficiencies. (D) Substitutions rates, as per A, but with replication time as the independent variable (x-axis; minutes after release from alpha factor arrest). (E) As per D, but for indel rates. (F) Target size per bin, as per C, but over replication time. (G) MMR efficiencies. Background colors correspond to regions indicated in C. P-values are indicated where significant. (H) MMR efficiencies, as per G, but relative to replication time. (I-K) As per A-C, but with absolute inter-origin distance as the independent variable (x-axis; base pairs).

**Figure S4. Polymerase- and Strand -Specificity of Replication Errors Independent of Origin Assignments; Related to Figure 2.** Select polymerase biased complementary mismatch pairs: the fraction of each substitution type, within its complementary pair, as a function of the inverse slope of the replication timing curve (derived from (Muller and Nieduszynski 2012) and (Yabuki et al. 2002)). The inverse slope is used to convert the units to apparent directional replication rate in bp/minute. Negative inverse slopes indicate replication moving rightward from each origin and correspond to the left half of the X-shaped figures in Figure 3B. The reverse is true for positive inverse slopes. This measure shows strand bias independent of origin assignments and of early/late and active/inactive origin designations.

**Table S1. Yeast Strains, Sample Sequencing Details, Filtered Regions, Mapped Features, P-values, and Mutation Lists; Related to Experimental Procedures.**

**SUPPLEMENTAL METHODS**

***Yeast strains and methods.*** All sequenced *S. cerevisiae* strains are diploids descended from Δ|(-2)|-7B-YUNI300 (Pavlov et al. 2001). All are homozygous for the following genotypic markers: *CAN1, his7-2, leu2-Δ::kanMX, ura3-Δ::, trp1-289, ade2-1, lys2-ΔGG2899-2900*, and *agp1::URA3* (orientations vary between strains; Table S1). All diploids were created by back-crossing *MATa* and *MATα* haploid spores from fresh meiotic tetrad dissections (Fig. S1). Homozygosity of desired mutator polymerase alleles, where applicable, was confirmed via Sanger sequencing. Homozygosity of *MSH2* (or *MSH3* and *MSH6*) knockouts, where applicable, was confirmed via PCR fragment size analysis.

***Mutation accumulation.*** As per Figure S1, yeast cells were subjected to up to 30 bottleneck passages by streaking each strain for single cell-derived colonies on complete solid media enriched with adenine. After bottlenecks 0, 1, 4, 10, 16, 22, and 30, each sample was split into three parts: one part was used to inoculate a 1 mL overnight culture and then a freezer stock; one part was re-streaked to initiate the next passage; the last inoculated a patch on solid media, which was replicated on selective media to test for all marker genes, mating type (as a proxy for ploidy), and ability to metabolize glycerol. Accumulation was stopped no later than passage 30, or earlier if most colonies in the streak were < 1 mm in diameter after 72 hours. Small colonies imply slow growth and/or low survival rates, both of which could introduce selective pressure and/or skew generation estimates and thus mutation rate calculations.

***Genomic DNA preparation.*** Cells were harvested from 10 mL cultures. Genomic DNA was isolated via the Epicentre MasterPure Yeast DNA Purification Kit (MPY80200), including RNase A treatment.

***Library preparation and genome sequencing.*** The DNA libraries were prepared according to Illumina TruSeqTM DNA Sample Prep protocol. Total cellular DNA was fragmented to sizes between 200 and 800 bp by using Covaris S2 sonicator according to the Illumina TruSeq DNA protocol and then libraries were prepared using Illumina TruSeqTM DNA Sample Prep Kit on Tecan Freedom EVO 150 Automated Liquid Handling System. Libraries were size selected for insert fragments around 300 base pairs using Pippin Prep automatic DNA size selection system (Sage Science). Libraries were analyzed and quantified using a Qubit (fluorometric detection – Invitrogen) and Experion automated electrophoresis system (Biorad). Quantified libraries were diluted to 15 nM concentration and pooled for sequencing. The Paired-End sequencing (2 × 100 cycles) was performed on HiSeq 2000 sequencers (Illumina).

***Reference assembly and genomic feature selection.*** Assembly of the master reference sequence, L03, was described previously (Larrea et al. 2010). That reference has since been reassembled from data with greater depth, but sequence changes were minimal and mostly in repeat regions not used in this study. The L03 reference sequences may be found as supplemental files at the NCBI Gene Expression Omnibus (GEO; <http://www.ncbi.nlm.nih.gov/geo/>) under accession number GSE56939. Sixteen feature types were mapped to the reference genome. Of these, five types were used in this study: genes (*N*=6,157), retrotransposon long terminal repeats (LTRs; 381), repeat regions (192), replication origins (394), and nucleosome binding sites (60,098). Annotations for the first three were acquired from the Saccharomyces Genome Database S288c genome version R64-1-1 (Engel et al. 2014) and mapped onto L03. LTRs, repeat regions, and a small set of paralogous genes (*N*=21) were excluded from further analysis (see below and Table S1). Nucleosomes binding positions were acquired via MNase-Seq (see below). Replication origins were defined by 13 bp Autonomously Replicating Sequence (ARS) Consensus Sequences (ACSs) mapped within confirmed functional origins of replication (derived from the *S. cerevisiae* OriDB Version 2.1.0 (Siow et al. 2012); Table S1).

***Calling variant base pairs from Illumina sequences.*** Sequencing reads were mapped to the updated version of the L03 master reference sequence using CLC bio Genomics Workbench version 5.1.5 with parameters set as per Fig. S1, left panel, step 4. Coverage variation was used to check sequences for aneuploidy. Variant base pairs were called with parameter settings as per Fig. S1, left panel, step 6. Note that less stringent parameters were used for passage 0 (pre-accumulation) samples. Variants from later passages were filtered (Fig. S1) using a custom Excel tool and kept for further analysis only if they were not called in the relevant passage 0 ancestor, the local sequence coverage was at least 20-fold, did not fall within an "excluded feature" (Fig. 1A, panel marked ‡), and was present within 10% of the expected allelic fraction. Variants were pooled by initial genotype for all mutation rate calculations.

Excluded features represent 4.7% of the genome (outside of the rDNA loci; see Table S1). We do not quote a genome fraction in the text because they overlap with regions that are annotated but which we cannot uniquely map (telomeres, transposons, LTRs, other repeat regions; 4.3% of the genome). The remainder are paralogous gene families found to give very high false positive rates. They include the *FLO*, *CCT*, *ROM*, *PFK*, and *YCK* genes and represent 0.4% of the genome.

***Finding nucleosome locations via MNase-seq.*** MNase-digested Illumina paired end reads were filtered for quality, excluding reads with mean scores below Q20 and aligned to an L03 master reference sequence using Bowtie 0.12.7 (Langmead et al. 2009) allowing two mismatches and maintaining only unique alignments (-m1 -v2 -X1000). Mono-nucleosome sized fragments with length ≥ 120 bp and ≤ 180 bp were examined to determine nucleosome positioning using NOrMAL (Polishko et al. 2012) using maximum allowed nucleosome size (s_max) 200, maximum allowed overlap (v_d) 0.1, and maximum allowed variation (v_max) 30 otherwise under default parameters.

***Calculating overall genomic mutation rates.*** Each mutation rate, per base pair per generation, *µbp,i*, for any mutation type, *i*, in any section of the genome (bin, *b*), are calculated as

where *Ni,b* is the number of mutations of type *i* in bin *b* (all isolates of the selected genotype, terminal passages only), *Nbp,b­* is the number of base pairs in bin *b*, accounting for ploidy, and *gentot* is the total number of generations of mutation accumulation for all isolates of the selected genotype.

*Nbp,b­* is estimated in a number of ways. For instance, for the overall per base per generation mutation rate across the diploid *S. cerevisiae* genome, all mapped base pairs are included in *b*. Thus *Nbp,2n genome* is twice the number of base pairs mapped in the L03 reference genome, or approximately 23,048,000. For each type of substitution and single-base deletion (Table 1), *Nbp,b­* is corrected for target size based on the GC percentage of the genome. For example, AT to TA transversions cannot occur at GC base pairs, so *b* includes all AT base pairs and *Nbp,2n A+T* is approximately 14,289,760 (23,048,000 x 62% A+T).

***Calculating mutation rates and MMR correction efficiencies relative to genomic landmarks.*** *Nbp,b­* estimation relative to genomic landmarks can be more complicated. For *µbp,i* relative to physical genomic features, *b* was assigned by measuring from one of four possible points, represented as zero on the horizontal axis.

1. The feature itself is excluded: the abscissa represents the absolute (non-directional) distance from the nearest terminus of the chosen feature type. The graphs in Figure 2B and Figure S3A-B were calculated in this way, with units of *relative* distance between adjacent replication origins (defined by autonomously replicating sequence (ARS) consensus sequences (ACS)).
2. The abscissa represents the absolute (non-directional) distance, in base pairs (bp), from the nearest midpoint position of the chosen feature type. Thus in Figure S3I-K distances are measured from ACS midpoints and in Figure 4A distances are measured from nucleosome midpoints (dyads).

These measures are appropriate for features that are roughly symmetrical at the resolution shown. For clearly asymmetrical features:

1. The feature itself is included: the abscissa represents directional distance, in base pairs (bp), from the nearest terminus of the chosen feature type and data points outside of the chosen feature type are excluded if they are closer to the end of one feature than to the beginning of another. The sign of the distance is reversed if the end of the feature is encoded right-to-left. This ensures that all data to the left of the origin (negative distances) are outside of the chosen feature and all data to the right of the origin (positive distances) are inside. *Nbp,b­* is determined by counting the number of base pairs in the genome that satisfy these conditions within and given distance bin. This method was used for the distances represented in Figure 5 and the left panels in Figure 4B, measuring from the start positions of annotated genes.
2. As per method (3), except that data points outside of the chosen feature type are excluded if they are closer to the beginning of one feature than to the of end another. This ensures that all data to the left of the origin are inside of the chosen feature and all data to the right of the origin are outside. This method was used for the distances represented in the right panels in Figure 4B, measuring from the end positions of annotated genes.

The MMR correction efficiency, *cf*, for a given mutation type *i* in genomic bin *b*, is the ratio of the MMR-deficient and MMR-proficient mutation rates where all else is genetically equal:

***Calculating mutation rates relative to replication time.*** Replication times for each 1 kb section of the genome were estimated by converting published relative copy number maps (Muller and Nieduszynski 2012) into replication timing units. Briefly, Muller et al. sorted S and G2 phase cells from asynchronous diploid S. cerevisiae cultures and used quantitative deep sequencing to measure the relative copy number of each genomic stretch. The first sequences replicated in S phase had relative copy numbers twice as high as the last sequences replicated in S phase. Since they showed that the relative copy number is proportional to the mean replication time, we used published origin firing times (measured in minutes after release from α-factor induced G1 growth arrest (Yabuki et al. 2002)) to transform the data from relative copy number into replication time. Relative copy number correlated linearly with published microarray-based origin firing times (R2 = 0.68). A recent study found a higher and not-quite-linear correlation (Muller et al. 2014). The timing estimates in that study were shifted later. For the purposes of this study, the Yabuki *et al.* times are used, but the Muller *et al.* times may be estimated by the simple expedient of adding roughly 14 minutes. The genome was divided into twenty bins by replication time (between 17 and 33 minutes after release from mating pheromone (alpha factor) arrest). Mutations (*Ni,b*) and base pairs (*Nbp,b­*) were counted and mutation rates (*µbp,*) were determined for each bin. This method yielded estimated replication times used in Figure S3D-F and Figure S4.

***Determining the magnitude of selective pressure.*** Synonymous (Ks) and non-synonymous (Ka) mutation rates were compared in order to estimate possible effects of selective pressure. Ka/Ks ratios lower than one indicate purifying selection, and ratios higher than one indicate positive selection. The L03 master reference has 3.02 million mapped codons, allowing about 27 million possible substitutions, 5.76 million of which would be synonymous. Synonymous and non-synonymous substitutions of each type were counted for each strain and the mutation rates calculated. The Ka/Ks estimates for mmr- strains with mutator polymerase alleles range from 0.59 to 0.76, suggesting purifying selection, but these ignore systematic biases in mutation rates (i.e. transitions are more frequent than transversions, etc.). Mean Ka/Ks ratios, calculated from each substitution type with at least 100 instances per strain, range from 1.03 to 1.07. Alternatively, weighted averages of Ka/Ks ratios from all substitution types range from 1.11 to 1.15. Each ratio exceeds 1, but never by more than one standard deviation, so we conclude that there are no significant selective pressures during our experiment.

***Mutable motif detection.*** Initial motif detection was accomplished with a custom Excel tool that culled mutation lists for only those that occurred near origins of replication. Fractional inter-origin distance of 0.05-0.2 (in order to get as close to 100 sequences as possible for each mutation type for each genotype) were used to enrich the list with sequences that had template mismatches on the presumed strand (Figure 2A). Twenty bases bracketing each variant were oriented such that all presumed template strands were aligned, with the same polarity. The custom Excel tool generated initial hidden Markov, log-likelihood models for initial motif detection. Once interesting motifs were found, sequence logos were created by submitting the sequence lists to the WebLogo 3 website (weblogo.threeplusone.com; (Schneider and Stephens 1990; Crooks et al. 2004)).

***Hypothesis testing.*** Several statistical methods were used for hypothesis testing, depending on sample sizes and the character of the questions asked:

- To detect non-uniformity of polymerase fidelity, chi-squared tests were used to compare observed mutation counts from MMR-deficient strains to expected counts derived from the distribution of target bases in each genomic bin (10-20 bins; null hypothesis (*H0­*) = mutation rates in MMR-deficient strains are evenly distributed with respect to the genomic feature of interest). In Fig. S3A-B,D-E,I-J, asterisks denote significant non-uniformity (rejection of the null). In Fig. 4, all curves were significantly non-uniform.
- To detect regional MMR excesses or deficiencies, chi-squared tests were used to compare observed mutation counts from MMR-proficient strains to expected counts derived from the mutation distributions of corresponding MMR-deficient strains (2 bins; *H0­* = MMR efficiency does not vary with respect to the genomic feature of interest). In Figs. S3G-H, asterisks denote significant deviation from underlying mutation rates.
- To detect regional polymerase substitution fidelity excesses or deficiencies, exact binomial tests were used to compare mutation counts between regions of interest, with the lower count as the observed value and the larger count, rescaled based on target size per bin, as the expected count (2 bins; *H0* = mutation rates in MMR-deficient strains are proportionally distributed with respect to the target size of the regions of interest). In Fig. 4, asterisks above brackets denote significant regional fidelity differences. Fidelity deviations with respect to origin proximity and replication time are discussed in the text.

Bonferroni and Dunn–Šidák (Dunn 1961; Šidák 1967) correction both set the maximum p-value for null hypothesis rejection to ≥ 0.0056-0.0057 for strains with wild type polymerases (N = 9, α = 0.05) and ≥ 0.0022 for strains with variant polymerases (N = 23, α = 0.05).

**REFERENCES**

Crooks, G.E., Hon, G., Chandonia, J.M., and Brenner, S.E. 2004. WebLogo: a sequence logo generator. *Genome Res* **14**(6): 1188-1190.

Dunn, O.J. 1961. Multiple Comparisons among Means. *Journal of the American Statistical Association* **56**(293): 52-&.

Engel, S.R., Dietrich, F.S., Fisk, D.G., Binkley, G., Balakrishnan, R., Costanzo, M.C., Dwight, S.S., Hitz, B.C., Karra, K., Nash, R.S. et al. 2014. The reference genome sequence of Saccharomyces cerevisiae: then and now. *G3 (Bethesda)* **4**(3): 389-398.

Langmead, B., Trapnell, C., Pop, M., and Salzberg, S.L. 2009. Ultrafast and memory-efficient alignment of short DNA sequences to the human genome. *Genome Biol* **10**(3): R25.

Larrea, A.A., Lujan, S.A., Nick McElhinny, S.A., Mieczkowski, P.A., Resnick, M.A., Gordenin, D.A., and Kunkel, T.A. 2010. Genome-wide model for the normal eukaryotic DNA replication fork. *Proc Natl Acad Sci U S A* **107**(41): 17674-17679.

Muller, C.A., Hawkins, M., Retkute, R., Malla, S., Wilson, R., Blythe, M.J., Nakato, R., Komata, M., Shirahige, K., de Moura, A.P. et al. 2014. The dynamics of genome replication using deep sequencing. *Nucleic Acids Res* **42**(1): e3.

Muller, C.A. and Nieduszynski, C.A. 2012. Conservation of replication timing reveals global and local regulation of replication origin activity. *Genome Res* **22**(10): 1953-1962.

Pavlov, Y.I., Nguyen, D., and Kunkel, T.A. 2001. Mutator effects of overproducing DNA polymerase eta (Rad30) and its catalytically inactive variant in yeast. *Mutat Res* **478**(1-2): 129-139.

Polishko, A., Ponts, N., Le Roch, K.G., and Lonardi, S. 2012. NORMAL: accurate nucleosome positioning using a modified Gaussian mixture model. *Bioinformatics* **28**(12): i242-249.

Schneider, T.D. and Stephens, R.M. 1990. Sequence logos: a new way to display consensus sequences. *Nucleic Acids Res* **18**(20): 6097-6100.

Šidák, Z. 1967. Rectangular Confidence Regions for the Means of Multivariate Normal Distributions. *Journal of the American Statistical Association* **62**(318): 626-633.

Siow, C.C., Nieduszynska, S.R., Muller, C.A., and Nieduszynski, C.A. 2012. OriDB, the DNA replication origin database updated and extended. *Nucleic Acids Res* **40**(Database issue): D682-686.

Yabuki, N., Terashima, H., and Kitada, K. 2002. Mapping of early firing origins on a replication profile of budding yeast. *Genes Cells* **7**(8): 781-789.
