# Supplementary material for: Heterogeneous polymerase fidelity and mismatch repair bias genome variation and composition
Source: HighWire-hosted journal article supplement (doi:10.1101/gr.178335.114), 2014-09-12
Supplement: Supplemental_Table_S1.xlsx [file Supplemental_Table_S1.xlsx]

## Sheet: strain_table
	Strain List
	‡ POL	WT		pol1-L868M		pol2-M644G		pol3-L612M
	‡ MSH2	+	Δ	+	Δ	+	Δ*	+	Δ
	strain ID	d001	d0111	d101	d1112	d201	d2111/d2442	d301	d3112
	derived from †	h001	d011	h101	d112	h201	d211/d242	h301	d312
	isolate IDs	TAK136	TAK147	TAK138	TAK149	TAK140	TAK151	TAK142	TAK162
		TAK137	TAK148	TAK139	TAK150	TAK141	TAK152	TAK143	TAK163
		TAK070	TAK266	TAK072	TAK199	TAK074	TAK180	TAK076	TAK281
		TAK071	TAK258	TAK073	TAK269	TAK075	TAK166	TAK077	TAK279
		TAK112	TAK259	TAK118	TAK271	TAK124	TAK170	TAK130	TAK280
		TAK113	TAK260	TAK119	TAK272	TAK125	TAK217	TAK131	TAK215
		TAK114	TAK262	TAK121	TAK273	TAK126	TAK069	TAK132
		TAK115		TAK123	TAK175	TAK127	TAK159	TAK134
		TAK116			TAK216	TAK128	TAK068	TAK135
		TAK117			TAK264	TAK129	TAK206
	‡ diploid and homozygous
	† Lujan et al., 2013
	* d2442 is msh3Δ msh6Δ rather than msh2Δ

## Sheet: sample_table
		isolate		total			average	overall	matched	Percent completeness (average coverage sans rDNA loci, ploidy)
strain ID	genotype (all homozygous)	ID	passages	mutations	substitutions	indels	coverage	completeness	reads	Chromosome 1	Chromosome 2	Chromosome 3	Chromosome 4	Chromosome 5	Chromosome 6	Chromosome 7	Chromosome 8	Chromosome 9	Chromosome 10	Chromosome 11	Chromosome 12	Chromosome 13	Chromosome 14	Chromosome 15	Chromosome 16	mitochondrial genome
d001	WT	TAK136	1	0	0	0	323	97.2	36140536	96.1 (349, n=2)	99 (302.7, n=2)	98.4 (338.2, n=2)	97 (268.5, n=2)	97.5 (317.4, n=2)	97.9 (347.2, n=2)	97.1 (291.2, n=2)	98.2 (315.7, n=2)	96.2 (320.7, n=2)	95.3 (292.4, n=2)	100 (318.8, n=2)	93.8 (290.5, n=2)	97.4 (297.1, n=2)	98.5 (307.4, n=2)	98.2 (292.7, n=2)	96.3 (285.9, n=2)	99.9 (791.3, n≈5)
d001	WT	TAK137	1	0	0	0	548.5	97.1	52463835	96.4 (507.1, n=2)	99 (440.7, n=2)	98.3 (491.9, n=2)	96.9 (388.1, n=2)	97.4 (461.9, n=2)	97.8 (505.4, n=2)	97.1 (423, n=2)	98.1 (460.4, n=2)	96.1 (468.3, n=2)	95 (425.9, n=2)	100 (462.2, n=2)	93.8 (420.4, n=2)	97.4 (431.7, n=2)	98.4 (449.1, n=2)	98.2 (423.9, n=2)	96.4 (413.8, n=2)	99.9 (1141, n≈4)
d001	WT	TAK070	31	1	1	0	58.4	97.2	6945892	96.3 (67.7, n=2)	99 (57.2, n=2)	98.3 (65.3, n=2)	97 (51.7, n=2)	97.4 (61.2, n=2)	97.9 (67.9, n=2)	97.1 (55.7, n=2)	98.2 (59.6, n=2)	96 (60.9, n=2)	95.4 (55.3, n=2)	100 (60.9, n=2)	93.9 (56, n=2)	97.1 (56.7, n=2)	98.5 (57.6, n=2)	98.1 (55.9, n=2)	96.3 (55.4, n=2)	99.9 (1005.6, n≈34)
d001	WT	TAK071	31	4	4	0	97.1	97.2	11493548	96.3 (109.6, n=2)	99 (94.9, n=2)	98.3 (107.2, n=2)	97 (86.2, n=2)	97.5 (100.5, n=2)	97.9 (111.2, n=2)	97.2 (92.6, n=2)	98.3 (98.2, n=2)	96.1 (100.1, n=2)	95.4 (91.9, n=2)	100 (101.6, n=2)	94 (92, n=2)	97.4 (93.3, n=2)	98.5 (95.3, n=2)	98.2 (93, n=2)	96.4 (91.9, n=2)	99.9 (1506.6, n≈31)
d001	WT	TAK112	31	3	3	0	138.2	97.2	16192317	96.1 (154.6, n=2)	99 (135.7, n=2)	98.3 (150.6, n=2)	97 (120.7, n=2)	97.5 (142, n=2)	97.9 (154, n=2)	97.1 (130.5, n=2)	98.3 (141.4, n=2)	96.1 (142.8, n=2)	95.3 (131.7, n=2)	100 (142.4, n=2)	93.9 (129.8, n=2)	97.3 (133, n=2)	98.5 (138.2, n=2)	98.2 (130.7, n=2)	96.3 (128.1, n=2)	99.9 (402.4, n≈6)
d001	WT	TAK113	31	4	4	0	386.8	97.3	42328735	96.8 (410.3, n=2)	99.2 (353.7, n=2)	98.6 (394.4, n=2)	97 (314.8, n=2)	97.5 (371.5, n=2)	97.9 (404.7, n=2)	97.3 (340.8, n=2)	98.5 (369.9, n=2)	96.2 (373.2, n=2)	95.5 (341.8, n=2)	100 (371.8, n=2)	94.1 (345.7, n=2)	97.5 (347.8, n=2)	98.6 (360.1, n=2)	98.3 (341.5, n=2)	96.5 (332.8, n=2)	99.9 (1111.3, n≈6)
d001	WT	TAK114	31	7	7	0	676.2	97.5	72845263	96.9 (695.3, n=2)	99.2 (611.2, n=2)	98.7 (671.5, n=2)	97.2 (545.7, n=2)	97.6 (635.6, n=2)	97.9 (692.4, n=2)	97.4 (588, n=2)	98.8 (634.3, n=2)	96.3 (640.3, n=2)	95.9 (590.8, n=2)	100 (639.8, n=2)	94.3 (593.1, n=2)	97.8 (599, n=2)	98.7 (622.6, n=2)	98.4 (588.7, n=2)	96.6 (575.8, n=2)	99.9 (1740.3, n≈5)
d001	WT	TAK115	31	4	4	0	651.8	97.4	68252295	96.8 (651.4, n=2)	99.3 (573.2, n=2)	98.7 (631.9, n=2)	97.1 (510.8, n=2)	97.6 (596.4, n=2)	97.9 (646.8, n=2)	97.3 (551.5, n=2)	98.6 (596.9, n=2)	96.2 (599.2, n=2)	95.7 (554, n=2)	100 (600.2, n=2)	94.1 (549.6, n=2)	97.6 (560.7, n=2)	98.6 (581.6, n=2)	98.3 (551.8, n=2)	96.5 (540.6, n=2)	99.9 (1712.8, n≈5)
d001	WT	TAK116	31	3	3	0	643.5	97.4	66645878	96.7 (639.8, n=2)	99.3 (559.6, n=2)	98.5 (620.9, n=2)	97.1 (496, n=2)	97.5 (584, n=2)	98 (634, n=2)	97.2 (537.3, n=2)	98.6 (584.1, n=2)	96.1 (588.6, n=2)	95.6 (540.7, n=2)	100 (588, n=2)	94.1 (534.8, n=2)	97.6 (549, n=2)	98.6 (569.7, n=2)	98.3 (537.5, n=2)	96.5 (527, n=2)	99.9 (1600.3, n≈5)
d001	WT	TAK117	31	3	3	0	407	97.3	44279558	96.6 (423.9, n=2)	99.1 (372.9, n=2)	98.5 (410, n=2)	97 (329.3, n=2)	97.5 (387.6, n=2)	97.9 (421.6, n=2)	97.3 (357.4, n=2)	98.3 (387.9, n=2)	96.2 (389.1, n=2)	95.5 (360.1, n=2)	100 (391.4, n=2)	94 (356.1, n=2)	97.4 (364.1, n=2)	98.6 (378.2, n=2)	98.2 (357.5, n=2)	96.4 (351.3, n=2)	99.9 (1119.5, n≈6)
d0111	msh2Δ	TAK147	1	0	0	0	154.7	97.1	18372000	96.1 (162.8, n=2)	99.1 (153.4, n=2)	98.4 (161.8, n=2)	96.9 (144.2, n=2)	97.4 (155.1, n=2)	97.8 (164.6, n=2)	97.1 (148.8, n=2)	98.2 (156.1, n=2)	96.1 (156.8, n=2)	95.2 (149.3, n=2)	100 (161.7, n=2)	93.9 (148.8, n=2)	97.2 (151.5, n=2)	98.4 (152.7, n=2)	98.2 (149.1, n=2)	96.3 (147.9, n=2)	99.9 (1598.8, n≈21)
d0111	msh2Δ	TAK148	1	0	0	0	206.4	97.2	24376987	96.1 (215.4, n=2)	99.1 (203.6, n=2)	98.4 (216, n=2)	96.9 (191.9, n=2)	97.4 (206.4, n=2)	97.8 (219.2, n=2)	97.1 (198.1, n=2)	98.2 (207.4, n=2)	96 (207.3, n=2)	95.2 (197.7, n=2)	100 (214.9, n=2)	93.9 (196.3, n=2)	97.4 (200.1, n=2)	98.4 (202.2, n=2)	98.2 (198, n=2)	96.3 (196.7, n=2)	99.9 (2985.2, n≈29)
d0111	msh2Δ	TAK266	23	135	51	84	38.5	97	4653223	95.7 (90.2, n=2)	98.7 (36.7, n=2)	98.2 (74, n=2)	96.6 (22.4, n=2)	97.5 (49.6, n=2)	97.9 (92.9, n=2)	96.8 (32.5, n=2)	97.7 (50.8, n=2)	96.1 (55.2, n=2)	95.1 (37.7, n=2)	100 (43, n=2)	93.7 (30.4, n=2)	97 (32.4, n=2)	98.2 (38.4, n=2)	98 (30.1, n=2)	96.2 (31.9, n=2)	99.9 (1031.7, n≈54)
d0111	msh2Δ	TAK258	31	417	114	303	54.6	97.1	6382209	96.1 (98.3, n=2)	98.8 (53.1, n=2)	98.5 (87.3, n=2)	96.9 (35.1, n=2)	97.6 (65.2, n=2)	98 (100.7, n=2)	97 (46.9, n=2)	98 (65.5, n=2)	96.2 (72.6, n=2)	95.4 (53.2, n=2)	100 (59.4, n=2)	93.8 (42.3, n=2)	97.1 (48.6, n=2)	98.4 (53.1, n=2)	98.2 (44.7, n=2)	96.3 (47, n=2)	100 (3204.1, n≈117)
d0111	msh2Δ	TAK259	31	424	129	295	155	97.4	17737473	96.5 (178.7, n=2)	99.1 (149.3, n=2)	98.5 (177.3, n=2)	97.3 (122.1, n=2)	97.7 (165.3, n=2)	98 (185.8, n=2)	97.2 (141, n=2)	98.2 (163.2, n=2)	96.3 (167.2, n=2)	95.7 (147.2, n=2)	100 (160.5, n=2)	94.2 (138.7, n=2)	97.5 (144.1, n=2)	98.6 (151.4, n=2)	98.4 (137.7, n=2)	96.5 (139.4, n=2)	99.9 (2245, n≈29)
d0111	msh2Δ	TAK260	31	460	140	320	281.9	97.4	27116664	96.9 (436.9, n=2)	99.2 (221.6, n=2)	98.7 (386.7, n=2)	97.3 (142, n=2)	97.7 (288.1, n=2)	98.1 (456.5, n=2)	97.3 (202.2, n=2)	98.5 (289, n=2)	96.3 (307.1, n=2)	95.9 (224.6, n=2)	100 (255.6, n=2)	94.3 (182.1, n=2)	97.5 (191, n=2)	98.6 (231, n=2)	98.4 (184, n=2)	96.7 (193.5, n=2)	99.9 (4938.6, n≈35)
d0111	msh2Δ	TAK262	31	202	43	159	181	97.3	19859613	96.3 (236, n=2)	99 (168.5, n=2)	98.4 (229, n=2)	97.1 (115.3, n=2)	97.6 (200.4, n=2)	98 (253.1, n=2)	97.1 (155, n=2)	98.1 (197.5, n=2)	96.3 (197.6, n=2)	95.6 (167, n=2)	100 (181.3, n=2)	94.1 (155.9, n=2)	97.3 (155.4, n=2)	98.6 (169.2, n=2)	98.4 (143.6, n=2)	96.4 (153.7, n=2)	99.9 (2147.3, n≈24)
d101	pol1-L868M	TAK138	1	0	0	0	607.3	97.2	60103553	96.3 (587.6, n=2)	99.1 (505, n=2)	98.4 (571.6, n=2)	96.9 (438.9, n=2)	97.4 (530.9, n=2)	97.8 (587.8, n=2)	97.1 (484.2, n=2)	98 (529.3, n=2)	96.1 (539.6, n=2)	95.2 (489.4, n=2)	100 (532.6, n=2)	93.9 (479.6, n=2)	97.3 (494.9, n=2)	98.4 (515.4, n=2)	98.2 (484.7, n=2)	96.4 (472.5, n=2)	99.9 (1566.8, n≈5)
d101	pol1-L868M	TAK139	1	0	0	0	525.3	97.3	51075163	96.6 (498.3, n=2)	99.1 (428.5, n=2)	98.5 (483.7, n=2)	97 (375.1, n=2)	97.6 (450.3, n=2)	97.9 (497.1, n=2)	97.2 (411.2, n=2)	98.2 (448.6, n=2)	96.3 (454.8, n=2)	95.4 (413.6, n=2)	100 (450.6, n=2)	94.1 (408.5, n=2)	97.5 (419.8, n=2)	98.5 (440.8, n=2)	98.2 (412.4, n=2)	96.5 (401.3, n=2)	99.9 (1340.6, n≈5)
d101	pol1-L868M	TAK072	31	17	17	0	149.5	97.4	17569667	96.6 (167.2, n=2)	99.3 (145.4, n=2)	98.5 (164, n=2)	97.2 (132.2, n=2)	97.7 (152.4, n=2)	97.9 (168.1, n=2)	97.3 (141.7, n=2)	98.7 (149.5, n=2)	96.2 (151.2, n=2)	95.7 (141.2, n=2)	100 (155.1, n=2)	94.3 (141.4, n=2)	97.5 (143, n=2)	98.7 (145.7, n=2)	98.4 (142.4, n=2)	96.7 (140.4, n=2)	100 (2344, n≈31)
d101	pol1-L868M	TAK073	31	26	26	0	259.8	97.6	29808339	97.3 (281.6, n=2)	99.4 (246.9, n=2)	98.9 (278.2, n=2)	97.4 (221, n=2)	97.7 (262.7, n=2)	98.1 (285.9, n=2)	97.3 (239.7, n=2)	98.8 (255.8, n=2)	96.4 (260.7, n=2)	96.1 (239, n=2)	100 (263.2, n=2)	94.4 (239, n=2)	97.8 (243.6, n=2)	98.8 (250.4, n=2)	98.5 (240.5, n=2)	96.7 (237.7, n=2)	99.9 (3379.8, n≈26)
d101	pol1-L868M	TAK118	31	16	16	0	174.9	97.1	20371816	96 (192.6, n=2)	99 (171.3, n=2)	98.3 (187.7, n=2)	96.8 (151.5, n=2)	97.4 (177.9, n=2)	97.9 (193.2, n=2)	97.1 (165.1, n=2)	98.1 (177.8, n=2)	96.1 (178.5, n=2)	95.1 (165.9, n=2)	100 (180.3, n=2)	93.8 (164.2, n=2)	97.1 (167.8, n=2)	98.4 (173.9, n=2)	98.2 (165, n=2)	96.3 (161.7, n=2)	99.9 (521, n≈6)
d101	pol1-L868M	TAK119	31	12	12	0	406.4	97.4	44698351	97.1 (419.3, n=2)	99.4 (375, n=2)	98.7 (410, n=2)	97.2 (334.4, n=2)	97.6 (389, n=2)	98 (421, n=2)	97.2 (361, n=2)	98.7 (388.7, n=2)	96.3 (390.8, n=2)	95.6 (362.5, n=2)	100 (394, n=2)	94.3 (364.1, n=2)	97.6 (368, n=2)	98.7 (380.6, n=2)	98.4 (361.6, n=2)	96.6 (353.9, n=2)	99.9 (1229.4, n≈6)
d101	pol1-L868M	TAK121	31	11	11	0	347.8	97.2	38629793	96.6 (373.1, n=2)	99.1 (323.8, n=2)	98.4 (358.3, n=2)	96.9 (287.1, n=2)	97.5 (339.1, n=2)	97.8 (369.6, n=2)	97.1 (311.3, n=2)	98.3 (338.3, n=2)	96.2 (341.6, n=2)	95.3 (313.9, n=2)	100 (340.5, n=2)	93.9 (309.4, n=2)	97.4 (318.5, n=2)	98.6 (333, n=2)	98.2 (311.8, n=2)	96.4 (304.6, n=2)	99.9 (916.5, n≈5)
d101	pol1-L868M	TAK123	31	15	15	0	556	97.4	53926767	97 (513.2, n=2)	99.2 (452.4, n=2)	98.6 (498.2, n=2)	97.1 (400.4, n=2)	97.6 (470.7, n=2)	97.9 (511.2, n=2)	97.3 (435.8, n=2)	98.6 (472, n=2)	96.3 (474.8, n=2)	95.7 (437.9, n=2)	100 (477, n=2)	94.2 (430.5, n=2)	97.5 (444.7, n=2)	98.6 (466.6, n=2)	98.4 (436.4, n=2)	96.6 (426.3, n=2)	99.9 (1282.2, n≈5)
d1112	pol1-L868M msh2Δ	TAK149	1	0	0	0	212	97.2	25409833	96.2 (214.9, n=2)	99.1 (212, n=2)	98.4 (214.2, n=2)	96.9 (202.6, n=2)	97.4 (211.7, n=2)	97.8 (218.4, n=2)	97.1 (207.9, n=2)	98.4 (212.2, n=2)	96 (210.2, n=2)	95.3 (204.7, n=2)	100 (220.1, n=2)	93.9 (216.4, n=2)	97.4 (208.5, n=2)	98.5 (210.3, n=2)	98.3 (207.4, n=2)	96.4 (204.9, n=2)	100 (1941, n≈18)
d1112	pol1-L868M msh2Δ	TAK150	1	0	0	0	137.3	97.1	16465262	96 (141, n=2)	98.9 (136.6, n=2)	98.3 (142.1, n=2)	96.8 (131.6, n=2)	97.5 (137.6, n=2)	97.8 (143.1, n=2)	97.1 (134.7, n=2)	98 (137.7, n=2)	96 (137.4, n=2)	95.1 (132, n=2)	100 (142.6, n=2)	93.8 (138.3, n=2)	97.1 (135, n=2)	98.4 (136.1, n=2)	98.1 (134.4, n=2)	96.2 (132.7, n=2)	99.9 (2340, n≈34)
d1112	pol1-L868M msh2Δ	TAK199	1	0	0	0	195.1	97.1	23740425	95.7 (191.9, n=2)	99 (196.5, n=2)	98.3 (193.8, n=2)	97 (192.7, n=2)	97.5 (190.4, n=2)	97.9 (194, n=2)	97 (195.7, n=2)	97.8 (193.7, n=2)	96.1 (191.3, n=2)	95.2 (188.5, n=2)	100 (201.8, n=2)	93.9 (219.2, n=2)	97.2 (194.3, n=2)	98.5 (194.7, n=2)	98.1 (196.2, n=2)	96.3 (192.9, n=2)	99.9 (3097.4, n≈32)
d1112	pol1-L868M msh2Δ	TAK269	23	1033	888	145	65.2	97.1	7586964	96 (118.9, n=2)	98.7 (62.8, n=2)	98.2 (99.9, n=2)	96.9 (44.6, n=2)	97.5 (73.5, n=2)	97.9 (119.8, n=2)	96.9 (54.2, n=2)	98.1 (77, n=2)	96.2 (87.8, n=2)	95.4 (63.6, n=2)	100 (70, n=2)	93.9 (48.2, n=2)	97.2 (58.7, n=2)	98.3 (64.2, n=2)	98.2 (52.8, n=2)	96.4 (57, n=2)	99.9 (3506.8, n≈108)
d1112	pol1-L868M msh2Δ	TAK271	23	1341	1137	203	183.5	97.4	19977989	96.4 (125.8, n=1)	99.1 (161.2, n=2)	98.5 (232.4, n=2)	97.2 (135, n=2)	97.6 (187.8, n=2)	98 (260, n=2)	97.2 (156.4, n=2)	98.2 (187.8, n=2)	96.2 (196.1, n=2)	95.8 (163, n=2)	100 (177.4, n=2)	94.2 (169, n=2)	97.4 (154.8, n=2)	98.7 (171.5, n=2)	98.4 (150.6, n=2)	96.6 (152.8, n=2)	100 (27015.9, n≈294)
d1112	pol1-L868M msh2Δ	TAK272	23	1065	965	100	180.4	97.2	21161053	95.9 (193.7, n=2)	98.9 (174.8, n=2)	98.3 (193.5, n=2)	97.1 (162.1, n=2)	97.5 (176.1, n=2)	98 (197.5, n=2)	97.1 (170.7, n=2)	98.1 (182, n=2)	96.1 (186.1, n=2)	95.5 (169.4, n=2)	100 (184.3, n=2)	94 (180.1, n=2)	97.3 (173.3, n=2)	98.5 (178.3, n=2)	98.2 (170.7, n=2)	96.4 (169.1, n=2)	99.9 (6669.1, n≈74)
d1112	pol1-L868M msh2Δ	TAK273	23	1092	944	148	593.3	97.6	57908054	97.2 (565.9, n=2)	99.3 (477.6, n=2)	98.8 (545, n=2)	97.5 (430.5, n=2)	97.7 (508.6, n=2)	98.1 (579.9, n=2)	97.4 (464.3, n=2)	98.5 (504.6, n=2)	96.5 (513.1, n=2)	96.1 (464, n=2)	100 (503, n=2)	94.5 (484.5, n=2)	97.7 (470, n=2)	98.8 (481.6, n=2)	98.5 (460.2, n=2)	96.8 (456.9, n=2)	100 (19491.9, n≈66)
d1112	pol1-L868M msh2Δ	TAK175	31	794	613	181	162.1	97	19515942	95.5 (163.4, n=2)	98.8 (161.9, n=2)	98.2 (162.8, n=2)	96.8 (157.7, n=2)	97.5 (162.2, n=2)	97.8 (165.1, n=2)	96.9 (159.8, n=2)	97.5 (161.6, n=2)	95.9 (158.5, n=2)	95.1 (155.9, n=2)	100 (167.7, n=2)	93.7 (175, n=2)	97 (159.5, n=2)	98.3 (161.1, n=2)	98 (160, n=2)	96.2 (158, n=2)	99.9 (6122.7, n≈76)
d1112	pol1-L868M msh2Δ	TAK216	31	2643	2463	180	115	97	13757927	95.8 (118.7, n=2)	98.7 (113.9, n=2)	98.1 (118.4, n=2)	96.9 (108.2, n=2)	97.4 (115.5, n=2)	97.8 (119.8, n=2)	97 (111.2, n=2)	97.6 (115.3, n=2)	96 (114.5, n=2)	95 (110, n=2)	100 (118.9, n=2)	93.7 (126.1, n=2)	97.1 (111.8, n=2)	98.4 (113.1, n=2)	98 (111.4, n=2)	96.2 (110.3, n=2)	99.9 (3328.3, n≈58)
d1112	pol1-L868M msh2Δ	TAK264	31	4828	4612	216	358.2	97.4	36116504	96.5 (392.3, n=2)	99.2 (298.2, n=2)	98.5 (381.8, n=2)	97.2 (240.4, n=2)	97.6 (340.1, n=2)	98 (412.2, n=2)	97.3 (280, n=2)	98.4 (344.2, n=2)	96.3 (368.7, n=2)	95.7 (304.1, n=2)	100 (328.7, n=2)	94.3 (279.8, n=2)	97.5 (284.4, n=2)	98.6 (308.4, n=2)	98.3 (275, n=2)	96.6 (278.3, n=2)	99.9 (3528.1, n≈20)
d201	pol2-M644G	TAK140	1	0	0	0	393.4	97.1	42842076	96.2 (407, n=2)	99 (356, n=2)	98.2 (401.8, n=2)	96.9 (315.2, n=2)	97.4 (379.9, n=2)	97.8 (413.3, n=2)	97 (344.3, n=2)	97.9 (373, n=2)	96.1 (382.5, n=2)	95.1 (347.6, n=2)	100 (378.3, n=2)	93.7 (347.5, n=2)	97.2 (355.8, n=2)	98.3 (364.4, n=2)	98.1 (346.7, n=2)	96.2 (340.2, n=2)	99.9 (3369, n≈17)
d201	pol2-M644G	TAK141	1	0	0	0	280.2	97.1	31885871	96 (299.3, n=2)	98.9 (264.1, n=2)	98.3 (295.8, n=2)	96.8 (235.6, n=2)	97.4 (282.5, n=2)	97.8 (305.3, n=2)	97 (256.4, n=2)	98 (276, n=2)	96.1 (282.7, n=2)	95 (258.9, n=2)	100 (282, n=2)	93.7 (261.8, n=2)	97.2 (264.8, n=2)	98.4 (268.5, n=2)	98 (258.9, n=2)	96.3 (253.6, n=2)	99.9 (2785.5, n≈20)
d201	pol2-M644G	TAK074	31	38	38	0	100.6	97.2	11932080	95.9 (110.5, n=2)	99.2 (96.9, n=2)	98.4 (109.3, n=2)	97.1 (87.8, n=2)	97.5 (105.2, n=2)	97.9 (110.5, n=2)	97.1 (95.5, n=2)	98.2 (98.9, n=2)	96.1 (104.7, n=2)	95.4 (95.1, n=2)	100 (105.6, n=2)	93.9 (104.8, n=2)	97.4 (98, n=2)	98.5 (96.2, n=2)	98.2 (97.4, n=2)	96.3 (95, n=2)	99.9 (3713.5, n≈74)
d201	pol2-M644G	TAK075	31	41	41	0	79.9	97.1	9520066	96.3 (86.3, n=2)	99 (79.1, n=2)	98.2 (86.1, n=2)	96.9 (71.6, n=2)	97.4 (83.3, n=2)	97.9 (88.3, n=2)	97 (77.1, n=2)	98.1 (80.3, n=2)	96.1 (81.8, n=2)	95.2 (76.7, n=2)	100 (84.1, n=2)	93.8 (76.7, n=2)	97.2 (78.7, n=2)	98.4 (78.5, n=2)	98.1 (77.8, n=2)	96.3 (77, n=2)	99.9 (3081, n≈77)
d201	pol2-M644G	TAK124	31	44	43	1	382.1	97.3	42281365	96.4 (397.8, n=2)	99.2 (351.2, n=2)	98.5 (391, n=2)	97.1 (315, n=2)	97.6 (371.9, n=2)	97.9 (400, n=2)	97.1 (340.3, n=2)	98.2 (365.6, n=2)	96.2 (373.1, n=2)	95.4 (341.6, n=2)	100 (371.1, n=2)	94.1 (348.6, n=2)	97.5 (349.5, n=2)	98.6 (358.9, n=2)	98.3 (342.4, n=2)	96.5 (335.1, n=2)	99.9 (3547.4, n≈19)
d201	pol2-M644G	TAK125	31	22	21	1	291.2	97.3	35027458	96.6 (308.8, n=2)	99.1 (275.6, n=2)	98.3 (307, n=2)	97.2 (370, n=3)	97.6 (291.8, n=2)	98 (313.8, n=2)	97.1 (266.4, n=2)	98.3 (287.2, n=2)	96.2 (292.4, n=2)	95.5 (268.2, n=2)	100 (293.4, n=2)	94.1 (269.5, n=2)	97.4 (275, n=2)	98.6 (282.6, n=2)	98.3 (269.3, n=2)	96.4 (261.3, n=2)	99.9 (2386.4, n≈16)
d201	pol2-M644G	TAK126	31	58	57	1	333.8	97.1	38892704	95.9 (347.2, n=2)	99 (312.3, n=2)	98.3 (344.3, n=2)	96.9 (284.2, n=2)	97.4 (332.8, n=2)	97.8 (350.2, n=2)	97 (305.3, n=2)	98.1 (326.5, n=2)	96.1 (332.7, n=2)	95.2 (304.2, n=2)	100 (496.7, n=3)	93.9 (311.8, n=2)	97.4 (313.5, n=2)	98.4 (321.7, n=2)	98.1 (307.4, n=2)	96.3 (299.5, n=2)	99.9 (3303.3, n≈20)
d201	pol2-M644G	TAK127	31	44	44	0	267.8	97.2	32081733	96.4 (284.6, n=2)	99 (256.3, n=2)	98.4 (281.7, n=2)	96.9 (230.8, n=2)	97.4 (272.6, n=2)	97.8 (287.6, n=2)	97.2 (249, n=2)	98 (267.2, n=2)	96.2 (541.5, n=4)	95.2 (249.2, n=2)	100 (272.1, n=2)	93.8 (256.1, n=2)	97.4 (256.5, n=2)	98.4 (260.3, n=2)	98.2 (250.3, n=2)	96.4 (245.9, n=2)	99.9 (2038.4, n≈15)
d201	pol2-M644G	TAK128	31	37	36	1	192.1	97.1	22363715	96 (207, n=2)	98.9 (186.5, n=2)	98.2 (205.6, n=2)	96.9 (167.8, n=2)	97.4 (196.3, n=2)	97.8 (210.5, n=2)	97 (181, n=2)	97.9 (194.7, n=2)	96.1 (196.9, n=2)	95.2 (181.3, n=2)	100 (197.5, n=2)	93.7 (179.3, n=2)	97.2 (184.7, n=2)	98.4 (190.4, n=2)	98.1 (182, n=2)	96.3 (177.8, n=2)	99.9 (1743.5, n≈18)
d201	pol2-M644G	TAK129	31	49	48	1	280.1	97	32145109	96 (295.9, n=2)	99 (267.4, n=2)	98.3 (293.4, n=2)	96.8 (242, n=2)	97.4 (281.6, n=2)	97.8 (298.3, n=2)	97 (258.9, n=2)	97.8 (280.1, n=2)	96.1 (283.2, n=2)	95 (260.2, n=2)	100 (281.9, n=2)	93.7 (262.6, n=2)	97.1 (266.4, n=2)	98.3 (274, n=2)	98.1 (261.1, n=2)	96.3 (255, n=2)	99.9 (2018.2, n≈14)
d2111	pol2-M644G msh2Δ	TAK151	1	0	0	0	230	97.1	26957032	96.5 (241.8, n=2)	99.1 (223.2, n=2)	98.3 (241.6, n=2)	96.8 (207.6, n=2)	97.4 (231.5, n=2)	97.8 (243.1, n=2)	97.1 (217.8, n=2)	98.1 (228.3, n=2)	96 (236.2, n=2)	95.3 (218.5, n=2)	100 (237, n=2)	93.8 (222.5, n=2)	97.3 (223.2, n=2)	98.4 (222.5, n=2)	98.1 (217.8, n=2)	96.3 (216, n=2)	99.9 (3461.4, n≈30)
d2111	pol2-M644G msh2Δ	TAK152	1	0	0	0	193.2	97.2	23316155	96.1 (192.3, n=2)	99.2 (191.9, n=2)	98.5 (195.5, n=2)	96.9 (185.5, n=2)	97.5 (194.3, n=2)	97.8 (194.4, n=2)	97.2 (191.3, n=2)	98.2 (192.1, n=2)	96.2 (191, n=2)	95.2 (187.2, n=2)	100 (202.3, n=2)	94 (206.3, n=2)	97.4 (191.7, n=2)	98.5 (190, n=2)	98.2 (190.9, n=2)	96.4 (188.2, n=2)	99.9 (4591, n≈48)
d2111	pol2-M644G msh2Δ	TAK180	17	1219	1038	180	335.2	97.2	39999624	96 (338.1, n=2)	99 (333, n=2)	98.3 (337.6, n=2)	97.1 (322.6, n=2)	97.5 (333.4, n=2)	97.9 (337.6, n=2)	97.1 (329.6, n=2)	97.9 (334.2, n=2)	96.1 (331, n=2)	95.4 (322.2, n=2)	100 (346, n=2)	94.1 (338.7, n=2)	97.3 (331.6, n=2)	98.5 (332.8, n=2)	98.2 (330.4, n=2)	96.4 (324, n=2)	99.9 (4746.7, n≈28)
d2111	pol2-M644G msh2Δ	TAK166	23	2137	1960	177	314.2	97.3	38300592	96.4 (311, n=2)	99.2 (316.8, n=2)	98.5 (304.7, n=2)	97 (310.2, n=2)	97.4 (318, n=2)	97.8 (314.1, n=2)	97.2 (316.2, n=2)	98.2 (316.7, n=2)	96.1 (310.7, n=2)	95.3 (306.9, n=2)	100 (330.1, n=2)	94.1 (332.4, n=2)	97.5 (317.2, n=2)	98.6 (314.1, n=2)	98.2 (316.7, n=2)	96.4 (310.9, n=2)	100 (6918, n≈44)
d2111	pol2-M644G msh2Δ	TAK170	31	3051	2844	207	230.5	97.3	28048486	96.5 (228.8, n=2)	99.1 (230.7, n=2)	98.4 (228.4, n=2)	97 (227.4, n=2)	97.5 (229.6, n=2)	97.8 (230, n=2)	97.1 (229.6, n=2)	98.2 (229.4, n=2)	96.1 (225.7, n=2)	95.5 (222.9, n=2)	100 (239.6, n=2)	94.1 (256, n=2)	97.5 (229.8, n=2)	98.5 (229.9, n=2)	98.3 (230.4, n=2)	96.3 (225.9, n=2)	100 (7651.2, n≈66)
d2111	pol2-M644G msh2Δ	TAK217	31	3115	2619	496	203	97.1	24659361	95.9 (196.3, n=2)	99 (204.5, n=2)	98.3 (202.1, n=2)	97 (201.8, n=2)	97.5 (205.3, n=2)	97.9 (200.8, n=2)	97 (204.2, n=2)	97.7 (204.2, n=2)	96.2 (200.3, n=2)	95.3 (197.3, n=2)	100 (212.4, n=2)	93.9 (211.1, n=2)	97.3 (204.3, n=2)	98.4 (203.2, n=2)	98.1 (204.5, n=2)	96.3 (201.6, n=2)	100 (10931.4, n≈108)
d2442	pol2-M644G msh3Δ msh6Δ	TAK069	1	0	0	0	293.5	97	34933531	95.9 (294.7, n=2)	98.9 (288.3, n=2)	98.1 (297.6, n=2)	96.9 (278.4, n=2)	97.5 (291.9, n=2)	97.9 (304.2, n=2)	97 (287.3, n=2)	97.6 (288.3, n=2)	96.1 (290.6, n=2)	95.1 (280.3, n=2)	100 (304.3, n=2)	93.7 (302.6, n=2)	97.1 (288.1, n=2)	98.4 (286.4, n=2)	98 (288.8, n=2)	96.2 (284, n=2)	99.9 (1399.5, n≈10)
d2442	pol2-M644G msh3Δ msh6Δ	TAK159	1	0	0	0	185	97.1	22742009	96.2 (183, n=2)	99.1 (185.5, n=2)	97.4 (184.3, n=2)	96.6 (179.5, n=2)	97.4 (187, n=2)	97.8 (188, n=2)	97.1 (182.9, n=2)	98.2 (185.4, n=2)	96.2 (277.4, n=3)	95.2 (180, n=2)	100 (192.7, n=2)	93.7 (189.3, n=2)	97.3 (185.2, n=2)	98.5 (184.6, n=2)	98.1 (184.5, n=2)	96.3 (180.9, n=2)	99.9 (2869.5, n≈31)
d2442	pol2-M644G msh3Δ msh6Δ	TAK068	31	2218	1977	241	349.7	97	41563563	95.6 (344.3, n=2)	98.8 (345.7, n=2)	97.3 (350.3, n=2)	96.6 (331.2, n=2)	97.4 (348.8, n=2)	97.8 (359.2, n=2)	97.1 (342.5, n=2)	97.6 (346.5, n=2)	96 (347.8, n=2)	95 (335.8, n=2)	100 (363.8, n=2)	93.6 (351.4, n=2)	97.1 (344.3, n=2)	98.4 (343.8, n=2)	98 (344.5, n=2)	96.3 (337.8, n=2)	95.7 (3.9, n≈0)
d2442	pol2-M644G msh3Δ msh6Δ	TAK206	31	2533	2057	476	150	96.9	18290457	95.7 (144.5, n=2)	98.8 (151.3, n=2)	97.4 (141.5, n=2)	96.6 (148.9, n=2)	97.4 (152, n=2)	97.8 (146.2, n=2)	96.9 (150.6, n=2)	97.4 (149.9, n=2)	96 (147.4, n=2)	95 (146.2, n=2)	100 (157.3, n=2)	93.6 (166.2, n=2)	97.1 (150.7, n=2)	98.3 (150.9, n=2)	98 (151.1, n=2)	96.2 (149.1, n=2)	99.9 (6842.3, n≈91)
d301	pol3-L612M	TAK142	1	0	0	0	693.9	97.5	75798947	97.3 (743.2, n=2)	99.4 (636.4, n=2)	98.7 (717.3, n=2)	97.2 (553.7, n=2)	97.6 (672.5, n=2)	97.9 (744.5, n=2)	97.3 (608.9, n=2)	98.8 (667.7, n=2)	96.3 (679.4, n=2)	95.8 (618.6, n=2)	100 (670.9, n=2)	94.3 (605, n=2)	97.7 (622.8, n=2)	98.7 (646.6, n=2)	98.4 (609, n=2)	96.7 (596.7, n=2)	99.9 (1581.2, n≈5)
d301	pol3-L612M	TAK143	1	0	0	0	676.2	97.5	72325659	97.3 (709.2, n=2)	99.3 (608.4, n=2)	98.7 (685.5, n=2)	97.2 (526.5, n=2)	97.6 (641.3, n=2)	98 (710.9, n=2)	97.4 (582.4, n=2)	98.7 (639.1, n=2)	96.4 (646.6, n=2)	96 (591.5, n=2)	100 (642.6, n=2)	94.3 (573.6, n=2)	97.8 (593.5, n=2)	98.7 (618.5, n=2)	98.4 (581.8, n=2)	96.7 (570.2, n=2)	99.9 (1631.1, n≈5)
d301	pol3-L612M	TAK076	31	33	32	1	74	97.2	8811803	96.2 (80.4, n=2)	99.1 (73, n=2)	98.3 (80.7, n=2)	97 (66.4, n=2)	97.5 (76.8, n=2)	97.9 (82.7, n=2)	97 (70.9, n=2)	98.1 (74.9, n=2)	96 (75.8, n=2)	95.2 (70.7, n=2)	100 (78.1, n=2)	94 (72.7, n=2)	97.3 (71.9, n=2)	98.5 (73.2, n=2)	98.2 (71.1, n=2)	96.5 (70.3, n=2)	99.9 (1121.4, n≈30)
d301	pol3-L612M	TAK077	31	38	38	0	83.8	97.2	9972319	96 (91.3, n=2)	99.1 (82.7, n=2)	98.3 (90.4, n=2)	96.9 (75.5, n=2)	97.5 (86.5, n=2)	97.9 (92.5, n=2)	97.1 (80.6, n=2)	98.2 (84.9, n=2)	96 (85.5, n=2)	95.2 (80.7, n=2)	100 (87.8, n=2)	93.9 (81.4, n=2)	97.3 (81.6, n=2)	98.5 (82.8, n=2)	98.2 (80.9, n=2)	96.3 (80, n=2)	99.9 (1029.9, n≈25)
d301	pol3-L612M	TAK130	31	33	33	0	364	97	40089782	95.9 (384.2, n=2)	98.9 (336.5, n=2)	98.2 (373.7, n=2)	96.7 (296, n=2)	97.4 (352.8, n=2)	97.8 (385.1, n=2)	97.1 (322.2, n=2)	97.9 (351.7, n=2)	96.1 (356, n=2)	95.1 (337.9, n=2)	100 (353.8, n=2)	93.7 (320, n=2)	97.3 (328.8, n=2)	98.4 (343.6, n=2)	98 (321.8, n=2)	96.3 (315.3, n=2)	99.9 (784.9, n≈4)
d301	pol3-L612M	TAK131	31	39	37	2	607.5	97.2	60221121	96.4 (593.8, n=2)	99.1 (505.9, n=2)	98.3 (564.3, n=2)	96.9 (448.8, n=2)	97.5 (529.4, n=2)	97.8 (584, n=2)	97.1 (484, n=2)	98.1 (526.5, n=2)	96.2 (533.7, n=2)	95.1 (488.2, n=2)	100 (529.4, n=2)	93.9 (485.7, n=2)	97.4 (491.7, n=2)	98.5 (513.7, n=2)	98.2 (484.4, n=2)	96.3 (474, n=2)	99.9 (1289.5, n≈4)
d301	pol3-L612M	TAK132	31	42	42	0	385.6	97.1	41929517	96.1 (410, n=2)	99 (352.6, n=2)	98.4 (393.2, n=2)	96.8 (311.5, n=2)	97.4 (368.2, n=2)	97.8 (405.3, n=2)	97 (337.6, n=2)	97.9 (367.5, n=2)	96.1 (372.4, n=2)	95.2 (340.5, n=2)	100 (370.3, n=2)	93.7 (335.2, n=2)	97.2 (344.3, n=2)	98.4 (359, n=2)	98.1 (337.2, n=2)	96.2 (330.8, n=2)	99.9 (948.7, n≈5)
d301	pol3-L612M	TAK134	31	46	46	0	340.2	97.1	37821192	96 (364.3, n=2)	98.8 (317.9, n=2)	98.1 (353.7, n=2)	96.8 (279.3, n=2)	97.4 (332.4, n=2)	97.8 (362.5, n=2)	97 (306.2, n=2)	97.8 (332.7, n=2)	96.1 (334.6, n=2)	95.2 (308, n=2)	100 (335.3, n=2)	93.8 (303.2, n=2)	97.3 (310.8, n=2)	98.4 (323.8, n=2)	98.1 (304.8, n=2)	96.3 (297.8, n=2)	99.9 (783.1, n≈5)
d301	pol3-L612M	TAK135	31	37	37	0	218.6	97.1	25109534	95.9 (244.9, n=2)	99 (210.5, n=2)	98.2 (235.8, n=2)	96.8 (186.8, n=2)	97.4 (220.7, n=2)	97.8 (242.5, n=2)	97 (202.3, n=2)	97.9 (219.9, n=2)	96.2 (222.9, n=2)	95.1 (203.8, n=2)	100 (220.8, n=2)	93.8 (202.3, n=2)	97.2 (205.9, n=2)	98.4 (213.9, n=2)	98.1 (202.2, n=2)	96.2 (197.2, n=2)	99.9 (471.4, n≈4)
d3112	pol3-L612M msh2Δ	TAK162	1	0	0	0	322.2	97.2	38050912	96.2 (328, n=2)	99 (317.4, n=2)	98.5 (324.7, n=2)	96.9 (302.4, n=2)	97.4 (319, n=2)	97.8 (331, n=2)	97.1 (311.5, n=2)	98.2 (319.2, n=2)	96.1 (320.5, n=2)	95.3 (309.7, n=2)	100 (331.3, n=2)	93.9 (312.7, n=2)	97.3 (315.7, n=2)	98.5 (315.8, n=2)	98.2 (311.5, n=2)	96.3 (307, n=2)	99.9 (2974.5, n≈18)
d3112	pol3-L612M msh2Δ	TAK163	1	0	0	0	389.2	97.2	45337795	96.5 (396, n=2)	99.1 (377.5, n=2)	98.5 (392.3, n=2)	96.9 (360.8, n=2)	97.4 (378.9, n=2)	97.7 (397.6, n=2)	97.1 (369.7, n=2)	98.2 (380.7, n=2)	96 (382.4, n=2)	95.3 (368.9, n=2)	100 (394.9, n=2)	94 (372.1, n=2)	97.3 (376.1, n=2)	98.5 (376.8, n=2)	98.2 (370.6, n=2)	96.4 (364.8, n=2)	99.9 (2844.4, n≈15)
d3112	pol3-L612M msh2Δ	TAK281	17	3115	2656	459	373.3	97.4	40609553	96.4 (199.8, n=1)	99.2 (338.2, n=2)	98.6 (387.8, n=2)	97.3 (304, n=2)	97.6 (361.7, n=2)	98 (393.1, n=2)	97.2 (332.1, n=2)	98.3 (347.8, n=2)	96.3 (370.8, n=2)	95.8 (333.3, n=2)	100 (357.9, n=2)	94.2 (340.1, n=2)	97.6 (335.9, n=2)	98.7 (338.9, n=2)	98.5 (340.5, n=2)	96.7 (320.1, n=2)	99.9 (6836.7, n≈37)
d3112	pol3-L612M msh2Δ	TAK279	23	2419	2077	341	226.6	97.3	25794487	96.2 (253.7, n=2)	99 (217.3, n=2)	98.4 (246.1, n=2)	97 (188.4, n=2)	97.7 (234.8, n=2)	98 (253, n=2)	97.1 (204, n=2)	98.2 (223.9, n=2)	96.2 (238.2, n=2)	95.5 (210.1, n=2)	100 (228.1, n=2)	94.1 (206.1, n=2)	97.3 (211.6, n=2)	98.6 (217.9, n=2)	98.3 (205.1, n=2)	96.5 (205.6, n=2)	99.7 (11, n≈0)
d3112	pol3-L612M msh2Δ	TAK280	23	3807	3305	502	537.3	97.5	49023663	96.9 (501.2, n=2)	99.3 (409.1, n=2)	98.7 (481.1, n=2)	97.3 (360.1, n=2)	97.6 (435.6, n=2)	98.1 (498.8, n=2)	97.3 (389.5, n=2)	98.5 (434.9, n=2)	96.3 (452.8, n=2)	96.1 (402.9, n=2)	100 (433, n=2)	94.3 (382.9, n=2)	97.6 (398.7, n=2)	98.7 (414.9, n=2)	98.5 (390.7, n=2)	96.7 (385.4, n=2)	99.9 (11437.7, n≈43)
d3112	pol3-L612M msh2Δ	TAK215	31	4389	3776	613	265.6	97	32025252	95.4 (262.3, n=2)	98.8 (267.6, n=2)	98.1 (267.5, n=2)	96.7 (260, n=2)	97.4 (265.5, n=2)	97.8 (265.7, n=2)	97 (265.4, n=2)	97.6 (265.7, n=2)	96.1 (262.4, n=2)	95 (258.6, n=2)	100 (276.8, n=2)	93.6 (271.2, n=2)	97.1 (266.3, n=2)	98.3 (265.2, n=2)	98 (265.6, n=2)	96.2 (260.6, n=2)	99.9 (3595.9, n≈27)

## Sheet: filtered_regions
Sequence	Name	Type	Region	Qualifiers	position	chromosome	comp?	start_ID	end_ID
chr1_ref v2	Retrotransposon TYA Gag and TYB Pol genes; inYARCTY1-1 TYB is mutant and probably non-functional	CDS	complement(160309..163899)	/locus_tag="YAR009C"; /inference="non-experimental evidence, no additional details recorded"; /note="Yar009cp"; /codon_start=1; /product="Retrotransposon TYA Gag and TYB Pol genes; in YARCTY1-1 TYB is mutant and probably non-functional"; /protein_id="NP_009406.1"; /db_xref="GI:6319323"; /db_xref="SGD:S000000067"; /db_xref="GeneID:851268"; /translation="METFTGYLKSTCFHQISPYPPSIMSIQVKVHANILILSFIECLR…	160309..163899	1	TRUE	10160309	10163899
chr1_ref v2	Retrotransposon TYA Gag gene co-transcribed withTYB Pol; in YARCTY1-1 TYB is mutant and probablynon-functional	CDS	complement(164256..165578)	/locus_tag="YAR010C"; /inference="non-experimental evidence, no additional details recorded"; /note="Yar010cp"; /codon_start=1; /product="Retrotransposon TYA Gag gene co-transcribed with TYB Pol; in YARCTY1-1 TYB is mutant and probably non-functional"; /protein_id="NP_009407.1"; /db_xref="GI:6319324"; /db_xref="SGD:S000000068"; /db_xref="GeneID:851269"; /translation="MESQQLSQHSPISHGSACASVTSKEVHTN…	164256..165578	1	TRUE	10164256	10165578
chr2_ref v2	Retrotransposon TYA Gag gene co-transcribed withTYB Pol; translated as TYA or TYA-TYB polyprotein; Gag isa nucleocapsid protein that is the structural constituentof virus-like particles (VLPs); similar to retroviral Gag	CDS	29933..31249	/locus_tag="YBL100W-A"; /inference="non-experimental evidence, no additional details recorded"; /note="Ybl100w-ap"; /codon_start=1; /product="Retrotransposon TYA Gag gene co-transcribed with TYB Pol; translated as TYA or TYA-TYB polyprotein; Gag is a nucleocapsid protein that is the structural constituent of virus-like particles (VLPs); similar to retroviral Gag"; /protein_id="NP_009451.1"; /db_x…	29933..31249	2	FALSE	20029933	20031249
chr2_ref v2	Retrotransposon TYA Gag and TYB Pol genes;transcribed/translated as one unit; polyprotein isprocessed to make a nucleocapsid-like protein (Gag),reverse transcriptase (RT), protease (PR), and integrase(IN); similar to retroviral genes_left	CDS	29933..31225	/locus_tag="YBL100W-B"; /inference="non-experimental evidence, no additional details recorded"; /note="Ybl100w-bp"; /codon_start=1; /product="Retrotransposon TYA Gag and TYB Pol genes; transcribed/translated as one unit; polyprotein is processed to make a nucleocapsid-like protein (Gag), reverse transcriptase (RT), protease (PR), and integrase (IN); similar to retroviral genes"; /protein_id="NP_0…	29933..31225	2	FALSE	20029933	20031225
chr2_ref v2	Retrotransposon TYA Gag and TYB Pol genes;transcribed/translated as one unit; polyprotein isprocessed to make a nucleocapsid-like protein (Gag),reverse transcriptase (RT), protease (PR), and integrase(IN); similar to retroviral genes_right	CDS	31227..35246	/locus_tag="YBL100W-B"; /inference="non-experimental evidence, no additional details recorded"; /note="Ybl100w-bp"; /codon_start=1; /product="Retrotransposon TYA Gag and TYB Pol genes; transcribed/translated as one unit; polyprotein is processed to make a nucleocapsid-like protein (Gag), reverse transcriptase (RT), protease (PR), and integrase (IN); similar to retroviral genes"; /protein_id="NP_0…	31227..35246	2	FALSE	20031227	20035246
chr2_ref v2	Retrotransposon TYA Gag gene co-transcribed withTYB Pol; translated as TYA or TYA-TYB polyprotein; Gag isa nucleocapsid protein that is the structural constituentof virus-like particles (VLPs); similar to retroviral Gag	CDS	221321..222633	/locus_tag="YBL005W-A"; /inference="non-experimental evidence, no additional details recorded"; /note="Ybl005w-ap"; /codon_start=1; /product="Retrotransposon TYA Gag gene co-transcribed with TYB Pol; translated as TYA or TYA-TYB polyprotein; Gag is a nucleocapsid protein that is the structural constituent of virus-like particles (VLPs); similar to retroviral Gag"; /protein_id="NP_009550.1"; /db_x…	221321..222633	2	FALSE	20221321	20222633
chr2_ref v2	Retrotransposon TYA Gag and TYB Pol genes;transcribed/translated as one unit; polyprotein isprocessed to make a nucleocapsid-like protein (Gag),reverse transcriptase (RT), protease (PR), and integrase(IN); similar to retroviral genes_left	CDS	221321..222615	/locus_tag="YBL005W-B"; /inference="non-experimental evidence, no additional details recorded"; /note="Ybl005w-bp"; /codon_start=1; /product="Retrotransposon TYA Gag and TYB Pol genes; transcribed/translated as one unit; polyprotein is processed to make a nucleocapsid-like protein (Gag), reverse transcriptase (RT), protease (PR), and integrase (IN); similar to retroviral genes"; /protein_id="NP_0…	221321..222615	2	FALSE	20221321	20222615
chr2_ref v2	Retrotransposon TYA Gag and TYB Pol genes;transcribed/translated as one unit; polyprotein isprocessed to make a nucleocapsid-like protein (Gag),reverse transcriptase (RT), protease (PR), and integrase(IN); similar to retroviral genes_right	CDS	222617..226579	/locus_tag="YBL005W-B"; /inference="non-experimental evidence, no additional details recorded"; /note="Ybl005w-bp"; /codon_start=1; /product="Retrotransposon TYA Gag and TYB Pol genes; transcribed/translated as one unit; polyprotein is processed to make a nucleocapsid-like protein (Gag), reverse transcriptase (RT), protease (PR), and integrase (IN); similar to retroviral genes"; /protein_id="NP_0…	222617..226579	2	FALSE	20222617	20226579
chr2_ref v2	Retrotransposon TYA Gag gene co-transcribed withTYB Pol; translated as TYA or TYA-TYB polyprotein; Gag isa nucleocapsid protein that is the structural constituentof virus-like particles (VLPs); similar to retroviral Gag	CDS	259850..261172	/locus_tag="YBR012W-A"; /inference="non-experimental evidence, no additional details recorded"; /note="Ybr012w-ap"; /codon_start=1; /product="Retrotransposon TYA Gag gene co-transcribed with TYB Pol; translated as TYA or TYA-TYB polyprotein; Gag is a nucleocapsid protein that is the structural constituent of virus-like particles (VLPs); similar to retroviral Gag"; /protein_id="NP_009568.1"; /db_x…	259850..261172	2	FALSE	20259850	20261172
chr2_ref v2	Retrotransposon TYA Gag and TYB Pol genes;transcribed/translated as one unit; polyprotein isprocessed to make a nucleocapsid-like protein (Gag),reverse transcriptase (RT), protease (PR), and integrase(IN); similar to retroviral genes_left	CDS	259850..261154	/locus_tag="YBR012W-B"; /inference="non-experimental evidence, no additional details recorded"; /note="Ybr012w-bp"; /codon_start=1; /product="Retrotransposon TYA Gag and TYB Pol genes; transcribed/translated as one unit; polyprotein is processed to make a nucleocapsid-like protein (Gag), reverse transcriptase (RT), protease (PR), and integrase (IN); similar to retroviral genes"; /protein_id="NP_0…	259850..261154	2	FALSE	20259850	20261154
chr2_ref v2	Retrotransposon TYA Gag and TYB Pol genes;transcribed/translated as one unit; polyprotein isprocessed to make a nucleocapsid-like protein (Gag),reverse transcriptase (RT), protease (PR), and integrase(IN); similar to retroviral genes_right	CDS	261156..265119	/locus_tag="YBR012W-B"; /inference="non-experimental evidence, no additional details recorded"; /note="Ybr012w-bp"; /codon_start=1; /product="Retrotransposon TYA Gag and TYB Pol genes; transcribed/translated as one unit; polyprotein is processed to make a nucleocapsid-like protein (Gag), reverse transcriptase (RT), protease (PR), and integrase (IN); similar to retroviral genes"; /protein_id="NP_0…	261156..265119	2	FALSE	20261156	20265119
chr3_ref v2	Retrotransposon TYA Gag gene co-transcribed withTYB Pol; translated as TYA or TYA-TYB polyprotein; Gag isa nucleocapsid protein that is the structural constituentof virus-like particles (VLPs); similar to retroviral Gag	CDS	84983..86299	/locus_tag="YCL020W"; /inference="non-experimental evidence, no additional details recorded"; /note="Ycl020wp"; /codon_start=1; /product="Retrotransposon TYA Gag gene co-transcribed with TYB Pol; translated as TYA or TYA-TYB polyprotein; Gag is a nucleocapsid protein that is the structural constituent of virus-like particles (VLPs); similar to retroviral Gag"; /protein_id="NP_009910.2"; /db_xref=…	84983..86299	3	FALSE	30084983	30086299
chr3_ref v2	Retrotransposon TYA Gag and TYB Pol genes;transcribed/translated as one unit; polyprotein isprocessed to make a nucleocapsid-like protein (Gag),reverse transcriptase (RT), protease (PR), and integrase(IN); similar to retroviral genes_left	CDS	84983..86272	/locus_tag="YCL019W"; /inference="non-experimental evidence, no additional details recorded"; /note="Ycl019wp"; /codon_start=1; /product="Retrotransposon TYA Gag and TYB Pol genes; transcribed/translated as one unit; polyprotein is processed to make a nucleocapsid-like protein (Gag), reverse transcriptase (RT), protease (PR), and integrase (IN); similar to retroviral genes"; /protein_id="NP_00990…	84983..86272	3	FALSE	30084983	30086272
chr3_ref v2	Retrotransposon TYA Gag and TYB Pol genes;transcribed/translated as one unit; polyprotein isprocessed to make a nucleocapsid-like protein (Gag),reverse transcriptase (RT), protease (PR), and integrase(IN); similar to retroviral genes_right	CDS	86274..90296	/locus_tag="YCL019W"; /inference="non-experimental evidence, no additional details recorded"; /note="Ycl019wp"; /codon_start=1; /product="Retrotransposon TYA Gag and TYB Pol genes; transcribed/translated as one unit; polyprotein is processed to make a nucleocapsid-like protein (Gag), reverse transcriptase (RT), protease (PR), and integrase (IN); similar to retroviral genes"; /protein_id="NP_00990…	86274..90296	3	FALSE	30086274	30090296
chr3_ref v2	Putative protein of unknown function; greenfluorescent protein (GFP)-fusion protein localizes to thecytoplasm and nucleus; contains ankyrin (Ank) repeats;YCR051W is not an essential gene	CDS	209901..210569	/locus_tag="YCR051W"; /inference="non-experimental evidence, no additional details recorded"; /note="Ycr051wp"; /codon_start=1; /product="Putative protein of unknown function; green fluorescent protein (GFP)-fusion protein localizes to the cytoplasm and nucleus; contains ankyrin (Ank) repeats; YCR051W is not an essential gene"; /protein_id="NP_009980.1"; /db_xref="GI:6319899"; /db_xref="SGD:S0000…	209901..210569	3	FALSE	30209901	30210569
chr4_ref v2	Putative protein of unknown function; proteinsequence contains three WD domains (WD-40 repeat); greenfluorescent protein (GFP)-fusion protein localizes to thecytoplasm and nucleus	CDS	174857..176425	/locus_tag="YDL156W"; /inference="non-experimental evidence, no additional details recorded"; /note="Ydl156wp"; /codon_start=1; /product="Putative protein of unknown function; protein sequence contains three WD domains (WD-40 repeat); green fluorescent protein (GFP)-fusion protein localizes to the cytoplasm and nucleus"; /protein_id="NP_010125.1"; /db_xref="GI:6320045"; /db_xref="SGD:S000002315";…	174857..176425	4	FALSE	40174857	40176425
chr4_ref v2	Protein of unknown function that may interactwith ribosomes, based on co-purification experiments;Myb-like DNA-binding protein that may bind to the Terregion of rDNA; interacts physically with Fob1p	CDS	complement(492495..494207)	/locus_tag="YDR026C"; /inference="non-experimental evidence, no additional details recorded"; /note="Ydr026cp"; /codon_start=1; /product="Protein of unknown function that may interact with ribosomes, based on co-purification experiments; Myb-like DNA-binding protein that may bind to the Ter region of rDNA; interacts physically with Fob1p"; /protein_id="NP_010309.1"; /db_xref="GI:6320229"; /db_xre…	492495..494207	4	TRUE	40492495	40494207
chr4_ref v2	Retrotransposon TYA Gag and TYB Pol genes;transcribed/translated as one unit; polyprotein isprocessed to make a nucleocapsid-like protein (Gag),reverse transcriptase (RT), protease (PR), and integrase(IN); similar to retroviral genes_left	CDS	complement(513982..518001)	/locus_tag="YDR034C-D"; /inference="non-experimental evidence, no additional details recorded"; /note="Ydr034c-dp"; /codon_start=1; /product="Retrotransposon TYA Gag and TYB Pol genes; transcribed/translated as one unit; polyprotein is processed to make a nucleocapsid-like protein (Gag), reverse transcriptase (RT), protease (PR), and integrase (IN); similar to retroviral genes"; /protein_id="NP_0…	513982..518001	4	TRUE	40513982	40518001
chr4_ref v2	Retrotransposon TYA Gag gene co-transcribed withTYB Pol; translated as TYA or TYA-TYB polyprotein; Gag isa nucleocapsid protein that is the structural constituentof virus-like particles (VLPs); similar to retroviral Gag	CDS	complement(517979..519295)	/locus_tag="YDR034C-C"; /inference="non-experimental evidence, no additional details recorded"; /note="Ydr034c-cp"; /codon_start=1; /product="Retrotransposon TYA Gag gene co-transcribed with TYB Pol; translated as TYA or TYA-TYB polyprotein; Gag is a nucleocapsid protein that is the structural constituent of virus-like particles (VLPs); similar to retroviral Gag"; /protein_id="NP_058139.1"; /db_x…	517979..519295	4	TRUE	40517979	40519295
chr4_ref v2	Retrotransposon TYA Gag and TYB Pol genes;transcribed/translated as one unit; polyprotein isprocessed to make a nucleocapsid-like protein (Gag),reverse transcriptase (RT), protease (PR), and integrase(IN); similar to retroviral genes_right	CDS	complement(518003..519295)	/locus_tag="YDR034C-D"; /inference="non-experimental evidence, no additional details recorded"; /note="Ydr034c-dp"; /codon_start=1; /product="Retrotransposon TYA Gag and TYB Pol genes; transcribed/translated as one unit; polyprotein is processed to make a nucleocapsid-like protein (Gag), reverse transcriptase (RT), protease (PR), and integrase (IN); similar to retroviral genes"; /protein_id="NP_0…	518003..519295	4	TRUE	40518003	40519295
chr4_ref v2	Retrotransposon TYA Gag and TYB Pol genes;transcribed/translated as one unit; polyprotein isprocessed to make a nucleocapsid-like protein (Gag),reverse transcriptase (RT), protease (PR), and integrase(IN); similar to retroviral genes_left	CDS	complement(645773..649735)	/locus_tag="YDR098C-B"; /inference="non-experimental evidence, no additional details recorded"; /note="Ydr098c-bp"; /codon_start=1; /product="Retrotransposon TYA Gag and TYB Pol genes; transcribed/translated as one unit; polyprotein is processed to make a nucleocapsid-like protein (Gag), reverse transcriptase (RT), protease (PR), and integrase (IN); similar to retroviral genes"; /protein_id="NP_0…	645773..649735	4	TRUE	40645773	40649735
chr4_ref v2	Retrotransposon TYA Gag gene co-transcribed withTYB Pol; translated as TYA or TYA-TYB polyprotein; Gag isa nucleocapsid protein that is the structural constituentof virus-like particles (VLPs); similar to retroviral Gag	CDS	complement(649719..651041)	/locus_tag="YDR098C-A"; /inference="non-experimental evidence, no additional details recorded"; /note="Ydr098c-ap"; /codon_start=1; /product="Retrotransposon TYA Gag gene co-transcribed with TYB Pol; translated as TYA or TYA-TYB polyprotein; Gag is a nucleocapsid protein that is the structural constituent of virus-like particles (VLPs); similar to retroviral Gag"; /protein_id="NP_058141.1"; /db_x…	649719..651041	4	TRUE	40649719	40651041
chr4_ref v2	Retrotransposon TYA Gag and TYB Pol genes;transcribed/translated as one unit; polyprotein isprocessed to make a nucleocapsid-like protein (Gag),reverse transcriptase (RT), protease (PR), and integrase(IN); similar to retroviral genes_right	CDS	complement(649737..651041)	/locus_tag="YDR098C-B"; /inference="non-experimental evidence, no additional details recorded"; /note="Ydr098c-bp"; /codon_start=1; /product="Retrotransposon TYA Gag and TYB Pol genes; transcribed/translated as one unit; polyprotein is processed to make a nucleocapsid-like protein (Gag), reverse transcriptase (RT), protease (PR), and integrase (IN); similar to retroviral genes"; /protein_id="NP_0…	649737..651041	4	TRUE	40649737	40651041
chr4_ref v2	Retrotransposon TYA Gag gene; Gag is anucleocapsid protein that is the structural constituent ofvirus-like particles (VLPs); similar to retroviral Gag;YDR170W-A is part of a mutant retrotransposon	CDS	803096..804418	/locus_tag="YDR170W-A"; /inference="non-experimental evidence, no additional details recorded"; /note="Ydr170w-ap"; /codon_start=1; /product="Retrotransposon TYA Gag gene; Gag is a nucleocapsid protein that is the structural constituent of virus-like particles (VLPs); similar to retroviral Gag; YDR170W-A is part of a mutant retrotransposon"; /protein_id="NP_010455.1"; /db_xref="GI:6320375"; /db_x…	803096..804418	4	FALSE	40803096	40804418
chr4_ref v2	Retrotransposon TYA Gag gene co-transcribed withTYB Pol; translated as TYA or TYA-TYB polyprotein; Gag isa nucleocapsid protein that is the structural constituentof virus-like particles (VLPs); similar to retroviral Gag	CDS	872014..873330	/locus_tag="YDR210W-A"; /inference="non-experimental evidence, no additional details recorded"; /note="Ydr210w-ap"; /codon_start=1; /product="Retrotransposon TYA Gag gene co-transcribed with TYB Pol; translated as TYA or TYA-TYB polyprotein; Gag is a nucleocapsid protein that is the structural constituent of virus-like particles (VLPs); similar to retroviral Gag"; /protein_id="NP_058143.1"; /db_x…	872014..873330	4	FALSE	40872014	40873330
chr4_ref v2	Retrotransposon TYA Gag and TYB Pol genes;transcribed/translated as one unit; polyprotein isprocessed to make a nucleocapsid-like protein (Gag),reverse transcriptase (RT), protease (PR), and integrase(IN); similar to retroviral genes_left	CDS	872014..873306	/locus_tag="YDR210W-B"; /inference="non-experimental evidence, no additional details recorded"; /note="Ydr210w-bp"; /codon_start=1; /product="Retrotransposon TYA Gag and TYB Pol genes; transcribed/translated as one unit; polyprotein is processed to make a nucleocapsid-like protein (Gag), reverse transcriptase (RT), protease (PR), and integrase (IN); similar to retroviral genes"; /protein_id="NP_0…	872014..873306	4	FALSE	40872014	40873306
chr4_ref v2	Retrotransposon TYA Gag and TYB Pol genes;transcribed/translated as one unit; polyprotein isprocessed to make a nucleocapsid-like protein (Gag),reverse transcriptase (RT), protease (PR), and integrase(IN); similar to retroviral genes_right	CDS	873308..877327	/locus_tag="YDR210W-B"; /inference="non-experimental evidence, no additional details recorded"; /note="Ydr210w-bp"; /codon_start=1; /product="Retrotransposon TYA Gag and TYB Pol genes; transcribed/translated as one unit; polyprotein is processed to make a nucleocapsid-like protein (Gag), reverse transcriptase (RT), protease (PR), and integrase (IN); similar to retroviral genes"; /protein_id="NP_0…	873308..877327	4	FALSE	40873308	40877327
chr4_ref v2	Retrotransposon TYA Gag and TYB Pol genes;transcribed/translated as one unit; polyprotein isprocessed to make a nucleocapsid-like protein (Gag),reverse transcriptase (RT), protease (PR), and integrase(IN); similar to retroviral genes_left	CDS	complement(878561..882523)	/locus_tag="YDR210C-D"; /inference="non-experimental evidence, no additional details recorded"; /note="Ydr210c-dp"; /codon_start=1; /product="Retrotransposon TYA Gag and TYB Pol genes; transcribed/translated as one unit; polyprotein is processed to make a nucleocapsid-like protein (Gag), reverse transcriptase (RT), protease (PR), and integrase (IN); similar to retroviral genes"; /protein_id="NP_6…	878561..882523	4	TRUE	40878561	40882523
chr4_ref v2	Retrotransposon TYA Gag gene co-transcribed withTYB Pol; translated as TYA or TYA-TYB polyprotein; Gag isa nucleocapsid protein that is the structural constituentof virus-like particles (VLPs); similar to retroviral Gag	CDS	complement(882507..883829)	/locus_tag="YDR210C-C"; /inference="non-experimental evidence, no additional details recorded"; /note="Ydr210c-cp"; /codon_start=1; /product="Retrotransposon TYA Gag gene co-transcribed with TYB Pol; translated as TYA or TYA-TYB polyprotein; Gag is a nucleocapsid protein that is the structural constituent of virus-like particles (VLPs); similar to retroviral Gag"; /protein_id="NP_620388.1"; /db_x…	882507..883829	4	TRUE	40882507	40883829
chr4_ref v2	Retrotransposon TYA Gag and TYB Pol genes;transcribed/translated as one unit; polyprotein isprocessed to make a nucleocapsid-like protein (Gag),reverse transcriptase (RT), protease (PR), and integrase(IN); similar to retroviral genes_right	CDS	complement(882525..883829)	/locus_tag="YDR210C-D"; /inference="non-experimental evidence, no additional details recorded"; /note="Ydr210c-dp"; /codon_start=1; /product="Retrotransposon TYA Gag and TYB Pol genes; transcribed/translated as one unit; polyprotein is processed to make a nucleocapsid-like protein (Gag), reverse transcriptase (RT), protease (PR), and integrase (IN); similar to retroviral genes"; /protein_id="NP_6…	882525..883829	4	TRUE	40882525	40883829
chr4_ref v2	Retrotransposon TYA Gag gene co-transcribed withTYB Pol; translated as TYA or TYA-TYB polyprotein; Gag isa nucleocapsid protein that is the structural constituentof virus-like particles (VLPs); similar to retroviral Gag	CDS	981364..982680	/locus_tag="YDR261W-A"; /inference="non-experimental evidence, no additional details recorded"; /note="Ydr261w-ap"; /codon_start=1; /product="Retrotransposon TYA Gag gene co-transcribed with TYB Pol; translated as TYA or TYA-TYB polyprotein; Gag is a nucleocapsid protein that is the structural constituent of virus-like particles (VLPs); similar to retroviral Gag"; /protein_id="NP_058147.1"; /db_x…	981364..982680	4	FALSE	40981364	40982680
chr4_ref v2	Retrotransposon TYA Gag and TYB Pol genes;transcribed/translated as one unit; polyprotein isprocessed to make a nucleocapsid-like protein (Gag),reverse transcriptase (RT), protease (PR), and integrase(IN); similar to retroviral genes_left	CDS	981364..982656	/locus_tag="YDR261W-B"; /inference="non-experimental evidence, no additional details recorded"; /note="Ydr261w-bp"; /codon_start=1; /product="Retrotransposon TYA Gag and TYB Pol genes; transcribed/translated as one unit; polyprotein is processed to make a nucleocapsid-like protein (Gag), reverse transcriptase (RT), protease (PR), and integrase (IN); similar to retroviral genes"; /protein_id="NP_0…	981364..982656	4	FALSE	40981364	40982656
chr4_ref v2	Retrotransposon TYA Gag and TYB Pol genes;transcribed/translated as one unit; polyprotein isprocessed to make a nucleocapsid-like protein (Gag),reverse transcriptase (RT), protease (PR), and integrase(IN); similar to retroviral genes_right	CDS	982658..986677	/locus_tag="YDR261W-B"; /inference="non-experimental evidence, no additional details recorded"; /note="Ydr261w-bp"; /codon_start=1; /product="Retrotransposon TYA Gag and TYB Pol genes; transcribed/translated as one unit; polyprotein is processed to make a nucleocapsid-like protein (Gag), reverse transcriptase (RT), protease (PR), and integrase (IN); similar to retroviral genes"; /protein_id="NP_0…	982658..986677	4	FALSE	40982658	40986677
chr4_ref v2	Retrotransposon TYA Gag and TYB Pol genes; inYDRCTY1-3 TYB is mutant and probably non-functional_left	CDS	complement(987436..990945)	/locus_tag="YDR261C-D"; /inference="non-experimental evidence, no additional details recorded"; /note="Ydr261c-dp"; /codon_start=1; /product="Retrotransposon TYA Gag and TYB Pol genes; in YDRCTY1-3 TYB is mutant and probably non-functional"; /protein_id="NP_058148.1"; /db_xref="GI:7839160"; /db_xref="SGD:S000007395"; /db_xref="GeneID:851852"; /translation="MESQQLSQHSPISHGSACASVTSKEVHTNQDPLDVSASKT…	987436..990945	4	TRUE	40987436	40990945
chr4_ref v2	Retrotransposon TYA Gag gene co-transcribed withTYB Pol; in YDRCTY1-3 TYB is mutant and probablynon-functional	CDS	complement(990929..992251)	/locus_tag="YDR261C-C"; /inference="non-experimental evidence, no additional details recorded"; /note="Ydr261c-cp"; /codon_start=1; /product="Retrotransposon TYA Gag gene co-transcribed with TYB Pol; in YDRCTY1-3 TYB is mutant and probably non-functional"; /protein_id="NP_058149.1"; /db_xref="GI:7839159"; /db_xref="SGD:S000007394"; /db_xref="GeneID:851853"; /translation="MESQQLSQHSPISHGSACASVTSKE…	990929..992251	4	TRUE	40990929	40992251
chr4_ref v2	Retrotransposon TYA Gag and TYB Pol genes; inYDRCTY1-3 TYB is mutant and probably non-functional_right	CDS	complement(990947..992251)	/locus_tag="YDR261C-D"; /inference="non-experimental evidence, no additional details recorded"; /note="Ydr261c-dp"; /codon_start=1; /product="Retrotransposon TYA Gag and TYB Pol genes; in YDRCTY1-3 TYB is mutant and probably non-functional"; /protein_id="NP_058148.1"; /db_xref="GI:7839160"; /db_xref="SGD:S000007395"; /db_xref="GeneID:851852"; /translation="MESQQLSQHSPISHGSACASVTSKEVHTNQDPLDVSASKT…	990947..992251	4	TRUE	40990947	40992251
chr4_ref v2	F-box protein of unknown function; interactswith Sgt1p via a Leucine-Rich Repeat (LRR) domain	CDS	complement(1073638..1075074)	/locus_tag="YDR306C"; /inference="non-experimental evidence, no additional details recorded"; /note="Ydr306cp"; /codon_start=1; /product="F-box protein of unknown function; interacts with Sgt1p via a Leucine-Rich Repeat (LRR) domain"; /protein_id="NP_010592.1"; /db_xref="GI:6320512"; /db_xref="SGD:S000002714"; /db_xref="GeneID:851900"; /translation="MANKSRPKKIKAPYRKYVAGEGFSSTRNDNKAKEFTITIPEDAE LI…	1073638..1075074	4	TRUE	41073638	41075074
chr4_ref v2	Retrotransposon TYA Gag gene co-transcribed withTYB Pol; translated as TYA or TYA-TYB polyprotein; Gag isa nucleocapsid protein that is the structural constituentof virus-like particles (VLPs); similar to retroviral Gag	CDS	1095967..1097289	/locus_tag="YDR316W-A"; /inference="non-experimental evidence, no additional details recorded"; /note="Ydr316w-ap"; /codon_start=1; /product="Retrotransposon TYA Gag gene co-transcribed with TYB Pol; translated as TYA or TYA-TYB polyprotein; Gag is a nucleocapsid protein that is the structural constituent of virus-like particles (VLPs); similar to retroviral Gag"; /protein_id="NP_058151.1"; /db_x…	1095967..1097289	4	FALSE	41095967	41097289
chr4_ref v2	Retrotransposon TYA Gag and TYB Pol genes;transcribed/translated as one unit; polyprotein isprocessed to make a nucleocapsid-like protein (Gag),reverse transcriptase (RT), protease (PR), and integrase(IN); similar to retroviral genes_left	CDS	1095967..1097271	/locus_tag="YDR316W-B"; /inference="non-experimental evidence, no additional details recorded"; /note="Ydr316w-bp"; /codon_start=1; /product="Retrotransposon TYA Gag and TYB Pol genes; transcribed/translated as one unit; polyprotein is processed to make a nucleocapsid-like protein (Gag), reverse transcriptase (RT), protease (PR), and integrase (IN); similar to retroviral genes"; /protein_id="NP_0…	1095967..1097271	4	FALSE	41095967	41097271
chr4_ref v2	Retrotransposon TYA Gag and TYB Pol genes;transcribed/translated as one unit; polyprotein isprocessed to make a nucleocapsid-like protein (Gag),reverse transcriptase (RT), protease (PR), and integrase(IN); similar to retroviral genes_right	CDS	1097273..1101235	/locus_tag="YDR316W-B"; /inference="non-experimental evidence, no additional details recorded"; /note="Ydr316w-bp"; /codon_start=1; /product="Retrotransposon TYA Gag and TYB Pol genes; transcribed/translated as one unit; polyprotein is processed to make a nucleocapsid-like protein (Gag), reverse transcriptase (RT), protease (PR), and integrase (IN); similar to retroviral genes"; /protein_id="NP_0…	1097273..1101235	4	FALSE	41097273	41101235
chr4_ref v2	Retrotransposon TYA Gag gene co-transcribed withTYB Pol; translated as TYA or TYA-TYB polyprotein; Gag isa nucleocapsid protein that is the structural constituentof virus-like particles (VLPs); similar to retroviral Gag	CDS	1206901..1208223	/locus_tag="YDR365W-A"; /inference="non-experimental evidence, no additional details recorded"; /note="Ydr365w-ap"; /codon_start=1; /product="Retrotransposon TYA Gag gene co-transcribed with TYB Pol; translated as TYA or TYA-TYB polyprotein; Gag is a nucleocapsid protein that is the structural constituent of virus-like particles (VLPs); similar to retroviral Gag"; /protein_id="NP_058153.1"; /db_x…	1206901..1208223	4	FALSE	41206901	41208223
chr4_ref v2	Retrotransposon TYA Gag and TYB Pol genes;transcribed/translated as one unit; polyprotein isprocessed to make a nucleocapsid-like protein (Gag),reverse transcriptase (RT), protease (PR), and integrase(IN); similar to retroviral genes_left	CDS	1206901..1208205	/locus_tag="YDR365W-B"; /inference="non-experimental evidence, no additional details recorded"; /note="Ydr365w-bp"; /codon_start=1; /product="Retrotransposon TYA Gag and TYB Pol genes; transcribed/translated as one unit; polyprotein is processed to make a nucleocapsid-like protein (Gag), reverse transcriptase (RT), protease (PR), and integrase (IN); similar to retroviral genes"; /protein_id="NP_0…	1206901..1208205	4	FALSE	41206901	41208205
chr4_ref v2	Retrotransposon TYA Gag and TYB Pol genes;transcribed/translated as one unit; polyprotein isprocessed to make a nucleocapsid-like protein (Gag),reverse transcriptase (RT), protease (PR), and integrase(IN); similar to retroviral genes_right	CDS	1208207..1212169	/locus_tag="YDR365W-B"; /inference="non-experimental evidence, no additional details recorded"; /note="Ydr365w-bp"; /codon_start=1; /product="Retrotransposon TYA Gag and TYB Pol genes; transcribed/translated as one unit; polyprotein is processed to make a nucleocapsid-like protein (Gag), reverse transcriptase (RT), protease (PR), and integrase (IN); similar to retroviral genes"; /protein_id="NP_0…	1208207..1212169	4	FALSE	41208207	41212169
chr5_ref v2	Retrotransposon TYA Gag and TYB Pol genes;transcribed/translated as one unit; polyprotein isprocessed to make a nucleocapsid-like protein (Gag),reverse transcriptase (RT), protease (PR), and integrase(IN); similar to retroviral genes_left	CDS	complement(442601..446566)	/locus_tag="YER138C"; /inference="non-experimental evidence, no additional details recorded"; /note="Yer138cp"; /codon_start=1; /product="Retrotransposon TYA Gag and TYB Pol genes; transcribed/translated as one unit; polyprotein is processed to make a nucleocapsid-like protein (Gag), reverse transcriptase (RT), protease (PR), and integrase (IN); similar to retroviral genes"; /protein_id="NP_01106…	442601..446566	5	TRUE	50442601	50446566
chr5_ref v2	Retrotransposon TYA Gag gene co-transcribed withTYB Pol; translated as TYA or TYA-TYB polyprotein; Gag isa nucleocapsid protein that is the structural constituentof virus-like particles (VLPs); similar to retroviral Gag	CDS	complement(446547..447869)	/locus_tag="YER137C-A"; /inference="non-experimental evidence, no additional details recorded"; /note="Yer137c-ap"; /codon_start=1; /product="Retrotransposon TYA Gag gene co-transcribed with TYB Pol; translated as TYA or TYA-TYB polyprotein; Gag is a nucleocapsid protein that is the structural constituent of virus-like particles (VLPs); similar to retroviral Gag"; /protein_id="NP_058155.1"; /db_x…	446547..447869	5	TRUE	50446547	50447869
chr5_ref v2	Retrotransposon TYA Gag and TYB Pol genes;transcribed/translated as one unit; polyprotein isprocessed to make a nucleocapsid-like protein (Gag),reverse transcriptase (RT), protease (PR), and integrase(IN); similar to retroviral genes_right	CDS	complement(446568..447869)	/locus_tag="YER138C"; /inference="non-experimental evidence, no additional details recorded"; /note="Yer138cp"; /codon_start=1; /product="Retrotransposon TYA Gag and TYB Pol genes; transcribed/translated as one unit; polyprotein is processed to make a nucleocapsid-like protein (Gag), reverse transcriptase (RT), protease (PR), and integrase (IN); similar to retroviral genes"; /protein_id="NP_01106…	446568..447869	5	TRUE	50446568	50447869
chr5_ref v2	Retrotransposon TYA Gag and TYB Pol genes;transcribed/translated as one unit; polyprotein isprocessed to make a nucleocapsid-like protein (Gag),reverse transcriptase (RT), protease (PR), and integrase(IN); similar to retroviral genes_left	CDS	complement(491701..495666)	/locus_tag="YER160C"; /inference="non-experimental evidence, no additional details recorded"; /note="Yer160cp"; /codon_start=1; /product="Retrotransposon TYA Gag and TYB Pol genes; transcribed/translated as one unit; polyprotein is processed to make a nucleocapsid-like protein (Gag), reverse transcriptase (RT), protease (PR), and integrase (IN); similar to retroviral genes"; /protein_id="NP_01108…	491701..495666	5	TRUE	50491701	50495666
chr5_ref v2	Retrotransposon TYA Gag gene co-transcribed withTYB Pol; translated as TYA or TYA-TYB polyprotein; Gag isa nucleocapsid protein that is the structural constituentof virus-like particles (VLPs); similar to retroviral Gag	CDS	complement(495647..496969)	/locus_tag="YER159C-A"; /inference="non-experimental evidence, no additional details recorded"; /note="Yer159c-ap"; /codon_start=1; /product="Retrotransposon TYA Gag gene co-transcribed with TYB Pol; translated as TYA or TYA-TYB polyprotein; Gag is a nucleocapsid protein that is the structural constituent of virus-like particles (VLPs); similar to retroviral Gag"; /protein_id="NP_058156.1"; /db_x…	495647..496969	5	TRUE	50495647	50496969
chr5_ref v2	Retrotransposon TYA Gag and TYB Pol genes;transcribed/translated as one unit; polyprotein isprocessed to make a nucleocapsid-like protein (Gag),reverse transcriptase (RT), protease (PR), and integrase(IN); similar to retroviral genes_right	CDS	complement(495668..496969)	/locus_tag="YER160C"; /inference="non-experimental evidence, no additional details recorded"; /note="Yer160cp"; /codon_start=1; /product="Retrotransposon TYA Gag and TYB Pol genes; transcribed/translated as one unit; polyprotein is processed to make a nucleocapsid-like protein (Gag), reverse transcriptase (RT), protease (PR), and integrase (IN); similar to retroviral genes"; /protein_id="NP_01108…	495668..496969	5	TRUE	50495668	50496969
chr6_ref v2	Retrotransposon TYA Gag gene co-transcribed withTYB Pol; translated as TYA or TYA-TYB polyprotein; Gag isa nucleocapsid protein that is the structural constituentof virus-like particles (VLPs); similar to retroviral Gag	CDS	138206..139522	/locus_tag="YFL002W-B"; /inference="non-experimental evidence, no additional details recorded"; /note="Yfl002w-bp"; /codon_start=1; /product="Retrotransposon TYA Gag gene co-transcribed with TYB Pol; translated as TYA or TYA-TYB polyprotein; Gag is a nucleocapsid protein that is the structural constituent of virus-like particles (VLPs); similar to retroviral Gag"; /protein_id="NP_058157.1"; /db_x…	138206..139522	6	FALSE	60138206	60139522
chr6_ref v2	Retrotransposon TYA Gag and TYB Pol genes;transcribed/translated as one unit; polyprotein isprocessed to make a nucleocapsid-like protein (Gag),reverse transcriptase (RT), protease (PR), and integrase(IN); similar to retroviral genes_left	CDS	138206..139498	/locus_tag="YFL002W-A"; /inference="non-experimental evidence, no additional details recorded"; /note="Yfl002w-ap"; /codon_start=1; /product="Retrotransposon TYA Gag and TYB Pol genes; transcribed/translated as one unit; polyprotein is processed to make a nucleocapsid-like protein (Gag), reverse transcriptase (RT), protease (PR), and integrase (IN); similar to retroviral genes"; /protein_id="NP_1…	138206..139498	6	FALSE	60138206	60139498
chr6_ref v2	Retrotransposon TYA Gag and TYB Pol genes;transcribed/translated as one unit; polyprotein isprocessed to make a nucleocapsid-like protein (Gag),reverse transcriptase (RT), protease (PR), and integrase(IN); similar to retroviral genes_right	CDS	139500..143519	/locus_tag="YFL002W-A"; /inference="non-experimental evidence, no additional details recorded"; /note="Yfl002w-ap"; /codon_start=1; /product="Retrotransposon TYA Gag and TYB Pol genes; transcribed/translated as one unit; polyprotein is processed to make a nucleocapsid-like protein (Gag), reverse transcriptase (RT), protease (PR), and integrase (IN); similar to retroviral genes"; /protein_id="NP_1…	139500..143519	6	FALSE	60139500	60143519
chr7_ref v2	Retrotransposon TYA Gag gene co-transcribed withTYB Pol; translated as TYA or TYA-TYB polyprotein; Gag isa nucleocapsid protein that is the structural constituentof virus-like particles (VLPs); similar to retroviral Gag	CDS	536046..537368	/locus_tag="YGR027W-A"; /inference="non-experimental evidence, no additional details recorded"; /GO_component="retrotransposon nucleocapsid [PMID 9582191]"; /GO_function="protein binding [PMID 9582191]; RNA binding [PMID 9582191]"; /GO_process="transposition, DNA-mediated; transposition, RNA-mediated [PMID 9582191]"; /note="Ygr027w-ap"; /codon_start=1; /product="Retrotransposon TYA Gag gene co-tr…	536046..537368	7	FALSE	70536046	70537368
chr7_ref v2	Retrotransposon TYA Gag and TYB Pol genes;transcribed/translated as one unit; polyprotein isprocessed to make a nucleocapsid-like protein (Gag),reverse transcriptase (RT), protease (PR), and integrase(IN); similar to retroviral genes_left	CDS	536046..537350	/locus_tag="YGR027W-B"; /inference="non-experimental evidence, no additional details recorded"; /GO_component="nucleus; retrotransposon nucleocapsid [PMID 9582191]"; /GO_function="aspartic-type endopeptidase activity; ATP binding; catalytic activity; DNA binding; DNA-directed DNA polymerase activity [PMID 9582191]; endonuclease activity; hydrolase activity; magnesium ion binding; metal ion bindin…	536046..537350	7	FALSE	70536046	70537350
chr7_ref v2	Retrotransposon TYA Gag and TYB Pol genes;transcribed/translated as one unit; polyprotein isprocessed to make a nucleocapsid-like protein (Gag),reverse transcriptase (RT), protease (PR), and integrase(IN); similar to retroviral genes_right	CDS	537352..541314	/locus_tag="YGR027W-B"; /inference="non-experimental evidence, no additional details recorded"; /GO_component="nucleus; retrotransposon nucleocapsid [PMID 9582191]"; /GO_function="aspartic-type endopeptidase activity; ATP binding; catalytic activity; DNA binding; DNA-directed DNA polymerase activity [PMID 9582191]; endonuclease activity; hydrolase activity; magnesium ion binding; metal ion bindin…	537352..541314	7	FALSE	70537352	70541314
chr7_ref v2	Retrotransposon TYA Gag and TYB Pol genes;transcribed/translated as one unit; polyprotein isprocessed to make a nucleocapsid-like protein (Gag),reverse transcriptase (RT), protease (PR), and integrase(IN); similar to retroviral genes_left	CDS	complement(562188..566150)	/locus_tag="YGR038C-B"; /inference="non-experimental evidence, no additional details recorded"; /GO_component="nucleus; retrotransposon nucleocapsid [PMID 9582191]"; /GO_function="aspartic-type endopeptidase activity; ATP binding; catalytic activity; DNA binding; DNA-directed DNA polymerase activity [PMID 9582191]; endonuclease activity; hydrolase activity; magnesium ion binding; metal ion bindin…	562188..566150	7	TRUE	70562188	70566150
chr7_ref v2	Retrotransposon TYA Gag gene co-transcribed withTYB Pol; translated as TYA or TYA-TYB polyprotein; Gag isa nucleocapsid protein that is the structural constituentof virus-like particles (VLPs); similar to retroviral Gag	CDS	complement(566134..567456)	/locus_tag="YGR038C-A"; /inference="non-experimental evidence, no additional details recorded"; /GO_component="retrotransposon nucleocapsid [PMID 9582191]"; /GO_function="protein binding [PMID 9582191]; RNA binding [PMID 9582191]"; /GO_process="transposition, DNA-mediated; transposition, RNA-mediated [PMID 9582191]"; /note="Ygr038c-ap"; /codon_start=1; /product="Retrotransposon TYA Gag gene co-tr…	566134..567456	7	TRUE	70566134	70567456
chr7_ref v2	Retrotransposon TYA Gag and TYB Pol genes;transcribed/translated as one unit; polyprotein isprocessed to make a nucleocapsid-like protein (Gag),reverse transcriptase (RT), protease (PR), and integrase(IN); similar to retroviral genes_right	CDS	complement(566152..567456)	/locus_tag="YGR038C-B"; /inference="non-experimental evidence, no additional details recorded"; /GO_component="nucleus; retrotransposon nucleocapsid [PMID 9582191]"; /GO_function="aspartic-type endopeptidase activity; ATP binding; catalytic activity; DNA binding; DNA-directed DNA polymerase activity [PMID 9582191]; endonuclease activity; hydrolase activity; magnesium ion binding; metal ion bindin…	566152..567456	7	TRUE	70566152	70567456
chr7_ref v2	Putative protein of unknown function; transposoninsertion mutant is salt sensitive and deletion mutant hasgrowth defects; the authentic, non-tagged protein isdetected in highly purified mitochondria inhigh-throughput studies	CDS	complement(694573..695124)	/locus_tag="YGR102C"; /inference="non-experimental evidence, no additional details recorded"; /GO_component="mitochondrion [PMID 14562095] [PMID 16823961]"; /GO_function="molecular_function"; /GO_process="biological_process"; /note="Ygr102cp"; /codon_start=1; /product="Putative protein of unknown function; transposon insertion mutant is salt sensitive and deletion mutant has growth defects; the a…	694573..695124	7	TRUE	70694573	70695124
chr7_ref v2	Retrotransposon TYA Gag gene co-transcribed withTYB Pol; translated as TYA or TYA-TYB polyprotein; Gag isa nucleocapsid protein that is the structural constituentof virus-like particles (VLPs); similar to retroviral Gag	CDS	707599..708455	/locus_tag="YGR109W-A"; /inference="non-experimental evidence, no additional details recorded"; /GO_component="retrotransposon nucleocapsid [PMID 9582191]"; /GO_function="metal ion binding; nucleic acid binding; protein binding [PMID 9582191]; RNA binding [PMID 9582191]; zinc ion binding"; /GO_process="transposition, DNA-mediated; transposition, RNA-mediated [PMID 9582191]"; /note="Ygr109w-ap"; /…	707599..708455	7	FALSE	70707599	70708455
chr7_ref v2	Retrotransposon TYA Gag and TYB Pol genes;transcribed/translated as one unit; polyprotein isprocessed to make a nucleocapsid-like protein (Gag),reverse transcriptase (RT), protease (PR), and integrase(IN); similar to retroviral genes_left	CDS	707599..708432	/locus_tag="YGR109W-B"; /inference="non-experimental evidence, no additional details recorded"; /GO_component="nucleus; retrotransposon nucleocapsid [PMID 9582191]"; /GO_function="aspartic-type endopeptidase activity; ATP binding; catalytic activity; DNA binding; DNA-directed DNA polymerase activity [PMID 9582191]; endonuclease activity; hydrolase activity; magnesium ion binding; metal ion bindin…	707599..708432	7	FALSE	70707599	70708432
chr7_ref v2	Retrotransposon TYA Gag and TYB Pol genes;transcribed/translated as one unit; polyprotein isprocessed to make a nucleocapsid-like protein (Gag),reverse transcriptase (RT), protease (PR), and integrase(IN); similar to retroviral genes_right	CDS	708434..712168	/locus_tag="YGR109W-B"; /inference="non-experimental evidence, no additional details recorded"; /GO_component="nucleus; retrotransposon nucleocapsid [PMID 9582191]"; /GO_function="aspartic-type endopeptidase activity; ATP binding; catalytic activity; DNA binding; DNA-directed DNA polymerase activity [PMID 9582191]; endonuclease activity; hydrolase activity; magnesium ion binding; metal ion bindin…	708434..712168	7	FALSE	70708434	70712168
chr7_ref v2	Retrotransposon TYA Gag gene co-transcribed withTYB Pol; translated as TYA or TYA-TYB polyprotein; Gag isa nucleocapsid protein that is the structural constituentof virus-like particles (VLPs); similar to retroviral Gag	CDS	811652..812968	/locus_tag="YGR161W-A"; /inference="non-experimental evidence, no additional details recorded"; /GO_component="retrotransposon nucleocapsid [PMID 9582191]"; /GO_function="protein binding [PMID 9582191]; RNA binding [PMID 9582191]"; /GO_process="transposition, DNA-mediated; transposition, RNA-mediated [PMID 9582191]"; /note="Ygr161w-ap"; /codon_start=1; /product="Retrotransposon TYA Gag gene co-tr…	811652..812968	7	FALSE	70811652	70812968
chr7_ref v2	Retrotransposon TYA Gag and TYB Pol genes;transcribed/translated as one unit; polyprotein isprocessed to make a nucleocapsid-like protein (Gag),reverse transcriptase (RT), protease (PR), and integrase(IN); similar to retroviral genes_left	CDS	811652..812944	/locus_tag="YGR161W-B"; /inference="non-experimental evidence, no additional details recorded"; /GO_component="nucleus; retrotransposon nucleocapsid [PMID 9582191]"; /GO_function="aspartic-type endopeptidase activity; ATP binding; catalytic activity; DNA binding; DNA-directed DNA polymerase activity [PMID 9582191]; endonuclease activity; hydrolase activity; magnesium ion binding; metal ion bindin…	811652..812944	7	FALSE	70811652	70812944
chr7_ref v2	Retrotransposon TYA Gag and TYB Pol genes;transcribed/translated as one unit; polyprotein isprocessed to make a nucleocapsid-like protein (Gag),reverse transcriptase (RT), protease (PR), and integrase(IN); similar to retroviral genes_right	CDS	812946..816965	/locus_tag="YGR161W-B"; /inference="non-experimental evidence, no additional details recorded"; /GO_component="nucleus; retrotransposon nucleocapsid [PMID 9582191]"; /GO_function="aspartic-type endopeptidase activity; ATP binding; catalytic activity; DNA binding; DNA-directed DNA polymerase activity [PMID 9582191]; endonuclease activity; hydrolase activity; magnesium ion binding; metal ion bindin…	812946..816965	7	FALSE	70812946	70816965
chr7_ref v2	Retrotransposon TYA Gag and TYB Pol genes;transcribed/translated as one unit; polyprotein isprocessed to make a nucleocapsid-like protein (Gag),reverse transcriptase (RT), protease (PR), and integrase(IN); similar to retroviral genes_left	CDS	complement(817661..821623)	/locus_tag="YGR161C-D"; /inference="non-experimental evidence, no additional details recorded"; /GO_component="nucleus; retrotransposon nucleocapsid [PMID 9582191]"; /GO_function="aspartic-type endopeptidase activity; ATP binding; catalytic activity; DNA binding; DNA-directed DNA polymerase activity [PMID 9582191]; endonuclease activity; hydrolase activity; magnesium ion binding; metal ion bindin…	817661..821623	7	TRUE	70817661	70821623
chr7_ref v2	Retrotransposon TYA Gag gene co-transcribed withTYB Pol; translated as TYA or TYA-TYB polyprotein; Gag isa nucleocapsid protein that is the structural constituentof virus-like particles (VLPs); similar to retroviral Gag	CDS	complement(821607..822929)	/locus_tag="YGR161C-C"; /inference="non-experimental evidence, no additional details recorded"; /GO_component="retrotransposon nucleocapsid [PMID 9582191]"; /GO_function="protein binding [PMID 9582191]; RNA binding [PMID 9582191]"; /GO_process="transposition, DNA-mediated; transposition, RNA-mediated [PMID 9582191]"; /note="Ygr161c-cp"; /codon_start=1; /product="Retrotransposon TYA Gag gene co-tr…	821607..822929	7	TRUE	70821607	70822929
chr7_ref v2	Retrotransposon TYA Gag and TYB Pol genes;transcribed/translated as one unit; polyprotein isprocessed to make a nucleocapsid-like protein (Gag),reverse transcriptase (RT), protease (PR), and integrase(IN); similar to retroviral genes_right	CDS	complement(821625..822929)	/locus_tag="YGR161C-D"; /inference="non-experimental evidence, no additional details recorded"; /GO_component="nucleus; retrotransposon nucleocapsid [PMID 9582191]"; /GO_function="aspartic-type endopeptidase activity; ATP binding; catalytic activity; DNA binding; DNA-directed DNA polymerase activity [PMID 9582191]; endonuclease activity; hydrolase activity; magnesium ion binding; metal ion bindin…	821625..822929	7	TRUE	70821625	70822929
chr8_ref v2	Retrotransposon TYA Gag gene co-transcribed withTYB Pol; translated as TYA or TYA-TYB polyprotein; Gag isa nucleocapsid protein that is the structural constituentof virus-like particles (VLPs); similar to retroviral Gag	CDS	85909..87150	/locus_tag="YHL009W-A"; /inference="non-experimental evidence, no additional details recorded"; /note="Yhl009w-ap"; /codon_start=1; /product="Retrotransposon TYA Gag gene co-transcribed with TYB Pol; translated as TYA or TYA-TYB polyprotein; Gag is a nucleocapsid protein that is the structural constituent of virus-like particles (VLPs); similar to retroviral Gag"; /protein_id="NP_058134.1"; /db_x…	85909..87150	8	FALSE	80085909	80087150
chr8_ref v2	Retrotransposon TYA Gag and TYB Pol genes;transcribed/translated as one unit; polyprotein isprocessed to make a nucleocapsid-like protein (Gag),reverse transcriptase (RT), protease (PR), and integrase(IN); similar to retroviral genes_left	CDS	85909..86994	/locus_tag="YHL009W-B"; /inference="non-experimental evidence, no additional details recorded"; /note="Yhl009w-bp"; /codon_start=1; /product="Retrotransposon TYA Gag and TYB Pol genes; transcribed/translated as one unit; polyprotein is processed to make a nucleocapsid-like protein (Gag), reverse transcriptase (RT), protease (PR), and integrase (IN); similar to retroviral genes"; /protein_id="NP_0…	85909..86994	8	FALSE	80085909	80086994
chr8_ref v2	Retrotransposon TYA Gag and TYB Pol genes;transcribed/translated as one unit; polyprotein isprocessed to make a nucleocapsid-like protein (Gag),reverse transcriptase (RT), protease (PR), and integrase(IN); similar to retroviral genes_right	CDS	86996..91318	/locus_tag="YHL009W-B"; /inference="non-experimental evidence, no additional details recorded"; /note="Yhl009w-bp"; /codon_start=1; /product="Retrotransposon TYA Gag and TYB Pol genes; transcribed/translated as one unit; polyprotein is processed to make a nucleocapsid-like protein (Gag), reverse transcriptase (RT), protease (PR), and integrase (IN); similar to retroviral genes"; /protein_id="NP_0…	86996..91318	8	FALSE	80086996	80091318
chr8_ref v2	Retrotransposon TYA Gag and TYB Pol genes;transcribed/translated as one unit; polyprotein isprocessed to make a nucleocapsid-like protein (Gag),reverse transcriptase (RT), protease (PR), and integrase(IN); similar to retroviral genes_left	CDS	complement(543970..547935)	/locus_tag="YHR214C-B"; /inference="non-experimental evidence, no additional details recorded"; /note="Yhr214c-bp"; /codon_start=1; /product="Retrotransposon TYA Gag and TYB Pol genes; transcribed/translated as one unit; polyprotein is processed to make a nucleocapsid-like protein (Gag), reverse transcriptase (RT), protease (PR), and integrase (IN); similar to retroviral genes"; /protein_id="NP_0…	543970..547935	8	TRUE	80543970	80547935
chr8_ref v2	Retrotransposon TYA Gag gene co-transcribed withTYB Pol; translated as TYA or TYA-TYB polyprotein; Gag isa nucleocapsid protein that is the structural constituentof virus-like particles (VLPs); similar to retroviral Gag	CDS	complement(547916..549352)	/locus_tag="YHR214C-C"; /inference="non-experimental evidence, no additional details recorded"; /note="Yhr214c-cp"; /codon_start=1; /product="Retrotransposon TYA Gag gene co-transcribed with TYB Pol; translated as TYA or TYA-TYB polyprotein; Gag is a nucleocapsid protein that is the structural constituent of virus-like particles (VLPs); similar to retroviral Gag"; /protein_id="NP_036195.1"; /db_x…	547916..549352	8	TRUE	80547916	80549352
chr8_ref v2	Retrotransposon TYA Gag and TYB Pol genes;transcribed/translated as one unit; polyprotein isprocessed to make a nucleocapsid-like protein (Gag),reverse transcriptase (RT), protease (PR), and integrase(IN); similar to retroviral genes_right	CDS	complement(547937..549352)	/locus_tag="YHR214C-B"; /inference="non-experimental evidence, no additional details recorded"; /note="Yhr214c-bp"; /codon_start=1; /product="Retrotransposon TYA Gag and TYB Pol genes; transcribed/translated as one unit; polyprotein is processed to make a nucleocapsid-like protein (Gag), reverse transcriptase (RT), protease (PR), and integrase (IN); similar to retroviral genes"; /protein_id="NP_0…	547937..549352	8	TRUE	80547937	80549352
chr9_ref v2	Retrotransposon TYA Gag and TYB Pol genes;transcribed/translated as one unit; polyprotein isprocessed to make a nucleocapsid-like protein (Gag),reverse transcriptase (RT), protease (PR), and integrase(IN); similar to retroviral genes_left	CDS	205600..206450	/locus_tag="YIL082W-A"; /inference="non-experimental evidence, no additional details recorded"; /note="Yil082w-ap"; /codon_start=1; /product="Retrotransposon TYA Gag and TYB Pol genes; transcribed/translated as one unit; polyprotein is processed to make a nucleocapsid-like protein (Gag), reverse transcriptase (RT), protease (PR), and integrase (IN); similar to retroviral genes"; /protein_id="NP_0…	205600..206450	9	FALSE	90205600	90206450
chr9_ref v2	Retrotransposon TYA Gag and TYB Pol genes;transcribed/translated as one unit; polyprotein isprocessed to make a nucleocapsid-like protein (Gag),reverse transcriptase (RT), protease (PR), and integrase(IN); similar to retroviral genes_right	CDS	206452..210097	/locus_tag="YIL082W-A"; /inference="non-experimental evidence, no additional details recorded"; /note="Yil082w-ap"; /codon_start=1; /product="Retrotransposon TYA Gag and TYB Pol genes; transcribed/translated as one unit; polyprotein is processed to make a nucleocapsid-like protein (Gag), reverse transcriptase (RT), protease (PR), and integrase (IN); similar to retroviral genes"; /protein_id="NP_0…	206452..210097	9	FALSE	90206452	90210097
chr10_ref v2	Putative protein of unknown function; member ofthe PIR (proteins with internal repeats) family of cellwall proteins; non-essential gene that is required forsporulation; mRNA is weakly cell cycle regulated, peakingin mitosis	CDS	complement(117961..118824)	/locus_tag="YJL160C"; /inference="non-experimental evidence, no additional details recorded"; /note="Yjl160cp"; /codon_start=1; /product="Putative protein of unknown function; member of the PIR (proteins with internal repeats) family of cell wall proteins; non-essential gene that is required for sporulation; mRNA is weakly cell cycle regulated, peaking in mitosis"; /protein_id="NP_012375.2"; /db_…	117961..118824	10	TRUE	100117961	100118824
chr10_ref v2	Retrotransposon TYA Gag gene co-transcribed withTYB Pol; translated as TYA or TYA-TYB polyprotein; Gag isa nucleocapsid protein that is the structural constituentof virus-like particles (VLPs); similar to retroviral Gag	CDS	197909..199098	/locus_tag="YJL114W"; /inference="non-experimental evidence, no additional details recorded"; /note="Yjl114wp"; /codon_start=1; /product="Retrotransposon TYA Gag gene co-transcribed with TYB Pol; translated as TYA or TYA-TYB polyprotein; Gag is a nucleocapsid protein that is the structural constituent of virus-like particles (VLPs); similar to retroviral Gag"; /protein_id="NP_012422.1"; /db_xref=…	197909..199098	10	FALSE	100197909	100199098
chr10_ref v2	Retrotransposon TYA Gag and TYB Pol genes;transcribed/translated as one unit; polyprotein isprocessed to make a nucleocapsid-like protein (Gag),reverse transcriptase (RT), protease (PR), and integrase(IN); similar to retroviral genes_left	CDS	197909..198945	/locus_tag="YJL113W"; /inference="non-experimental evidence, no additional details recorded"; /note="Yjl113wp"; /codon_start=1; /product="Retrotransposon TYA Gag and TYB Pol genes; transcribed/translated as one unit; polyprotein is processed to make a nucleocapsid-like protein (Gag), reverse transcriptase (RT), protease (PR), and integrase (IN); similar to retroviral genes"; /protein_id="NP_01242…	197909..198945	10	FALSE	100197909	100198945
chr10_ref v2	Retrotransposon TYA Gag and TYB Pol genes;transcribed/translated as one unit; polyprotein isprocessed to make a nucleocapsid-like protein (Gag),reverse transcriptase (RT), protease (PR), and integrase(IN); similar to retroviral genes_right	CDS	198947..203133	/locus_tag="YJL113W"; /inference="non-experimental evidence, no additional details recorded"; /note="Yjl113wp"; /codon_start=1; /product="Retrotransposon TYA Gag and TYB Pol genes; transcribed/translated as one unit; polyprotein is processed to make a nucleocapsid-like protein (Gag), reverse transcriptase (RT), protease (PR), and integrase (IN); similar to retroviral genes"; /protein_id="NP_01242…	198947..203133	10	FALSE	100198947	100203133
chr10_ref v2	Retrotransposon TYA Gag gene co-transcribed withTYB Pol; translated as TYA or TYA-TYB polyprotein; Gag isa nucleocapsid protein that is the structural constituentof virus-like particles (VLPs); similar to retroviral Gag	CDS	472413..473735	/locus_tag="YJR026W"; /inference="non-experimental evidence, no additional details recorded"; /note="Yjr026wp"; /codon_start=1; /product="Retrotransposon TYA Gag gene co-transcribed with TYB Pol; translated as TYA or TYA-TYB polyprotein; Gag is a nucleocapsid protein that is the structural constituent of virus-like particles (VLPs); similar to retroviral Gag"; /protein_id="NP_012561.1"; /db_xref=…	472413..473735	10	FALSE	100472413	100473735
chr10_ref v2	Retrotransposon TYA Gag and TYB Pol genes;transcribed/translated as one unit; polyprotein isprocessed to make a nucleocapsid-like protein (Gag),reverse transcriptase (RT), protease (PR), and integrase(IN); similar to retroviral genes_left	CDS	472413..473714	/locus_tag="YJR027W"; /inference="non-experimental evidence, no additional details recorded"; /note="Yjr027wp"; /codon_start=1; /product="Retrotransposon TYA Gag and TYB Pol genes; transcribed/translated as one unit; polyprotein is processed to make a nucleocapsid-like protein (Gag), reverse transcriptase (RT), protease (PR), and integrase (IN); similar to retroviral genes"; /protein_id="NP_01256…	472413..473714	10	FALSE	100472413	100473714
chr10_ref v2	Retrotransposon TYA Gag and TYB Pol genes;transcribed/translated as one unit; polyprotein isprocessed to make a nucleocapsid-like protein (Gag),reverse transcriptase (RT), protease (PR), and integrase(IN); similar to retroviral genes_right	CDS	473716..477681	/locus_tag="YJR027W"; /inference="non-experimental evidence, no additional details recorded"; /note="Yjr027wp"; /codon_start=1; /product="Retrotransposon TYA Gag and TYB Pol genes; transcribed/translated as one unit; polyprotein is processed to make a nucleocapsid-like protein (Gag), reverse transcriptase (RT), protease (PR), and integrase (IN); similar to retroviral genes"; /protein_id="NP_01256…	473716..477681	10	FALSE	100473716	100477681
chr10_ref v2	Retrotransposon TYA Gag gene co-transcribed withTYB Pol; translated as TYA or TYA-TYB polyprotein; Gag isa nucleocapsid protein that is the structural constituentof virus-like particles (VLPs); similar to retroviral Gag	CDS	477997..479319	/locus_tag="YJR028W"; /inference="non-experimental evidence, no additional details recorded"; /note="Yjr028wp"; /codon_start=1; /product="Retrotransposon TYA Gag gene co-transcribed with TYB Pol; translated as TYA or TYA-TYB polyprotein; Gag is a nucleocapsid protein that is the structural constituent of virus-like particles (VLPs); similar to retroviral Gag"; /protein_id="NP_012563.1"; /db_xref=…	477997..479319	10	FALSE	100477997	100479319
chr10_ref v2	Retrotransposon TYA Gag and TYB Pol genes;transcribed/translated as one unit; polyprotein isprocessed to make a nucleocapsid-like protein (Gag),reverse transcriptase (RT), protease (PR), and integrase(IN); similar to retroviral genes_left	CDS	477997..479297	/locus_tag="YJR029W"; /inference="non-experimental evidence, no additional details recorded"; /note="Yjr029wp"; /codon_start=1; /product="Retrotransposon TYA Gag and TYB Pol genes; transcribed/translated as one unit; polyprotein is processed to make a nucleocapsid-like protein (Gag), reverse transcriptase (RT), protease (PR), and integrase (IN); similar to retroviral genes"; /protein_id="NP_01256…	477997..479297	10	FALSE	100477997	100479297
chr10_ref v2	Retrotransposon TYA Gag and TYB Pol genes;transcribed/translated as one unit; polyprotein isprocessed to make a nucleocapsid-like protein (Gag),reverse transcriptase (RT), protease (PR), and integrase(IN); similar to retroviral genes_right	CDS	479299..483265	/locus_tag="YJR029W"; /inference="non-experimental evidence, no additional details recorded"; /note="Yjr029wp"; /codon_start=1; /product="Retrotransposon TYA Gag and TYB Pol genes; transcribed/translated as one unit; polyprotein is processed to make a nucleocapsid-like protein (Gag), reverse transcriptase (RT), protease (PR), and integrase (IN); similar to retroviral genes"; /protein_id="NP_01256…	479299..483265	10	FALSE	100479299	100483265
chr12_ref v2	Retrotransposon TYA Gag and TYB Pol genes;polyprotein is processed to make a nucleocapsid-likeprotein (Gag), reverse transcriptase (RT), protease (PR),and integrase (IN); YLR035C-A is part of a mutantretrotransposon	CDS	complement(215356..218823)	/locus_tag="YLR035C-A"; /inference="non-experimental evidence, no additional details recorded"; /note="Ylr035c-ap"; /codon_start=1; /product="Retrotransposon TYA Gag and TYB Pol genes; polyprotein is processed to make a nucleocapsid-like protein (Gag), reverse transcriptase (RT), protease (PR), and integrase (IN); YLR035C-A is part of a mutant retrotransposon"; /protein_id="NP_013136.1"; /db_xref…	215356..218823	12	TRUE	120215356	120218823
chr12_ref v2	Putative protein of unknown function; mutant hasdecreased Ty3 transposition; YLR125W is not an essentialgene	CDS	393393..393803	/locus_tag="YLR125W"; /inference="non-experimental evidence, no additional details recorded"; /note="Ylr125wp"; /codon_start=1; /product="Putative protein of unknown function; mutant has decreased Ty3 transposition; YLR125W is not an essential gene"; /protein_id="NP_013226.1"; /db_xref="GI:6323154"; /db_xref="SGD:S000004115"; /db_xref="GeneID:850816"; /translation="MGEILELTNKNFMSHLKKDITSQESLKSRIE…	393393..393803	12	FALSE	120393393	120393803
chr12_ref v2	Retrotransposon TYA Gag and TYB Pol genes;transcribed/translated as one unit; polyprotein isprocessed to make a nucleocapsid-like protein (Gag),reverse transcriptase (RT), protease (PR), and integrase(IN); similar to retroviral genes_left	CDS	complement(476242..480204)	/locus_tag="YLR157C-B"; /inference="non-experimental evidence, no additional details recorded"; /note="Ylr157c-bp"; /codon_start=1; /product="Retrotransposon TYA Gag and TYB Pol genes; transcribed/translated as one unit; polyprotein is processed to make a nucleocapsid-like protein (Gag), reverse transcriptase (RT), protease (PR), and integrase (IN); similar to retroviral genes"; /protein_id="NP_0…	476242..480204	12	TRUE	120476242	120480204
chr12_ref v2	Retrotransposon TYA Gag gene co-transcribed withTYB Pol; translated as TYA or TYA-TYB polyprotein; Gag isa nucleocapsid protein that is the structural constituentof virus-like particles (VLPs); similar to retroviral Gag	CDS	complement(480188..481510)	/locus_tag="YLR157C-A"; /inference="non-experimental evidence, no additional details recorded"; /note="Ylr157c-ap"; /codon_start=1; /product="Retrotransposon TYA Gag gene co-transcribed with TYB Pol; translated as TYA or TYA-TYB polyprotein; Gag is a nucleocapsid protein that is the structural constituent of virus-like particles (VLPs); similar to retroviral Gag"; /protein_id="NP_058170.1"; /db_x…	480188..481510	12	TRUE	120480188	120481510
chr12_ref v2	Retrotransposon TYA Gag and TYB Pol genes;transcribed/translated as one unit; polyprotein isprocessed to make a nucleocapsid-like protein (Gag),reverse transcriptase (RT), protease (PR), and integrase(IN); similar to retroviral genes_right	CDS	complement(480206..481510)	/locus_tag="YLR157C-B"; /inference="non-experimental evidence, no additional details recorded"; /note="Ylr157c-bp"; /codon_start=1; /product="Retrotransposon TYA Gag and TYB Pol genes; transcribed/translated as one unit; polyprotein is processed to make a nucleocapsid-like protein (Gag), reverse transcriptase (RT), protease (PR), and integrase (IN); similar to retroviral genes"; /protein_id="NP_0…	480206..481510	12	TRUE	120480206	120481510
chr12_ref v2	Retrotransposon TYA Gag gene co-transcribed withTYB Pol; translated as TYA or TYA-TYB polyprotein; Gag isa nucleocapsid protein that is the structural constituentof virus-like particles (VLPs); similar to retroviral Gag	CDS	593347..594669	/locus_tag="YLR227W-A"; /inference="non-experimental evidence, no additional details recorded"; /note="Ylr227w-ap"; /codon_start=1; /product="Retrotransposon TYA Gag gene co-transcribed with TYB Pol; translated as TYA or TYA-TYB polyprotein; Gag is a nucleocapsid protein that is the structural constituent of virus-like particles (VLPs); similar to retroviral Gag"; /protein_id="NP_058172.1"; /db_x…	593347..594669	12	FALSE	120593347	120594669
chr12_ref v2	Retrotransposon TYA Gag and TYB Pol genes;transcribed/translated as one unit; polyprotein isprocessed to make a nucleocapsid-like protein (Gag),reverse transcriptase (RT), protease (PR), and integrase(IN); similar to retroviral genes_left	CDS	593347..594651	/locus_tag="YLR227W-B"; /inference="non-experimental evidence, no additional details recorded"; /note="Ylr227w-bp"; /codon_start=1; /product="Retrotransposon TYA Gag and TYB Pol genes; transcribed/translated as one unit; polyprotein is processed to make a nucleocapsid-like protein (Gag), reverse transcriptase (RT), protease (PR), and integrase (IN); similar to retroviral genes"; /protein_id="NP_0…	593347..594651	12	FALSE	120593347	120594651
chr12_ref v2	Retrotransposon TYA Gag and TYB Pol genes;transcribed/translated as one unit; polyprotein isprocessed to make a nucleocapsid-like protein (Gag),reverse transcriptase (RT), protease (PR), and integrase(IN); similar to retroviral genes_right	CDS	594653..598615	/locus_tag="YLR227W-B"; /inference="non-experimental evidence, no additional details recorded"; /note="Ylr227w-bp"; /codon_start=1; /product="Retrotransposon TYA Gag and TYB Pol genes; transcribed/translated as one unit; polyprotein is processed to make a nucleocapsid-like protein (Gag), reverse transcriptase (RT), protease (PR), and integrase (IN); similar to retroviral genes"; /protein_id="NP_0…	594653..598615	12	FALSE	120594653	120598615
chr12_ref v2	Retrotransposon TYA Gag gene co-transcribed withTYB Pol; translated as TYA or TYA-TYB polyprotein; Gag isa nucleocapsid protein that is the structural constituentof virus-like particles (VLPs); similar to retroviral Gag	CDS	651026..652348	/locus_tag="YLR256W-A"; /inference="non-experimental evidence, no additional details recorded"; /note="Ylr256w-ap"; /codon_start=1; /product="Retrotransposon TYA Gag gene co-transcribed with TYB Pol; translated as TYA or TYA-TYB polyprotein; Gag is a nucleocapsid protein that is the structural constituent of virus-like particles (VLPs); similar to retroviral Gag"; /protein_id="NP_058173.1"; /db_x…	651026..652348	12	FALSE	120651026	120652348
chr12_ref v2	Retrotransposon TYA Gag gene co-transcribed withTYB Pol; translated as TYA or TYA-TYB polyprotein; Gag isa nucleocapsid protein that is the structural constituentof virus-like particles (VLPs); similar to retroviral Gag	CDS	941394..942710	/locus_tag="YLR410W-A"; /inference="non-experimental evidence, no additional details recorded"; /note="Ylr410w-ap"; /codon_start=1; /product="Retrotransposon TYA Gag gene co-transcribed with TYB Pol; translated as TYA or TYA-TYB polyprotein; Gag is a nucleocapsid protein that is the structural constituent of virus-like particles (VLPs); similar to retroviral Gag"; /protein_id="NP_058175.1"; /db_x…	941394..942710	12	FALSE	120941394	120942710
chr12_ref v2	Retrotransposon TYA Gag and TYB Pol genes;transcribed/translated as one unit; polyprotein isprocessed to make a nucleocapsid-like protein (Gag),reverse transcriptase (RT), protease (PR), and integrase(IN); similar to retroviral genes_left	CDS	941394..942686	/locus_tag="YLR410W-B"; /inference="non-experimental evidence, no additional details recorded"; /note="Ylr410w-bp"; /codon_start=1; /product="Retrotransposon TYA Gag and TYB Pol genes; transcribed/translated as one unit; polyprotein is processed to make a nucleocapsid-like protein (Gag), reverse transcriptase (RT), protease (PR), and integrase (IN); similar to retroviral genes"; /protein_id="NP_0…	941394..942686	12	FALSE	120941394	120942686
chr12_ref v2	Retrotransposon TYA Gag and TYB Pol genes;transcribed/translated as one unit; polyprotein isprocessed to make a nucleocapsid-like protein (Gag),reverse transcriptase (RT), protease (PR), and integrase(IN); similar to retroviral genes_right	CDS	942688..946707	/locus_tag="YLR410W-B"; /inference="non-experimental evidence, no additional details recorded"; /note="Ylr410w-bp"; /codon_start=1; /product="Retrotransposon TYA Gag and TYB Pol genes; transcribed/translated as one unit; polyprotein is processed to make a nucleocapsid-like protein (Gag), reverse transcriptase (RT), protease (PR), and integrase (IN); similar to retroviral genes"; /protein_id="NP_0…	942688..946707	12	FALSE	120942688	120946707
chr13_ref v2	Retrotransposon TYA Gag gene co-transcribed withTYB Pol; translated as TYA or TYA-TYB polyprotein; Gag isa nucleocapsid protein that is the structural constituentof virus-like particles (VLPs); similar to retroviral Gag	CDS	184457..185779	/locus_tag="YML045W-A"; /inference="non-experimental evidence, no additional details recorded"; /note="Yml045w-ap"; /codon_start=1; /product="Retrotransposon TYA Gag gene co-transcribed with TYB Pol; translated as TYA or TYA-TYB polyprotein; Gag is a nucleocapsid protein that is the structural constituent of virus-like particles (VLPs); similar to retroviral Gag"; /protein_id="NP_058176.1"; /db_x…	184457..185779	13	FALSE	130184457	130185779
chr13_ref v2	Retrotransposon TYA Gag and TYB Pol genes;transcribed/translated as one unit; polyprotein isprocessed to make a nucleocapsid-like protein (Gag),reverse transcriptase (RT), protease (PR), and integrase(IN); similar to retroviral genes_left	CDS	184457..185761	/locus_tag="YML045W"; /inference="non-experimental evidence, no additional details recorded"; /note="Yml045wp"; /codon_start=1; /product="Retrotransposon TYA Gag and TYB Pol genes; transcribed/translated as one unit; polyprotein is processed to make a nucleocapsid-like protein (Gag), reverse transcriptase (RT), protease (PR), and integrase (IN); similar to retroviral genes"; /protein_id="NP_01366…	184457..185761	13	FALSE	130184457	130185761
chr13_ref v2	Retrotransposon TYA Gag and TYB Pol genes;transcribed/translated as one unit; polyprotein isprocessed to make a nucleocapsid-like protein (Gag),reverse transcriptase (RT), protease (PR), and integrase(IN); similar to retroviral genes_right	CDS	185763..189725	/locus_tag="YML045W"; /inference="non-experimental evidence, no additional details recorded"; /note="Yml045wp"; /codon_start=1; /product="Retrotransposon TYA Gag and TYB Pol genes; transcribed/translated as one unit; polyprotein is processed to make a nucleocapsid-like protein (Gag), reverse transcriptase (RT), protease (PR), and integrase (IN); similar to retroviral genes"; /protein_id="NP_01366…	185763..189725	13	FALSE	130185763	130189725
chr13_ref v2	Retrotransposon TYA Gag gene co-transcribed withTYB Pol; translated as TYA or TYA-TYB polyprotein; Gag isa nucleocapsid protein that is the structural constituentof virus-like particles (VLPs); similar to retroviral Gag	CDS	196624..197946	/locus_tag="YML040W"; /inference="non-experimental evidence, no additional details recorded"; /note="Yml040wp"; /codon_start=1; /product="Retrotransposon TYA Gag gene co-transcribed with TYB Pol; translated as TYA or TYA-TYB polyprotein; Gag is a nucleocapsid protein that is the structural constituent of virus-like particles (VLPs); similar to retroviral Gag"; /protein_id="NP_013673.1"; /db_xref=…	196624..197946	13	FALSE	130196624	130197946
chr13_ref v2	Retrotransposon TYA Gag and TYB Pol genes;transcribed/translated as one unit; polyprotein isprocessed to make a nucleocapsid-like protein (Gag),reverse transcriptase (RT), protease (PR), and integrase(IN); similar to retroviral genes_left	CDS	196624..197928	/locus_tag="YML039W"; /inference="non-experimental evidence, no additional details recorded"; /note="Yml039wp"; /codon_start=1; /product="Retrotransposon TYA Gag and TYB Pol genes; transcribed/translated as one unit; polyprotein is processed to make a nucleocapsid-like protein (Gag), reverse transcriptase (RT), protease (PR), and integrase (IN); similar to retroviral genes"; /protein_id="NP_01367…	196624..197928	13	FALSE	130196624	130197928
chr13_ref v2	Retrotransposon TYA Gag and TYB Pol genes;transcribed/translated as one unit; polyprotein isprocessed to make a nucleocapsid-like protein (Gag),reverse transcriptase (RT), protease (PR), and integrase(IN); similar to retroviral genes_right	CDS	197930..201892	/locus_tag="YML039W"; /inference="non-experimental evidence, no additional details recorded"; /note="Yml039wp"; /codon_start=1; /product="Retrotransposon TYA Gag and TYB Pol genes; transcribed/translated as one unit; polyprotein is processed to make a nucleocapsid-like protein (Gag), reverse transcriptase (RT), protease (PR), and integrase (IN); similar to retroviral genes"; /protein_id="NP_01367…	197930..201892	13	FALSE	130197930	130201892
chr13_ref v2	Putative transporter, member of the SLC10carrier family; identified in a transposon mutagenesisscreen as a gene involved in azole resistance; YMR034C isnot an essential gene	CDS	complement(339412..340716)	/locus_tag="YMR034C"; /inference="non-experimental evidence, no additional details recorded"; /note="Ymr034cp"; /codon_start=1; /product="Putative transporter, member of the SLC10 carrier family; identified in a transposon mutagenesis screen as a gene involved in azole resistance; YMR034C is not an essential gene"; /protein_id="NP_013748.1"; /db_xref="GI:6323677"; /db_xref="SGD:S000004637"; /db_x…	339412..340716	13	TRUE	130339412	130340716
chr13_ref v2	Retrotransposon TYA Gag and TYB Pol genes;transcribed/translated as one unit; polyprotein isprocessed to make a nucleocapsid-like protein (Gag),reverse transcriptase (RT), protease (PR), and integrase(IN); similar to retroviral genes_left	CDS	complement(357353..361315)	/locus_tag="YMR045C"; /inference="non-experimental evidence, no additional details recorded"; /note="Ymr045cp"; /codon_start=1; /product="Retrotransposon TYA Gag and TYB Pol genes; transcribed/translated as one unit; polyprotein is processed to make a nucleocapsid-like protein (Gag), reverse transcriptase (RT), protease (PR), and integrase (IN); similar to retroviral genes"; /protein_id="NP_01375…	357353..361315	13	TRUE	130357353	130361315
chr13_ref v2	Retrotransposon TYA Gag gene co-transcribed withTYB Pol; translated as TYA or TYA-TYB polyprotein; Gag isa nucleocapsid protein that is the structural constituentof virus-like particles (VLPs); similar to retroviral Gag	CDS	complement(361299..362621)	/locus_tag="YMR046C"; /inference="non-experimental evidence, no additional details recorded"; /note="Ymr046cp"; /codon_start=1; /product="Retrotransposon TYA Gag gene co-transcribed with TYB Pol; translated as TYA or TYA-TYB polyprotein; Gag is a nucleocapsid protein that is the structural constituent of virus-like particles (VLPs); similar to retroviral Gag"; /protein_id="NP_013760.1"; /db_xref=…	361299..362621	13	TRUE	130361299	130362621
chr13_ref v2	Retrotransposon TYA Gag and TYB Pol genes;transcribed/translated as one unit; polyprotein isprocessed to make a nucleocapsid-like protein (Gag),reverse transcriptase (RT), protease (PR), and integrase(IN); similar to retroviral genes_right	CDS	complement(361317..362621)	/locus_tag="YMR045C"; /inference="non-experimental evidence, no additional details recorded"; /note="Ymr045cp"; /codon_start=1; /product="Retrotransposon TYA Gag and TYB Pol genes; transcribed/translated as one unit; polyprotein is processed to make a nucleocapsid-like protein (Gag), reverse transcriptase (RT), protease (PR), and integrase (IN); similar to retroviral genes"; /protein_id="NP_01375…	361317..362621	13	TRUE	130361317	130362621
chr13_ref v2	Retrotransposon TYA Gag and TYB Pol genes;transcribed/translated as one unit; polyprotein isprocessed to make a nucleocapsid-like protein (Gag),reverse transcriptase (RT), protease (PR), and integrase(IN); similar to retroviral genes_left	CDS	complement(373051..377013)	/locus_tag="YMR050C"; /inference="non-experimental evidence, no additional details recorded"; /note="Ymr050cp"; /codon_start=1; /product="Retrotransposon TYA Gag and TYB Pol genes; transcribed/translated as one unit; polyprotein is processed to make a nucleocapsid-like protein (Gag), reverse transcriptase (RT), protease (PR), and integrase (IN); similar to retroviral genes"; /protein_id="NP_01376…	373051..377013	13	TRUE	130373051	130377013
chr13_ref v2	Retrotransposon TYA Gag gene co-transcribed withTYB Pol; translated as TYA or TYA-TYB polyprotein; Gag isa nucleocapsid protein that is the structural constituentof virus-like particles (VLPs); similar to retroviral Gag	CDS	complement(376997..378319)	/locus_tag="YMR051C"; /inference="non-experimental evidence, no additional details recorded"; /note="Ymr051cp"; /codon_start=1; /product="Retrotransposon TYA Gag gene co-transcribed with TYB Pol; translated as TYA or TYA-TYB polyprotein; Gag is a nucleocapsid protein that is the structural constituent of virus-like particles (VLPs); similar to retroviral Gag"; /protein_id="NP_013766.1"; /db_xref=…	376997..378319	13	TRUE	130376997	130378319
chr13_ref v2	Retrotransposon TYA Gag and TYB Pol genes;transcribed/translated as one unit; polyprotein isprocessed to make a nucleocapsid-like protein (Gag),reverse transcriptase (RT), protease (PR), and integrase(IN); similar to retroviral genes_right	CDS	complement(377015..378319)	/locus_tag="YMR050C"; /inference="non-experimental evidence, no additional details recorded"; /note="Ymr050cp"; /codon_start=1; /product="Retrotransposon TYA Gag and TYB Pol genes; transcribed/translated as one unit; polyprotein is processed to make a nucleocapsid-like protein (Gag), reverse transcriptase (RT), protease (PR), and integrase (IN); similar to retroviral genes"; /protein_id="NP_01376…	377015..378319	13	TRUE	130377015	130378319
chr14_ref v2	Retrotransposon TYA Gag and TYB Pol genes;transcribed/translated as one unit; polyprotein isprocessed to make a nucleocapsid-like protein (Gag),reverse transcriptase (RT), protease (PR), and integrase(IN); similar to retroviral genes_left	CDS	complement(96968..100930)	/locus_tag="YNL284C-B"; /inference="non-experimental evidence, no additional details recorded"; /note="Ynl284c-bp"; /codon_start=1; /product="Retrotransposon TYA Gag and TYB Pol genes; transcribed/translated as one unit; polyprotein is processed to make a nucleocapsid-like protein (Gag), reverse transcriptase (RT), protease (PR), and integrase (IN); similar to retroviral genes"; /protein_id="NP_0…	96968..100930	14	TRUE	140096968	140100930
chr14_ref v2	Retrotransposon TYA Gag gene co-transcribed withTYB Pol; translated as TYA or TYA-TYB polyprotein; Gag isa nucleocapsid protein that is the structural constituentof virus-like particles (VLPs); similar to retroviral Gag	CDS	complement(100914..102190)	/locus_tag="YNL284C-A"; /inference="non-experimental evidence, no additional details recorded"; /note="Ynl284c-ap"; /codon_start=1; /product="Retrotransposon TYA Gag gene co-transcribed with TYB Pol; translated as TYA or TYA-TYB polyprotein; Gag is a nucleocapsid protein that is the structural constituent of virus-like particles (VLPs); similar to retroviral Gag"; /protein_id="NP_058179.1"; /db_x…	100914..102190	14	TRUE	140100914	140102190
chr14_ref v2	Retrotransposon TYA Gag and TYB Pol genes;transcribed/translated as one unit; polyprotein isprocessed to make a nucleocapsid-like protein (Gag),reverse transcriptase (RT), protease (PR), and integrase(IN); similar to retroviral genes_right	CDS	complement(100932..102190)	/locus_tag="YNL284C-B"; /inference="non-experimental evidence, no additional details recorded"; /note="Ynl284c-bp"; /codon_start=1; /product="Retrotransposon TYA Gag and TYB Pol genes; transcribed/translated as one unit; polyprotein is processed to make a nucleocapsid-like protein (Gag), reverse transcriptase (RT), protease (PR), and integrase (IN); similar to retroviral genes"; /protein_id="NP_0…	100932..102190	14	TRUE	140100932	140102190
chr14_ref v2	Retrotransposon TYA Gag gene co-transcribed withTYB Pol; translated as TYA or TYA-TYB polyprotein; Gag isa nucleocapsid protein that is the structural constituentof virus-like particles (VLPs); similar to retroviral Gag	CDS	519412..520734	/locus_tag="YNL054W-A"; /inference="non-experimental evidence, no additional details recorded"; /note="Ynl054w-ap"; /codon_start=1; /product="Retrotransposon TYA Gag gene co-transcribed with TYB Pol; translated as TYA or TYA-TYB polyprotein; Gag is a nucleocapsid protein that is the structural constituent of virus-like particles (VLPs); similar to retroviral Gag"; /protein_id="NP_058180.1"; /db_x…	519412..520734	14	FALSE	140519412	140520734
chr15_ref v2	Soluble protein of unknown function; deletionmutants are viable and have elevated levels of Ty1retrotransposition and Ty1 cDNA	CDS	complement(17281..17796)	/locus_tag="YOL159C"; /inference="non-experimental evidence, no additional details recorded"; /note="Yol159cp"; /codon_start=1; /product="Soluble protein of unknown function; deletion mutants are viable and have elevated levels of Ty1 retrotransposition and Ty1 cDNA"; /protein_id="NP_014483.1"; /db_xref="GI:6324414"; /db_xref="SGD:S000005519"; /db_xref="GeneID:854006"; /translation="MVPLFGLFCIFSQ…	17281..17796	15	TRUE	150017281	150017796
chr15_ref v2	Retrotransposon TYA Gag gene co-transcribed withTYB Pol; translated as TYA or TYA-TYB polyprotein; Gag isa nucleocapsid protein that is the structural constituentof virus-like particles (VLPs); similar to retroviral Gag	CDS	118000..119322	/locus_tag="YOL103W-A"; /inference="non-experimental evidence, no additional details recorded"; /note="Yol103w-ap"; /codon_start=1; /product="Retrotransposon TYA Gag gene co-transcribed with TYB Pol; translated as TYA or TYA-TYB polyprotein; Gag is a nucleocapsid protein that is the structural constituent of virus-like particles (VLPs); similar to retroviral Gag"; /protein_id="NP_058182.1"; /db_x…	118000..119322	15	FALSE	150118000	150119322
chr15_ref v2	Retrotransposon TYA Gag and TYB Pol genes;transcribed/translated as one unit; polyprotein isprocessed to make a nucleocapsid-like protein (Gag),reverse transcriptase (RT), protease (PR), and integrase(IN); similar to retroviral genes_left	CDS	118000..119304	/locus_tag="YOL103W-B"; /inference="non-experimental evidence, no additional details recorded"; /note="Yol103w-bp"; /codon_start=1; /product="Retrotransposon TYA Gag and TYB Pol genes; transcribed/translated as one unit; polyprotein is processed to make a nucleocapsid-like protein (Gag), reverse transcriptase (RT), protease (PR), and integrase (IN); similar to retroviral genes"; /protein_id="NP_0…	118000..119304	15	FALSE	150118000	150119304
chr15_ref v2	Retrotransposon TYA Gag and TYB Pol genes;transcribed/translated as one unit; polyprotein isprocessed to make a nucleocapsid-like protein (Gag),reverse transcriptase (RT), protease (PR), and integrase(IN); similar to retroviral genes_right	CDS	119306..123268	/locus_tag="YOL103W-B"; /inference="non-experimental evidence, no additional details recorded"; /note="Yol103w-bp"; /codon_start=1; /product="Retrotransposon TYA Gag and TYB Pol genes; transcribed/translated as one unit; polyprotein is processed to make a nucleocapsid-like protein (Gag), reverse transcriptase (RT), protease (PR), and integrase (IN); similar to retroviral genes"; /protein_id="NP_0…	119306..123268	15	FALSE	150119306	150123268
chr15_ref v2	Retrotransposon TYA Gag gene co-transcribed withTYB Pol; translated as TYA or TYA-TYB polyprotein; Gag isa nucleocapsid protein that is the structural constituentof virus-like particles (VLPs); similar to retroviral Gag	CDS	593154..594476	/locus_tag="YOR142W-A"; /inference="non-experimental evidence, no additional details recorded"; /note="Yor142w-ap"; /codon_start=1; /product="Retrotransposon TYA Gag gene co-transcribed with TYB Pol; translated as TYA or TYA-TYB polyprotein; Gag is a nucleocapsid protein that is the structural constituent of virus-like particles (VLPs); similar to retroviral Gag"; /protein_id="NP_058184.1"; /db_x…	593154..594476	15	FALSE	150593154	150594476
chr15_ref v2	Retrotransposon TYA Gag and TYB Pol genes;transcribed/translated as one unit; polyprotein isprocessed to make a nucleocapsid-like protein (Gag),reverse transcriptase (RT), protease (PR), and integrase(IN); similar to retroviral genes_left	CDS	593154..594458	/locus_tag="YOR142W-B"; /inference="non-experimental evidence, no additional details recorded"; /note="Yor142w-bp"; /codon_start=1; /product="Retrotransposon TYA Gag and TYB Pol genes; transcribed/translated as one unit; polyprotein is processed to make a nucleocapsid-like protein (Gag), reverse transcriptase (RT), protease (PR), and integrase (IN); similar to retroviral genes"; /protein_id="NP_0…	593154..594458	15	FALSE	150593154	150594458
chr15_ref v2	Retrotransposon TYA Gag and TYB Pol genes;transcribed/translated as one unit; polyprotein isprocessed to make a nucleocapsid-like protein (Gag),reverse transcriptase (RT), protease (PR), and integrase(IN); similar to retroviral genes_right	CDS	594460..598422	/locus_tag="YOR142W-B"; /inference="non-experimental evidence, no additional details recorded"; /note="Yor142w-bp"; /codon_start=1; /product="Retrotransposon TYA Gag and TYB Pol genes; transcribed/translated as one unit; polyprotein is processed to make a nucleocapsid-like protein (Gag), reverse transcriptase (RT), protease (PR), and integrase (IN); similar to retroviral genes"; /protein_id="NP_0…	594460..598422	15	FALSE	150594460	150598422
chr15_ref v2	Retrotransposon TYA Gag and TYB Pol genes;transcribed/translated as one unit; polyprotein isprocessed to make a nucleocapsid-like protein (Gag),reverse transcriptase (RT), protease (PR), and integrase(IN); similar to retroviral genes_left	CDS	complement(702461..706480)	/locus_tag="YOR192C-B"; /inference="non-experimental evidence, no additional details recorded"; /note="Yor192c-bp"; /codon_start=1; /product="Retrotransposon TYA Gag and TYB Pol genes; transcribed/translated as one unit; polyprotein is processed to make a nucleocapsid-like protein (Gag), reverse transcriptase (RT), protease (PR), and integrase (IN); similar to retroviral genes"; /protein_id="NP_0…	702461..706480	15	TRUE	150702461	150706480
chr15_ref v2	Retrotransposon TYA Gag gene co-transcribed withTYB Pol; translated as TYA or TYA-TYB polyprotein; Gag isa nucleocapsid protein that is the structural constituentof virus-like particles (VLPs); similar to retroviral Gag	CDS	complement(706458..707774)	/locus_tag="YOR192C-A"; /inference="non-experimental evidence, no additional details recorded"; /note="Yor192c-ap"; /codon_start=1; /product="Retrotransposon TYA Gag gene co-transcribed with TYB Pol; translated as TYA or TYA-TYB polyprotein; Gag is a nucleocapsid protein that is the structural constituent of virus-like particles (VLPs); similar to retroviral Gag"; /protein_id="NP_058186.1"; /db_x…	706458..707774	15	TRUE	150706458	150707774
chr15_ref v2	Retrotransposon TYA Gag and TYB Pol genes;transcribed/translated as one unit; polyprotein isprocessed to make a nucleocapsid-like protein (Gag),reverse transcriptase (RT), protease (PR), and integrase(IN); similar to retroviral genes_right	CDS	complement(706482..707774)	/locus_tag="YOR192C-B"; /inference="non-experimental evidence, no additional details recorded"; /note="Yor192c-bp"; /codon_start=1; /product="Retrotransposon TYA Gag and TYB Pol genes; transcribed/translated as one unit; polyprotein is processed to make a nucleocapsid-like protein (Gag), reverse transcriptase (RT), protease (PR), and integrase (IN); similar to retroviral genes"; /protein_id="NP_0…	706482..707774	15	TRUE	150706482	150707774
chr15_ref v2	Retrotransposon TYA Gag gene co-transcribed withTYB Pol; translated as TYA or TYA-TYB polyprotein; Gag isa nucleocapsid protein that is the structural constituentof virus-like particles (VLPs); similar to retroviral Gag	CDS	968619..969935	/locus_tag="YOR343W-A"; /inference="non-experimental evidence, no additional details recorded"; /note="Yor343w-ap"; /codon_start=1; /product="Retrotransposon TYA Gag gene co-transcribed with TYB Pol; translated as TYA or TYA-TYB polyprotein; Gag is a nucleocapsid protein that is the structural constituent of virus-like particles (VLPs); similar to retroviral Gag"; /protein_id="NP_620390.1"; /db_x…	968619..969935	15	FALSE	150968619	150969935
chr15_ref v2	Retrotransposon TYA Gag and TYB Pol genes;transcribed/translated as one unit; polyprotein isprocessed to make a nucleocapsid-like protein (Gag),reverse transcriptase (RT), protease (PR), and integrase(IN); similar to retroviral genes_left	CDS	968619..969912	/locus_tag="YOR343W-B"; /inference="non-experimental evidence, no additional details recorded"; /note="Yor343w-bp"; /codon_start=1; /product="Retrotransposon TYA Gag and TYB Pol genes; transcribed/translated as one unit; polyprotein is processed to make a nucleocapsid-like protein (Gag), reverse transcriptase (RT), protease (PR), and integrase (IN); similar to retroviral genes"; /protein_id="NP_6…	968619..969912	15	FALSE	150968619	150969912
chr15_ref v2	Retrotransposon TYA Gag and TYB Pol genes;transcribed/translated as one unit; polyprotein isprocessed to make a nucleocapsid-like protein (Gag),reverse transcriptase (RT), protease (PR), and integrase(IN); similar to retroviral genes_right	CDS	969914..973932	/locus_tag="YOR343W-B"; /inference="non-experimental evidence, no additional details recorded"; /note="Yor343w-bp"; /codon_start=1; /product="Retrotransposon TYA Gag and TYB Pol genes; transcribed/translated as one unit; polyprotein is processed to make a nucleocapsid-like protein (Gag), reverse transcriptase (RT), protease (PR), and integrase (IN); similar to retroviral genes"; /protein_id="NP_6…	969914..973932	15	FALSE	150969914	150973932
chr16_ref v2	Retrotransposon TYA Gag gene co-transcribed withTYB Pol; translated as TYA or TYA-TYB polyprotein; Gag isa nucleocapsid protein that is the structural constituentof virus-like particles (VLPs); similar to retroviral Gag	CDS	56748..58070	/locus_tag="YPL257W-A"; /inference="non-experimental evidence, no additional details recorded"; /note="Ypl257w-ap"; /codon_start=1; /product="Retrotransposon TYA Gag gene co-transcribed with TYB Pol; translated as TYA or TYA-TYB polyprotein; Gag is a nucleocapsid protein that is the structural constituent of virus-like particles (VLPs); similar to retroviral Gag"; /protein_id="NP_058190.1"; /db_x…	56748..58070	16	FALSE	160056748	160058070
chr16_ref v2	Retrotransposon TYA Gag and TYB Pol genes;transcribed/translated as one unit; polyprotein isprocessed to make a nucleocapsid-like protein (Gag),reverse transcriptase (RT), protease (PR), and integrase(IN); similar to retroviral genes_left	CDS	56748..58052	/locus_tag="YPL257W-B"; /inference="non-experimental evidence, no additional details recorded"; /note="Ypl257w-bp"; /codon_start=1; /product="Retrotransposon TYA Gag and TYB Pol genes; transcribed/translated as one unit; polyprotein is processed to make a nucleocapsid-like protein (Gag), reverse transcriptase (RT), protease (PR), and integrase (IN); similar to retroviral genes"; /protein_id="NP_0…	56748..58052	16	FALSE	160056748	160058052
chr16_ref v2	Retrotransposon TYA Gag and TYB Pol genes;transcribed/translated as one unit; polyprotein isprocessed to make a nucleocapsid-like protein (Gag),reverse transcriptase (RT), protease (PR), and integrase(IN); similar to retroviral genes_right	CDS	58054..62016	/locus_tag="YPL257W-B"; /inference="non-experimental evidence, no additional details recorded"; /note="Ypl257w-bp"; /codon_start=1; /product="Retrotransposon TYA Gag and TYB Pol genes; transcribed/translated as one unit; polyprotein is processed to make a nucleocapsid-like protein (Gag), reverse transcriptase (RT), protease (PR), and integrase (IN); similar to retroviral genes"; /protein_id="NP_0…	58054..62016	16	FALSE	160058054	160062016
chr16_ref v2	Putative protein of unknown function; greenfluorescent protein (GFP)-fusion protein localizes to thecytoplasm and nucleus; similar to the petunia WD repeatprotein an11; YPL247C is not an essential gene	CDS	complement(82616..84187)	/locus_tag="YPL247C"; /inference="non-experimental evidence, no additional details recorded"; /note="Ypl247cp"; /codon_start=1; /product="Putative protein of unknown function; green fluorescent protein (GFP)-fusion protein localizes to the cytoplasm and nucleus; similar to the petunia WD repeat protein an11; YPL247C is not an essential gene"; /protein_id="NP_015077.1"; /db_xref="GI:6325009"; /db_…	82616..84187	16	TRUE	160082616	160084187
chr16_ref v2	Retrotransposon TYA Gag and TYB Pol genes;transcribed/translated as one unit; polyprotein isprocessed to make a nucleocapsid-like protein (Gag),reverse transcriptase (RT), protease (PR), and integrase(IN); similar to retroviral genes_left	CDS	complement(804995..808957)	/locus_tag="YPR137C-B"; /inference="non-experimental evidence, no additional details recorded"; /note="Ypr137c-bp"; /codon_start=1; /product="Retrotransposon TYA Gag and TYB Pol genes; transcribed/translated as one unit; polyprotein is processed to make a nucleocapsid-like protein (Gag), reverse transcriptase (RT), protease (PR), and integrase (IN); similar to retroviral genes"; /protein_id="NP_0…	804995..808957	16	TRUE	160804995	160808957
chr16_ref v2	Retrotransposon TYA Gag gene co-transcribed withTYB Pol; translated as TYA or TYA-TYB polyprotein; Gag isa nucleocapsid protein that is the structural constituentof virus-like particles (VLPs); similar to retroviral Gag	CDS	complement(808941..810263)	/locus_tag="YPR137C-A"; /inference="non-experimental evidence, no additional details recorded"; /note="Ypr137c-ap"; /codon_start=1; /product="Retrotransposon TYA Gag gene co-transcribed with TYB Pol; translated as TYA or TYA-TYB polyprotein; Gag is a nucleocapsid protein that is the structural constituent of virus-like particles (VLPs); similar to retroviral Gag"; /protein_id="NP_058192.1"; /db_x…	808941..810263	16	TRUE	160808941	160810263
chr16_ref v2	Retrotransposon TYA Gag and TYB Pol genes;transcribed/translated as one unit; polyprotein isprocessed to make a nucleocapsid-like protein (Gag),reverse transcriptase (RT), protease (PR), and integrase(IN); similar to retroviral genes_right	CDS	complement(808959..810263)	/locus_tag="YPR137C-B"; /inference="non-experimental evidence, no additional details recorded"; /note="Ypr137c-bp"; /codon_start=1; /product="Retrotransposon TYA Gag and TYB Pol genes; transcribed/translated as one unit; polyprotein is processed to make a nucleocapsid-like protein (Gag), reverse transcriptase (RT), protease (PR), and integrase (IN); similar to retroviral genes"; /protein_id="NP_0…	808959..810263	16	TRUE	160808959	160810263
chr16_ref v2	Retrotransposon TYA Gag gene co-transcribed withTYB Pol; translated as TYA or TYA-TYB polyprotein; Gag isa nucleocapsid protein that is the structural constituentof virus-like particles (VLPs); similar to retroviral Gag	CDS	844703..846025	/locus_tag="YPR158W-A"; /inference="non-experimental evidence, no additional details recorded"; /note="Ypr158w-ap"; /codon_start=1; /product="Retrotransposon TYA Gag gene co-transcribed with TYB Pol; translated as TYA or TYA-TYB polyprotein; Gag is a nucleocapsid protein that is the structural constituent of virus-like particles (VLPs); similar to retroviral Gag"; /protein_id="NP_058194.1"; /db_x…	844703..846025	16	FALSE	160844703	160846025
chr16_ref v2	Retrotransposon TYA Gag and TYB Pol genes;transcribed/translated as one unit; polyprotein isprocessed to make a nucleocapsid-like protein (Gag),reverse transcriptase (RT), protease (PR), and integrase(IN); similar to retroviral genes_left	CDS	844703..846007	/locus_tag="YPR158W-B"; /inference="non-experimental evidence, no additional details recorded"; /note="Ypr158w-bp"; /codon_start=1; /product="Retrotransposon TYA Gag and TYB Pol genes; transcribed/translated as one unit; polyprotein is processed to make a nucleocapsid-like protein (Gag), reverse transcriptase (RT), protease (PR), and integrase (IN); similar to retroviral genes"; /protein_id="NP_0…	844703..846007	16	FALSE	160844703	160846007
chr16_ref v2	Retrotransposon TYA Gag and TYB Pol genes;transcribed/translated as one unit; polyprotein isprocessed to make a nucleocapsid-like protein (Gag),reverse transcriptase (RT), protease (PR), and integrase(IN); similar to retroviral genes_right	CDS	846009..849974	/locus_tag="YPR158W-B"; /inference="non-experimental evidence, no additional details recorded"; /note="Ypr158w-bp"; /codon_start=1; /product="Retrotransposon TYA Gag and TYB Pol genes; transcribed/translated as one unit; polyprotein is processed to make a nucleocapsid-like protein (Gag), reverse transcriptase (RT), protease (PR), and integrase (IN); similar to retroviral genes"; /protein_id="NP_0…	846009..849974	16	FALSE	160846009	160849974
chr16_ref v2	Retrotransposon TYA Gag and TYB Pol genes;transcribed/translated as one unit; polyprotein isprocessed to make a nucleocapsid-like protein (Gag),reverse transcriptase (RT), protease (PR), and integrase(IN); similar to retroviral genes_left	CDS	complement(850983..854945)	/locus_tag="YPR158C-D"; /inference="non-experimental evidence, no additional details recorded"; /note="Ypr158c-dp"; /codon_start=1; /product="Retrotransposon TYA Gag and TYB Pol genes; transcribed/translated as one unit; polyprotein is processed to make a nucleocapsid-like protein (Gag), reverse transcriptase (RT), protease (PR), and integrase (IN); similar to retroviral genes"; /protein_id="NP_0…	850983..854945	16	TRUE	160850983	160854945
chr16_ref v2	Retrotransposon TYA Gag gene co-transcribed withTYB Pol; translated as TYA or TYA-TYB polyprotein; Gag isa nucleocapsid protein that is the structural constituentof virus-like particles (VLPs); similar to retroviral Gag	CDS	complement(854929..856251)	/locus_tag="YPR158C-C"; /inference="non-experimental evidence, no additional details recorded"; /note="Ypr158c-cp"; /codon_start=1; /product="Retrotransposon TYA Gag gene co-transcribed with TYB Pol; translated as TYA or TYA-TYB polyprotein; Gag is a nucleocapsid protein that is the structural constituent of virus-like particles (VLPs); similar to retroviral Gag"; /protein_id="NP_058196.1"; /db_x…	854929..856251	16	TRUE	160854929	160856251
chr16_ref v2	Retrotransposon TYA Gag and TYB Pol genes;transcribed/translated as one unit; polyprotein isprocessed to make a nucleocapsid-like protein (Gag),reverse transcriptase (RT), protease (PR), and integrase(IN); similar to retroviral genes_right	CDS	complement(854947..856251)	/locus_tag="YPR158C-D"; /inference="non-experimental evidence, no additional details recorded"; /note="Ypr158c-dp"; /codon_start=1; /product="Retrotransposon TYA Gag and TYB Pol genes; transcribed/translated as one unit; polyprotein is processed to make a nucleocapsid-like protein (Gag), reverse transcriptase (RT), protease (PR), and integrase (IN); similar to retroviral genes"; /protein_id="NP_0…	854947..856251	16	TRUE	160854947	160856251
chr1_ref v2	FLO9	Gene	complement(24001..27680)	/gene="FLO9"; /locus_tag="YAL063C"; /db_xref="GeneID:851236"	24001..27680	1	TRUE	10024001	10027680
chr1_ref v2	FLO1	Gene	199940..204047	/gene="FLO1"; /locus_tag="YAR050W"; /synonym="FLO4, FLO2"; /db_xref="GeneID:851289"	199940..204047	1	FALSE	10199940	10204047
chr4_ref v2	CCT4	Gene	199935..201521	/gene="CCT4"; /locus_tag="YDL143W"; /synonym="ANC2, TCP4"; /db_xref="GeneID:851412"	199935..201521	4	FALSE	40199935	40201521
chr4_ref v2	CCT6	Gene	836323..837963	/gene="CCT6"; /locus_tag="YDR188W"; /synonym="TCP20, TCP6, HTR3"; /db_xref="GeneID:851768"	836323..837963	4	FALSE	40836323	40837963
chr5_ref v2	FLO8	Gene	complement(374107..376506)	/gene="FLO8"; /locus_tag="YER109C"; /gene_synonym="PHD5; YER108C"; /db_xref="GeneID:856845"	374107..376506	5	TRUE	50374107	50376506
chr5_ref v2	YCK3	Gene	403705..405279	/gene="YCK3"; /locus_tag="YER123W"; /gene_synonym="CKI3"; /db_xref="GeneID:856860"	403705..405279	5	FALSE	50403705	50405279
chr7_ref v2	ROM1	Gene	627795..631262	/gene="ROM1"; /locus_tag="YGR070W"; /synonym="SKC1"; /db_xref="GeneID:852961"	627795..631262	7	FALSE	70627795	70631262
chr7_ref v2	PFK1	Gene	complement(970685..973648)	/gene="PFK1"; /locus_tag="YGR240C"; /db_xref="GeneID:853155"	970685..973648	7	TRUE	70970685	70973648
chr8_ref v2	YCK1	Gene	complement(372702..374318)	/gene="YCK1"; /locus_tag="YHR135C"; /synonym="CKI2"; /db_xref="GeneID:856537"	372702..374318	8	TRUE	80372702	80374318
chr8_ref v2	FLO5	Gene	525398..528625	/gene="FLO5"; /locus_tag="YHR211W"; /db_xref="GeneID:856618"	525398..528625	8	FALSE	80525398	80528625
chr9_ref v2	CCT2	Gene	83277..84860	/gene="CCT2"; /locus_tag="YIL142W"; /synonym="TCP2, BIN3"; /db_xref="GeneID:854664"	83277..84860	9	FALSE	90083277	90084860
chr9_ref v2	PFK26	Gene	complement(163248..165731)	/gene="PFK26"; /locus_tag="YIL107C"; /db_xref="GeneID:854699"	163248..165731	9	TRUE	90163248	90165731
chr10_ref v2	CCT7	Gene	207667..209319	/gene="CCT7"; /locus_tag="YJL111W"; /synonym="TCP7"; /db_xref="GeneID:853333"	207667..209319	10	FALSE	100207667	100209319
chr10_ref v2	CCT3	Gene	407211..408815	/gene="CCT3"; /locus_tag="YJL014W"; /synonym="TCP3, BIN2"; /db_xref="GeneID:853438"	407211..408815	10	FALSE	100407211	100408815
chr10_ref v2	CCT8	Gene	complement(419610..421316)	/gene="CCT8"; /locus_tag="YJL008C"; /db_xref="GeneID:853447"	419610..421316	10	TRUE	100419610	100421316
chr10_ref v2	CCT5	Gene	555513..557201	/gene="CCT5"; /locus_tag="YJR064W"; /synonym="TCP5"; /db_xref="GeneID:853527"	555513..557201	10	FALSE	100555513	100557201
chr11_ref v2	FLO10	Gene	645988..649497	/gene="FLO10"; /locus_tag="YKR102W"; /db_xref="GeneID:853977"	645988..649497	11	FALSE	110645988	110649497
chr12_ref v2	ROM2	Gene	862625..866695	/gene="ROM2"; /locus_tag="YLR371W"; /db_xref="GeneID:851086"	862625..866695	12	FALSE	120862625	120866695
chr13_ref v2	PFK2	Gene	complement(671881..674760)	/gene="PFK2"; /locus_tag="YMR205C"; /db_xref="GeneID:855245"	671881..674760	13	TRUE	130671881	130674760
chr14_ref v2	YCK2	Gene	complement(343591..345231)	/gene="YCK2"; /locus_tag="YNL154C"; /db_xref="GeneID:855568"	343591..345231	14	TRUE	140343591	140345231
chr15_ref v2	PFK27	Gene	complement(67561..68754)	/gene="PFK27"; /locus_tag="YOL136C"; /db_xref="GeneID:853984"	67561..68754	15	TRUE	150067561	150068754
chr1_ref v2	YALWDELTA1	LTR	22232..22554	/experiment="experimental evidence, no additional details recorded"; /note="YALWDELTA1"; /db_xref="SGD:S000006787"	22232..22554	1	FALSE	10022232	10022554
chr1_ref v2	YALCDELTA2	LTR	complement(138543..138704)	/experiment="experimental evidence, no additional details recorded"; /note="YALCDELTA2"; /db_xref="SGD:S000006786"	138543..138704	1	TRUE	10138543	10138704
chr1_ref v2	YARCDELTA3	LTR	complement(159817..159949)	/experiment="experimental evidence, no additional details recorded"; /note="YARCDELTA3"; /db_xref="SGD:S000006788"	159817..159949	1	TRUE	10159817	10159949
chr1_ref v2	YARCDELTA4	LTR	complement(159950..160286)	/experiment="experimental evidence, no additional details recorded"; /note="YARCDELTA4"; /db_xref="SGD:S000006789"	159950..160286	1	TRUE	10159950	10160286
chr1_ref v2	YARCDELTA5	LTR	complement(165538..165874)	/experiment="experimental evidence, no additional details recorded"; /note="YARCDELTA5"; /db_xref="SGD:S000006790"	165538..165874	1	TRUE	10165538	10165874
chr1_ref v2	YARWSIGMA1	LTR	182332..182671	/experiment="experimental evidence, no additional details recorded"; /note="YARWSIGMA1"; /db_xref="SGD:S000006795"	182332..182671	1	FALSE	10182332	10182671
chr1_ref v2	YARWDELTA6	LTR	182854..183185	/experiment="experimental evidence, no additional details recorded"; /note="YARWDELTA6"; /db_xref="SGD:S000006793"	182854..183185	1	FALSE	10182854	10183185
chr1_ref v2	YARWDELTA7	LTR	189137..189468	/experiment="experimental evidence, no additional details recorded"; /note="YARWDELTA7"; /db_xref="SGD:S000006794"	189137..189468	1	FALSE	10189137	10189468
chr1_ref v2	YARCDELTA8	LTR	complement(205468..205798)	/experiment="experimental evidence, no additional details recorded"; /note="YARCDELTA8"; /db_xref="SGD:S000006791"	205468..205798	1	TRUE	10205468	10205798
chr2_ref v2	YBLWDELTA1	LTR	8846..9090	/experiment="experimental evidence, no additional details recorded"; /note="YBLWDELTA1"; /db_xref="SGD:S000006798"	8846..9090	2	FALSE	20008846	20009090
chr2_ref v2	YBLWDELTA2	LTR	9091..9422	/experiment="experimental evidence, no additional details recorded"; /note="YBLWDELTA2"; /db_xref="SGD:S000006799"	9091..9422	2	FALSE	20009091	20009422
chr2_ref v2	YBLWDELTA3	LTR	9423..9516	/experiment="experimental evidence, no additional details recorded"; /note="YBLWDELTA3"; /db_xref="SGD:S000006800"	9423..9516	2	FALSE	20009423	20009516
chr2_ref v2	YBLWDELTA4	LTR	29642..29973	/experiment="experimental evidence, no additional details recorded"; /note="YBLWDELTA4"; /db_xref="SGD:S000006801"	29642..29973	2	FALSE	20029642	20029973
chr2_ref v2	YBLWDELTA5	LTR	35269..35600	/experiment="experimental evidence, no additional details recorded"; /note="YBLWDELTA5"; /db_xref="SGD:S000006802"	35269..35600	2	FALSE	20035269	20035600
chr2_ref v2	YBLWDELTA6	LTR	35602..35794	/experiment="experimental evidence, no additional details recorded"; /note="YBLWDELTA6"; /db_xref="SGD:S000006803"	35602..35794	2	FALSE	20035602	20035794
chr2_ref v2	YBLCTAU1	LTR	complement(35849..36219)	/experiment="experimental evidence, no additional details recorded"; /note="YBLCTAU1"; /db_xref="SGD:S000006807"	35849..36219	2	TRUE	20035849	20036219
chr2_ref v2	YBLCDELTA7	LTR	complement(197007..197311)	/experiment="experimental evidence, no additional details recorded"; /note="YBLCDELTA7"; /db_xref="SGD:S000006796"	197007..197311	2	TRUE	20197007	20197311
chr2_ref v2	YBLWSIGMA1	LTR	197705..198045	/experiment="experimental evidence, no additional details recorded"; /note="YBLWSIGMA1"; /db_xref="SGD:S000006797"	197705..198045	2	FALSE	20197705	20198045
chr2_ref v2	YBLWDELTA8	LTR	220886..221027	/experiment="experimental evidence, no additional details recorded"; /note="YBLWDELTA8"; /db_xref="SGD:S000006804"	220886..221027	2	FALSE	20220886	20221027
chr2_ref v2	YBLWDELTA9	LTR	221028..221357	/experiment="experimental evidence, no additional details recorded"; /note="YBLWDELTA9"; /db_xref="SGD:S000006805"	221028..221357	2	FALSE	20221028	20221357
chr2_ref v2	YBLWDELTA10	LTR	226602..226933	/experiment="experimental evidence, no additional details recorded"; /note="YBLWDELTA10"; /db_xref="SGD:S000006806"	226602..226933	2	FALSE	20226602	20226933
chr2_ref v2	YBRCDELTA11	LTR	complement(258651..258957)	/experiment="experimental evidence, no additional details recorded"; /note="YBRCDELTA11"; /db_xref="SGD:S000006810"	258651..258957	2	TRUE	20258651	20258957
chr2_ref v2	YBRWDELTA12	LTR	259559..259890	/experiment="experimental evidence, no additional details recorded"; /note="YBRWDELTA12"; /db_xref="SGD:S000006815"	259559..259890	2	FALSE	20259559	20259890
chr2_ref v2	YBRWDELTA13	LTR	265142..265473	/experiment="experimental evidence, no additional details recorded"; /note="YBRWDELTA13"; /db_xref="SGD:S000006816"	265142..265473	2	FALSE	20265142	20265473
chr2_ref v2	YBRCDELTA14	LTR	complement(266157..266235)	/experiment="experimental evidence, no additional details recorded"; /note="YBRCDELTA14"; /db_xref="SGD:S000006811"	266157..266235	2	TRUE	20266157	20266235
chr2_ref v2	YBRWDELTA15	LTR	327048..327373	/experiment="experimental evidence, no additional details recorded"; /note="YBRWDELTA15"; /db_xref="SGD:S000006817"	327048..327373	2	FALSE	20327048	20327373
chr2_ref v2	YBRWDELTA16	LTR	327369..327683	/experiment="experimental evidence, no additional details recorded"; /note="YBRWDELTA16"; /db_xref="SGD:S000006818"	327369..327683	2	FALSE	20327369	20327683
chr2_ref v2	YBRWDELTA17	LTR	350438..350730	/experiment="experimental evidence, no additional details recorded"; /note="YBRWDELTA17"; /db_xref="SGD:S000006819"	350438..350730	2	FALSE	20350438	20350730
chr2_ref v2	YBRCTAU2	LTR	complement(643455..643825)	/experiment="experimental evidence, no additional details recorded"; /note="YBRCTAU2"; /db_xref="SGD:S000006820"	643455..643825	2	TRUE	20643455	20643825
chr2_ref v2	YBRWDELTA18	LTR	643826..643969	/experiment="experimental evidence, no additional details recorded"; /note="YBRWDELTA18"; /db_xref="SGD:S000006812"	643826..643969	2	FALSE	20643826	20643969
chr2_ref v2	YBRCDELTA19	LTR	complement(644329..644570)	/experiment="experimental evidence, no additional details recorded"; /note="YBRCDELTA19"; /db_xref="SGD:S000006813"	644329..644570	2	TRUE	20644329	20644570
chr3_ref v2	YCLWOMEGA1	LTR	1165..1321	/experiment="experimental evidence, no additional details recorded"; /note="YCLWOMEGA1"; /db_xref="SGD:S000006828"	1165..1321	3	FALSE	30001165	30001321
chr3_ref v2	YCLWOMEGA2	LTR	3963..4212	/experiment="experimental evidence, no additional details recorded"; /note="YCLWOMEGA2"; /db_xref="SGD:S000006829"	3963..4212	3	FALSE	30003963	30004212
chr3_ref v2	YCLCDELTA1	LTR	complement(82936..83075)	/experiment="experimental evidence, no additional details recorded"; /note="YCLCDELTA1"; /db_xref="SGD:S000006822"	82936..83075	3	TRUE	30082936	30083075
chr3_ref v2	YCLWDELTA2A	LTR	83950..84175	/experiment="experimental evidence, no additional details recorded"; /note="YCLWDELTA2A"; /db_xref="SGD:S000006823"	83950..84175	3	FALSE	30083950	30084175
chr3_ref v2	YCLWDELTA3	LTR	84176..84507	/experiment="experimental evidence, no additional details recorded"; /note="YCLWDELTA3"; /db_xref="SGD:S000006825"	84176..84507	3	FALSE	30084176	30084507
chr3_ref v2	YCLWDELTA2B	LTR	84511..84599	/experiment="experimental evidence, no additional details recorded"; /note="YCLWDELTA2B"; /db_xref="SGD:S000006824"	84511..84599	3	FALSE	30084511	30084599
chr3_ref v2	YCLWDELTA4	LTR	84692..85023	/experiment="experimental evidence, no additional details recorded"; /note="YCLWDELTA4"; /db_xref="SGD:S000006826"	84692..85023	3	FALSE	30084692	30085023
chr3_ref v2	YCLWDELTA5	LTR	90319..90650	/experiment="experimental evidence, no additional details recorded"; /note="YCLWDELTA5"; /db_xref="SGD:S000006827"	90319..90650	3	FALSE	30090319	30090650
chr3_ref v2	YCRCDELTA6	LTR	complement(122479..122810)	/experiment="experimental evidence, no additional details recorded"; /note="YCRCDELTA6"; /db_xref="SGD:S000006832"	122479..122810	3	TRUE	30122479	30122810
chr3_ref v2	YCRCDELTA7	LTR	complement(141103..141425)	/experiment="experimental evidence, no additional details recorded"; /note="YCRCDELTA7"; /db_xref="SGD:S000006833"	141103..141425	3	TRUE	30141103	30141425
chr3_ref v2	YCRWDELTA8	LTR	146989..147163	/experiment="experimental evidence, no additional details recorded"; /note="YCRWDELTA8"; /db_xref="SGD:S000006835"	146989..147163	3	FALSE	30146989	30147163
chr3_ref v2	YCRCTAU1	LTR	147229..147250	/experiment="experimental evidence, no additional details recorded"; /note="YCRCTAU1"; /db_xref="SGD:S000007429"	147229..147250	3	FALSE	30147229	30147250
chr3_ref v2	YCRWDELTA10	LTR	147349..147679	/experiment="experimental evidence, no additional details recorded"; /note="YCRWDELTA10"; /db_xref="SGD:S000006837"	147349..147679	3	FALSE	30147349	30147679
chr3_ref v2	YCRWDELTA11	LTR	165402..165717	/experiment="experimental evidence, no additional details recorded"; /note="YCRWDELTA11"; /db_xref="SGD:S000006838"	165402..165717	3	FALSE	30165402	30165717
chr3_ref v2	YCRWDELTA12	LTR	287203..287542	/experiment="experimental evidence, no additional details recorded"; /note="YCRWDELTA12"; /db_xref="SGD:S000006839"	287203..287542	3	FALSE	30287203	30287542
chr3_ref v2	YCRWOMEGA3	LTR	287752..287997	/experiment="experimental evidence, no additional details recorded"; /note="YCRWOMEGA3"; /db_xref="SGD:S000006841"	287752..287997	3	FALSE	30287752	30287997
chr3_ref v2	YCRWDELTA13	LTR	290833..291160	/experiment="experimental evidence, no additional details recorded"; /note="YCRWDELTA13"; /db_xref="SGD:S000006840"	290833..291160	3	FALSE	30290833	30291160
chr3_ref v2	YCRCDELTA14	LTR	complement(291788..292020)	/experiment="experimental evidence, no additional details recorded"; /note="YCRCDELTA14"; /db_xref="SGD:S000006834"	291788..292020	3	TRUE	30291788	30292020
chr4_ref v2	YDLCDELTA1	LTR	complement(434361..434677)	/experiment="experimental evidence, no additional details recorded"; /note="YDLCDELTA1"; /db_xref="SGD:S000006842"	434361..434677	4	TRUE	40434361	40434677
chr4_ref v2	YDLWTAU1	LTR	437087..437456	/experiment="experimental evidence, no additional details recorded"; /note="YDLWTAU1"; /db_xref="SGD:S000006843"	437087..437456	4	FALSE	40437087	40437456
chr4_ref v2	YDRCDELTA2	LTR	complement(512925..513197)	/experiment="experimental evidence, no additional details recorded"; /note="YDRCDELTA2"; /db_xref="SGD:S000006844"	512925..513197	4	TRUE	40512925	40513197
chr4_ref v2	YDRCDELTA3	LTR	complement(513198..513529)	/experiment="experimental evidence, no additional details recorded"; /note="YDRCDELTA3"; /db_xref="SGD:S000006845"	513198..513529	4	TRUE	40513198	40513529
chr4_ref v2	YDRCDELTA4	LTR	complement(513631..513959)	/experiment="experimental evidence, no additional details recorded"; /note="YDRCDELTA4"; /db_xref="SGD:S000006846"	513631..513959	4	TRUE	40513631	40513959
chr4_ref v2	YDRCDELTA5	LTR	complement(519255..519586)	/experiment="experimental evidence, no additional details recorded"; /note="YDRCDELTA5"; /db_xref="SGD:S000006847"	519255..519586	4	TRUE	40519255	40519586
chr4_ref v2	YDRCDELTA6A	LTR	complement(520112..520414)	/experiment="experimental evidence, no additional details recorded"; /note="YDRCDELTA6A"; /db_xref="SGD:S000006848"	520112..520414	4	TRUE	40520112	40520414
chr4_ref v2	YDRWDELTA7	LTR	520416..520744	/experiment="experimental evidence, no additional details recorded"; /note="YDRWDELTA7"; /db_xref="SGD:S000006863"	520416..520744	4	FALSE	40520416	40520744
chr4_ref v2	YDRCDELTA6B	LTR	complement(520745..520772)	/experiment="experimental evidence, no additional details recorded"; /note="YDRCDELTA6B"; /db_xref="SGD:S000006849"	520745..520772	4	TRUE	40520745	40520772
chr4_ref v2	YDRCDELTA7	LTR	complement(645417..645750)	/experiment="experimental evidence, no additional details recorded"; /note="YDRCDELTA7"; /db_xref="SGD:S000006850"	645417..645750	4	TRUE	40645417	40645750
chr4_ref v2	YDRCDELTA8	LTR	complement(651001..651334)	/experiment="experimental evidence, no additional details recorded"; /note="YDRCDELTA8"; /db_xref="SGD:S000006851"	651001..651334	4	TRUE	40651001	40651334
chr4_ref v2	YDRCSIGMA1	LTR	complement(651335..651418)	/experiment="experimental evidence, no additional details recorded"; /note="YDRCSIGMA1"; /db_xref="SGD:S000006855"	651335..651418	4	TRUE	40651335	40651418
chr4_ref v2	YDRCDELTA9	LTR	complement(651597..651895)	/experiment="experimental evidence, no additional details recorded"; /note="YDRCDELTA9"; /db_xref="SGD:S000006852"	651597..651895	4	TRUE	40651597	40651895
chr4_ref v2	YDRWSIGMA2	LTR	668011..668351	/experiment="experimental evidence, no additional details recorded"; /note="YDRWSIGMA2"; /db_xref="SGD:S000006856"	668011..668351	4	FALSE	40668011	40668351
chr4_ref v2	YDRWDELTA10	LTR	668458..668699	/experiment="experimental evidence, no additional details recorded"; /note="YDRWDELTA10"; /db_xref="SGD:S000006864"	668458..668699	4	FALSE	40668458	40668699
chr4_ref v2	YDRWDELTA11	LTR	802806..803136	/experiment="experimental evidence, no additional details recorded"; /note="YDRWDELTA11"; /db_xref="SGD:S000006865"	802806..803136	4	FALSE	40802806	40803136
chr4_ref v2	YDRWDELTA13	LTR	871723..872054	/experiment="experimental evidence, no additional details recorded"; /note="YDRWDELTA13"; /db_xref="SGD:S000006867"	871723..872054	4	FALSE	40871723	40872054
chr4_ref v2	YDRWDELTA14	LTR	877350..877681	/experiment="experimental evidence, no additional details recorded"; /note="YDRWDELTA14"; /db_xref="SGD:S000006868"	877350..877681	4	FALSE	40877350	40877681
chr4_ref v2	YDRWDELTA12	LTR	945253..945575	/experiment="experimental evidence, no additional details recorded"; /note="YDRWDELTA12"; /db_xref="SGD:S000006866"	945253..945575	4	FALSE	40945253	40945575
chr4_ref v2	YDRCSIGMA3	LTR	complement(945857..946197)	/experiment="experimental evidence, no additional details recorded"; /note="YDRCSIGMA3"; /db_xref="SGD:S000006857"	945857..946197	4	TRUE	40945857	40946197
chr4_ref v2	YDRWDELTA19	LTR	981073..981404	/experiment="experimental evidence, no additional details recorded"; /note="YDRWDELTA19"; /db_xref="SGD:S000006869"	981073..981404	4	FALSE	40981073	40981404
chr4_ref v2	YDRWDELTA20	LTR	986696..987027	/experiment="experimental evidence, no additional details recorded"; /note="YDRWDELTA20"; /db_xref="SGD:S000006870"	986696..987027	4	FALSE	40986696	40987027
chr4_ref v2	YDRCDELTA21	LTR	complement(987052..987385)	/experiment="experimental evidence, no additional details recorded"; /note="YDRCDELTA21"; /db_xref="SGD:S000006853"	987052..987385	4	TRUE	40987052	40987385
chr4_ref v2	YDRCDELTA22	LTR	complement(992211..992544)	/experiment="experimental evidence, no additional details recorded"; /note="YDRCDELTA22"; /db_xref="SGD:S000006854"	992211..992544	4	TRUE	40992211	40992544
chr4_ref v2	YDRCSIGMA4	LTR	complement(992642..992717)	/experiment="experimental evidence, no additional details recorded"; /note="YDRCSIGMA4"; /db_xref="SGD:S000006880"	992642..992717	4	TRUE	40992642	40992717
chr4_ref v2	YDRWSIGMA5	LTR	1023040..1023380	/experiment="experimental evidence, no additional details recorded"; /note="YDRWSIGMA5"; /db_xref="SGD:S000006881"	1023040..1023380	4	FALSE	41023040	41023380
chr4_ref v2	YDRWDELTA23	LTR	1095670..1096007	/experiment="experimental evidence, no additional details recorded"; /note="YDRWDELTA23"; /db_xref="SGD:S000006871"	1095670..1096007	4	FALSE	41095670	41096007
chr4_ref v2	YDRWDELTA24	LTR	1101258..1101595	/experiment="experimental evidence, no additional details recorded"; /note="YDRWDELTA24"; /db_xref="SGD:S000006872"	1101258..1101595	4	FALSE	41101258	41101595
chr4_ref v2	YDRWDELTA25	LTR	1150943..1151272	/experiment="experimental evidence, no additional details recorded"; /note="YDRWDELTA25"; /db_xref="SGD:S000006873"	1150943..1151272	4	FALSE	41150943	41151272
chr4_ref v2	YDRCSIGMA6	LTR	complement(1175038..1175716)	/experiment="experimental evidence, no additional details recorded"; /note="YDRCSIGMA6"; /db_xref="SGD:S000006858"	1175038..1175716	4	TRUE	41175038	41175716
chr4_ref v2	YDRWDELTA26	LTR	1175220..1175551	/experiment="experimental evidence, no additional details recorded"; /note="YDRWDELTA26"; /db_xref="SGD:S000006874"	1175220..1175551	4	FALSE	41175220	41175551
chr4_ref v2	YDRWDELTA27	LTR	1206608..1206941	/experiment="experimental evidence, no additional details recorded"; /note="YDRWDELTA27"; /db_xref="SGD:S000006875"	1206608..1206941	4	FALSE	41206608	41206941
chr4_ref v2	YDRWDELTA28	LTR	1212192..1212525	/experiment="experimental evidence, no additional details recorded"; /note="YDRWDELTA28"; /db_xref="SGD:S000006876"	1212192..1212525	4	FALSE	41212192	41212525
chr4_ref v2	YDRWDELTA29	LTR	1352547..1352878	/experiment="experimental evidence, no additional details recorded"; /note="YDRWDELTA29"; /db_xref="SGD:S000006877"	1352547..1352878	4	FALSE	41352547	41352878
chr4_ref v2	YDRWDELTA30	LTR	1352879..1353129	/experiment="experimental evidence, no additional details recorded"; /note="YDRWDELTA30"; /db_xref="SGD:S000006878"	1352879..1353129	4	FALSE	41352879	41353129
chr4_ref v2	YDRWDELTA31	LTR	1518347..1518670	/experiment="experimental evidence, no additional details recorded"; /note="YDRWDELTA31"; /db_xref="SGD:S000006879"	1518347..1518670	4	FALSE	41518347	41518670
chr5_ref v2	YELWDELTA1	LTR	62081..62756	/experiment="experimental evidence, no additional details recorded"; /note="YELWDELTA1"; /db_xref="SGD:S000006889"	62081..62756	5	FALSE	50062081	50062756
chr5_ref v2	YELWDELTA2	LTR	62142..62474	/experiment="experimental evidence, no additional details recorded"; /note="YELWDELTA2"; /db_xref="SGD:S000006890"	62142..62474	5	FALSE	50062142	50062474
chr5_ref v2	YELCDELTA3	LTR	complement(99489..99663)	/experiment="experimental evidence, no additional details recorded"; /note="YELCDELTA3"; /db_xref="SGD:S000006886"	99489..99663	5	TRUE	50099489	50099663
chr5_ref v2	YELCTAU1	LTR	complement(117132..117453)	/experiment="experimental evidence, no additional details recorded"; /note="YELCTAU1"; /db_xref="SGD:S000006888"	117132..117453	5	TRUE	50117132	50117453
chr5_ref v2	YELCDELTA4	LTR	complement(134514..134841)	/experiment="experimental evidence, no additional details recorded"; /note="YELCDELTA4"; /db_xref="SGD:S000006887"	134514..134841	5	TRUE	50134514	50134841
chr5_ref v2	YELWDELTA5	LTR	136226..136541	/experiment="experimental evidence, no additional details recorded"; /note="YELWDELTA5"; /db_xref="SGD:S000006891"	136226..136541	5	FALSE	50136226	50136541
chr5_ref v2	YELWDELTA6	LTR	137123..137455	/experiment="experimental evidence, no additional details recorded"; /note="YELWDELTA6"; /db_xref="SGD:S000006892"	137123..137455	5	FALSE	50137123	50137455
chr5_ref v2	YERWDELTA7	LTR	175607..175758	/experiment="experimental evidence, no additional details recorded"; /note="YERWDELTA7"; /db_xref="SGD:S000006912"	175607..175758	5	FALSE	50175607	50175758
chr5_ref v2	YERCDELTA8	LTR	complement(248002..248224)	/experiment="experimental evidence, no additional details recorded"; /note="YERCDELTA8"; /db_xref="SGD:S000006893"	248002..248224	5	TRUE	50248002	50248224
chr5_ref v2	YERWDELTA9	LTR	248338..248645	/experiment="experimental evidence, no additional details recorded"; /note="YERWDELTA9"; /db_xref="SGD:S000006913"	248338..248645	5	FALSE	50248338	50248645
chr5_ref v2	YERCSIGMA1	LTR	complement(248823..249163)	/experiment="experimental evidence, no additional details recorded"; /note="YERCSIGMA1"; /db_xref="SGD:S000006904"	248823..249163	5	TRUE	50248823	50249163
chr5_ref v2	YERCDELTA10	LTR	complement(286637..286954)	/experiment="experimental evidence, no additional details recorded"; /note="YERCDELTA10"; /db_xref="SGD:S000006894"	286637..286954	5	TRUE	50286637	50286954
chr5_ref v2	YERWDELTA11	LTR	311166..311337	/experiment="experimental evidence, no additional details recorded"; /note="YERWDELTA11"; /db_xref="SGD:S000006914"	311166..311337	5	FALSE	50311166	50311337
chr5_ref v2	YERWDELTA12	LTR	352291..352627	/experiment="experimental evidence, no additional details recorded"; /note="YERWDELTA12"; /db_xref="SGD:S000006915"	352291..352627	5	FALSE	50352291	50352627
chr5_ref v2	YERWDELTA13	LTR	353028..353742	/experiment="experimental evidence, no additional details recorded"; /note="YERWDELTA13"; /db_xref="SGD:S000006916"	353028..353742	5	FALSE	50353028	50353742
chr5_ref v2	YERCTAU2	LTR	complement(353252..353622)	/experiment="experimental evidence, no additional details recorded"; /note="YERCTAU2"; /db_xref="SGD:S000006908"	353252..353622	5	TRUE	50353252	50353622
chr5_ref v2	YERCSIGMA2	LTR	complement(353743..353809)	/experiment="experimental evidence, no additional details recorded"; /note="YERCSIGMA2"; /db_xref="SGD:S000006905"	353743..353809	5	TRUE	50353743	50353809
chr5_ref v2	YERCDELTA14	LTR	complement(430336..430668)	/experiment="experimental evidence, no additional details recorded"; /note="YERCDELTA14"; /db_xref="SGD:S000006895"	430336..430668	5	TRUE	50430336	50430668
chr5_ref v2	YERCSIGMA3	LTR	complement(433476..433816)	/experiment="experimental evidence, no additional details recorded"; /note="YERCSIGMA3"; /db_xref="SGD:S000006906"	433476..433816	5	TRUE	50433476	50433816
chr5_ref v2	YERCDELTA15	LTR	complement(433973..434292)	/experiment="experimental evidence, no additional details recorded"; /note="YERCDELTA15"; /db_xref="SGD:S000006896"	433973..434292	5	TRUE	50433973	50434292
chr5_ref v2	YERCDELTA16	LTR	complement(434791..435122)	/experiment="experimental evidence, no additional details recorded"; /note="YERCDELTA16"; /db_xref="SGD:S000006897"	434791..435122	5	TRUE	50434791	50435122
chr5_ref v2	YERCTAU3	LTR	complement(435124..435450)	/experiment="experimental evidence, no additional details recorded"; /note="YERCTAU3"; /db_xref="SGD:S000006909"	435124..435450	5	TRUE	50435124	50435450
chr5_ref v2	YERWDELTA17	LTR	441579..441917	/experiment="experimental evidence, no additional details recorded"; /note="YERWDELTA17"; /db_xref="SGD:S000006917"	441579..441917	5	FALSE	50441579	50441917
chr5_ref v2	YERCDELTA19	LTR	complement(442242..442578)	/experiment="experimental evidence, no additional details recorded"; /note="YERCDELTA19"; /db_xref="SGD:S000006898"	442242..442578	5	TRUE	50442242	50442578
chr5_ref v2	YERWDELTA21	LTR	443679..443984	/experiment="experimental evidence, no additional details recorded"; /note="YERWDELTA21"; /db_xref="SGD:S000006919"	443679..443984	5	FALSE	50443679	50443984
chr5_ref v2	YERCDELTA20	LTR	complement(447829..448165)	/experiment="experimental evidence, no additional details recorded"; /note="YERCDELTA20"; /db_xref="SGD:S000006899"	447829..448165	5	TRUE	50447829	50448165
chr5_ref v2	YERWDELTA22	LTR	486679..487010	/experiment="experimental evidence, no additional details recorded"; /note="YERWDELTA22"; /db_xref="SGD:S000006920"	486679..487010	5	FALSE	50486679	50487010
chr5_ref v2	YERCDELTA23	LTR	complement(491540..491678)	/experiment="experimental evidence, no additional details recorded"; /note="YERCDELTA23"; /db_xref="SGD:S000006900"	491540..491678	5	TRUE	50491540	50491678
chr5_ref v2	YERCDELTA24	LTR	complement(496929..497266)	/experiment="experimental evidence, no additional details recorded"; /note="YERCDELTA24"; /db_xref="SGD:S000006901"	496929..497266	5	TRUE	50496929	50497266
chr5_ref v2	YERWDELTA25	LTR	550287..550618	/experiment="experimental evidence, no additional details recorded"; /note="YERWDELTA25"; /db_xref="SGD:S000006921"	550287..550618	5	FALSE	50550287	50550618
chr5_ref v2	YERCDELTA26	LTR	complement(550885..551112)	/experiment="experimental evidence, no additional details recorded"; /note="YERCDELTA26"; /db_xref="SGD:S000006902"	550885..551112	5	TRUE	50550885	50551112
chr5_ref v2	YERCOMEGA1	LTR	complement(562773..562869)	/experiment="experimental evidence, no additional details recorded"; /note="YERCOMEGA1"; /db_xref="SGD:S000006903"	562773..562869	5	TRUE	50562773	50562869
chr5_ref v2	YERWOMEGA2	LTR	567636..567869	/experiment="experimental evidence, no additional details recorded"; /note="YERWOMEGA2"; /db_xref="SGD:S000006922"	567636..567869	5	FALSE	50567636	50567869
chr6_ref v2	YFLWDELTA1	LTR	100583..100903	/experiment="experimental evidence, no additional details recorded"; /note="YFLWDELTA1"; /db_xref="SGD:S000006924"	100583..100903	6	FALSE	60100583	60100903
chr6_ref v2	YFLWDELTA2	LTR	137665..137914	/experiment="experimental evidence, no additional details recorded"; /note="YFLWDELTA2"; /db_xref="SGD:S000006925"	137665..137914	6	FALSE	60137665	60137914
chr6_ref v2	YFLWDELTA3	LTR	137915..138242	/experiment="experimental evidence, no additional details recorded"; /note="YFLWDELTA3"; /db_xref="SGD:S000006926"	137915..138242	6	FALSE	60137915	60138242
chr6_ref v2	YFLWDELTA4	LTR	143542..143873	/experiment="experimental evidence, no additional details recorded"; /note="YFLWDELTA4"; /db_xref="SGD:S000006927"	143542..143873	6	FALSE	60143542	60143873
chr6_ref v2	YFLWDELTA5	LTR	143874..143949	/experiment="experimental evidence, no additional details recorded"; /note="YFLWDELTA5"; /db_xref="SGD:S000006928"	143874..143949	6	FALSE	60143874	60143949
chr6_ref v2	YFLWTAU1	LTR	144205..144525	/experiment="experimental evidence, no additional details recorded"; /note="YFLWTAU1"; /db_xref="SGD:S000006929"	144205..144525	6	FALSE	60144205	60144525
chr6_ref v2	YFLCDELTA6	LTR	complement(144526..144824)	/experiment="experimental evidence, no additional details recorded"; /note="YFLCDELTA6"; /db_xref="SGD:S000006923"	144526..144824	6	TRUE	60144526	60144824
chr6_ref v2	YFRWDELTA7	LTR	158377..158687	/experiment="experimental evidence, no additional details recorded"; /note="YFRWDELTA7"; /db_xref="SGD:S000006933"	158377..158687	6	FALSE	60158377	60158687
chr6_ref v2	YFRCDELTA8	LTR	complement(161805..162136)	/experiment="experimental evidence, no additional details recorded"; /note="YFRCDELTA8"; /db_xref="SGD:S000006931"	161805..162136	6	TRUE	60161805	60162136
chr6_ref v2	YFRCDELTA9	LTR	complement(191686..191855)	/experiment="experimental evidence, no additional details recorded"; /note="YFRCDELTA9"; /db_xref="SGD:S000006932"	191686..191855	6	TRUE	60191686	60191855
chr6_ref v2	YFRWDELTA10	LTR	206923..207139	/experiment="experimental evidence, no additional details recorded"; /note="YFRWDELTA10"; /db_xref="SGD:S000006934"	206923..207139	6	FALSE	60206923	60207139
chr7_ref v2	YGLWOMEGA1	LTR	838..1079	/experiment="experimental evidence, no additional details recorded"; /note="YGLWOMEGA1"; /db_xref="SGD:S000006948"	838..1079	7	FALSE	70000838	70001079
chr7_ref v2	YGLWTAU1	LTR	110856..111226	/experiment="experimental evidence, no additional details recorded"; /note="YGLWTAU1"; /db_xref="SGD:S000006950"	110856..111226	7	FALSE	70110856	70111226
chr7_ref v2	YGLCDELTA1	LTR	complement(111227..111506)	/experiment="experimental evidence, no additional details recorded"; /note="YGLCDELTA1"; /db_xref="SGD:S000006935"	111227..111506	7	TRUE	70111227	70111506
chr7_ref v2	YGLWDELTA2	LTR	111507..111699	/experiment="experimental evidence, no additional details recorded"; /note="YGLWDELTA2"; /db_xref="SGD:S000006940"	111507..111699	7	FALSE	70111507	70111699
chr7_ref v2	YGLWDELTA3	LTR	114940..115270	/experiment="experimental evidence, no additional details recorded"; /note="YGLWDELTA3"; /db_xref="SGD:S000006941"	114940..115270	7	FALSE	70114940	70115270
chr7_ref v2	YGLWTAU2	LTR	204983..205338	/experiment="experimental evidence, no additional details recorded"; /note="YGLWTAU2"; /db_xref="SGD:S000006951"	204983..205338	7	FALSE	70204983	70205338
chr7_ref v2	YGLWDELTA4	LTR	318692..318855	/experiment="experimental evidence, no additional details recorded"; /note="YGLWDELTA4"; /db_xref="SGD:S000006942"	318692..318855	7	FALSE	70318692	70318855
chr7_ref v2	YGLCDELTA5	LTR	complement(319004..319336)	/experiment="experimental evidence, no additional details recorded"; /note="YGLCDELTA5"; /db_xref="SGD:S000006936"	319004..319336	7	TRUE	70319004	70319336
chr7_ref v2	YGLCSIGMA1	LTR	complement(319418..319757)	/experiment="experimental evidence, no additional details recorded"; /note="YGLCSIGMA1"; /db_xref="SGD:S000006937"	319418..319757	7	TRUE	70319418	70319757
chr7_ref v2	YGLCTAU3	LTR	complement(320350..320702)	/experiment="experimental evidence, no additional details recorded"; /note="YGLCTAU3"; /db_xref="SGD:S000006939"	320350..320702	7	TRUE	70320350	70320702
chr7_ref v2	YGLWDELTA6	LTR	327899..328219	/experiment="experimental evidence, no additional details recorded"; /note="YGLWDELTA6"; /db_xref="SGD:S000006943"	327899..328219	7	FALSE	70327899	70328219
chr7_ref v2	YGLWSIGMA2	LTR	401611..401882	/experiment="experimental evidence, no additional details recorded"; /note="YGLWSIGMA2"; /db_xref="SGD:S000006949"	401611..401882	7	FALSE	70401611	70401882
chr7_ref v2	YGLWDELTA7	LTR	401947..402278	/experiment="experimental evidence, no additional details recorded"; /note="YGLWDELTA7"; /db_xref="SGD:S000006944"	401947..402278	7	FALSE	70401947	70402278
chr7_ref v2	YGLWDELTA8	LTR	404994..405134	/experiment="experimental evidence, no additional details recorded"; /note="YGLWDELTA8"; /db_xref="SGD:S000006945"	404994..405134	7	FALSE	70404994	70405134
chr7_ref v2	YGLWDELTA9	LTR	405135..405196	/experiment="experimental evidence, no additional details recorded"; /note="YGLWDELTA9"; /db_xref="SGD:S000006946"	405135..405196	7	FALSE	70405135	70405196
chr7_ref v2	YGLCSIGMA3	LTR	complement(405197..405442)	/experiment="experimental evidence, no additional details recorded"; /note="YGLCSIGMA3"; /db_xref="SGD:S000006938"	405197..405442	7	TRUE	70405197	70405442
chr7_ref v2	YGLWDELTA10	LTR	412445..412714	/experiment="experimental evidence, no additional details recorded"; /note="YGLWDELTA10"; /db_xref="SGD:S000006947"	412445..412714	7	FALSE	70412445	70412714
chr7_ref v2	YGRWDELTA11	LTR	535200..535531	/experiment="experimental evidence, no additional details recorded"; /note="YGRWDELTA11"; /db_xref="SGD:S000006965"	535200..535531	7	FALSE	70535200	70535531
chr7_ref v2	YGRCDELTA12	LTR	complement(535596..535748)	/experiment="experimental evidence, no additional details recorded"; /note="YGRCDELTA12"; /db_xref="SGD:S000006952"	535596..535748	7	TRUE	70535596	70535748
chr7_ref v2	YGRWDELTA13	LTR	535749..536086	/experiment="experimental evidence, no additional details recorded"; /note="YGRWDELTA13"; /db_xref="SGD:S000006966"	535749..536086	7	FALSE	70535749	70536086
chr7_ref v2	YGRWDELTA14	LTR	541337..541674	/experiment="experimental evidence, no additional details recorded"; /note="YGRWDELTA14"; /db_xref="SGD:S000006967"	541337..541674	7	FALSE	70541337	70541674
chr7_ref v2	YGRCDELTA15	LTR	complement(561832..562165)	/experiment="experimental evidence, no additional details recorded"; /note="YGRCDELTA15"; /db_xref="SGD:S000006953"	561832..562165	7	TRUE	70561832	70562165
chr7_ref v2	YGRCDELTA16	LTR	complement(567416..567749)	/experiment="experimental evidence, no additional details recorded"; /note="YGRCDELTA16"; /db_xref="SGD:S000006954"	567416..567749	7	TRUE	70567416	70567749
chr7_ref v2	YGRCDELTA17	LTR	complement(568729..569061)	/experiment="experimental evidence, no additional details recorded"; /note="YGRCDELTA17"; /db_xref="SGD:S000006955"	568729..569061	7	TRUE	70568729	70569061
chr7_ref v2	YGRCDELTA18	LTR	complement(574358..574689)	/experiment="experimental evidence, no additional details recorded"; /note="YGRCDELTA18"; /db_xref="SGD:S000006956"	574358..574689	7	TRUE	70574358	70574689
chr7_ref v2	YGRWDELTA19	LTR	701093..701339	/experiment="experimental evidence, no additional details recorded"; /note="YGRWDELTA19"; /db_xref="SGD:S000006968"	701093..701339	7	FALSE	70701093	70701339
chr7_ref v2	YGRWSIGMA4	LTR	707184..707523	/experiment="experimental evidence, no additional details recorded"; /note="YGRWSIGMA4"; /db_xref="SGD:S000006978"	707184..707523	7	FALSE	70707184	70707523
chr7_ref v2	YGRWSIGMA5	LTR	712120..712459	/experiment="experimental evidence, no additional details recorded"; /note="YGRWSIGMA5"; /db_xref="SGD:S000006979"	712120..712459	7	FALSE	70712120	70712459
chr7_ref v2	YGRCDELTA20	LTR	complement(712998..713298)	/experiment="experimental evidence, no additional details recorded"; /note="YGRCDELTA20"; /db_xref="SGD:S000006957"	712998..713298	7	TRUE	70712998	70713298
chr7_ref v2	YGRWDELTA21	LTR	735456..735786	/experiment="experimental evidence, no additional details recorded"; /note="YGRWDELTA21"; /db_xref="SGD:S000006969"	735456..735786	7	FALSE	70735456	70735786
chr7_ref v2	YGRWSIGMA6	LTR	735896..736236	/experiment="experimental evidence, no additional details recorded"; /note="YGRWSIGMA6"; /db_xref="SGD:S000006980"	735896..736236	7	FALSE	70735896	70736236
chr7_ref v2	YGRWDELTA22	LTR	773954..774076	/experiment="experimental evidence, no additional details recorded"; /note="YGRWDELTA22"; /db_xref="SGD:S000006970"	773954..774076	7	FALSE	70773954	70774076
chr7_ref v2	YGRWDELTA23	LTR	778698..779026	/experiment="experimental evidence, no additional details recorded"; /note="YGRWDELTA23"; /db_xref="SGD:S000006971"	778698..779026	7	FALSE	70778698	70779026
chr7_ref v2	YGRWDELTA24	LTR	779030..779138	/experiment="experimental evidence, no additional details recorded"; /note="YGRWDELTA24"; /db_xref="SGD:S000006972"	779030..779138	7	FALSE	70779030	70779138
chr7_ref v2	YGRCDELTA25	LTR	complement(779139..779429)	/experiment="experimental evidence, no additional details recorded"; /note="YGRCDELTA25"; /db_xref="SGD:S000006958"	779139..779429	7	TRUE	70779139	70779429
chr7_ref v2	YGRWDELTA26	LTR	793151..793473	/experiment="experimental evidence, no additional details recorded"; /note="YGRWDELTA26"; /db_xref="SGD:S000006973"	793151..793473	7	FALSE	70793151	70793473
chr7_ref v2	YGRWDELTA27	LTR	811361..811692	/experiment="experimental evidence, no additional details recorded"; /note="YGRWDELTA27"; /db_xref="SGD:S000006974"	811361..811692	7	FALSE	70811361	70811692
chr7_ref v2	YGRWDELTA28	LTR	816988..817311	/experiment="experimental evidence, no additional details recorded"; /note="YGRWDELTA28"; /db_xref="SGD:S000006975"	816988..817311	7	FALSE	70816988	70817311
chr7_ref v2	YGRCDELTA29	LTR	complement(817307..817638)	/experiment="experimental evidence, no additional details recorded"; /note="YGRCDELTA29"; /db_xref="SGD:S000006959"	817307..817638	7	TRUE	70817307	70817638
chr7_ref v2	YGRCDELTA30	LTR	complement(822889..823220)	/experiment="experimental evidence, no additional details recorded"; /note="YGRCDELTA30"; /db_xref="SGD:S000006960"	822889..823220	7	TRUE	70822889	70823220
chr7_ref v2	YGRWSIGMA7	LTR	845195..845516	/experiment="experimental evidence, no additional details recorded"; /note="YGRWSIGMA7"; /db_xref="SGD:S000006981"	845195..845516	7	FALSE	70845195	70845516
chr7_ref v2	YGRWDELTA31	LTR	875865..876193	/experiment="experimental evidence, no additional details recorded"; /note="YGRWDELTA31"; /db_xref="SGD:S000006976"	875865..876193	7	FALSE	70875865	70876193
chr7_ref v2	YGRCTAU3	LTR	complement(931085..931454)	/experiment="experimental evidence, no additional details recorded"; /note="YGRCTAU3"; /db_xref="SGD:S000006961"	931085..931454	7	TRUE	70931085	70931454
chr7_ref v2	YGRWDELTA32	LTR	931602..931933	/experiment="experimental evidence, no additional details recorded"; /note="YGRWDELTA32"; /db_xref="SGD:S000006977"	931602..931933	7	FALSE	70931602	70931933
chr8_ref v2	YHLCOMEGA1	LTR	complement(7995..8226)	/experiment="experimental evidence, no additional details recorded"; /note="YHLCOMEGA1"; /db_xref="SGD:S000006986"	7995..8226	8	TRUE	80007995	80008226
chr8_ref v2	YHLCSIGMA1	LTR	complement(85390..85538)	/experiment="experimental evidence, no additional details recorded"; /note="YHLCSIGMA1"; /db_xref="SGD:S000006987"	85390..85538	8	TRUE	80085390	80085538
chr8_ref v2	YHLWTAU1	LTR	85539..85909	/experiment="experimental evidence, no additional details recorded"; /note="YHLWTAU1"; /db_xref="SGD:S000006989"	85539..85909	8	FALSE	80085539	80085909
chr8_ref v2	YHLWTAU2	LTR	91391..91761	/experiment="experimental evidence, no additional details recorded"; /note="YHLWTAU2"; /db_xref="SGD:S000006990"	91391..91761	8	FALSE	80091391	80091761
chr8_ref v2	YHLCDELTA1	LTR	complement(91772..92099)	/experiment="experimental evidence, no additional details recorded"; /note="YHLCDELTA1"; /db_xref="SGD:S000006985"	91772..92099	8	TRUE	80091772	80092099
chr8_ref v2	YHLWDELTA2	LTR	92240..92390	/experiment="experimental evidence, no additional details recorded"; /note="YHLWDELTA2"; /db_xref="SGD:S000006988"	92240..92390	8	FALSE	80092240	80092390
chr8_ref v2	YHRCDELTA3	LTR	complement(116421..116752)	/experiment="experimental evidence, no additional details recorded"; /note="YHRCDELTA3"; /db_xref="SGD:S000006992"	116421..116752	8	TRUE	80116421	80116752
chr8_ref v2	YHRCDELTA4	LTR	complement(116763..117061)	/experiment="experimental evidence, no additional details recorded"; /note="YHRCDELTA4"; /db_xref="SGD:S000006993"	116763..117061	8	TRUE	80116763	80117061
chr8_ref v2	YHRCDELTA5	LTR	complement(133201..133442)	/experiment="experimental evidence, no additional details recorded"; /note="YHRCDELTA5"; /db_xref="SGD:S000006994"	133201..133442	8	TRUE	80133201	80133442
chr8_ref v2	YHRCDELTA6	LTR	complement(133565..133684)	/experiment="experimental evidence, no additional details recorded"; /note="YHRCDELTA6"; /db_xref="SGD:S000006995"	133565..133684	8	TRUE	80133565	80133684
chr8_ref v2	YHRWDELTA7	LTR	133685..134009	/experiment="experimental evidence, no additional details recorded"; /note="YHRWDELTA7"; /db_xref="SGD:S000007007"	133685..134009	8	FALSE	80133685	80134009
chr8_ref v2	YHRCSIGMA2	LTR	complement(146331..146671)	/experiment="experimental evidence, no additional details recorded"; /note="YHRCSIGMA2"; /db_xref="SGD:S000007003"	146331..146671	8	TRUE	80146331	80146671
chr8_ref v2	YHRWTAU3	LTR	146844..147114	/experiment="experimental evidence, no additional details recorded"; /note="YHRWTAU3"; /db_xref="SGD:S000007010"	146844..147114	8	FALSE	80146844	80147114
chr8_ref v2	YHRCDELTA8	LTR	complement(358680..358858)	/experiment="experimental evidence, no additional details recorded"; /note="YHRCDELTA8"; /db_xref="SGD:S000006996"	358680..358858	8	TRUE	80358680	80358858
chr8_ref v2	YHRCTAU4	LTR	complement(358858..359075)	/experiment="experimental evidence, no additional details recorded"; /note="YHRCTAU4"; /db_xref="SGD:S000007005"	358858..359075	8	TRUE	80358858	80359075
chr8_ref v2	YHRWDELTA9	LTR	359087..359380	/experiment="experimental evidence, no additional details recorded"; /note="YHRWDELTA9"; /db_xref="SGD:S000007008"	359087..359380	8	FALSE	80359087	80359380
chr8_ref v2	YHRCDELTA10	LTR	complement(389185..389517)	/experiment="experimental evidence, no additional details recorded"; /note="YHRCDELTA10"; /db_xref="SGD:S000006997"	389185..389517	8	TRUE	80389185	80389517
chr8_ref v2	YHRCDELTA11	LTR	complement(389621..389853)	/experiment="experimental evidence, no additional details recorded"; /note="YHRCDELTA11"; /db_xref="SGD:S000006998"	389621..389853	8	TRUE	80389621	80389853
chr8_ref v2	YHRCDELTA12	LTR	complement(463929..464156)	/experiment="experimental evidence, no additional details recorded"; /note="YHRCDELTA12"; /db_xref="SGD:S000006999"	463929..464156	8	TRUE	80463929	80464156
chr8_ref v2	YHRWDELTA13	LTR	466558..466872	/experiment="experimental evidence, no additional details recorded"; /note="YHRWDELTA13"; /db_xref="SGD:S000007009"	466558..466872	8	FALSE	80466558	80466872
chr8_ref v2	YHRCSIGMA3	LTR	complement(466893..466984)	/experiment="experimental evidence, no additional details recorded"; /note="YHRCSIGMA3"; /db_xref="SGD:S000007004"	466893..466984	8	TRUE	80466893	80466984
chr8_ref v2	YHRCDELTA14	LTR	complement(530055..530385)	/experiment="experimental evidence, no additional details recorded"; /note="YHRCDELTA14"; /db_xref="SGD:S000007000"	530055..530385	8	TRUE	80530055	80530385
chr8_ref v2	YHRCDELTA15	LTR	complement(543616..543947)	/experiment="experimental evidence, no additional details recorded"; /note="YHRCDELTA15"; /db_xref="SGD:S000007001"	543616..543947	8	TRUE	80543616	80543947
chr8_ref v2	YHRCDELTA16	LTR	complement(549312..549643)	/experiment="experimental evidence, no additional details recorded"; /note="YHRCDELTA16"; /db_xref="SGD:S000007002"	549312..549643	8	TRUE	80549312	80549643
chr9_ref v2	YILCTAU1	LTR	complement(196618..196988)	/experiment="experimental evidence, no additional details recorded"; /note="YILCTAU1"; /db_xref="SGD:S000007015"	196618..196988	9	TRUE	90196618	90196988
chr9_ref v2	YILCDELTA1	LTR	complement(197105..197453)	/experiment="experimental evidence, no additional details recorded"; /note="YILCDELTA1"; /db_xref="SGD:S000007011"	197105..197453	9	TRUE	90197105	90197453
chr9_ref v2	YILWSIGMA1	LTR	205185..205524	/experiment="experimental evidence, no additional details recorded"; /note="YILWSIGMA1"; /db_xref="SGD:S000007017"	205185..205524	9	FALSE	90205185	90205524
chr9_ref v2	YILWSIGMA2	LTR	210273..210612	/experiment="experimental evidence, no additional details recorded"; /note="YILWSIGMA2"; /db_xref="SGD:S000007018"	210273..210612	9	FALSE	90210273	90210612
chr9_ref v2	YILWDELTA2	LTR	246185..246517	/experiment="experimental evidence, no additional details recorded"; /note="YILWDELTA2"; /db_xref="SGD:S000007012"	246185..246517	9	FALSE	90246185	90246517
chr9_ref v2	YILCDELTA3	LTR	complement(300375..300693)	/experiment="experimental evidence, no additional details recorded"; /note="YILCDELTA3"; /db_xref="SGD:S000007013"	300375..300693	9	TRUE	90300375	90300693
chr9_ref v2	YILWSIGMA3	LTR	324357..324640	/experiment="experimental evidence, no additional details recorded"; /note="YILWSIGMA3"; /db_xref="SGD:S000007019"	324357..324640	9	FALSE	90324357	90324640
chr9_ref v2	YILWDELTA4	LTR	324644..324898	/experiment="experimental evidence, no additional details recorded"; /note="YILWDELTA4"; /db_xref="SGD:S000007016"	324644..324898	9	FALSE	90324644	90324898
chr9_ref v2	YILCDELTA5	LTR	complement(335901..336090)	/experiment="experimental evidence, no additional details recorded"; /note="YILCDELTA5"; /db_xref="SGD:S000007014"	335901..336090	9	TRUE	90335901	90336090
chr9_ref v2	YIRCDELTA6	LTR	complement(425394..425618)	/experiment="experimental evidence, no additional details recorded"; /note="YIRCDELTA6"; /db_xref="SGD:S000007021"	425394..425618	9	TRUE	90425394	90425618
chr10_ref v2	YJLWDELTA1	LTR	59506..59785	/experiment="experimental evidence, no additional details recorded"; /note="YJLWDELTA1"; /db_xref="SGD:S000007027"	59506..59785	10	FALSE	100059506	100059785
chr10_ref v2	YJLWSIGMA1	LTR	197395..197488	/experiment="experimental evidence, no additional details recorded"; /note="YJLWSIGMA1"; /db_xref="SGD:S000007035"	197395..197488	10	FALSE	100197395	100197488
chr10_ref v2	YJLWTAU1	LTR	197539..197909	/experiment="experimental evidence, no additional details recorded"; /note="YJLWTAU1"; /db_xref="SGD:S000007036"	197539..197909	10	FALSE	100197539	100197909
chr10_ref v2	YJLWTAU2	LTR	203206..203576	/experiment="experimental evidence, no additional details recorded"; /note="YJLWTAU2"; /db_xref="SGD:S000007037"	203206..203576	10	FALSE	100203206	100203576
chr10_ref v2	YJLCDELTA3	LTR	complement(203584..203915)	/experiment="experimental evidence, no additional details recorded"; /note="YJLCDELTA3"; /db_xref="SGD:S000007022"	203584..203915	10	TRUE	100203584	100203915
chr10_ref v2	YJLCDELTA4	LTR	complement(354317..354983)	/experiment="experimental evidence, no additional details recorded"; /note="YJLCDELTA4"; /db_xref="SGD:S000007023"	354317..354983	10	TRUE	100354317	100354983
chr10_ref v2	YJLCDELTA5	LTR	complement(354623..354954)	/experiment="experimental evidence, no additional details recorded"; /note="YJLCDELTA5"; /db_xref="SGD:S000007024"	354623..354954	10	TRUE	100354623	100354954
chr10_ref v2	YJLCDELTA6	LTR	complement(374497..374588)	/experiment="experimental evidence, no additional details recorded"; /note="YJLCDELTA6"; /db_xref="SGD:S000007025"	374497..374588	10	TRUE	100374497	100374588
chr10_ref v2	YJLCDELTA7	LTR	complement(377251..377523)	/experiment="experimental evidence, no additional details recorded"; /note="YJLCDELTA7"; /db_xref="SGD:S000007026"	377251..377523	10	TRUE	100377251	100377523
chr10_ref v2	YJRWTAU3	LTR	415919..416094	/experiment="experimental evidence, no additional details recorded"; /note="YJRWTAU3"; /db_xref="SGD:S000007047"	415919..416094	10	FALSE	100415919	100416094
chr10_ref v2	YJLWDELTA8	LTR	416159..416303	/experiment="experimental evidence, no additional details recorded"; /note="YJLWDELTA8"; /db_xref="SGD:S000007029"	416159..416303	10	FALSE	100416159	100416303
chr10_ref v2	YJLWDELTA9	LTR	416552..416679	/experiment="experimental evidence, no additional details recorded"; /note="YJLWDELTA9"; /db_xref="SGD:S000007030"	416552..416679	10	FALSE	100416552	100416679
chr10_ref v2	YJLWTAU4	LTR	421599..421948	/experiment="experimental evidence, no additional details recorded"; /note="YJLWTAU4"; /db_xref="SGD:S000007038"	421599..421948	10	FALSE	100421599	100421948
chr10_ref v2	YJLWDELTA10	LTR	422254..422540	/experiment="experimental evidence, no additional details recorded"; /note="YJLWDELTA10"; /db_xref="SGD:S000007031"	422254..422540	10	FALSE	100422254	100422540
chr10_ref v2	YJRWDELTA11	LTR	472116..472453	/experiment="experimental evidence, no additional details recorded"; /note="YJRWDELTA11"; /db_xref="SGD:S000007040"	472116..472453	10	FALSE	100472116	100472453
chr10_ref v2	YJRWDELTA12	LTR	477704..478037	/experiment="experimental evidence, no additional details recorded"; /note="YJRWDELTA12"; /db_xref="SGD:S000007041"	477704..478037	10	FALSE	100477704	100478037
chr10_ref v2	YJRWDELTA13	LTR	483288..483625	/experiment="experimental evidence, no additional details recorded"; /note="YJRWDELTA13"; /db_xref="SGD:S000007042"	483288..483625	10	FALSE	100483288	100483625
chr10_ref v2	YJRWDELTA14	LTR	517613..517754	/experiment="experimental evidence, no additional details recorded"; /note="YJRWDELTA14"; /db_xref="SGD:S000007043"	517613..517754	10	FALSE	100517613	100517754
chr10_ref v2	YJRCDELTA15	LTR	complement(531168..531327)	/experiment="experimental evidence, no additional details recorded"; /note="YJRCDELTA15"; /db_xref="SGD:S000007032"	531168..531327	10	TRUE	100531168	100531327
chr10_ref v2	YJRCDELTA16	LTR	complement(537394..537697)	/experiment="experimental evidence, no additional details recorded"; /note="YJRCDELTA16"; /db_xref="SGD:S000007033"	537394..537697	10	TRUE	100537394	100537697
chr10_ref v2	YJRWDELTA17	LTR	537759..538090	/experiment="experimental evidence, no additional details recorded"; /note="YJRWDELTA17"; /db_xref="SGD:S000007044"	537759..538090	10	FALSE	100537759	100538090
chr10_ref v2	YJRWDELTA18	LTR	540397..540718	/experiment="experimental evidence, no additional details recorded"; /note="YJRWDELTA18"; /db_xref="SGD:S000007045"	540397..540718	10	FALSE	100540397	100540718
chr10_ref v2	YJRCDELTA19	LTR	complement(540726..541058)	/experiment="experimental evidence, no additional details recorded"; /note="YJRCDELTA19"; /db_xref="SGD:S000007034"	540726..541058	10	TRUE	100540726	100541058
chr10_ref v2	YJRWDELTA20	LTR	543080..543372	/experiment="experimental evidence, no additional details recorded"; /note="YJRWDELTA20"; /db_xref="SGD:S000007046"	543080..543372	10	FALSE	100543080	100543372
chr11_ref v2	YKLWDELTA1	LTR	74238..74520	/experiment="experimental evidence, no additional details recorded"; /note="YKLWDELTA1"; /db_xref="SGD:S000007055"	74238..74520	11	FALSE	110074238	110074520
chr11_ref v2	YKLCDELTA2	LTR	complement(83811..84120)	/experiment="experimental evidence, no additional details recorded"; /note="YKLCDELTA2"; /db_xref="SGD:S000007050"	83811..84120	11	TRUE	110083811	110084120
chr11_ref v2	YKLWDELTA3	LTR	162835..163173	/experiment="experimental evidence, no additional details recorded"; /note="YKLWDELTA3"; /db_xref="SGD:S000007056"	162835..163173	11	FALSE	110162835	110163173
chr11_ref v2	YKLCSIGMA1	LTR	complement(202298..202637)	/experiment="experimental evidence, no additional details recorded"; /note="YKLCSIGMA1"; /db_xref="SGD:S000007054"	202298..202637	11	TRUE	110202298	110202637
chr11_ref v2	YKLCDELTA4	LTR	complement(219049..219377)	/experiment="experimental evidence, no additional details recorded"; /note="YKLCDELTA4"; /db_xref="SGD:S000007051"	219049..219377	11	TRUE	110219049	110219377
chr11_ref v2	YKLCDELTA5	LTR	complement(301988..302279)	/experiment="experimental evidence, no additional details recorded"; /note="YKLCDELTA5"; /db_xref="SGD:S000007052"	301988..302279	11	TRUE	110301988	110302279
chr11_ref v2	YKLCDELTA6	LTR	complement(313256..313573)	/experiment="experimental evidence, no additional details recorded"; /note="YKLCDELTA6"; /db_xref="SGD:S000007053"	313256..313573	11	TRUE	110313256	110313573
chr11_ref v2	YKLWDELTA7	LTR	313847..314178	/experiment="experimental evidence, no additional details recorded"; /note="YKLWDELTA7"; /db_xref="SGD:S000007057"	313847..314178	11	FALSE	110313847	110314178
chr11_ref v2	YKRCDELTA8	LTR	complement(457794..458125)	/experiment="experimental evidence, no additional details recorded"; /note="YKRCDELTA8"; /db_xref="SGD:S000007058"	457794..458125	11	TRUE	110457794	110458125
chr11_ref v2	YKRCDELTA9	LTR	complement(489940..490070)	/experiment="experimental evidence, no additional details recorded"; /note="YKRCDELTA9"; /db_xref="SGD:S000007059"	489940..490070	11	TRUE	110489940	110490070
chr11_ref v2	YKRWDELTA10	LTR	490118..490441	/experiment="experimental evidence, no additional details recorded"; /note="YKRWDELTA10"; /db_xref="SGD:S000007062"	490118..490441	11	FALSE	110490118	110490441
chr11_ref v2	YKRCDELTA11	LTR	complement(513188..513502)	/experiment="experimental evidence, no additional details recorded"; /note="YKRCDELTA11"; /db_xref="SGD:S000007060"	513188..513502	11	TRUE	110513188	110513502
chr11_ref v2	YKRCDELTA12	LTR	complement(517109..517440)	/experiment="experimental evidence, no additional details recorded"; /note="YKRCDELTA12"; /db_xref="SGD:S000007061"	517109..517440	11	TRUE	110517109	110517440
chr11_ref v2	YKRWOMEGA1	LTR	665062..665300	/experiment="experimental evidence, no additional details recorded"; /note="YKRWOMEGA1"; /db_xref="SGD:S000007063"	665062..665300	11	FALSE	110665062	110665300
chr12_ref v2	YLLCDELTA1	LTR	complement(92050..92381)	/experiment="experimental evidence, no additional details recorded"; /note="YLLCDELTA1"; /db_xref="SGD:S000007064"	92050..92381	12	TRUE	120092050	120092381
chr12_ref v2	YLRCSIGMA1	LTR	complement(167963..168300)	/experiment="experimental evidence, no additional details recorded"; /note="YLRCSIGMA1"; /db_xref="SGD:S000007079"	167963..168300	12	TRUE	120167963	120168300
chr12_ref v2	YLRCDELTA2	LTR	complement(214996..215333)	/experiment="experimental evidence, no additional details recorded"; /note="YLRCDELTA2"; /db_xref="SGD:S000007065"	214996..215333	12	TRUE	120214996	120215333
chr12_ref v2	YLRCDELTA3	LTR	complement(220584..220921)	/experiment="experimental evidence, no additional details recorded"; /note="YLRCDELTA3"; /db_xref="SGD:S000007066"	220584..220921	12	TRUE	120220584	120220921
chr12_ref v2	YLRWDELTA4	LTR	220922..221182	/experiment="experimental evidence, no additional details recorded"; /note="YLRWDELTA4"; /db_xref="SGD:S000007083"	220922..221182	12	FALSE	120220922	120221182
chr12_ref v2	YLRCDELTA5	LTR	complement(365719..366053)	/experiment="experimental evidence, no additional details recorded"; /note="YLRCDELTA5"; /db_xref="SGD:S000007067"	365719..366053	12	TRUE	120365719	120366053
chr12_ref v2	YLRWSIGMA2	LTR	373908..374247	/experiment="experimental evidence, no additional details recorded"; /note="YLRWSIGMA2"; /db_xref="SGD:S000007095"	373908..374247	12	FALSE	120373908	120374247
chr12_ref v2	YLRWDELTA6	LTR	448751..448937	/experiment="experimental evidence, no additional details recorded"; /note="YLRWDELTA6"; /db_xref="SGD:S000007084"	448751..448937	12	FALSE	120448751	120448937
chr12_ref v2	YLRCDELTA7	LTR	complement(475885..476219)	/experiment="experimental evidence, no additional details recorded"; /note="YLRCDELTA7"; /db_xref="SGD:S000007068"	475885..476219	12	TRUE	120475885	120476219
chr12_ref v2	YLRCDELTA8	LTR	complement(481472..481806)	/experiment="experimental evidence, no additional details recorded"; /note="YLRCDELTA8"; /db_xref="SGD:S000007069"	481472..481806	12	TRUE	120481472	120481806
chr12_ref v2	YLRCDELTA9	LTR	complement(592615..592944)	/experiment="experimental evidence, no additional details recorded"; /note="YLRCDELTA9"; /db_xref="SGD:S000007070"	592615..592944	12	TRUE	120592615	120592944
chr12_ref v2	YLRWDELTA10	LTR	593054..593387	/experiment="experimental evidence, no additional details recorded"; /note="YLRWDELTA10"; /db_xref="SGD:S000007085"	593054..593387	12	FALSE	120593054	120593387
chr12_ref v2	YLRWDELTA11	LTR	598638..598971	/experiment="experimental evidence, no additional details recorded"; /note="YLRWDELTA11"; /db_xref="SGD:S000007086"	598638..598971	12	FALSE	120598638	120598971
chr12_ref v2	YLRWDELTA12	LTR	599177..599453	/experiment="experimental evidence, no additional details recorded"; /note="YLRWDELTA12"; /db_xref="SGD:S000007087"	599177..599453	12	FALSE	120599177	120599453
chr12_ref v2	YLRCTAU1	LTR	complement(599479..599753)	/experiment="experimental evidence, no additional details recorded"; /note="YLRCTAU1"; /db_xref="SGD:S000007080"	599479..599753	12	TRUE	120599479	120599753
chr12_ref v2	YLRWDELTA13	LTR	650733..651066	/experiment="experimental evidence, no additional details recorded"; /note="YLRWDELTA13"; /db_xref="SGD:S000007088"	650733..651066	12	FALSE	120650733	120651066
chr12_ref v2	YLRWDELTA14	LTR	656319..656652	/experiment="experimental evidence, no additional details recorded"; /note="YLRWDELTA14"; /db_xref="SGD:S000007089"	656319..656652	12	FALSE	120656319	120656652
chr12_ref v2	YLRWSIGMA3	LTR	656931..657274	/experiment="experimental evidence, no additional details recorded"; /note="YLRWSIGMA3"; /db_xref="SGD:S000007096"	656931..657274	12	FALSE	120656931	120657274
chr12_ref v2	YLRWDELTA15	LTR	657358..657676	/experiment="experimental evidence, no additional details recorded"; /note="YLRWDELTA15"; /db_xref="SGD:S000007090"	657358..657676	12	FALSE	120657358	120657676
chr12_ref v2	YLRCDELTA16	LTR	complement(688028..688277)	/experiment="experimental evidence, no additional details recorded"; /note="YLRCDELTA16"; /db_xref="SGD:S000007071"	688028..688277	12	TRUE	120688028	120688277
chr12_ref v2	YLRWDELTA17	LTR	688278..688573	/experiment="experimental evidence, no additional details recorded"; /note="YLRWDELTA17"; /db_xref="SGD:S000007091"	688278..688573	12	FALSE	120688278	120688573
chr12_ref v2	YLRCDELTA18	LTR	complement(731578..731910)	/experiment="experimental evidence, no additional details recorded"; /note="YLRCDELTA18"; /db_xref="SGD:S000007072"	731578..731910	12	TRUE	120731578	120731910
chr12_ref v2	YLRCDELTA19	LTR	complement(734411..734581)	/experiment="experimental evidence, no additional details recorded"; /note="YLRCDELTA19"; /db_xref="SGD:S000007073"	734411..734581	12	TRUE	120734411	120734581
chr12_ref v2	YLRWSIGMA4	LTR	793463..793781	/experiment="experimental evidence, no additional details recorded"; /note="YLRWSIGMA4"; /db_xref="SGD:S000007097"	793463..793781	12	FALSE	120793463	120793781
chr12_ref v2	YLRWDELTA20	LTR	796810..796999	/experiment="experimental evidence, no additional details recorded"; /note="YLRWDELTA20"; /db_xref="SGD:S000007092"	796810..796999	12	FALSE	120796810	120796999
chr12_ref v2	YLRCDELTA21	LTR	complement(817984..818314)	/experiment="experimental evidence, no additional details recorded"; /note="YLRCDELTA21"; /db_xref="SGD:S000007074"	817984..818314	12	TRUE	120817984	120818314
chr12_ref v2	YLRWDELTA22	LTR	941103..941434	/experiment="experimental evidence, no additional details recorded"; /note="YLRWDELTA22"; /db_xref="SGD:S000007093"	941103..941434	12	FALSE	120941103	120941434
chr12_ref v2	YLRWDELTA23	LTR	946730..947061	/experiment="experimental evidence, no additional details recorded"; /note="YLRWDELTA23"; /db_xref="SGD:S000007094"	946730..947061	12	FALSE	120946730	120947061
chr12_ref v2	YLRWDELTA24	LTR	963141..963456	/experiment="experimental evidence, no additional details recorded"; /note="YLRWDELTA24"; /db_xref="SGD:S000007075"	963141..963456	12	FALSE	120963141	120963456
chr12_ref v2	YLRCDELTA25	LTR	complement(976169..976500)	/experiment="experimental evidence, no additional details recorded"; /note="YLRCDELTA25"; /db_xref="SGD:S000007076"	976169..976500	12	TRUE	120976169	120976500
chr12_ref v2	YLRCDELTA26	LTR	complement(981280..981611)	/experiment="experimental evidence, no additional details recorded"; /note="YLRCDELTA26"; /db_xref="SGD:S000007077"	981280..981611	12	TRUE	120981280	120981611
chr12_ref v2	YLRCDELTA27	LTR	complement(1052215..1052544)	/experiment="experimental evidence, no additional details recorded"; /note="YLRCDELTA27"; /db_xref="SGD:S000007078"	1052215..1052544	12	TRUE	121052215	121052544
chr13_ref v2	YMLCDELTA1	LTR	complement(131993..132325)	/experiment="experimental evidence, no additional details recorded"; /note="YMLCDELTA1"; /db_xref="SGD:S000007101"	131993..132325	13	TRUE	130131993	130132325
chr13_ref v2	YMLCDELTA2	LTR	complement(168351..168675)	/experiment="experimental evidence, no additional details recorded"; /note="YMLCDELTA2"; /db_xref="SGD:S000007102"	168351..168675	13	TRUE	130168351	130168675
chr13_ref v2	YMLWDELTA3	LTR	184166..184497	/experiment="experimental evidence, no additional details recorded"; /note="YMLWDELTA3"; /db_xref="SGD:S000007103"	184166..184497	13	FALSE	130184166	130184497
chr13_ref v2	YMLWDELTA4	LTR	189748..190079	/experiment="experimental evidence, no additional details recorded"; /note="YMLWDELTA4"; /db_xref="SGD:S000007104"	189748..190079	13	FALSE	130189748	130190079
chr13_ref v2	YMLWDELTA5	LTR	196328..196664	/experiment="experimental evidence, no additional details recorded"; /note="YMLWDELTA5"; /db_xref="SGD:S000007105"	196328..196664	13	FALSE	130196328	130196664
chr13_ref v2	YMLWDELTA6	LTR	201915..202230	/experiment="experimental evidence, no additional details recorded"; /note="YMLWDELTA6"; /db_xref="SGD:S000007106"	201915..202230	13	FALSE	130201915	130202230
chr13_ref v2	YMRCTAU1	LTR	complement(290043..290218)	/experiment="experimental evidence, no additional details recorded"; /note="YMRCTAU1"; /db_xref="SGD:S000007117"	290043..290218	13	TRUE	130290043	130290218
chr13_ref v2	YMRCDELTA7	LTR	complement(356999..357330)	/experiment="experimental evidence, no additional details recorded"; /note="YMRCDELTA7"; /db_xref="SGD:S000007109"	356999..357330	13	TRUE	130356999	130357330
chr13_ref v2	YMRCDELTA8	LTR	complement(362581..362912)	/experiment="experimental evidence, no additional details recorded"; /note="YMRCDELTA8"; /db_xref="SGD:S000007110"	362581..362912	13	TRUE	130362581	130362912
chr13_ref v2	YMRCDELTA9	LTR	complement(372691..373028)	/experiment="experimental evidence, no additional details recorded"; /note="YMRCDELTA9"; /db_xref="SGD:S000007111"	372691..373028	13	TRUE	130372691	130373028
chr13_ref v2	YMRCDELTA10	LTR	complement(378279..378616)	/experiment="experimental evidence, no additional details recorded"; /note="YMRCDELTA10"; /db_xref="SGD:S000007112"	378279..378616	13	TRUE	130378279	130378616
chr13_ref v2	YMRCDELTA11	LTR	complement(378721..379055)	/experiment="experimental evidence, no additional details recorded"; /note="YMRCDELTA11"; /db_xref="SGD:S000007113"	378721..379055	13	TRUE	130378721	130379055
chr13_ref v2	YMRWDELTA12	LTR	379066..379192	/experiment="experimental evidence, no additional details recorded"; /note="YMRWDELTA12"; /db_xref="SGD:S000007121"	379066..379192	13	FALSE	130379066	130379192
chr13_ref v2	YMRCDELTA13	LTR	complement(463122..463455)	/experiment="experimental evidence, no additional details recorded"; /note="YMRCDELTA13"; /db_xref="SGD:S000007114"	463122..463455	13	TRUE	130463122	130463455
chr13_ref v2	YMRCDELTA14	LTR	complement(481208..481541)	/experiment="experimental evidence, no additional details recorded"; /note="YMRCDELTA14"; /db_xref="SGD:S000007115"	481208..481541	13	TRUE	130481208	130481541
chr13_ref v2	YMRWDELTA15	LTR	481565..481802	/experiment="experimental evidence, no additional details recorded"; /note="YMRWDELTA15"; /db_xref="SGD:S000007122"	481565..481802	13	FALSE	130481565	130481802
chr13_ref v2	YMRWDELTA16	LTR	503186..503383	/experiment="experimental evidence, no additional details recorded"; /note="YMRWDELTA16"; /db_xref="SGD:S000007123"	503186..503383	13	FALSE	130503186	130503383
chr13_ref v2	YMRWTAU2	LTR	503765..504135	/experiment="experimental evidence, no additional details recorded"; /note="YMRWTAU2"; /db_xref="SGD:S000007128"	503765..504135	13	FALSE	130503765	130504135
chr13_ref v2	YMRWDELTA17	LTR	504340..504671	/experiment="experimental evidence, no additional details recorded"; /note="YMRWDELTA17"; /db_xref="SGD:S000007124"	504340..504671	13	FALSE	130504340	130504671
chr13_ref v2	YMRCDELTA18	LTR	complement(573106..573332)	/experiment="experimental evidence, no additional details recorded"; /note="YMRCDELTA18"; /db_xref="SGD:S000007116"	573106..573332	13	TRUE	130573106	130573332
chr13_ref v2	YMRWDELTA19	LTR	768532..768863	/experiment="experimental evidence, no additional details recorded"; /note="YMRWDELTA19"; /db_xref="SGD:S000007125"	768532..768863	13	FALSE	130768532	130768863
chr13_ref v2	YMRCTAU3	LTR	complement(808519..808888)	/experiment="experimental evidence, no additional details recorded"; /note="YMRCTAU3"; /db_xref="SGD:S000007118"	808519..808888	13	TRUE	130808519	130808888
chr13_ref v2	YMRWDELTA20	LTR	808982..809215	/experiment="experimental evidence, no additional details recorded"; /note="YMRWDELTA20"; /db_xref="SGD:S000007126"	808982..809215	13	FALSE	130808982	130809215
chr13_ref v2	YMRWDELTA21	LTR	837432..837746	/experiment="experimental evidence, no additional details recorded"; /note="YMRWDELTA21"; /db_xref="SGD:S000007127"	837432..837746	13	FALSE	130837432	130837746
chr14_ref v2	YNLWTAU1	LTR	96455..96613	/experiment="experimental evidence, no additional details recorded"; /note="YNLWTAU1"; /db_xref="SGD:S000007140"	96455..96613	14	FALSE	140096455	140096613
chr14_ref v2	YNLCDELTA1	LTR	complement(96614..96945)	/experiment="experimental evidence, no additional details recorded"; /note="YNLCDELTA1"; /db_xref="SGD:S000007129"	96614..96945	14	TRUE	140096614	140096945
chr14_ref v2	YNLCDELTA2	LTR	complement(102150..102481)	/experiment="experimental evidence, no additional details recorded"; /note="YNLCDELTA2"; /db_xref="SGD:S000007130"	102150..102481	14	TRUE	140102150	140102481
chr14_ref v2	YNLCSIGMA1	LTR	complement(102591..102659)	/experiment="experimental evidence, no additional details recorded"; /note="YNLCSIGMA1"; /db_xref="SGD:S000007133"	102591..102659	14	TRUE	140102591	140102659
chr14_ref v2	YNLWDELTA3	LTR	519119..519452	/experiment="experimental evidence, no additional details recorded"; /note="YNLWDELTA3"; /db_xref="SGD:S000007136"	519119..519452	14	FALSE	140519119	140519452
chr14_ref v2	YNLWDELTA4	LTR	524685..525018	/experiment="experimental evidence, no additional details recorded"; /note="YNLWDELTA4"; /db_xref="SGD:S000007137"	524685..525018	14	FALSE	140524685	140525018
chr14_ref v2	YNLWSIGMA2	LTR	546379..546670	/experiment="experimental evidence, no additional details recorded"; /note="YNLWSIGMA2"; /db_xref="SGD:S000007138"	546379..546670	14	FALSE	140546379	140546670
chr14_ref v2	YNLWSIGMA3	LTR	546694..547033	/experiment="experimental evidence, no additional details recorded"; /note="YNLWSIGMA3"; /db_xref="SGD:S000007139"	546694..547033	14	FALSE	140546694	140547033
chr14_ref v2	YNLWTAU2	LTR	561563..561933	/experiment="experimental evidence, no additional details recorded"; /note="YNLWTAU2"; /db_xref="SGD:S000007141"	561563..561933	14	FALSE	140561563	140561933
chr14_ref v2	YNLCDELTA5	LTR	complement(561989..562320)	/experiment="experimental evidence, no additional details recorded"; /note="YNLCDELTA5"; /db_xref="SGD:S000007131"	561989..562320	14	TRUE	140561989	140562320
chr14_ref v2	YNLCDELTA6	LTR	complement(567616..567948)	/experiment="experimental evidence, no additional details recorded"; /note="YNLCDELTA6"; /db_xref="SGD:S000007132"	567616..567948	14	TRUE	140567616	140567948
chr14_ref v2	YNRCDELTA7	LTR	complement(631954..632070)	/experiment="experimental evidence, no additional details recorded"; /note="YNRCDELTA7"; /db_xref="SGD:S000007143"	631954..632070	14	TRUE	140631954	140632070
chr14_ref v2	YNRCTAU3	LTR	complement(632075..632445)	/experiment="experimental evidence, no additional details recorded"; /note="YNRCTAU3"; /db_xref="SGD:S000007146"	632075..632445	14	TRUE	140632075	140632445
chr14_ref v2	YNRWSIGMA4	LTR	726190..726530	/experiment="experimental evidence, no additional details recorded"; /note="YNRWSIGMA4"; /db_xref="SGD:S000007147"	726190..726530	14	FALSE	140726190	140726530
chr14_ref v2	YNRCDELTA8	LTR	complement(726570..726901)	/experiment="experimental evidence, no additional details recorded"; /note="YNRCDELTA8"; /db_xref="SGD:S000007144"	726570..726901	14	TRUE	140726570	140726901
chr14_ref v2	YNRCDELTA9	LTR	complement(727319..727617)	/experiment="experimental evidence, no additional details recorded"; /note="YNRCDELTA9"; /db_xref="SGD:S000007145"	727319..727617	14	TRUE	140727319	140727617
chr15_ref v2	YOLCDELTA1	LTR	complement(2894..3223)	/experiment="experimental evidence, no additional details recorded"; /note="YOLCDELTA1"; /db_xref="SGD:S000007148"	2894..3223	15	TRUE	150002894	150003223
chr15_ref v2	YOLWTAU1	LTR	3809..3986	/experiment="experimental evidence, no additional details recorded"; /note="YOLWTAU1"; /db_xref="SGD:S000007160"	3809..3986	15	FALSE	150003809	150003986
chr15_ref v2	YOLCDELTA2	LTR	complement(18302..18561)	/experiment="experimental evidence, no additional details recorded"; /note="YOLCDELTA2"; /db_xref="SGD:S000007149"	18302..18561	15	TRUE	150018302	150018561
chr15_ref v2	YOLCDELTA3	LTR	complement(113294..113626)	/experiment="experimental evidence, no additional details recorded"; /note="YOLCDELTA3"; /db_xref="SGD:S000007150"	113294..113626	15	TRUE	150113294	150113626
chr15_ref v2	YOLWDELTA4	LTR	117703..118040	/experiment="experimental evidence, no additional details recorded"; /note="YOLWDELTA4"; /db_xref="SGD:S000007154"	117703..118040	15	FALSE	150117703	150118040
chr15_ref v2	YOLWDELTA5	LTR	123291..123628	/experiment="experimental evidence, no additional details recorded"; /note="YOLWDELTA5"; /db_xref="SGD:S000007155"	123291..123628	15	FALSE	150123291	150123628
chr15_ref v2	YOLWSIGMA1	LTR	224744..225085	/experiment="experimental evidence, no additional details recorded"; /note="YOLWSIGMA1"; /db_xref="SGD:S000007158"	224744..225085	15	FALSE	150224744	150225085
chr15_ref v2	YOLWDELTA6	LTR	225144..225341	/experiment="experimental evidence, no additional details recorded"; /note="YOLWDELTA6"; /db_xref="SGD:S000007156"	225144..225341	15	FALSE	150225144	150225341
chr15_ref v2	YOLCDELTA7	LTR	complement(225899..226226)	/experiment="experimental evidence, no additional details recorded"; /note="YOLCDELTA7"; /db_xref="SGD:S000007151"	225899..226226	15	TRUE	150225899	150226226
chr15_ref v2	YOLCDELTA8	LTR	complement(298725..299063)	/experiment="experimental evidence, no additional details recorded"; /note="YOLCDELTA8"; /db_xref="SGD:S000007152"	298725..299063	15	TRUE	150298725	150299063
chr15_ref v2	YOLCDELTA9	LTR	complement(338640..338940)	/experiment="experimental evidence, no additional details recorded"; /note="YOLCDELTA9"; /db_xref="SGD:S000007153"	338640..338940	15	TRUE	150338640	150338940
chr15_ref v2	YOLWSIGMA2	LTR	352170..352508	/experiment="experimental evidence, no additional details recorded"; /note="YOLWSIGMA2"; /db_xref="SGD:S000007159"	352170..352508	15	FALSE	150352170	150352508
chr15_ref v2	YOLWDELTA10	LTR	352723..353000	/experiment="experimental evidence, no additional details recorded"; /note="YOLWDELTA10"; /db_xref="SGD:S000007157"	352723..353000	15	FALSE	150352723	150353000
chr15_ref v2	YORCDELTA11	LTR	complement(436217..436525)	/experiment="experimental evidence, no additional details recorded"; /note="YORCDELTA11"; /db_xref="SGD:S000007162"	436217..436525	15	TRUE	150436217	150436525
chr15_ref v2	YORWDELTA12	LTR	592554..592861	/experiment="experimental evidence, no additional details recorded"; /note="YORWDELTA12"; /db_xref="SGD:S000007169"	592554..592861	15	FALSE	150592554	150592861
chr15_ref v2	YORWDELTA13	LTR	592862..593193	/experiment="experimental evidence, no additional details recorded"; /note="YORWDELTA13"; /db_xref="SGD:S000007170"	592862..593193	15	FALSE	150592862	150593193
chr15_ref v2	YORWDELTA14	LTR	598444..598775	/experiment="experimental evidence, no additional details recorded"; /note="YORWDELTA14"; /db_xref="SGD:S000007171"	598444..598775	15	FALSE	150598444	150598775
chr15_ref v2	YORCDELTA15	LTR	complement(662045..662366)	/experiment="experimental evidence, no additional details recorded"; /note="YORCDELTA15"; /db_xref="SGD:S000007163"	662045..662366	15	TRUE	150662045	150662366
chr15_ref v2	YORWDELTA16	LTR	662367..662511	/experiment="experimental evidence, no additional details recorded"; /note="YORWDELTA16"; /db_xref="SGD:S000007172"	662367..662511	15	FALSE	150662367	150662511
chr15_ref v2	YORWDELTA17	LTR	662855..663187	/experiment="experimental evidence, no additional details recorded"; /note="YORWDELTA17"; /db_xref="SGD:S000007173"	662855..663187	15	FALSE	150662855	150663187
chr15_ref v2	YORCDELTA18	LTR	complement(701471..701624)	/experiment="experimental evidence, no additional details recorded"; /note="YORCDELTA18"; /db_xref="SGD:S000007164"	701471..701624	15	TRUE	150701471	150701624
chr15_ref v2	YORWDELTA19	LTR	701654..701804	/experiment="experimental evidence, no additional details recorded"; /note="YORWDELTA19"; /db_xref="SGD:S000007174"	701654..701804	15	FALSE	150701654	150701804
chr15_ref v2	YORWTAU2	LTR	701814..702104	/experiment="experimental evidence, no additional details recorded"; /note="YORWTAU2"; /db_xref="SGD:S000007180"	701814..702104	15	FALSE	150701814	150702104
chr15_ref v2	YORCDELTA20	LTR	complement(702105..702437)	/experiment="experimental evidence, no additional details recorded"; /note="YORCDELTA20"; /db_xref="SGD:S000007165"	702105..702437	15	TRUE	150702105	150702437
chr15_ref v2	YORCDELTA21	LTR	complement(707733..708065)	/experiment="experimental evidence, no additional details recorded"; /note="YORCDELTA21"; /db_xref="SGD:S000007166"	707733..708065	15	TRUE	150707733	150708065
chr15_ref v2	YORWTAU3	LTR	708066..708149	/experiment="experimental evidence, no additional details recorded"; /note="YORWTAU3"; /db_xref="SGD:S000007181"	708066..708149	15	FALSE	150708066	150708149
chr15_ref v2	YORWSIGMA3	LTR	852316..852655	/experiment="experimental evidence, no additional details recorded"; /note="YORWSIGMA3"; /db_xref="SGD:S000007178"	852316..852655	15	FALSE	150852316	150852655
chr15_ref v2	YORWSIGMA4	LTR	967032..967342	/experiment="experimental evidence, no additional details recorded"; /note="YORWSIGMA4"; /db_xref="SGD:S000007179"	967032..967342	15	FALSE	150967032	150967342
chr15_ref v2	YORWDELTA22	LTR	967334..967472	/experiment="experimental evidence, no additional details recorded"; /note="YORWDELTA22"; /db_xref="SGD:S000007175"	967334..967472	15	FALSE	150967334	150967472
chr15_ref v2	YORWDELTA23	LTR	968327..968658	/experiment="experimental evidence, no additional details recorded"; /note="YORWDELTA23"; /db_xref="SGD:S000007176"	968327..968658	15	FALSE	150968327	150968658
chr15_ref v2	YORWDELTA24	LTR	973954..974285	/experiment="experimental evidence, no additional details recorded"; /note="YORWDELTA24"; /db_xref="SGD:S000007177"	973954..974285	15	FALSE	150973954	150974285
chr15_ref v2	YORCDELTA25	LTR	complement(978300..978631)	/experiment="experimental evidence, no additional details recorded"; /note="YORCDELTA25"; /db_xref="SGD:S000007167"	978300..978631	15	TRUE	150978300	150978631
chr16_ref v2	YPLCDELTA1	LTR	complement(55657..55858)	/experiment="experimental evidence, no additional details recorded"; /note="YPLCDELTA1"; /db_xref="SGD:S000007184"	55657..55858	16	TRUE	160055657	160055858
chr16_ref v2	YPLWSIGMA1	LTR	56290..56358	/experiment="experimental evidence, no additional details recorded"; /note="YPLWSIGMA1"; /db_xref="SGD:S000007198"	56290..56358	16	FALSE	160056290	160056358
chr16_ref v2	YPLWDELTA2	LTR	56409..56451	/experiment="experimental evidence, no additional details recorded"; /note="YPLWDELTA2"; /db_xref="SGD:S000007189"	56409..56451	16	FALSE	160056409	160056451
chr16_ref v2	YPLWDELTA3	LTR	56452..56788	/experiment="experimental evidence, no additional details recorded"; /note="YPLWDELTA3"; /db_xref="SGD:S000007190"	56452..56788	16	FALSE	160056452	160056788
chr16_ref v2	YPLWDELTA4	LTR	62039..62375	/experiment="experimental evidence, no additional details recorded"; /note="YPLWDELTA4"; /db_xref="SGD:S000007191"	62039..62375	16	FALSE	160062039	160062375
chr16_ref v2	YPLWDELTA5	LTR	62389..62720	/experiment="experimental evidence, no additional details recorded"; /note="YPLWDELTA5"; /db_xref="SGD:S000007192"	62389..62720	16	FALSE	160062389	160062720
chr16_ref v2	YPLWDELTA6	LTR	62724..63006	/experiment="experimental evidence, no additional details recorded"; /note="YPLWDELTA6"; /db_xref="SGD:S000007193"	62724..63006	16	FALSE	160062724	160063006
chr16_ref v2	YPLWDELTA7	LTR	210442..210762	/experiment="experimental evidence, no additional details recorded"; /note="YPLWDELTA7"; /db_xref="SGD:S000007194"	210442..210762	16	FALSE	160210442	160210762
chr16_ref v2	YPLWDELTA8	LTR	211568..211889	/experiment="experimental evidence, no additional details recorded"; /note="YPLWDELTA8"; /db_xref="SGD:S000007195"	211568..211889	16	FALSE	160211568	160211889
chr16_ref v2	YPLWDELTA9	LTR	436059..436240	/experiment="experimental evidence, no additional details recorded"; /note="YPLWDELTA9"; /db_xref="SGD:S000007196"	436059..436240	16	FALSE	160436059	160436240
chr16_ref v2	YPLCDELTA10	LTR	complement(436241..436578)	/experiment="experimental evidence, no additional details recorded"; /note="YPLCDELTA10"; /db_xref="SGD:S000007185"	436241..436578	16	TRUE	160436241	160436578
chr16_ref v2	YPLWDELTA11	LTR	436585..436722	/experiment="experimental evidence, no additional details recorded"; /note="YPLWDELTA11"; /db_xref="SGD:S000007197"	436585..436722	16	FALSE	160436585	160436722
chr16_ref v2	YPLCTAU1	LTR	complement(436881..437251)	/experiment="experimental evidence, no additional details recorded"; /note="YPLCTAU1"; /db_xref="SGD:S000007186"	436881..437251	16	TRUE	160436881	160437251
chr16_ref v2	YPLCTAU2	LTR	complement(442733..443103)	/experiment="experimental evidence, no additional details recorded"; /note="YPLCTAU2"; /db_xref="SGD:S000007187"	442733..443103	16	TRUE	160442733	160443103
chr16_ref v2	YPRWDELTA12	LTR	560474..560805	/experiment="experimental evidence, no additional details recorded"; /note="YPRWDELTA12"; /db_xref="SGD:S000007210"	560474..560805	16	FALSE	160560474	160560805
chr16_ref v2	YPRCDELTA13	LTR	complement(571838..572166)	/experiment="experimental evidence, no additional details recorded"; /note="YPRCDELTA13"; /db_xref="SGD:S000007200"	571838..572166	16	TRUE	160571838	160572166
chr16_ref v2	YPRWSIGMA2	LTR	769313..769653	/experiment="experimental evidence, no additional details recorded"; /note="YPRWSIGMA2"; /db_xref="SGD:S000007216"	769313..769653	16	FALSE	160769313	160769653
chr16_ref v2	YPRWDELTA14	LTR	776087..776407	/experiment="experimental evidence, no additional details recorded"; /note="YPRWDELTA14"; /db_xref="SGD:S000007211"	776087..776407	16	FALSE	160776087	160776407
chr16_ref v2	YPRCDELTA15	LTR	complement(776661..776790)	/experiment="experimental evidence, no additional details recorded"; /note="YPRCDELTA15"; /db_xref="SGD:S000007201"	776661..776790	16	TRUE	160776661	160776790
chr16_ref v2	YPRWDELTA16	LTR	777826..778148	/experiment="experimental evidence, no additional details recorded"; /note="YPRWDELTA16"; /db_xref="SGD:S000007212"	777826..778148	16	FALSE	160777826	160778148
chr16_ref v2	YPRWDELTA17	LTR	804505..804632	/experiment="experimental evidence, no additional details recorded"; /note="YPRWDELTA17"; /db_xref="SGD:S000007213"	804505..804632	16	FALSE	160804505	160804632
chr16_ref v2	YPRCDELTA18	LTR	complement(804639..804972)	/experiment="experimental evidence, no additional details recorded"; /note="YPRCDELTA18"; /db_xref="SGD:S000007202"	804639..804972	16	TRUE	160804639	160804972
chr16_ref v2	YPRCDELTA19	LTR	complement(810223..810556)	/experiment="experimental evidence, no additional details recorded"; /note="YPRCDELTA19"; /db_xref="SGD:S000007203"	810223..810556	16	TRUE	160810223	160810556
chr16_ref v2	YPRWDELTA20	LTR	844406..844743	/experiment="experimental evidence, no additional details recorded"; /note="YPRWDELTA20"; /db_xref="SGD:S000007214"	844406..844743	16	FALSE	160844406	160844743
chr16_ref v2	YPRWDELTA21	LTR	849997..850334	/experiment="experimental evidence, no additional details recorded"; /note="YPRWDELTA21"; /db_xref="SGD:S000007215"	849997..850334	16	FALSE	160849997	160850334
chr16_ref v2	YPRCDELTA22	LTR	complement(850351..850506)	/experiment="experimental evidence, no additional details recorded"; /note="YPRCDELTA22"; /db_xref="SGD:S000007204"	850351..850506	16	TRUE	160850351	160850506
chr16_ref v2	YPRCDELTA23	LTR	complement(850623..850960)	/experiment="experimental evidence, no additional details recorded"; /note="YPRCDELTA23"; /db_xref="SGD:S000007205"	850623..850960	16	TRUE	160850623	160850960
chr16_ref v2	YPRCDELTA24	LTR	complement(856211..856548)	/experiment="experimental evidence, no additional details recorded"; /note="YPRCDELTA24"; /db_xref="SGD:S000007206"	856211..856548	16	TRUE	160856211	160856548
chr16_ref v2	YPRWSIGMA3	LTR	856539..856879	/experiment="experimental evidence, no additional details recorded"; /note="YPRWSIGMA3"; /db_xref="SGD:S000007217"	856539..856879	16	FALSE	160856539	160856879
chr16_ref v2	YPRWSIGMA4	LTR	880379..880719	/experiment="experimental evidence, no additional details recorded"; /note="YPRWSIGMA4"; /db_xref="SGD:S000007218"	880379..880719	16	FALSE	160880379	160880719
chr16_ref v2	YPRCTAU3	LTR	complement(881480..881823)	/experiment="experimental evidence, no additional details recorded"; /note="YPRCTAU3"; /db_xref="SGD:S000007207"	881480..881823	16	TRUE	160881480	160881823
chr16_ref v2	YPRWTAU4	LTR	933063..933396	/experiment="experimental evidence, no additional details recorded"; /note="YPRWTAU4"; /db_xref="SGD:S000007219"	933063..933396	16	FALSE	160933063	160933396
chr1_ref v2	Telomeric Repeat	Repeat region	complement(1..62)	/gene="TEL01L-TR"; /inference="non-experimental evidence, no additional details recorded"; /note="Terminal stretch of telomeric repeats on the left arm of Chromosome I"; /rpt_family="Telomeric Repeat"; /db_xref="SGD:S000028864"	1..62	1	TRUE	10000001	10000062
chr1_ref v2	Telomeric Region	Repeat region	complement(1..801)	/gene="TEL01L"; /inference="non-experimental evidence, no additional details recorded"; /note="Telomeric region on the left arm of Chromosome I; composed of an X element core sequence, X element combinatorial repeats, and a short terminal stretch of telomeric repeats"; /rpt_family="Telomeric Region"; /db_xref="SGD:S000028862"	1..801	1	TRUE	10000001	10000801
chr1_ref v2	X element Combinatorial Repeats	Repeat region	complement(63..336)	/gene="TEL01L-XR"; /inference="non-experimental evidence, no additional details recorded"; /note="Telomeric X element combinatorial Repeat region on the left arm of Chromosome I; contains repeats of the D, C, B and A types, as well as Tbf1p binding sites; formerly called SubTelomeric Repeats"; /rpt_family="X element Combinatorial Repeats"; /db_xref="SGD:S000028866"	63..336	1	TRUE	10000063	10000336
chr1_ref v2	X element Core sequence	Repeat region	complement(337..801)	/gene="TEL01L-XC"; /inference="non-experimental evidence, no additional details recorded"; /note="Telomeric X element Core sequence on the left arm of Chromosome I; contains an ARS consensus sequence, an Abf1p binding site consensus sequence and two small overlapping ORFs (YAL068W-A and YAL069W)"; /rpt_family="X element Core sequence"; /db_xref="SGD:S000028865"	337..801	1	TRUE	10000337	10000801
chr1_ref v2	Transposon	Repeat region	complement(159950..165874)	/experiment="experimental evidence, no additional details recorded"; /note="Transposon YARCTY1-1; Long Terminal Repeat (LTR) retrotransposon of the Copia (Pseudoviridae) group; contains genes TYA Gag and TYB Pol, encoding proteins involved in structure and function of virus-like particles, flanked by two direct repeats; mutated in S288C YARCTY1-1"; /rpt_family="Transposon"; /db_xref="SGD:S0000067…	159950..165874	1	TRUE	10159950	10165874
chr1_ref v2	X element Core sequence	Repeat region	224806..224876	/gene="TEL01R-XC"; /inference="non-experimental evidence, no additional details recorded"; /note="Telomeric X element Core sequence on the right arm of Chromosome I, contains an ARS consensus sequence and an Abf1p binding site consensus sequence"; /rpt_family="X element Core sequence"; /db_xref="SGD:S000028939"	224806..224876	1	FALSE	10224806	10224876
chr1_ref v2	Telomeric Region	Repeat region	224806..225002	/gene="TEL01R"; /inference="non-experimental evidence, no additional details recorded"; /note="Telomeric region on the right arm of Chromosome I; composed of an X element core sequence and a short terminal stretch of telomeric repeats"; /rpt_family="Telomeric Region"; /db_xref="SGD:S000028937"	224806..225002	1	FALSE	10224806	10225002
chr1_ref v2	Telomeric Repeat	Repeat region	224905..225002	/gene="TEL01R-TR"; /inference="non-experimental evidence, no additional details recorded"; /note="Terminal stretch of telomeric repeats on the right arm of Chromosome I"; /rpt_family="Telomeric Repeat"; /db_xref="SGD:S000028938"	224905..225002	1	FALSE	10224905	10225002
chr2_ref v2	Y' element	Repeat region	complement(1..5848)	/gene="TEL02L-YP"; /inference="non-experimental evidence, no additional details recorded"; /note="Telomeric short Y' element on the left arm of Chromosome II; contains an ARS consensus sequence, a region of 36-bp repeats, and four ORFs (YBL111C, YBL112C, YBL113C, YBL113W-A)"; /rpt_family="Y' element"; /db_xref="SGD:S000028870"	1..5848	2	TRUE	20000001	20005848
chr2_ref v2	Telomeric Region	Repeat region	complement(1..6608)	/gene="TEL02L"; /inference="non-experimental evidence, no additional details recorded"; /note="Telomeric region on the left arm of Chromosome II; composed of an X element core sequence, X element combinatorial repeats, and a short Y' element"; /rpt_family="Telomeric Region"; /db_xref="SGD:S000028867"	1..6608	2	TRUE	20000001	20006608
chr2_ref v2	X element Combinatorial Repeats	Repeat region	complement(5849..6138)	/gene="TEL02L-XR"; /inference="non-experimental evidence, no additional details recorded"; /note="Telomeric X element combinatorial Repeat region on the left arm of Chromosome II; contains repeats of the D, C, B and A types, Tbf1p binding sites, and ORF YBL109W; formerly called SubTelomeric Repeats"; /rpt_family="X element Combinatorial Repeats"; /db_xref="SGD:S000028869"	5849..6138	2	TRUE	20005849	20006138
chr2_ref v2	X element Core sequence	Repeat region	complement(6139..6608)	/gene="TEL02L-XC"; /inference="non-experimental evidence, no additional details recorded"; /note="Telomeric X element Core sequence on the left arm of Chromosome II, contains an ARS consensus sequence and an Abf1p binding site consensus sequence"; /rpt_family="X element Core sequence"; /db_xref="SGD:S000028868"	6139..6608	2	TRUE	20006139	20006608
chr2_ref v2	Transposon	Repeat region	29642..35600	/experiment="experimental evidence, no additional details recorded"; /note="Transposon YBLWTY2-1; Long Terminal Repeat (LTR) retrotransposon of the Copia (Pseudoviridae) group; contains co-transcribed genes TYA Gag and TYB Pol, encoding proteins involved in structure and function of virus-like particles, flanked by two direct repeats YBLWTY2-1"; /rpt_family="Transposon"; /db_xref="SGD:S000006809"	29642..35600	2	FALSE	20029642	20035600
chr2_ref v2	Transposon	Repeat region	221028..226933	/experiment="experimental evidence, no additional details recorded"; /note="Transposon YBLWTY1-1; Long Terminal Repeat (LTR) retrotransposon of the Copia (Pseudoviridae) group; contains co-transcribed genes TYA Gag and TYB Pol, encoding proteins involved in structure and function of virus-like particles, flanked by two direct repeats YBLWTY1-1"; /rpt_family="Transposon"; /db_xref="SGD:S000006808"	221028..226933	2	FALSE	20221028	20226933
chr2_ref v2	Transposon	Repeat region	259559..265473	/experiment="experimental evidence, no additional details recorded"; /note="Transposon YBRWTY1-2; Long Terminal Repeat (LTR) retrotransposon of the Copia (Pseudoviridae) group; contains co-transcribed genes TYA Gag and TYB Pol, encoding proteins involved in structure and function of virus-like particles, flanked by two direct repeats YBRWTY1-2"; /rpt_family="Transposon"; /db_xref="SGD:S000006821"	259559..265473	2	FALSE	20259559	20265473
chr2_ref v2	X element Core sequence	Repeat region	812344..812813	/gene="TEL02R-XC"; /inference="non-experimental evidence, no additional details recorded"; /note="Telomeric X element Core sequence on the right arm of Chromosome II, contains an ARS consensus sequence and an Abf1p binding site consensus sequence"; /rpt_family="X element Core sequence"; /db_xref="SGD:S000028942"	812344..812813	2	FALSE	20812344	20812813
chr2_ref v2	Telomeric Region	Repeat region	812344..813149	/gene="TEL02R"; /inference="non-experimental evidence, no additional details recorded"; /note="Telomeric region on the right arm of Chromosome II; composed of an X element core sequence, X element combinatorial repeats, and a short terminal stretch of telomeric repeats"; /rpt_family="Telomeric Region"; /db_xref="SGD:S000028940"	812344..813149	2	FALSE	20812344	20813149
chr2_ref v2	X element Combinatorial Repeats	Repeat region	812814..813102	/gene="TEL02R-XR"; /inference="non-experimental evidence, no additional details recorded"; /note="Telomeric X element combinatorial Repeat region on the right arm of Chromosome II; contains repeats of the D, C, B and A types, as well as Tbf1p binding sites; formerly called SubTelomeric Repeats"; /rpt_family="X element Combinatorial Repeats"; /db_xref="SGD:S000028943"	812814..813102	2	FALSE	20812814	20813102
chr2_ref v2	Telomeric Repeat	Repeat region	813103..813149	/gene="TEL02R-TR"; /inference="non-experimental evidence, no additional details recorded"; /note="Terminal stretch of telomeric repeats on the right arm of Chromosome II"; /rpt_family="Telomeric Repeat"; /db_xref="SGD:S000028941"	813103..813149	2	FALSE	20813103	20813149
chr3_ref v2	Telomeric Region	Repeat region	complement(1..1096)	/gene="TEL03L"; /inference="non-experimental evidence, no additional details recorded"; /note="Telomeric region on the left arm of Chromosome III; composed of an X element core sequence, X element combinatorial repeats, and a terminal stretch of telomeric repeats"; /rpt_family="Telomeric Region"; /db_xref="SGD:S000028871"	1..1096	3	TRUE	30000001	30001096
chr3_ref v2	Telomeric Repeat	Repeat region	complement(1..360)	/gene="TEL03L-TR"; /inference="non-experimental evidence, no additional details recorded"; /note="Terminal stretch of telomeric repeats on the left arm of Chromosome III"; /rpt_family="Telomeric Repeat"; /db_xref="SGD:S000028872"	1..360	3	TRUE	30000001	30000360
chr3_ref v2	X element Combinatorial Repeats	Repeat region	complement(361..641)	/gene="TEL03L-XR"; /inference="non-experimental evidence, no additional details recorded"; /note="Telomeric X element combinatorial Repeat region on the left arm of Chromosome III; contains repeats of the D, C, B and A types, as well as Tbf1p binding sites; formerly called SubTelomeric Repeats"; /rpt_family="X element Combinatorial Repeats"; /db_xref="SGD:S000028874"	361..641	3	TRUE	30000361	30000641
chr3_ref v2	X element Core sequence	Repeat region	complement(642..1096)	/gene="TEL03L-XC"; /inference="non-experimental evidence, no additional details recorded"; /note="Telomeric X element Core sequence on the left arm of Chromosome III; contains an ARS consensus sequence and an Abf1p binding site"; /rpt_family="X element Core sequence"; /db_xref="SGD:S000028873"	642..1096	3	TRUE	30000642	30001096
chr3_ref v2	Transposon	Repeat region	1165..4212	/experiment="experimental evidence, no additional details recorded"; /note="Transposon YCLWTY5-1; Long Terminal Repeat (LTR) retrotransposon of the Copia (Pseudoviridae) group; this is the only near-full length Ty5 retrotransposon in S288C and it is non-functional; YCLWTY5-1"; /rpt_family="Transposon"; /db_xref="SGD:S000006831"	1165..4212	3	FALSE	30001165	30004212
chr3_ref v2	Transposon	Repeat region	84692..90650	/experiment="experimental evidence, no additional details recorded"; /note="Transposon YCLWTY2-1; Long Terminal Repeat (LTR) retrotransposon of the Copia (Pseudoviridae) group; contains co-transcribed genes TYA Gag and TYB Pol, encoding proteins involved in structure and function of virus-like particles, flanked by two direct repeats; YCLWTY2-1"; /rpt_family="Transposon"; /db_xref="SGD:S000006830"	84692..90650	3	FALSE	30084692	30090650
chr3_ref v2	X element Core sequence	Repeat region	311613..312066	/gene="TEL03R-XC"; /inference="non-experimental evidence, no additional details recorded"; /note="Telomeric X element Core sequence on the right arm of Chromosome III; contains an ARS consensus sequence, an Abf1p binding site consensus sequence, and ORF YCR108C"; /rpt_family="X element Core sequence"; /db_xref="SGD:S000028946"	311613..312066	3	FALSE	30311613	30312066
chr3_ref v2	Telomeric Region	Repeat region	311613..312447	/gene="TEL03R"; /inference="non-experimental evidence, no additional details recorded"; /note="Telomeric region on the right arm of Chromosome III; composed of an X element core sequence, X element combinatorial repeats, and a short terminal stretch of telomeric repeats"; /rpt_family="Telomeric Region"; /db_xref="SGD:S000028944"	311613..312447	3	FALSE	30311613	30312447
chr3_ref v2	X element Combinatorial Repeats	Repeat region	312067..312348	/gene="TEL03R-XR"; /inference="non-experimental evidence, no additional details recorded"; /note="Telomeric X element combinatorial Repeat region on the right arm of Chromosome III; contains repeats of the D, C, B and A types, as well as Tbf1p binding sites; formerly called SubTelomeric Repeats"; /rpt_family="X element Combinatorial Repeats"; /db_xref="SGD:S000028947"	312067..312348	3	FALSE	30312067	30312348
chr3_ref v2	Telomeric Repeat	Repeat region	312349..312447	/gene="TEL03R-TR"; /inference="non-experimental evidence, no additional details recorded"; /note="Terminal stretch of telomeric repeats on the right arm of Chromosome III"; /rpt_family="Telomeric Repeat"; /db_xref="SGD:S000028945"	312349..312447	3	FALSE	30312349	30312447
chr4_ref v2	Telomeric Repeat	Repeat region	complement(1..154)	/gene="TEL04L-TR"; /inference="non-experimental evidence, no additional details recorded"; /note="Terminal stretch of telomeric repeats on the left arm of Chromosome IV"; /rpt_family="Telomeric Repeat"; /db_xref="SGD:S000028876"	1..154	4	TRUE	40000001	40000154
chr4_ref v2	Telomeric Region	Repeat region	complement(1..904)	/gene="TEL04L"; /inference="non-experimental evidence, no additional details recorded"; /note="Telomeric region on the left arm of Chromosome IV; composed of an X element core sequence, X element combinatorial repeats, and a terminal stretch of telomeric repeats"; /rpt_family="Telomeric Region"; /db_xref="SGD:S000028875"	1..904	4	TRUE	40000001	40000904
chr4_ref v2	X element Combinatorial Repeats	Repeat region	complement(155..434)	/gene="TEL04L-XR"; /inference="non-experimental evidence, no additional details recorded"; /note="Telomeric X element combinatorial Repeat region on the left arm of Chromosome IV, spans 279 bp and contains repeats of the D, C, B and A types, as well as Tbf1p binding sites; formerly called SubTelomeric Repeats"; /rpt_family="X element Combinatorial Repeats"; /db_xref="SGD:S000028878"	155..434	4	TRUE	40000155	40000434
chr4_ref v2	X element Core sequence	Repeat region	complement(435..904)	/gene="TEL04L-XC"; /inference="non-experimental evidence, no additional details recorded"; /note="Telomeric X element Core sequence on the left arm of Chromosome IV, spans 469 bp and contains an ARS consensus sequence and an Abf1p binding site consensus sequence"; /rpt_family="X element Core sequence"; /db_xref="SGD:S000028877"	435..904	4	TRUE	40000435	40000904
chr4_ref v2	Transposon	Repeat region	complement(513631..519586)	/experiment="experimental evidence, no additional details recorded"; /note="Transposon YDRCTY2-1; Long Terminal Repeat (LTR) retrotransposon of the Copia (Pseudoviridae) group; contains co-transcribed genes TYA Gag and TYB Pol, encoding proteins involved in structure and function of virus-like particles, flanked by two direct repeats YDRCTY2-1"; /rpt_family="Transposon"; /db_xref="SGD:S000006862"	513631..519586	4	TRUE	40513631	40519586
chr4_ref v2	Transposon	Repeat region	complement(645417..651334)	/experiment="experimental evidence, no additional details recorded"; /note="Transposon YDRCTY1-1; Long Terminal Repeat (LTR) retrotransposon of the Copia (Pseudoviridae) group; contains co-transcribed genes TYA Gag and TYB Pol, encoding proteins involved in structure and function of virus-like particles, flanked by two direct repeats YDRCTY1-1"; /rpt_family="Transposon"; /db_xref="SGD:S000006859"	645417..651334	4	TRUE	40645417	40651334
chr4_ref v2	Transposon	Repeat region	871723..877681	/experiment="experimental evidence, no additional details recorded"; /note="Transposon YDRWTY2-2; Long Terminal Repeat (LTR) retrotransposon of the Copia (Pseudoviridae) group; contains co-transcribed genes TYA Gag and TYB Pol, encoding proteins involved in structure and function of virus-like particles, flanked by two direct repeats YDRWTY2-2"; /rpt_family="Transposon"; /db_xref="SGD:S000006884"	871723..877681	4	FALSE	40871723	40877681
chr4_ref v2	Transposon	Repeat region	complement(878205..884122)	/experiment="experimental evidence, no additional details recorded"; /note="Transposon YDRCTY1-2; Long Terminal Repeat (LTR) retrotransposon of the Copia (Pseudoviridae) group; contains co-transcribed genes TYA Gag and TYB Pol, encoding proteins involved in structure and function of virus-like particles, flanked by two direct repeats YDRCTY1-2"; /rpt_family="Transposon"; /db_xref="SGD:S000006860"	878205..884122	4	TRUE	40878205	40884122
chr4_ref v2	Transposon	Repeat region	981073..987027	/experiment="experimental evidence, no additional details recorded"; /note="Transposon YDRWTY2-3; Long Terminal Repeat (LTR) retrotransposon of the Copia (Pseudoviridae) group; contains co-transcribed genes TYA Gag and TYB Pol, encoding proteins involved in structure and function of virus-like particles, flanked by two direct repeats YDRWTY2-3"; /rpt_family="Transposon"; /db_xref="SGD:S000006885"	981073..987027	4	FALSE	40981073	40987027
chr4_ref v2	Transposon	Repeat region	complement(987052..992544)	/experiment="experimental evidence, no additional details recorded"; /note="Transposon YDRCTY1-3; Long Terminal Repeat (LTR) retrotransposon of the Copia (Pseudoviridae) group; contains genes TYA Gag and TYB Pol, encoding proteins involved in structure and function of virus-like particles, flanked by two direct repeats; mutated in S288C YDRCTY1-3"; /rpt_family="Transposon"; /db_xref="SGD:S0000068…	987052..992544	4	TRUE	40987052	40992544
chr4_ref v2	Transposon	Repeat region	1095670..1101595	/experiment="experimental evidence, no additional details recorded"; /note="Transposon YDRWTY1-4; Long Terminal Repeat (LTR) retrotransposon of the Copia (Pseudoviridae) group; contains co-transcribed genes TYA Gag and TYB Pol, encoding proteins involved in structure and function of virus-like particles, flanked by two direct repeats YDRWTY1-4"; /rpt_family="Transposon"; /db_xref="SGD:S000006882"	1095670..1101595	4	FALSE	41095670	41101595
chr4_ref v2	Transposon	Repeat region	1206608..1212525	/experiment="experimental evidence, no additional details recorded"; /note="Transposon YDRWTY1-5; Long Terminal Repeat (LTR) retrotransposon of the Copia (Pseudoviridae) group; contains co-transcribed genes TYA Gag and TYB Pol, encoding proteins involved in structure and function of virus-like particles, flanked by two direct repeats YDRWTY1-5"; /rpt_family="Transposon"; /db_xref="SGD:S000006883"	1206608..1212525	4	FALSE	41206608	41212525
chr4_ref v2	X element Core sequence	Repeat region	1524393..1524854	/gene="TEL04R-XC"; /inference="non-experimental evidence, no additional details recorded"; /note="Telomeric X element Core sequence on the right arm of Chromosome IV, spans 464 bp and contains an ARS consensus sequence, an Abf1p binding site consensus sequence, and ORF YDR543C"; /rpt_family="X element Core sequence"; /db_xref="SGD:S000028950"	1524393..1524854	4	FALSE	41524393	41524854
chr4_ref v2	Telomeric Region	Repeat region	1524393..1531659	/gene="TEL04R"; /inference="non-experimental evidence, no additional details recorded"; /note="Telomeric region on the right arm of Chromosome IV; composed of an X element core sequence, X element combinatorial repeats, a short stretch of telomeric repeats, and a long Y' element"; /rpt_family="Telomeric Region"; /db_xref="SGD:S000028948"	1524393..1531659	4	FALSE	41524393	41531659
chr4_ref v2	X element Combinatorial Repeats	Repeat region	1524855..1525096	/gene="TEL04R-XR"; /inference="non-experimental evidence, no additional details recorded"; /note="Telomeric X element combinatorial Repeat region on the right arm of Chromosome IV, spans 280 bp and contains repeats of the D, C, B and A types, Tbf1p binding sites, and ORF YDR544C; formerly called SubTelomeric Repeats"; /rpt_family="X element Combinatorial Repeats"; /db_xref="SGD:S000028951"	1524855..1525096	4	FALSE	41524855	41525096
chr4_ref v2	Telomeric Repeat	Repeat region	1525097..1525192	/gene="TEL04R-TR"; /inference="non-experimental evidence, no additional details recorded"; /note="Internal stretch of telomeric repeats on the right arm of Chromosome IV"; /rpt_family="Telomeric Repeat"; /db_xref="SGD:S000028949"	1525097..1525192	4	FALSE	41525097	41525192
chr4_ref v2	Y' element	Repeat region	1525193..1531659	/gene="TEL04R-YP"; /inference="non-experimental evidence, no additional details recorded"; /note="Telomeric long Y' element on the right arm of Chromosome IV, contains an ARS consensus sequence, a region of 36-bp repeats, and ORFs YRF1-1/YDR545W and YDR545C-A"; /rpt_family="Y' element"; /db_xref="SGD:S000028952"	1525193..1531659	4	FALSE	41525193	41531659
chr5_ref v2	Y' element	Repeat region	complement(1..6278)	/gene="TEL05L-YP"; /inference="non-experimental evidence, no additional details recorded"; /note="Telomeric long Y' element on the left arm of Chromosome V, contains an ARS consensus sequence, a region of 36-bp repeats, and six ORFs (YEL075C, YEL076C, YEL076C-A, YEL077C, YEL075W-A, YEL077W-A)"; /rpt_family="Y' element"; /db_xref="SGD:S000028881"	1..6278	5	TRUE	50000001	50006278
chr5_ref v2	Telomeric Region	Repeat region	complement(1..6473)	/gene="TEL05L"; /inference="non-experimental evidence, no additional details recorded"; /note="Telomeric region on the left arm of Chromosome V; composed of an X element core sequence and a long Y' element"; /rpt_family="Telomeric Region"; /db_xref="SGD:S000028879"	1..6473	5	TRUE	50000001	50006473
chr5_ref v2	X element Core sequence	Repeat region	complement(6279..6473)	/gene="TEL05L-XC"; /inference="non-experimental evidence, no additional details recorded"; /note="Telomeric X element Core sequence on the left arm of Chromosome V, contains an ARS consensus sequence and spans ORF YEL074W"; /rpt_family="X element Core sequence"; /db_xref="SGD:S000028880"	6279..6473	5	TRUE	50006279	50006473
chr5_ref v2	Transposon	Repeat region	complement(442242..448165)	/experiment="experimental evidence, no additional details recorded"; /note="Transposon YERCTY1-1; Long Terminal Repeat (LTR) retrotransposon of the Copia (Pseudoviridae) group; contains co-transcribed genes TYA Gag and TYB Pol, encoding proteins involved in structure and function of virus-like particles, flanked by two direct repeats; YERCTY1-1"; /rpt_family="Transposon"; /db_xref="SGD:S000006910"	442242..448165	5	TRUE	50442242	50448165
chr5_ref v2	Transposon	Repeat region	complement(491540..497266)	/experiment="experimental evidence, no additional details recorded"; /note="Transposon YERCTY1-2; Long Terminal Repeat (LTR) retrotransposon of the Copia (Pseudoviridae) group; contains co-transcribed genes TYA Gag and TYB Pol, encoding proteins involved in structure and function of virus-like particles, flanked by two direct repeats; YERCTY1-2"; /rpt_family="Transposon"; /db_xref="SGD:S000006911"	491540..497266	5	TRUE	50491540	50497266
chr5_ref v2	X element Core sequence	Repeat region	568444..568905	/gene="TEL05R-XC"; /inference="non-experimental evidence, no additional details recorded"; /note="Telomeric X element Core sequence on the right arm of Chromosome V, contains an ARS consensus sequence, an Abf1p binding site consensus sequence, and ORF YER188C-A"; /rpt_family="X element Core sequence"; /db_xref="SGD:S000028954"	568444..568905	5	FALSE	50568444	50568905
chr5_ref v2	Telomeric Region	Repeat region	568444..575719	/gene="TEL05R"; /inference="non-experimental evidence, no additional details recorded"; /note="Telomeric region on the right arm of Chromosome V; composed of an X element core sequence, X element combinatorial repeats, and a long Y' element"; /rpt_family="Telomeric Region"; /db_xref="SGD:S000028953"	568444..575719	5	FALSE	50568444	50575719
chr5_ref v2	X element Combinatorial Repeats	Repeat region	568906..569174	/gene="TEL05R-XR"; /inference="non-experimental evidence, no additional details recorded"; /note="Telomeric X element combinatorial Repeat region on the right arm of Chromosome V; contains repeats of the D, C, B and A types, as well as Tbf1p binding sites; Formerly called SubTelomeric Repeats"; /rpt_family="X element Combinatorial Repeats"; /db_xref="SGD:S000028955"	568906..569174	5	FALSE	50568906	50569174
chr5_ref v2	Y' element	Repeat region	569175..575719	/gene="TEL05R-YP"; /inference="non-experimental evidence, no additional details recorded"; /note="Telomeric long Y' element on the right arm of Chromosome V, contains an ARS consensus sequence, a region of 36-bp repeats, and four ORFs (YRF1-2/YER190W, YER189W, YER190C-A, YER190C-B)"; /rpt_family="Y' element"; /db_xref="SGD:S000028956"	569175..575719	5	FALSE	50569175	50575719
chr6_ref v2	Y' element	Repeat region	complement(1..4684)	/gene="TEL06L-YP"; /inference="non-experimental evidence, no additional details recorded"; /note="Telomeric short Y' element on the left arm of Chromosome VI, contains a region of 36-bp repeats and five ORFs (YFL064C, YFL065C, YFL066C, YFL067W, YFL068W)"; /rpt_family="Y' element"; /db_xref="SGD:S000028886"	1..4684	6	TRUE	60000001	60004684
chr6_ref v2	Telomeric Region	Repeat region	complement(1..5530)	/gene="TEL06L"; /inference="non-experimental evidence, no additional details recorded"; /note="Telomeric region on the left arm of Chromosome VI; composed of an X element core sequence, X element combinatorial repeats, a stretch of telomeric repeats, and a short Y' element"; /rpt_family="Telomeric Region"; /db_xref="SGD:S000028882"	1..5530	6	TRUE	60000001	60005530
chr6_ref v2	Telomeric Repeat	Repeat region	complement(4685..4819)	/gene="TEL06L-TR"; /inference="non-experimental evidence, no additional details recorded"; /note="Internal stretch of telomeric repeats on the left arm of Chromosome VI"; /rpt_family="Telomeric Repeat"; /db_xref="SGD:S000028883"	4685..4819	6	TRUE	60004685	60004819
chr6_ref v2	X element Combinatorial Repeats	Repeat region	complement(4820..5067)	/gene="TEL06L-XR"; /inference="non-experimental evidence, no additional details recorded"; /note="Telomeric X element combinatorial Repeat region on the left arm of Chromosome VI; contains repeats of the D, C, B and A types, as well as Tbf1p binding sites; formerly called SubTelomeric Repeats"; /rpt_family="X element Combinatorial Repeats"; /db_xref="SGD:S000028885"	4820..5067	6	TRUE	60004820	60005067
chr6_ref v2	X element Core sequence	Repeat region	complement(5068..5530)	/gene="TEL06L-XC"; /inference="non-experimental evidence, no additional details recorded"; /note="Telomeric X element Core sequence on the left arm of Chromosome VI, contains an ARS consensus sequence, an Abf1p binding site consensus sequence and ORF YFL063W"; /rpt_family="X element Core sequence"; /db_xref="SGD:S000028884"	5068..5530	6	TRUE	60005068	60005530
chr6_ref v2	Transposon	Repeat region	137915..143873	/experiment="experimental evidence, no additional details recorded"; /note="Transposon YFLWTY2-1; Long Terminal Repeat (LTR) retrotransposon of the Copia (Pseudoviridae) group; contains co-transcribed genes TYA Gag and TYB Pol, encoding proteins involved in structure and function of virus-like particles, flanked by two direct repeats YFLWTY2-1"; /rpt_family="Transposon"; /db_xref="SGD:S000006930"	137915..143873	6	FALSE	60137915	60143873
chr6_ref v2	X element Core sequence	Repeat region	269732..270113	/gene="TEL06R-XC"; /inference="non-experimental evidence, no additional details recorded"; /note="Telomeric X element Core sequence on the right arm of Chromosome VI, contains an ARS consensus sequence and an Abf1p binding site consensus sequence"; /rpt_family="X element Core sequence"; /db_xref="SGD:S000028959"	269732..270113	6	FALSE	60269732	60270113
chr6_ref v2	Telomeric Region	Repeat region	269732..270162	/gene="TEL06R"; /inference="non-experimental evidence, no additional details recorded"; /note="Telomeric region on the right arm of Chromosome VI; composed of an X element core sequence and a short terminal stretch of telomeric repeats"; /rpt_family="Telomeric Region"; /db_xref="SGD:S000028957"	269732..270162	6	FALSE	60269732	60270162
chr6_ref v2	Telomeric Repeat	Repeat region	270114..270162	/gene="TEL06R-TR"; /inference="non-experimental evidence, no additional details recorded"; /note="Terminal stretch of telomeric repeats on the right arm of Chromosome VI"; /rpt_family="Telomeric Repeat"; /db_xref="SGD:S000028958"	270114..270162	6	FALSE	60270114	60270162
chr7_ref v2	Telomeric Repeat	Repeat region	complement(1..34)	/gene="TEL07L-TR"; /inference="non-experimental evidence, no additional details recorded"; /note="Terminal stretch of telomeric repeats on the left arm of Chromosome VII"; /rpt_family="Telomeric Repeat"; /db_xref="SGD:S000028888"	1..34	7	TRUE	70000001	70000034
chr7_ref v2	Telomeric Region	Repeat region	complement(1..781)	/gene="TEL07L"; /inference="non-experimental evidence, no additional details recorded"; /note="Telomeric region on the left arm of Chromosome VII; composed of an X element core sequence, X element combinatorial repeats, and a short terminal stretch of telomeric repeats"; /rpt_family="Telomeric Region"; /db_xref="SGD:S000028887"	1..781	7	TRUE	70000001	70000781
chr7_ref v2	X element Combinatorial Repeats	Repeat region	complement(35..317)	/gene="TEL07L-XR"; /inference="non-experimental evidence, no additional details recorded"; /note="Telomeric X element combinatorial Repeat region on the left arm of Chromosome VII; contains repeats of the D, C, B and A types, as well as Tbf1p binding sites; formerly called SubTelomeric Repeats"; /rpt_family="X element Combinatorial Repeats"; /db_xref="SGD:S000028890"	35..317	7	TRUE	70000035	70000317
chr7_ref v2	X element Core sequence	Repeat region	complement(318..781)	/gene="TEL07L-XC"; /inference="non-experimental evidence, no additional details recorded"; /note="Telomeric X element Core sequence on the left arm of Chromosome VII, contains an ARS consensus sequence and an Abf1p binding site consensus sequence"; /rpt_family="X element Core sequence"; /db_xref="SGD:S000028889"	318..781	7	TRUE	70000318	70000781
chr7_ref v2	Transposon	Repeat region	535749..541674	/experiment="experimental evidence, no additional details recorded"; /note="Transposon YGRWTY1-1; Long Terminal Repeat (LTR) retrotransposon of the Copia (Pseudoviridae) group; contains co-transcribed genes TYA Gag and TYB Pol, encoding proteins involved in structure and function of virus-like particles, flanked by two direct repeats YGRWTY1-1"; /rpt_family="Transposon"; /db_xref="SGD:S000006982"	535749..541674	7	FALSE	70535749	70541674
chr7_ref v2	Transposon	Repeat region	complement(561832..567749)	/experiment="experimental evidence, no additional details recorded"; /note="Transposon YGRCTY1-2; Long Terminal Repeat (LTR) retrotransposon of the Copia (Pseudoviridae) group; contains co-transcribed genes TYA Gag and TYB Pol, encoding proteins involved in structure and function of virus-like particles, flanked by two direct repeats YGRCTY1-2"; /rpt_family="Transposon"; /db_xref="SGD:S000006962"	561832..567749	7	TRUE	70561832	70567749
chr7_ref v2	Transposon	Repeat region	complement(568729..574689)	/experiment="experimental evidence, no additional details recorded"; /note="Transposon YGRCTY2-1; Long Terminal Repeat (LTR) retrotransposon of the Copia (Pseudoviridae) group; contains genes TYA Gag and TYB Pol, encoding proteins involved in structure and function of virus-like particles, flanked by two direct repeats; mutated in S288C YGRCTY2-1"; /rpt_family="Transposon"; /db_xref="SGD:S0000069…	568729..574689	7	TRUE	70568729	70574689
chr7_ref v2	Transposon	Repeat region	707184..712459	/experiment="experimental evidence, no additional details recorded"; /note="Transposon YGRWTY3-1; Long Terminal Repeat (LTR) retrotransposon of the Gypsy (Metaviridae) group; contains co-transcribed genes TYA Gag and TYB Pol, encoding proteins involved in structure and function of virus-like particles, flanked by two direct repeats YGRWTY3-1"; /rpt_family="Transposon"; /db_xref="SGD:S000006984"	707184..712459	7	FALSE	70707184	70712459
chr7_ref v2	Transposon	Repeat region	811361..817311	/experiment="experimental evidence, no additional details recorded"; /note="Transposon YGRWTY2-2; Long Terminal Repeat (LTR) retrotransposon of the Copia (Pseudoviridae) group; contains co-transcribed genes TYA Gag and TYB Pol, encoding proteins involved in structure and function of virus-like particles, flanked by two direct repeats YGRWTY2-2"; /rpt_family="Transposon"; /db_xref="SGD:S000006983"	811361..817311	7	FALSE	70811361	70817311
chr7_ref v2	Transposon	Repeat region	complement(817307..823220)	/experiment="experimental evidence, no additional details recorded"; /note="Transposon YGRCTY1-3; Long Terminal Repeat (LTR) retrotransposon of the Copia (Pseudoviridae) group; contains co-transcribed genes TYA Gag and TYB Pol, encoding proteins involved in structure and function of virus-like particles, flanked by two direct repeats YGRCTY1-3"; /rpt_family="Transposon"; /db_xref="SGD:S000006963"	817307..823220	7	TRUE	70817307	70823220
chr7_ref v2	X element Core sequence	Repeat region	1083556..1084013	/gene="TEL07R-XC"; /inference="non-experimental evidence, no additional details recorded"; /note="Telomeric X element Core sequence on the right arm of Chromosome VII, contains an ARS consensus sequence and an Abf1p binding site consensus sequence"; /rpt_family="X element Core sequence"; /db_xref="SGD:S000028961"	1083556..1084013	7	FALSE	71083556	71084013
chr7_ref v2	Telomeric Region	Repeat region	1083556..1090861	/gene="TEL07R"; /inference="non-experimental evidence, no additional details recorded"; /note="Telomeric region on the right arm of Chromosome VII; composed of an X element core sequence, X element combinatorial repeats, and a long Y' element"; /rpt_family="Telomeric Region"; /db_xref="SGD:S000028960"	1083556..1090861	7	FALSE	71083556	71090861
chr7_ref v2	X element Combinatorial Repeats	Repeat region	1084014..1084267	/gene="TEL07R-XR"; /inference="non-experimental evidence, no additional details recorded"; /note="Telomeric X element combinatorial Repeat region on the right arm of Chromosome VII; contains repeats of the D, C, and B types; formerly called SubTelomeric Repeats"; /rpt_family="X element Combinatorial Repeats"; /db_xref="SGD:S000028962"	1084014..1084267	7	FALSE	71084014	71084267
chr7_ref v2	Y' element	Repeat region	1084268..1090861	/gene="TEL07R-YP"; /inference="non-experimental evidence, no additional details recorded"; /note="Telomeric long Y' element on the right arm of Chromosome VII, contains an ARS consensus sequence, a region of 36-bp repeats, and three ORFs (YRF1-3/YGR296W, YGR296C-A, YGR296C-B)"; /rpt_family="Y' element"; /db_xref="SGD:S000028963"	1084268..1090861	7	FALSE	71084268	71090861
chr8_ref v2	Telomeric Repeat	Repeat region	complement(1..35)	/gene="TEL08L-TR"; /inference="non-experimental evidence, no additional details recorded"; /note="Terminal stretch of telomeric repeats on the left arm of Chromosome VIII"; /rpt_family="Telomeric Repeat"; /db_xref="SGD:S000028892"	1..35	8	TRUE	80000001	80000035
chr8_ref v2	Telomeric Region	Repeat region	complement(1..5506)	/gene="TEL08L"; /inference="non-experimental evidence, no additional details recorded"; /note="Telomeric region on the left arm of Chromosome VIII, composed of an X element core sequence, an X element combinatorial repeat, a short Y' element, and a short terminal stretch of telomeric repeats"; /rpt_family="Telomeric Region"; /db_xref="SGD:S000028891"	1..5506	8	TRUE	80000001	80005506
chr8_ref v2	Y' element	Repeat region	complement(36..4952)	/gene="TEL08L-YP"; /inference="non-experimental evidence, no additional details recorded"; /note="Telomeric short Y' element on the left arm of Chromosome VIII, contains an ARS consensus sequence, a region of 36-bp repeats, and three ORFs (YHL049C, YHL050C, YHL050W-A)"; /rpt_family="Y' element"; /db_xref="SGD:S000028895"	36..4952	8	TRUE	80000036	80004952
chr8_ref v2	X element Combinatorial Repeats	Repeat region	complement(4953..5052)	/gene="TEL08L-XR"; /inference="non-experimental evidence, no additional details recorded"; /note="Telomeric X element combinatorial Repeat region on the left arm of Chromosome VIII, contains a D-type repeat; formerly called SubTelomeric Repeats"; /rpt_family="X element Combinatorial Repeats"; /db_xref="SGD:S000028894"	4953..5052	8	TRUE	80004953	80005052
chr8_ref v2	X element Core sequence	Repeat region	complement(5053..5506)	/gene="TEL08L-XC"; /inference="non-experimental evidence, no additional details recorded"; /note="Telomeric X element Core sequence on the left arm of Chromosome VIII, contains an ARS consensus sequence and an Abf1p binding site consensus sequence"; /rpt_family="X element Core sequence"; /db_xref="SGD:S000028893"	5053..5506	8	TRUE	80005053	80005506
chr8_ref v2	Transposon	Repeat region	85539..91761	/experiment="experimental evidence, no additional details recorded"; /note="Transposon YHLWTY4-1; Long Terminal Repeat (LTR) retrotransposon of the Copia (Pseudoviridae) group; contains co-transcribed genes TYA Gag and TYB Pol, encoding proteins involved in structure and function of virus-like particles, flanked by two direct repeats YHLWTY4-1"; /rpt_family="Transposon"; /db_xref="SGD:S000006991"	85539..91761	8	FALSE	80085539	80091761
chr8_ref v2	Transposon	Repeat region	complement(543616..549643)	/experiment="experimental evidence, no additional details recorded"; /note="Transposon YHRCTY1-1; Long Terminal Repeat (LTR) retrotransposon of the Copia (Pseudoviridae) group; contains co-transcribed genes TYA Gag and TYB Pol, encoding proteins involved in structure and function of virus-like particles, flanked by two direct repeats YHRCTY1-1"; /rpt_family="Transposon"; /db_xref="SGD:S000007006"	543616..549643	8	TRUE	80543616	80549643
chr8_ref v2	X element Core sequence	Repeat region	556112..556582	/gene="TEL08R-XC"; /inference="non-experimental evidence, no additional details recorded"; /note="Telomeric X element Core sequence on the right arm of Chromosome VIII, contains an ARS consensus sequence and an Abf1p binding site consensus sequence"; /rpt_family="X element Core sequence"; /db_xref="SGD:S000028967"	556112..556582	8	FALSE	80556112	80556582
chr8_ref v2	Telomeric Region	Repeat region	556112..562650	/gene="TEL08R"; /inference="non-experimental evidence, no additional details recorded"; /note="Telomeric region on the right arm of Chromosome VIII, composed of an X element core sequence, X element combinatorial repeats, an internal stretch of telomeric repeats, a short Y' element, and a terminal stretch of telomeric repeats"; /rpt_family="Telomeric Region"; /db_xref="SGD:S000028964"	556112..562650	8	FALSE	80556112	80562650
chr8_ref v2	X element Combinatorial Repeats	Repeat region	556583..556838	/gene="TEL08R-XR"; /inference="non-experimental evidence, no additional details recorded"; /note="Telomeric X element combinatorial Repeat region on the right arm of Chromosome VIII; contains repeats of the D, C, and B types; formerly called SubTelomeric Repeats"; /rpt_family="X element Combinatorial Repeats"; /db_xref="SGD:S000028968"	556583..556838	8	FALSE	80556583	80556838
chr8_ref v2	Telomeric Repeat	Repeat region	556839..556992	/gene="TEL08R-TR2"; /inference="non-experimental evidence, no additional details recorded"; /note="Internal stretch of telomeric repeats on the right arm of Chromosome VIII"; /rpt_family="Telomeric Repeat"; /db_xref="SGD:S000028966"	556839..556992	8	FALSE	80556839	80556992
chr8_ref v2	Y' element	Repeat region	556993..562463	/gene="TEL08R-YP"; /inference="non-experimental evidence, no additional details recorded"; /note="Telomeric short Y' element on the right arm of Chromosome VIII, contains an ARS consensus sequence, a region of 36-bp repeats, and four ORFs (YHR218W, YHR219W, YHR218W-A, YHR219C-A)"; /rpt_family="Y' element"; /db_xref="SGD:S000028969"	556993..562463	8	FALSE	80556993	80562463
chr8_ref v2	Telomeric Repeat	Repeat region	562464..562650	/gene="TEL08R-TR1"; /inference="non-experimental evidence, no additional details recorded"; /note="Terminal stretch of telomeric repeats on the right arm of Chromosome VIII"; /rpt_family="Telomeric Repeat"; /db_xref="SGD:S000028965"	562464..562650	8	FALSE	80562464	80562650
chr9_ref v2	Telomeric Repeat	Repeat region	complement(1..77)	/gene="TEL09L-TR"; /inference="non-experimental evidence, no additional details recorded"; /note="Terminal stretch of telomeric repeats on the left arm of Chromosome IX"; /rpt_family="Telomeric Repeat"; /db_xref="SGD:S000028897"	1..77	9	TRUE	90000001	90000077
chr9_ref v2	Telomeric Region	Repeat region	complement(1..7785)	/gene="TEL09L"; /inference="non-experimental evidence, no additional details recorded"; /note="Telomeric region on the left arm of Chromosome IX, composed of an X element core sequence, X element combinatorial repeats, a long Y' element, and a short terminal stretch of telomeric repeats"; /rpt_family="Telomeric Region"; /db_xref="SGD:S000028896"	1..7785	9	TRUE	90000001	90007785
chr9_ref v2	Y' element	Repeat region	complement(78..6949)	/gene="TEL09L-YP"; /inference="non-experimental evidence, no additional details recorded"; /note="Telomeric long Y' element on the left arm of Chromosome IX, contains an ARS consensus sequence, a region of 36-bp repeats, and two ORFs YIL177C and YIL177W-A"; /rpt_family="Y' element"; /db_xref="SGD:S000028900"	78..6949	9	TRUE	90000078	90006949
chr9_ref v2	X element Combinatorial Repeats	Repeat region	complement(6950..7322)	/gene="TEL09L-XR"; /inference="non-experimental evidence, no additional details recorded"; /note="Telomeric X element combinatorial Repeat region on the left arm of Chromosome IX; contains a repeat of the D type with a group I mitochondrial bI4 intron insertion; formerly called SubTelomeric Repeats"; /rpt_family="X element Combinatorial Repeats"; /db_xref="SGD:S000028899"	6950..7322	9	TRUE	90006950	90007322
chr9_ref v2	X element Core sequence	Repeat region	complement(7323..7785)	/gene="TEL09L-XC"; /inference="non-experimental evidence, no additional details recorded"; /note="Telomeric X element Core sequence on the left arm of Chromosome IX, contains an ARS consensus sequence and an Abf1p binding site consensus sequence"; /rpt_family="X element Core sequence"; /db_xref="SGD:S000028898"	7323..7785	9	TRUE	90007323	90007785
chr9_ref v2	Transposon	Repeat region	205185..210612	/experiment="experimental evidence, no additional details recorded"; /note="Transposon YILWTY3-1; Long Terminal Repeat (LTR) retrotransposon of the Gypsy (Metaviridae) group; contains co-transcribed genes TYA Gag and TYB Pol, encoding proteins involved in structure and function of virus-like particles, flanked by two direct repeats YILWTY3-1"; /rpt_family="Transposon"; /db_xref="SGD:S000007020"	205185..210612	9	FALSE	90205185	90210612
chr9_ref v2	X element Core sequence	Repeat region	438261..438726	/gene="TEL09R-XC"; /inference="non-experimental evidence, no additional details recorded"; /note="Telomeric X element Core sequence on the right arm of Chromosome IX, contains an ARS consensus sequence and an Abf1p binding site consensus sequence"; /rpt_family="X element Core sequence"; /db_xref="SGD:S000028972"	438261..438726	9	FALSE	90438261	90438726
chr9_ref v2	Telomeric Region	Repeat region	438261..439081	/gene="TEL09R"; /inference="non-experimental evidence, no additional details recorded"; /note="Telomeric region on the right arm of Chromosome IX, composed of an X element core sequence, X element combinatorial repeats, and a short terminal stretch of telomeric repeats"; /rpt_family="Telomeric Region"; /db_xref="SGD:S000028970"	438261..439081	9	FALSE	90438261	90439081
chr9_ref v2	X element Combinatorial Repeats	Repeat region	438727..439008	/gene="TEL09R-XR"; /inference="non-experimental evidence, no additional details recorded"; /note="Telomeric X element combinatorial Repeat region on the right arm of Chromosome IX; contains repeats of the D, C, B and A types, as well as Tbf1p binding sites; formerly called SubTelomeric Repeats"; /rpt_family="X element Combinatorial Repeats"; /db_xref="SGD:S000028973"	438727..439008	9	FALSE	90438727	90439008
chr9_ref v2	Telomeric Repeat	Repeat region	439009..439081	/gene="TEL09R-TR"; /inference="non-experimental evidence, no additional details recorded"; /note="Terminal stretch of telomeric repeats on the right arm of Chromosome IX"; /rpt_family="Telomeric Repeat"; /db_xref="SGD:S000028971"	439009..439081	9	FALSE	90439009	90439081
chr10_ref v2	Telomeric Repeat	Repeat region	complement(1..60)	/gene="TEL10L-TR"; /inference="non-experimental evidence, no additional details recorded"; /note="Terminal stretch of telomeric repeats on the left arm of Chromosome X"; /rpt_family="Telomeric Repeat"; /db_xref="SGD:S000028902"	1..60	10	TRUE	100000001	100000060
chr10_ref v2	Telomeric Region	Repeat region	complement(1..7768)	/gene="TEL10L"; /inference="non-experimental evidence, no additional details recorded"; /note="Telomeric region on the left arm of Chromosome X, composed of an X element core sequence, X element combinatorial repeats, a long Y' element, and a short terminal stretch of telomeric repeats"; /rpt_family="Telomeric Region"; /db_xref="SGD:S000028901"	1..7768	10	TRUE	100000001	100007768
chr10_ref v2	Y' element	Repeat region	complement(61..6932)	/gene="TEL10L-YP"; /inference="non-experimental evidence, no additional details recorded"; /note="Telomeric long Y' element on the left arm of Chromosome X, contains an ARS consensus sequence, a region of 36-bp repeats, and two ORFs YJL225C and YJL225W-A"; /rpt_family="Y' element"; /db_xref="SGD:S000028905"	61..6932	10	TRUE	100000061	100006932
chr10_ref v2	X element Combinatorial Repeats	Repeat region	complement(6933..7305)	/gene="TEL10L-XR"; /inference="non-experimental evidence, no additional details recorded"; /note="Telomeric X element combinatorial Repeat region on the left arm of Chromosome X; contains a repeat of the D type with a group I mitochondrial bI4 intron insertion; formerly called SubTelomeric Repeats"; /rpt_family="X element Combinatorial Repeats"; /db_xref="SGD:S000028904"	6933..7305	10	TRUE	100006933	100007305
chr10_ref v2	X element Core sequence	Repeat region	complement(7306..7768)	/gene="TEL10L-XC"; /inference="non-experimental evidence, no additional details recorded"; /note="Telomeric X element Core sequence on the left arm of Chromosome X, contains an ARS consensus sequence and an Abf1p binding site consensus sequence"; /rpt_family="X element Core sequence"; /db_xref="SGD:S000028903"	7306..7768	10	TRUE	100007306	100007768
chr10_ref v2	Transposon	Repeat region	197539..203576	/experiment="experimental evidence, no additional details recorded"; /note="Transposon YJLWTY4-1; Long Terminal Repeat (LTR) retrotransposon of the Copia (Pseudoviridae) group; contains co-transcribed genes TYA Gag and TYB Pol, encoding proteins involved in structure and function of virus-like particles, flanked by two direct repeats YJLWTY4-1"; /rpt_family="Transposon"; /db_xref="SGD:S000007039"	197539..203576	10	FALSE	100197539	100203576
chr10_ref v2	Transposon	Repeat region	472116..478037	/experiment="experimental evidence, no additional details recorded"; /note="Transposon YJRWTY1-1; Long Terminal Repeat (LTR) retrotransposon of the Copia (Pseudoviridae) group; contains co-transcribed genes TYA Gag and TYB Pol, encoding proteins involved in structure and function of virus-like particles, flanked by two direct repeats YJRWTY1-1"; /rpt_family="Transposon"; /db_xref="SGD:S000007048"	472116..478037	10	FALSE	100472116	100478037
chr10_ref v2	Transposon	Repeat region	477704..483625	/experiment="experimental evidence, no additional details recorded"; /note="Transposon YJRWTY1-2; Long Terminal Repeat (LTR) retrotransposon of the Copia (Pseudoviridae) group; contains co-transcribed genes TYA Gag and TYB Pol, encoding proteins involved in structure and function of virus-like particles, flanked by two direct repeats YJRWTY1-2"; /rpt_family="Transposon"; /db_xref="SGD:S000007049"	477704..483625	10	FALSE	100477704	100483625
chr10_ref v2	X element Core sequence	Repeat region	744492..744951	/gene="TEL10R-XC"; /inference="non-experimental evidence, no additional details recorded"; /note="Telomeric X element Core sequence on the right arm of Chromosome X; contains an ARS consensus sequence, an Abf1p binding site consensus sequence, and ORF YJR162C"; /rpt_family="X element Core sequence"; /db_xref="SGD:S000028976"	744492..744951	10	FALSE	100744492	100744951
chr10_ref v2	Telomeric Region	Repeat region	744492..745341	/gene="TEL10R"; /inference="non-experimental evidence, no additional details recorded"; /note="Telomeric region on the right arm of Chromosome X, composed of an X element core sequence, X element combinatorial repeats, and a short terminal stretch of telomeric repeats"; /rpt_family="Telomeric Region"; /db_xref="SGD:S000028974"	744492..745341	10	FALSE	100744492	100745341
chr10_ref v2	X element Combinatorial Repeats	Repeat region	744952..745252	/gene="TEL10R-XR"; /inference="non-experimental evidence, no additional details recorded"; /note="Telomeric X element combinatorial Repeat region on the right arm of Chromosome X; contains repeats of the D, C, B and A types, as well as Tbf1p binding sites; formerly called SubTelomeric Repeats"; /rpt_family="X element Combinatorial Repeats"; /db_xref="SGD:S000028977"	744952..745252	10	FALSE	100744952	100745252
chr10_ref v2	Telomeric Repeat	Repeat region	745253..745341	/gene="TEL10R-TR"; /inference="non-experimental evidence, no additional details recorded"; /note="Terminal stretch of telomeric repeats on the right arm of Chromosome X"; /rpt_family="Telomeric Repeat"; /db_xref="SGD:S000028975"	745253..745341	10	FALSE	100745253	100745341
chr11_ref v2	Telomeric Repeat	Repeat region	complement(1..65)	/gene="TEL11L-TR"; /inference="non-experimental evidence, no additional details recorded"; /note="Terminal stretch of telomeric repeats on the left arm of Chromosome XI"; /rpt_family="Telomeric Repeat"; /db_xref="SGD:S000028907"	1..65	11	TRUE	110000001	110000065
chr11_ref v2	Telomeric Region	Repeat region	complement(1..806)	/gene="TEL11L"; /inference="non-experimental evidence, no additional details recorded"; /note="Telomeric region on the left arm of Chromosome XI, composed of an X element core sequence, X element combinatorial repeats, and a short terminal stretch of telomeric repeats"; /rpt_family="Telomeric Region"; /db_xref="SGD:S000028906"	1..806	11	TRUE	110000001	110000806
chr11_ref v2	X element Combinatorial Repeats	Repeat region	complement(66..344)	/gene="TEL11L-XR"; /inference="non-experimental evidence, no additional details recorded"; /note="Telomeric X element combinatorial Repeat region on the left arm of Chromosome XI; contains repeats of the D, C, B and A types, as well as Tbf1p binding sites; formerly called SubTelomeric Repeats"; /rpt_family="X element Combinatorial Repeats"; /db_xref="SGD:S000028909"	66..344	11	TRUE	110000066	110000344
chr11_ref v2	X element Core sequence	Repeat region	complement(345..806)	/gene="TEL11L-XC"; /inference="non-experimental evidence, no additional details recorded"; /note="Telomeric X element Core sequence on the left arm of Chromosome XI; contains an ARS consensus sequence, an Abf1p binding site consensus sequence, and ORF YKL225W"; /rpt_family="X element Core sequence"; /db_xref="SGD:S000028908"	345..806	11	TRUE	110000345	110000806
chr11_ref v2	X element Core sequence	Repeat region	665536..665996	/gene="TEL11R-XC"; /inference="non-experimental evidence, no additional details recorded"; /note="Telomeric X element Core sequence on the right arm of Chromosome XI, contains an ARS consensus sequence and an Abf1p binding site consensus sequence"; /rpt_family="X element Core sequence"; /db_xref="SGD:S000028980"	665536..665996	11	FALSE	110665536	110665996
chr11_ref v2	Telomeric Region	Repeat region	665536..666447	/gene="TEL11R"; /inference="non-experimental evidence, no additional details recorded"; /note="Telomeric region on the right arm of Chromosome XI, composed of an X element core sequence, X element combinatorial repeats, and a terminal stretch of telomeric repeats"; /rpt_family="Telomeric Region"; /db_xref="SGD:S000028978"	665536..666447	11	FALSE	110665536	110666447
chr11_ref v2	X element Combinatorial Repeats	Repeat region	665997..666239	/gene="TEL11R-XR"; /inference="non-experimental evidence, no additional details recorded"; /note="Telomeric X element combinatorial Repeat region on the right arm of Chromosome XI; contains repeats of the D, C, B and A types, as well as Tbf1p binding sites; formerly called SubTelomeric Repeats"; /rpt_family="X element Combinatorial Repeats"; /db_xref="SGD:S000028981"	665997..666239	11	FALSE	110665997	110666239
chr11_ref v2	Telomeric Repeat	Repeat region	666240..666447	/gene="TEL11R-TR"; /inference="non-experimental evidence, no additional details recorded"; /note="Terminal stretch of telomeric repeats on the right arm of Chromosome XI"; /rpt_family="Telomeric Repeat"; /db_xref="SGD:S000028979"	666240..666447	11	FALSE	110666240	110666447
chr12_ref v2	Telomeric Region	Repeat region	complement(1..12085)	/gene="TEL12L"; /inference="non-experimental evidence, no additional details recorded"; /note="Telomeric region on the left arm of Chromosome XII, composed of an X element core sequence, X element combinatorial repeats, and three distinct regions of telomeric repeats separated by two short Y' elements"; /rpt_family="Telomeric Region"; /db_xref="SGD:S000028910"	1..12085	12	TRUE	120000001	120012085
chr12_ref v2	Telomeric Repeat	Repeat region	complement(1..75)	/gene="TEL12L-TR1"; /inference="non-experimental evidence, no additional details recorded"; /note="Terminal stretch of telomeric repeats on the left arm of Chromosome XII"; /rpt_family="Telomeric Repeat"; /db_xref="SGD:S000028911"	1..75	12	TRUE	120000001	120000075
chr12_ref v2	Y' element	Repeat region	complement(76..5661)	/gene="TEL12L-YP1"; /inference="non-experimental evidence, no additional details recorded"; /note="More end-proximal of two short telomeric Y' elements on the left arm of Chromosome XII; contains an ARS consensus sequence, a region of 36-bp repeats, and two ORFs YLL067C and YLL067W-A"; /rpt_family="Y' element"; /db_xref="SGD:S000028916"	76..5661	12	TRUE	120000076	120005661
chr12_ref v2	Telomeric Repeat	Repeat region	complement(5662..5723)	/gene="TEL12L-TR2"; /inference="non-experimental evidence, no additional details recorded"; /note="Middle stretch of telomeric repeats on the left arm of Chromosome XII"; /rpt_family="Telomeric Repeat"; /db_xref="SGD:S000028912"	5662..5723	12	TRUE	120005662	120005723
chr12_ref v2	Y' element	Repeat region	complement(5724..11196)	/gene="TEL12L-YP2"; /inference="non-experimental evidence, no additional details recorded"; /note="More centromere-proximal of two short Y' elements in the left telomere of Chromosome XII; contains an ARS consensus sequence, a region of 36-bp repeats, and two ORFs YLL066C and YLL066W-A"; /rpt_family="Y' element"; /db_xref="SGD:S000028917"	5724..11196	12	TRUE	120005724	120011196
chr12_ref v2	Telomeric Repeat	Repeat region	complement(11197..11358)	/gene="TEL12L-TR3"; /inference="non-experimental evidence, no additional details recorded"; /note="Internal stretch of telomeric repeats on the left arm of Chromosome XII"; /rpt_family="Telomeric Repeat"; /db_xref="SGD:S000028913"	11197..11358	12	TRUE	120011197	120011358
chr12_ref v2	X element Combinatorial Repeats	Repeat region	complement(11359..11625)	/gene="TEL12L-XR"; /inference="non-experimental evidence, no additional details recorded"; /note="Telomeric X element combinatorial Repeat region on the left arm of Chromosome XII; contains repeats of the D, C, B and A types, as well as Tbf1p binding sites; formerly called SubTelomeric Repeats"; /rpt_family="X element Combinatorial Repeats"; /db_xref="SGD:S000028915"	11359..11625	12	TRUE	120011359	120011625
chr12_ref v2	X element Core sequence	Repeat region	complement(11626..12085)	/gene="TEL12L-XC"; /inference="non-experimental evidence, no additional details recorded"; /note="Telomeric X element Core sequence on the left arm of Chromosome XII; contains an ARS consensus sequence, an Abf1p binding site consensus sequence, and ORF YLL065W"; /rpt_family="X element Core sequence"; /db_xref="SGD:S000028914"	11626..12085	12	TRUE	120011626	120012085
chr12_ref v2	Transposon	Repeat region	complement(475885..481806)	/experiment="experimental evidence, no additional details recorded"; /note="Transposon YLRCTY1-1; Long Terminal Repeat (LTR) retrotransposon of the Copia (Pseudoviridae) group; contains co-transcribed genes TYA Gag and TYB Pol, encoding proteins involved in structure and function of virus-like particles, flanked by two direct repeats YLRCTY1-1"; /rpt_family="Transposon"; /db_xref="SGD:S000007081"	475885..481806	12	TRUE	120475885	120481806
chr12_ref v2	Transposon	Repeat region	593054..598971	/experiment="experimental evidence, no additional details recorded"; /note="Transposon YLRWTY1-2; Long Terminal Repeat (LTR) retrotransposon of the Copia (Pseudoviridae) group; contains co-transcribed genes TYA Gag and TYB Pol, encoding proteins involved in structure and function of virus-like particles, flanked by two direct repeats YLRWTY1-2"; /rpt_family="Transposon"; /db_xref="SGD:S000007098"	593054..598971	12	FALSE	120593054	120598971
chr12_ref v2	Transposon	Repeat region	650733..656652	/experiment="experimental evidence, no additional details recorded"; /note="Transposon YLRWTY1-3; Long Terminal Repeat (LTR) retrotransposon of the Copia (Pseudoviridae) group; contains co-transcribed genes TYA Gag and TYB Pol, encoding proteins involved in structure and function of virus-like particles, flanked by two direct repeats YLRWTY1-3"; /rpt_family="Transposon"; /db_xref="SGD:S000007099"	650733..656652	12	FALSE	120650733	120656652
chr12_ref v2	Transposon	Repeat region	941103..947061	/experiment="experimental evidence, no additional details recorded"; /note="Transposon YLRWTY2-1; Long Terminal Repeat (LTR) retrotransposon of the Copia (Pseudoviridae) group; contains co-transcribed genes TYA Gag and TYB Pol, encoding proteins involved in structure and function of virus-like particles, flanked by two direct repeats YLRWTY2-1"; /rpt_family="Transposon"; /db_xref="SGD:S000007100"	941103..947061	12	FALSE	120941103	120947061
chr12_ref v2	Transposon	Repeat region	complement(976169..981611)	/experiment="experimental evidence, no additional details recorded"; /note="Transposon YLRCTY2-2; Long Terminal Repeat (LTR) retrotransposon of the Copia (Pseudoviridae) group; contains genes TYA Gag and TYB Pol, encoding proteins involved in structure and function of virus-like particles, flanked by two direct repeats; mutated in S288C YLRCTY2-2"; /rpt_family="Transposon"; /db_xref="SGD:S0000070…	976169..981611	12	TRUE	120976169	120981611
chr12_ref v2	X element Core sequence	Repeat region	1064193..1064659	/gene="TEL12R-XC"; /inference="non-experimental evidence, no additional details recorded"; /note="Telomeric X element Core sequence on the right arm of Chromosome XII, contains an ARS consensus sequence and an Abf1p binding site consensus sequence"; /rpt_family="X element Core sequence"; /db_xref="SGD:S000028985"	1064193..1064659	12	FALSE	121064193	121064659
chr12_ref v2	Telomeric Region	Repeat region	1064193..1078089	/gene="TEL12R"; /inference="non-experimental evidence, no additional details recorded"; /note="Telomeric region on the right arm of Chromosome XII, composed of an X element core sequence, X element combinatorial repeats, two distinct regions of telomeric repeats, and two long Y' elements"; /rpt_family="Telomeric Region"; /db_xref="SGD:S000028982"	1064193..1078089	12	FALSE	121064193	121078089
chr12_ref v2	X element Combinatorial Repeats	Repeat region	1064660..1064942	/gene="TEL12R-XR"; /inference="non-experimental evidence, no additional details recorded"; /note="Telomeric X element combinatorial Repeat region on the right arm of Chromosome XII; contains repeats of the D, C, B and A types, as well as Tbf1p binding sites; formerly called SubTelomeric Repeats"; /rpt_family="X element Combinatorial Repeats"; /db_xref="SGD:S000028986"	1064660..1064942	12	FALSE	121064660	121064942
chr12_ref v2	Telomeric Repeat	Repeat region	1064943..1065067	/gene="TEL12R-TR2"; /inference="non-experimental evidence, no additional details recorded"; /note="Internal stretch of telomeric repeats on the right arm of Chromosome XII"; /rpt_family="Telomeric Repeat"; /db_xref="SGD:S000028984"	1064943..1065067	12	FALSE	121064943	121065067
chr12_ref v2	Y' element	Repeat region	1065068..1071557	/gene="TEL12R-YP2"; /inference="non-experimental evidence, no additional details recorded"; /note="More centromere-proximal of two long telomeric Y' elements on the right arm of Chromosome XII, contains an ARS consensus sequence, a region of 36-bp repeats, 5 ORFs (YLR466W, YLR462W, YLR464W, YLR463C, YLR465C), and part of ORF YLR466C-B"; /rpt_family="Y' element"; /db_xref="SGD:S000028988"	1065068..1071557	12	FALSE	121065068	121071557
chr12_ref v2	Telomeric Repeat	Repeat region	1071558..1071565	/gene="TEL12R-TR1"; /inference="non-experimental evidence, no additional details recorded"; /note="Internal stretch of telomeric repeats on the right arm of Chromosome XII"; /rpt_family="Telomeric Repeat"; /db_xref="SGD:S000028983"	1071558..1071565	12	FALSE	121071558	121071565
chr12_ref v2	Y' element	Repeat region	1071566..1078089	/gene="TEL12R-YP1"; /inference="non-experimental evidence, no additional details recorded"; /note="More end-proximal of two long telomeric Y' elements on the right arm of Chromosome XII; contains an ARS consensus sequence, a region of 36-bp repeats, ORFs YRF1-5/YLR467W and YLR467C-A, and part of ORF YLR466C-B"; /rpt_family="Y' element"; /db_xref="SGD:S000028987"	1071566..1078089	12	FALSE	121071566	121078089
chr13_ref v2	Telomeric Repeat	Repeat region	complement(1..51)	/gene="TEL13L-TR1"; /inference="non-experimental evidence, no additional details recorded"; /note="Terminal stretch of telomeric repeats on the left arm of Chromosome XIII"; /rpt_family="Telomeric Repeat"; /db_xref="SGD:S000028919"	1..51	13	TRUE	130000001	130000051
chr13_ref v2	Telomeric Region	Repeat region	complement(1..6344)	/gene="TEL13L"; /inference="non-experimental evidence, no additional details recorded"; /note="Telomeric region on the left arm of Chromosome XIII, composed of an X element core sequence, X element combinatorial repeats, a short region of telomeric repeats, a short Y' element, and a short terminal region of telomeric repeats"; /rpt_family="Telomeric Region"; /db_xref="SGD:S000028918"	1..6344	13	TRUE	130000001	130006344
chr13_ref v2	Y' element	Repeat region	complement(52..5537)	/gene="TEL13L-YP"; /inference="non-experimental evidence, no additional details recorded"; /note="Telomeric short Y' element on the left arm of Chromosome XIII; contains an ARS consensus sequence, a region of 36-bp repeats, and three ORFs (YML133C, YML133W-A, YML133W-B)"; /rpt_family="Y' element"; /db_xref="SGD:S000028923"	52..5537	13	TRUE	130000052	130005537
chr13_ref v2	Telomeric Repeat	Repeat region	complement(5538..5585)	/gene="TEL13L-TR2"; /inference="non-experimental evidence, no additional details recorded"; /note="Internal stretch of telomeric repeats on the left arm of Chromosome XIII"; /rpt_family="Telomeric Repeat"; /db_xref="SGD:S000028920"	5538..5585	13	TRUE	130005538	130005585
chr13_ref v2	X element Combinatorial Repeats	Repeat region	complement(5586..5874)	/gene="TEL13L-XR"; /inference="non-experimental evidence, no additional details recorded"; /note="Telomeric X element combinatorial Repeat region on the left arm of Chromosome XIII; contains repeats of the D, C, B and A types, as well as Tbf1p binding sites; formerly called SubTelomeric Repeats"; /rpt_family="X element Combinatorial Repeats"; /db_xref="SGD:S000028922"	5586..5874	13	TRUE	130005586	130005874
chr13_ref v2	X element Core sequence	Repeat region	complement(5875..6344)	/gene="TEL13L-XC"; /inference="non-experimental evidence, no additional details recorded"; /note="Telomeric X element Core sequence on the left arm of Chromosome XIII, contains an ARS consensus sequence and an Abf1p binding site consensus sequence"; /rpt_family="X element Core sequence"; /db_xref="SGD:S000028921"	5875..6344	13	TRUE	130005875	130006344
chr13_ref v2	Transposon	Repeat region	184166..190079	/experiment="experimental evidence, no additional details recorded"; /note="Transposon YMLWTY1-1; Long Terminal Repeat (LTR) retrotransposon of the Copia (Pseudoviridae) group; contains co-transcribed genes TYA Gag and TYB Pol, encoding proteins involved in structure and function of virus-like particles, flanked by two direct repeats YMLWTY1-1"; /rpt_family="Transposon"; /db_xref="SGD:S000007107"	184166..190079	13	FALSE	130184166	130190079
chr13_ref v2	Transposon	Repeat region	196328..202230	/experiment="experimental evidence, no additional details recorded"; /note="Transposon YMLWTY1-2; Long Terminal Repeat (LTR) retrotransposon of the Copia (Pseudoviridae) group; contains co-transcribed genes TYA Gag and TYB Pol, encoding proteins involved in structure and function of virus-like particles, flanked by two direct repeats YMLWTY1-2"; /rpt_family="Transposon"; /db_xref="SGD:S000007108"	196328..202230	13	FALSE	130196328	130202230
chr13_ref v2	Transposon	Repeat region	complement(356999..362912)	/experiment="experimental evidence, no additional details recorded"; /note="Transposon YMRCTY1-3; Long Terminal Repeat (LTR) retrotransposon of the Copia (Pseudoviridae) group; contains co-transcribed genes TYA Gag and TYB Pol, encoding proteins involved in structure and function of virus-like particles, flanked by two direct repeats YMRCTY1-3"; /rpt_family="Transposon"; /db_xref="SGD:S000007119"	356999..362912	13	TRUE	130356999	130362912
chr13_ref v2	Transposon	Repeat region	complement(372691..378616)	/experiment="experimental evidence, no additional details recorded"; /note="Transposon YMRCTY1-4; Long Terminal Repeat (LTR) retrotransposon of the Copia (Pseudoviridae) group; contains co-transcribed genes TYA Gag and TYB Pol, encoding proteins involved in structure and function of virus-like particles, flanked by two direct repeats YMRCTY1-4"; /rpt_family="Transposon"; /db_xref="SGD:S000007120"	372691..378616	13	TRUE	130372691	130378616
chr13_ref v2	X element Core sequence	Repeat region	922620..923045	/gene="TEL13R-XC"; /inference="non-experimental evidence, no additional details recorded"; /note="Telomeric X element Core sequence on the right arm of Chromosome XIII; contains an ARS consensus sequence, an Abf1p binding site consensus sequence, and ORF YMR326C"; /rpt_family="X element Core sequence"; /db_xref="SGD:S000028991"	922620..923045	13	FALSE	130922620	130923045
chr13_ref v2	Telomeric Region	Repeat region	922620..923449	/gene="TEL13R"; /inference="non-experimental evidence, no additional details recorded"; /note="Telomeric region on the right arm of Chromosome XIII, composed of an X element core sequence, X element combinatorial repeats, and a terminal stretch of telomeric repeats"; /rpt_family="Telomeric Region"; /db_xref="SGD:S000028989"	922620..923449	13	FALSE	130922620	130923449
chr13_ref v2	X element Combinatorial Repeats	Repeat region	923046..923324	/gene="TEL13R-XR"; /inference="non-experimental evidence, no additional details recorded"; /note="Telomeric X element combinatorial Repeat region on the right arm of Chromosome XIII; contains repeats of the D, C, B and A types, as well as Tbf1p binding sites; formerly called SubTelomeric Repeats"; /rpt_family="X element Combinatorial Repeats"; /db_xref="SGD:S000028992"	923046..923324	13	FALSE	130923046	130923324
chr13_ref v2	Telomeric Repeat	Repeat region	923325..923449	/gene="TEL13R-TR"; /inference="non-experimental evidence, no additional details recorded"; /note="Terminal stretch of telomeric repeats on the right arm of Chromosome XIII"; /rpt_family="Telomeric Repeat"; /db_xref="SGD:S000028990"	923325..923449	13	FALSE	130923325	130923449
chr14_ref v2	Y' element	Repeat region	complement(1..6617)	/gene="TEL14L-YP"; /inference="non-experimental evidence, no additional details recorded"; /note="Telomeric long Y' element on the left arm of Chromosome XIV; contains an ARS consensus sequence, a region of 36-bp repeats, and three ORFs (YRF1-6/YNL339C, YNL339W-A, YNL339W-B)"; /rpt_family="Y' element"; /db_xref="SGD:S000028928"	1..6617	14	TRUE	140000001	140006617
chr14_ref v2	Telomeric Region	Repeat region	complement(1..7427)	/gene="TEL14L"; /inference="non-experimental evidence, no additional details recorded"; /note="Telomeric region on the left arm of Chromosome XIV, composed of an X element core sequence, X element combinatorial repeats, a short stretch of telomeric repeats, and a long Y' element"; /rpt_family="Telomeric Region"; /db_xref="SGD:S000028924"	1..7427	14	TRUE	140000001	140007427
chr14_ref v2	Telomeric Repeat	Repeat region	complement(6618..6690)	/gene="TEL14L-TR"; /inference="non-experimental evidence, no additional details recorded"; /note="Internal stretch of telomeric repeats spanning ORF YNL338W on the left arm of Chromosome XIV"; /rpt_family="Telomeric Repeat"; /db_xref="SGD:S000028925"	6618..6690	14	TRUE	140006618	140006690
chr14_ref v2	X element Combinatorial Repeats	Repeat region	complement(6691..6962)	/gene="TEL14L-XR"; /inference="non-experimental evidence, no additional details recorded"; /note="Telomeric X element combinatorial Repeat region on the left arm of Chromosome XIV; contains repeats of the D, C, B and A types, as well as Tbf1p binding sites; formerly called SubTelomeric Repeats"; /rpt_family="X element Combinatorial Repeats"; /db_xref="SGD:S000028927"	6691..6962	14	TRUE	140006691	140006962
chr14_ref v2	X element Core sequence	Repeat region	complement(6963..7427)	/gene="TEL14L-XC"; /inference="non-experimental evidence, no additional details recorded"; /note="Telomeric X element Core sequence on the left arm of Chromosome XIV; contains an ARS consensus sequence, an Abf1p binding site consensus sequence, and ORF YNL337W"; /rpt_family="X element Core sequence"; /db_xref="SGD:S000028926"	6963..7427	14	TRUE	140006963	140007427
chr14_ref v2	Transposon	Repeat region	complement(96614..102481)	/experiment="experimental evidence, no additional details recorded"; /note="Transposon YNLCTY1-1; Long Terminal Repeat (LTR) retrotransposon of the Copia (Pseudoviridae) group; contains co-transcribed genes TYA Gag and TYB Pol, encoding proteins involved in structure and function of virus-like particles, flanked by two direct repeats YNLCTY1-1"; /rpt_family="Transposon"; /db_xref="SGD:S000007134"	96614..102481	14	TRUE	140096614	140102481
chr14_ref v2	Transposon	Repeat region	519119..525018	/experiment="experimental evidence, no additional details recorded"; /note="Transposon YNLWTY1-2; Long Terminal Repeat (LTR) retrotransposon of the Copia (Pseudoviridae) group; contains co-transcribed genes TYA Gag and TYB Pol, encoding proteins involved in structure and function of virus-like particles, flanked by two direct repeats YNLWTY1-2"; /rpt_family="Transposon"; /db_xref="SGD:S000007142"	519119..525018	14	FALSE	140519119	140525018
chr14_ref v2	Transposon	Repeat region	complement(562320..567616)	/experiment="experimental evidence, no additional details recorded"; /note="Transposon YNLCTY2-1; Long Terminal Repeat (LTR) retrotransposon of the Copia (Pseudoviridae) group; contains genes TYA Gag and TYB Pol, encoding proteins involved in structure and function of virus-like particles, flanked by two direct repeats; mutated in S288C YNLCTY2-1"; /rpt_family="Transposon"; /db_xref="SGD:S0000071…	562320..567616	14	TRUE	140562320	140567616
chr14_ref v2	X element Core sequence	Repeat region	783235..783697	/gene="TEL14R-XC"; /inference="non-experimental evidence, no additional details recorded"; /note="Telomeric X element Core sequence on the right arm of Chromosome XIV; contains an ARS consensus sequence, an Abf1p binding site consensus sequence, and ORF YNR077C"; /rpt_family="X element Core sequence"; /db_xref="SGD:S000028995"	783235..783697	14	FALSE	140783235	140783697
chr14_ref v2	Telomeric Region	Repeat region	783235..784290	/gene="TEL14R"; /inference="non-experimental evidence, no additional details recorded"; /note="Telomeric region on the right arm of Chromosome XIV, composed of an X element core sequence, X element combinatorial repeats, and a terminal stretch of telomeric repeats"; /rpt_family="Telomeric Region"; /db_xref="SGD:S000028993"	783235..784290	14	FALSE	140783235	140784290
chr14_ref v2	X element Combinatorial Repeats	Repeat region	783698..783994	/gene="TEL14R-XR"; /inference="non-experimental evidence, no additional details recorded"; /note="Telomeric X element combinatorial Repeat region on the right arm of Chromosome XIV; contains repeats of the D, C, B and A types, as well as Tbf1p binding sites; formerly called SubTelomeric Repeats"; /rpt_family="X element Combinatorial Repeats"; /db_xref="SGD:S000028996"	783698..783994	14	FALSE	140783698	140783994
chr14_ref v2	Telomeric Repeat	Repeat region	783995..784290	/gene="TEL14R-TR"; /inference="non-experimental evidence, no additional details recorded"; /note="Terminal stretch of telomeric repeats on the right arm of Chromosome XIV"; /rpt_family="Telomeric Repeat"; /db_xref="SGD:S000028994"	783995..784290	14	FALSE	140783995	140784290
chr15_ref v2	Telomeric Repeat	Repeat region	complement(1..117)	/gene="TEL15L-TR"; /inference="non-experimental evidence, no additional details recorded"; /note="Terminal stretch of telomeric repeats on the left arm of Chromosome XV"; /rpt_family="Telomeric Repeat"; /db_xref="SGD:S000028930"	1..117	15	TRUE	150000001	150000117
chr15_ref v2	Telomeric Region	Repeat region	complement(1..847)	/gene="TEL15L"; /inference="non-experimental evidence, no additional details recorded"; /note="Telomeric region on the left arm of Chromosome XV, composed of an X element core sequence, X element combinatorial repeats, and a terminal stretch of telomeric repeats"; /rpt_family="Telomeric Region"; /db_xref="SGD:S000028929"	1..847	15	TRUE	150000001	150000847
chr15_ref v2	X element Combinatorial Repeats	Repeat region	complement(118..388)	/gene="TEL15L-XR"; /inference="non-experimental evidence, no additional details recorded"; /note="Telomeric X element combinatorial Repeat region on the left arm of Chromosome XV; contains repeats of the D, C, B and A types, as well as Tbf1p binding sites; formerly called SubTelomeric Repeats"; /rpt_family="X element Combinatorial Repeats"; /db_xref="SGD:S000028932"	118..388	15	TRUE	150000118	150000388
chr15_ref v2	X element Core sequence	Repeat region	complement(389..847)	/gene="TEL15L-XC"; /inference="non-experimental evidence, no additional details recorded"; /note="Telomeric X element Core sequence on the left arm of Chromosome XV, contains an ARS consensus sequence, an Abf1p binding site consensus sequence, and ORF YOL166W-A"; /rpt_family="X element Core sequence"; /db_xref="SGD:S000028931"	389..847	15	TRUE	150000389	150000847
chr15_ref v2	Transposon	Repeat region	117703..123628	/experiment="experimental evidence, no additional details recorded"; /note="Transposon YOLWTY1-1; Long Terminal Repeat (LTR) retrotransposon of the Copia (Pseudoviridae) group; contains co-transcribed genes TYA Gag and TYB Pol, encoding proteins involved in structure and function of virus-like particles, flanked by two direct repeats; YOLWTY1-1"; /rpt_family="Transposon"; /db_xref="SGD:S000007161"	117703..123628	15	FALSE	150117703	150123628
chr15_ref v2	Transposon	Repeat region	592862..598775	/experiment="experimental evidence, no additional details recorded"; /note="Transposon YORWTY1-2; Long Terminal Repeat (LTR) retrotransposon of the Copia (Pseudoviridae) group; contains co-transcribed genes TYA Gag and TYB Pol, encoding proteins involved in structure and function of virus-like particles, flanked by two direct repeats; YORWTY1-2"; /rpt_family="Transposon"; /db_xref="SGD:S000007182"	592862..598775	15	FALSE	150592862	150598775
chr15_ref v2	Transposon	Repeat region	complement(702105..708065)	/experiment="experimental evidence, no additional details recorded"; /note="Transposon YORCTY2-1; Long Terminal Repeat (LTR) retrotransposon of the Copia (Pseudoviridae) group; contains co-transcribed genes TYA Gag and TYB Pol, encoding proteins involved in structure and function of virus-like particles, flanked by two direct repeats; YORCTY2-1"; /rpt_family="Transposon"; /db_xref="SGD:S000007168"	702105..708065	15	TRUE	150702105	150708065
chr15_ref v2	Transposon	Repeat region	968327..974285	/experiment="experimental evidence, no additional details recorded"; /note="Transposon YORWTY2-2; Long Terminal Repeat (LTR) retrotransposon of the Copia (Pseudoviridae) group; contains co-transcribed genes TYA Gag and TYB Pol, encoding proteins involved in structure and function of virus-like particles, flanked by two direct repeats; YORWTY2-2"; /rpt_family="Transposon"; /db_xref="SGD:S000007183"	968327..974285	15	FALSE	150968327	150974285
chr15_ref v2	X element Core sequence	Repeat region	1081963..1082408	/gene="TEL15R-XC"; /inference="non-experimental evidence, no additional details recorded"; /note="Telomeric X element Core sequence on the right arm of Chromosome XV, contains an ARS consensus sequence, an Abf1p binding site consensus sequence, and ORF YOR394C-A"; /rpt_family="X element Core sequence"; /db_xref="SGD:S000028999"	1081963..1082408	15	FALSE	151081963	151082408
chr15_ref v2	Telomeric Region	Repeat region	1081963..1089332	/gene="TEL15R"; /inference="non-experimental evidence, no additional details recorded"; /note="Telomeric region on the right arm of Chromosome XV, composed of an X element core sequence, X element combinatorial repeats, a long Y' element, and a very short terminal stretch of telomeric repeats"; /rpt_family="Telomeric Region"; /db_xref="SGD:S000028997"	1081963..1089332	15	FALSE	151081963	151089332
chr15_ref v2	X element Combinatorial Repeats	Repeat region	1082409..1082661	/gene="TEL15R-XR"; /inference="non-experimental evidence, no additional details recorded"; /note="Telomeric X element combinatorial Repeat region on the right arm of Chromosome XV; contains repeats of the D, C, and B types, as well as Tbf1p binding sites; formerly called SubTelomeric Repeats"; /rpt_family="X element Combinatorial Repeats"; /db_xref="SGD:S000029000"	1082409..1082661	15	FALSE	151082409	151082661
chr15_ref v2	Y' element	Repeat region	1082662..1089314	/gene="TEL15R-YP"; /inference="non-experimental evidence, no additional details recorded"; /note="Telomeric long Y' element on the right arm of Chromosome XV; contains an ARS consensus sequence, a region of 36-bp repeats, and ORFs YOR396W and YOR396C-A"; /rpt_family="Y' element"; /db_xref="SGD:S000029001"	1082662..1089314	15	FALSE	151082662	151089314
chr15_ref v2	Telomeric Repeat	Repeat region	1089315..1089332	/gene="TEL15R-TR"; /inference="non-experimental evidence, no additional details recorded"; /note="Terminal stretch of telomeric repeats on the right arm of Chromosome XV"; /rpt_family="Telomeric Repeat"; /db_xref="SGD:S000028998"	1089315..1089332	15	FALSE	151089315	151089332
chr16_ref v2	Y' element	Repeat region	complement(1..6524)	/gene="TEL16L-YP"; /inference="non-experimental evidence, no additional details recorded"; /note="Telomeric long Y' element on the left arm of Chromosome XVI; contains an ARS consensus sequence, a region of 36-bp repeats, and ORFs YRF1-7/YPL283C, YPL283W-A, YPL283W-B"; /rpt_family="Y' element"; /db_xref="SGD:S000028936"	1..6524	16	TRUE	160000001	160006524
chr16_ref v2	Telomeric Region	Repeat region	complement(1..7223)	/gene="TEL16L"; /inference="non-experimental evidence, no additional details recorded"; /note="Telomeric region on the left arm of Chromosome XVI, composed of an X element core sequence, X element combinatorial repeats, and a long Y' element"; /rpt_family="Telomeric Region"; /db_xref="SGD:S000028933"	1..7223	16	TRUE	160000001	160007223
chr16_ref v2	X element Combinatorial Repeats	Repeat region	complement(6525..6777)	/gene="TEL16L-XR"; /inference="non-experimental evidence, no additional details recorded"; /note="Telomeric X element combinatorial Repeat region on the left arm of Chromosome XVI; contains repeats of the D, C and B types; formerly called SubTelomeric Repeats"; /rpt_family="X element Combinatorial Repeats"; /db_xref="SGD:S000028935"	6525..6777	16	TRUE	160006525	160006777
chr16_ref v2	X element Core sequence	Repeat region	complement(6778..7223)	/gene="TEL16L-XC"; /inference="non-experimental evidence, no additional details recorded"; /note="Telomeric X element Core sequence on the left arm of Chromosome XVI, contains an ARS consensus sequence and an Abf1p binding site consensus sequence"; /rpt_family="X element Core sequence"; /db_xref="SGD:S000028934"	6778..7223	16	TRUE	160006778	160007223
chr16_ref v2	Transposon	Repeat region	56452..62375	/experiment="experimental evidence, no additional details recorded"; /note="Transposon YPLWTY1-1; Long Terminal Repeat (LTR) retrotransposon of the Copia (Pseudoviridae) group; contains co-transcribed genes TYA Gag and TYB Pol, encoding proteins involved in structure and function of virus-like particles, flanked by two direct repeats YPLWTY1-1"; /rpt_family="Transposon"; /db_xref="SGD:S000007199"	56452..62375	16	FALSE	160056452	160062375
chr16_ref v2	Transposon	Repeat region	complement(436881..443103)	/experiment="experimental evidence, no additional details recorded"; /note="Transposon YPLCTY4-1; Long Terminal Repeat (LTR) retrotransposon of the Copia (Pseudoviridae) group; contains co-transcribed genes TYA Gag and TYB Pol, encoding proteins involved in structure and function of virus-like particles, flanked by two direct repeats YPLCTY4-1"; /rpt_family="Transposon"; /db_xref="SGD:S000007188"	436881..443103	16	TRUE	160436881	160443103
chr16_ref v2	Transposon	Repeat region	complement(804639..810556)	/experiment="experimental evidence, no additional details recorded"; /note="Transposon YPRCTY1-2; Long Terminal Repeat (LTR) retrotransposon of the Copia (Pseudoviridae) group; contains co-transcribed genes TYA Gag and TYB Pol, encoding proteins involved in structure and function of virus-like particles, flanked by two direct repeats YPRCTY1-2"; /rpt_family="Transposon"; /db_xref="SGD:S000007208"	804639..810556	16	TRUE	160804639	160810556
chr16_ref v2	Transposon	Repeat region	844406..850334	/experiment="experimental evidence, no additional details recorded"; /note="Transposon YPRWTY1-3; Long Terminal Repeat (LTR) retrotransposon of the Copia (Pseudoviridae) group; contains co-transcribed genes TYA Gag and TYB Pol, encoding proteins involved in structure and function of virus-like particles, flanked by two direct repeats YPRWTY1-3"; /rpt_family="Transposon"; /db_xref="SGD:S000007220"	844406..850334	16	FALSE	160844406	160850334
chr16_ref v2	Transposon	Repeat region	complement(850623..856548)	/experiment="experimental evidence, no additional details recorded"; /note="Transposon YPRCTY1-4; Long Terminal Repeat (LTR) retrotransposon of the Copia (Pseudoviridae) group; contains co-transcribed genes TYA Gag and TYB Pol, encoding proteins involved in structure and function of virus-like particles, flanked by two direct repeats YPRCTY1-4"; /rpt_family="Transposon"; /db_xref="SGD:S000007209"	850623..856548	16	TRUE	160850623	160856548
chr16_ref v2	X element Core sequence	Repeat region	942388..942763	/gene="TEL16R-XC"; /inference="non-experimental evidence, no additional details recorded"; /note="Telomeric X element Core sequence on the right arm of Chromosome XVI, contains an ARS consensus sequence and an Abf1p binding site consensus sequence"; /rpt_family="X element Core sequence"; /db_xref="SGD:S000029003"	942388..942763	16	FALSE	160942388	160942763
chr16_ref v2	Telomeric Region	Repeat region	942388..948058	/gene="TEL16R"; /inference="non-experimental evidence, no additional details recorded"; /note="Telomeric region on the right arm of Chromosome XVI, composed of an X element core sequence and a short Y' element"; /rpt_family="Telomeric Region"; /db_xref="SGD:S000029002"	942388..948058	16	FALSE	160942388	160948058
chr16_ref v2	Y' element	Repeat region	942802..948058	/gene="TEL16R-YP"; /inference="non-experimental evidence, no additional details recorded"; /note="Telomeric short Y' element on the right arm of Chromosome XVI; contains an ARS consensus sequence, a region of 36-bp repeats, and four ORFs YPR202W, YPR203W, YPR204W, and YPR204C-A"; /rpt_family="Y' element"; /db_xref="SGD:S000029004"	942802..948058	16	FALSE	160942802	160948058

## Sheet: mapped_features
	#	Sequence	Name	Type	Region	Qualifiers		chromosome	comp?	start_ID	end_ID	Type ID			Type ID	Type	Count
	8	chr1_ref v2	PAU8	Gene	complement(1807..2169)	/gene="PAU8"; /locus_tag="YAL068C"; /db_xref="GeneID:851229"	1807..2169	1	TRUE	10001807	10002169	2			2	Gene	6157
	10	chr1_ref v2	Gene	Gene	2480..2707	/locus_tag="YAL067W-A"; /db_xref="GeneID:1466426"	2480..2707	1	FALSE	10002480	10002707	2			3	LTR	381
	13	chr1_ref v2	SEO1	Gene	complement(7235..9016)	/gene="SEO1"; /locus_tag="YAL067C"; /db_xref="GeneID:851230"	7235..9016	1	TRUE	10007235	10009016	2			9	Repeat region	192
	16	chr1_ref v2	Gene	Gene	complement(11565..11951)	/locus_tag="YAL065C"; /db_xref="GeneID:851232"	11565..11951	1	TRUE	10011565	10011951	2			10	Replication origin	394
	18	chr1_ref v2	Gene	Gene	12046..12426	/locus_tag="YAL064W-B"; /db_xref="GeneID:851233"	12046..12426	1	FALSE	10012046	10012426	2			17	Nucleosome	60098
	20	chr1_ref v2	Gene	Gene	complement(13363..13743)	/locus_tag="YAL064C-A"; /synonym="YAL065C-A"; /db_xref="GeneID:851234"	13363..13743	1	TRUE	10013363	10013743	2
	22	chr1_ref v2	Gene	Gene	21525..21852	/locus_tag="YAL064W"; /db_xref="GeneID:851235"	21525..21852	1	FALSE	10021525	10021852	2
	25	chr1_ref v2	Gene	Gene	complement(22397..22687)	/locus_tag="YAL063C-A"; /db_xref="GeneID:1466427"	22397..22687	1	TRUE	10022397	10022687	2
	27	chr1_ref v2	FLO9	Gene	complement(24001..27680)	/gene="FLO9"; /locus_tag="YAL063C"; /db_xref="GeneID:851236"	24001..27680	1	TRUE	10024001	10027680	2
	30	chr1_ref v2	GDH3	Gene	31279..32652	/gene="GDH3"; /locus_tag="YAL062W"; /synonym="FUN51"; /db_xref="GeneID:851237"	31279..32652	1	FALSE	10031279	10032652	2
	32	chr1_ref v2	BDH2	Gene	33160..34413	/gene="BDH2"; /locus_tag="YAL061W"; /db_xref="GeneID:851238"	33160..34413	1	FALSE	10033160	10034413	2
	34	chr1_ref v2	BDH1	Gene	34867..36015	/gene="BDH1"; /locus_tag="YAL060W"; /db_xref="GeneID:851239"	34867..36015	1	FALSE	10034867	10036015	2
	36	chr1_ref v2	ECM1	Gene	36221..36859	/gene="ECM1"; /locus_tag="YAL059W"; /db_xref="GeneID:851240"	36221..36859	1	FALSE	10036221	10036859	2
	38	chr1_ref v2	CNE1	Gene	37176..38684	/gene="CNE1"; /locus_tag="YAL058W"; /synonym="FUN48"; /db_xref="GeneID:851241"	37176..38684	1	FALSE	10037176	10038684	2
	40	chr1_ref v2	GPB2	Gene	38971..41613	/gene="GPB2"; /locus_tag="YAL056W"; /synonym="KRH1"; /db_xref="GeneID:851243"	38971..41613	1	FALSE	10038971	10041613	2
	43	chr1_ref v2	PEX22	Gene	41889..42431	/gene="PEX22"; /locus_tag="YAL055W"; /synonym="YAF5"; /db_xref="GeneID:851244"	41889..42431	1	FALSE	10041889	10042431	2
	45	chr1_ref v2	ACS1	Gene	complement(42593..44734)	/gene="ACS1"; /locus_tag="YAL054C"; /synonym="FUN44"; /db_xref="GeneID:851245"	42593..44734	1	TRUE	10042593	10044734	2
	47	chr1_ref v2	FLC2	Gene	45611..47962	/gene="FLC2"; /locus_tag="YAL053W"; /db_xref="GeneID:851246"	45611..47962	1	FALSE	10045611	10047962	2
	49	chr1_ref v2	OAF1	Gene	48276..51419	/gene="OAF1"; /locus_tag="YAL051W"; /synonym="YAF1"; /db_xref="GeneID:851247"	48276..51419	1	FALSE	10048276	10051419	2
	51	chr1_ref v2	AIM2	Gene	complement(51567..52307)	/gene="AIM2"; /locus_tag="YAL049C"; /db_xref="GeneID:851248"	51567..52307	1	TRUE	10051567	10052307	2
	53	chr1_ref v2	GEM1	Gene	complement(52513..54501)	/gene="GEM1"; /locus_tag="YAL048C"; /synonym="GON1"; /db_xref="GeneID:851249"	52513..54501	1	TRUE	10052513	10054501	2
	55	chr1_ref v2	SPC72	Gene	complement(54701..56569)	/gene="SPC72"; /locus_tag="YAL047C"; /synonym="LDB4"; /db_xref="GeneID:851250"	54701..56569	1	TRUE	10054701	10056569	2
	57	chr1_ref v2	AIM1	Gene	complement(56741..57097)	/gene="AIM1"; /locus_tag="YAL046C"; /db_xref="GeneID:851251"	56741..57097	1	TRUE	10056741	10057097	2
	59	chr1_ref v2	Gene	Gene	57230..57562	/locus_tag="YAL044W-A"; /db_xref="GeneID:851252"	57230..57562	1	FALSE	10057230	10057562	2
	61	chr1_ref v2	GCV3	Gene	complement(57662..58174)	/gene="GCV3"; /locus_tag="YAL044C"; /db_xref="GeneID:851254"	57662..58174	1	TRUE	10057662	10058174	2
	63	chr1_ref v2	PTA1	Gene	complement(58407..60764)	/gene="PTA1"; /locus_tag="YAL043C"; /synonym="FUN39"; /db_xref="GeneID:851255"	58407..60764	1	TRUE	10058407	10060764	2
	65	chr1_ref v2	ERV46	Gene	61028..62275	/gene="ERV46"; /locus_tag="YAL042W"; /synonym="FUN9"; /db_xref="GeneID:851256"	61028..62275	1	FALSE	10061028	10062275	2
	67	chr1_ref v2	CDC24	Gene	62552..65116	/gene="CDC24"; /locus_tag="YAL041W"; /synonym="CLS4"; /db_xref="GeneID:851190"	62552..65116	1	FALSE	10062552	10065116	2
	69	chr1_ref v2	CLN3	Gene	complement(65490..67232)	/gene="CLN3"; /locus_tag="YAL040C"; /synonym="WHI1, FUN10, DAF1"; /db_xref="GeneID:851191"	65490..67232	1	TRUE	10065490	10067232	2
	71	chr1_ref v2	CYC3	Gene	complement(68428..69237)	/gene="CYC3"; /locus_tag="YAL039C"; /db_xref="GeneID:851192"	68428..69237	1	TRUE	10068428	10069237	2
	74	chr1_ref v2	CDC19	Gene	71498..73000	/gene="CDC19"; /locus_tag="YAL038W"; /synonym="PYK1"; /db_xref="GeneID:851193"	71498..73000	1	FALSE	10071498	10073000	2
	76	chr1_ref v2	Gene	Gene	complement(73138..73230)	/locus_tag="YAL037C-A"; /db_xref="GeneID:1466428"	73138..73230	1	TRUE	10073138	10073230	2
	78	chr1_ref v2	Gene	Gene	73732..74535	/locus_tag="YAL037W"; /db_xref="GeneID:851194"	73732..74535	1	FALSE	10073732	10074535	2
	80	chr1_ref v2	RBG1	Gene	complement(74755..75864)	/gene="RBG1"; /locus_tag="YAL036C"; /synonym="FUN11"; /db_xref="GeneID:851195"	74755..75864	1	TRUE	10074755	10075864	2
	82	chr1_ref v2	FUN12	Gene	76139..79147	/gene="FUN12"; /locus_tag="YAL035W"; /synonym="yIF2"; /db_xref="GeneID:851196"	76139..79147	1	FALSE	10076139	10079147	2
	84	chr1_ref v2	MTW1	Gene	79430..80299	/gene="MTW1"; /locus_tag="YAL034W-A"; /synonym="NSL2, DSN3"; /db_xref="GeneID:851197"	79430..80299	1	FALSE	10079430	10080299	2
	86	chr1_ref v2	FUN19	Gene	complement(80422..81663)	/gene="FUN19"; /locus_tag="YAL034C"; /db_xref="GeneID:851199"	80422..81663	1	TRUE	10080422	10081663	2
	88	chr1_ref v2	POP5	Gene	82418..82939	/gene="POP5"; /locus_tag="YAL033W"; /synonym="FUN53"; /db_xref="GeneID:851200"	82418..82939	1	FALSE	10082418	10082939	2
	90	chr1_ref v2	PRP45	Gene	complement(83047..84186)	/gene="PRP45"; /locus_tag="YAL032C"; /synonym="FUN20"; /db_xref="GeneID:851201"	83047..84186	1	TRUE	10083047	10084186	2
	92	chr1_ref v2	GIP4	Gene	complement(84461..86743)	/gene="GIP4"; /locus_tag="YAL031C"; /synonym="FUN21"; /db_xref="GeneID:851202"	84461..86743	1	TRUE	10084461	10086743	2
	93	chr1_ref v2	SNC1	Gene	86998..87464	/gene="SNC1"; /locus_tag="YAL030W"; /db_xref="GeneID:851203"	86998..87464	1	FALSE	10086998	10087464	2
	97	chr1_ref v2	MYO4	Gene	complement(87567..91982)	/gene="MYO4"; /locus_tag="YAL029C"; /synonym="SHE1, FUN22"; /db_xref="GeneID:851204"	87567..91982	1	TRUE	10087567	10091982	2
	99	chr1_ref v2	FRT2	Gene	92612..94198	/gene="FRT2"; /locus_tag="YAL028W"; /synonym="HPH2"; /db_xref="GeneID:851205"	92612..94198	1	FALSE	10092612	10094198	2
	101	chr1_ref v2	SAW1	Gene	94399..95184	/gene="SAW1"; /locus_tag="YAL027W"; /db_xref="GeneID:851206"	94399..95184	1	FALSE	10094399	10095184	2
	103	chr1_ref v2	DRS2	Gene	complement(95342..99409)	/gene="DRS2"; /locus_tag="YAL026C"; /synonym="SWA3, FUN38"; /db_xref="GeneID:851207"	95342..99409	1	TRUE	10095342	10099409	2
	106	chr1_ref v2	MAK16	Gene	complement(99937..100857)	/gene="MAK16"; /locus_tag="YAL025C"; /db_xref="GeneID:851208"	99937..100857	1	TRUE	10099937	10100857	2
	108	chr1_ref v2	LTE1	Gene	complement(101277..105584)	/gene="LTE1"; /locus_tag="YAL024C"; /synonym="MSI2"; /db_xref="GeneID:851209"	101277..105584	1	TRUE	10101277	10105584	2
	110	chr1_ref v2	PMT2	Gene	complement(105984..108263)	/gene="PMT2"; /locus_tag="YAL023C"; /synonym="FUN25"; /db_xref="GeneID:851210"	105984..108263	1	TRUE	10105984	10108263	2
	112	chr1_ref v2	FUN26	Gene	complement(108589..110142)	/gene="FUN26"; /locus_tag="YAL022C"; /db_xref="GeneID:851211"	108589..110142	1	TRUE	10108589	10110142	2
	114	chr1_ref v2	CCR4	Gene	complement(110558..113071)	/gene="CCR4"; /locus_tag="YAL021C"; /synonym="NUT21, FUN27"; /db_xref="GeneID:851212"	110558..113071	1	TRUE	10110558	10113071	2
	116	chr1_ref v2	ATS1	Gene	complement(113326..114327)	/gene="ATS1"; /locus_tag="YAL020C"; /synonym="KTI13, FUN28"; /db_xref="GeneID:851213"	113326..114327	1	TRUE	10113326	10114327	2
	118	chr1_ref v2	FUN30	Gene	114631..118026	/gene="FUN30"; /locus_tag="YAL019W"; /db_xref="GeneID:851214"	114631..118026	1	FALSE	10114631	10118026	2
	120	chr1_ref v2	Gene	Gene	complement(118276..119253)	/locus_tag="YAL018C"; /db_xref="GeneID:851215"	118276..119253	1	TRUE	10118276	10119253	2
	122	chr1_ref v2	PSK1	Gene	119937..124007	/gene="PSK1"; /locus_tag="YAL017W"; /synonym="FUN31"; /db_xref="GeneID:851216"	119937..124007	1	FALSE	10119937	10124007	2
	125	chr1_ref v2	TPD3	Gene	124591..126498	/gene="TPD3"; /locus_tag="YAL016W"; /synonym="FUN32"; /db_xref="GeneID:851217"	124591..126498	1	FALSE	10124591	10126498	2
	127	chr1_ref v2	NTG1	Gene	complement(126615..127814)	/gene="NTG1"; /locus_tag="YAL015C"; /synonym="SCR1, FUN33"; /db_xref="GeneID:851218"	126615..127814	1	TRUE	10126615	10127814	2
	129	chr1_ref v2	SYN8	Gene	complement(127964..128731)	/gene="SYN8"; /locus_tag="YAL014C"; /synonym="SLT2, UIP2"; /db_xref="GeneID:851219"	127964..128731	1	TRUE	10127964	10128731	2
	131	chr1_ref v2	DEP1	Gene	128982..130242	/gene="DEP1"; /locus_tag="YAL013W"; /synonym="FUN54"; /db_xref="GeneID:851220"	128982..130242	1	FALSE	10128982	10130242	2
	133	chr1_ref v2	CYS3	Gene	130511..131695	/gene="CYS3"; /locus_tag="YAL012W"; /synonym="STR1, FUN35, CYI1"; /db_xref="GeneID:851221"	130511..131695	1	FALSE	10130511	10131695	2
	135	chr1_ref v2	SWC3	Gene	131911..133788	/gene="SWC3"; /locus_tag="YAL011W"; /synonym="SWC1"; /db_xref="GeneID:851222"	131911..133788	1	FALSE	10131911	10133788	2
	137	chr1_ref v2	MDM10	Gene	complement(133896..135377)	/gene="MDM10"; /locus_tag="YAL010C"; /synonym="FUN37"; /db_xref="GeneID:851223"	133896..135377	1	TRUE	10133896	10135377	2
	139	chr1_ref v2	SPO7	Gene	135566..136345	/gene="SPO7"; /locus_tag="YAL009W"; /db_xref="GeneID:851224"	135566..136345	1	FALSE	10135566	10136345	2
	141	chr1_ref v2	FUN14	Gene	136626..137222	/gene="FUN14"; /locus_tag="YAL008W"; /db_xref="GeneID:851225"	136626..137222	1	FALSE	10136626	10137222	2
	143	chr1_ref v2	ERP2	Gene	complement(137410..138057)	/gene="ERP2"; /locus_tag="YAL007C"; /db_xref="GeneID:851226"	137410..138057	1	TRUE	10137410	10138057	2
	145	chr1_ref v2	TRN1	Gene	138864..138966	/gene="TRN1"; /locus_tag="TP(UGG)A"; /db_xref="GeneID:851227"	138864..138966	1	FALSE	10138864	10138966	2
	149	chr1_ref v2	SSA1	Gene	complement(139215..141143)	/gene="SSA1"; /locus_tag="YAL005C"; /synonym="YG100"; /db_xref="GeneID:851259"	139215..141143	1	TRUE	10139215	10141143	2
	150	chr1_ref v2	EFB1	Gene	141886..142872	/gene="EFB1"; /locus_tag="YAL003W"; /synonym="TEF5"; /db_xref="GeneID:851260"	141886..142872	1	FALSE	10141886	10142872	2
	155	chr1_ref v2	VPS8	Gene	143419..147243	/gene="VPS8"; /locus_tag="YAL002W"; /synonym="VPT8, FUN15"; /db_xref="GeneID:851261"	143419..147243	1	FALSE	10143419	10147243	2
	157	chr1_ref v2	TFC3	Gene	complement(147306..150878)	/gene="TFC3"; /locus_tag="YAL001C"; /synonym="TSV115, FUN24"; /db_xref="GeneID:851262"	147306..150878	1	TRUE	10147306	10150878	2
	165	chr1_ref v2	NUP60	Gene	151969..153588	/gene="NUP60"; /locus_tag="YAR002W"; /db_xref="GeneID:851263"	151969..153588	1	FALSE	10151969	10153588	2
	167	chr1_ref v2	ERP1	Gene	complement(153777..154436)	/gene="ERP1"; /locus_tag="YAR002C-A"; /db_xref="GeneID:851264"	153777..154436	1	TRUE	10153777	10154436	2
	169	chr1_ref v2	SWD1	Gene	154717..155997	/gene="SWD1"; /locus_tag="YAR003W"; /synonym="SAF49, CPS50, FUN16"; /db_xref="GeneID:851265"	154717..155997	1	FALSE	10154717	10155997	2
	171	chr1_ref v2	RFA1	Gene	complement(156466..158331)	/gene="RFA1"; /locus_tag="YAR007C"; /synonym="RPA1, FUN3, BUF2"; /db_xref="GeneID:851266"	156466..158331	1	TRUE	10156466	10158331	2
	173	chr1_ref v2	SEN34	Gene	158678..159505	/gene="SEN34"; /locus_tag="YAR008W"; /synonym="FUN4"; /db_xref="GeneID:851267"	158678..159505	1	FALSE	10158678	10159505	2
	179	chr1_ref v2	Gene	Gene	complement(160309..163899)	/locus_tag="YAR009C"; /db_xref="GeneID:851268"	160309..163899	1	TRUE	10160309	10163899	2
	181	chr1_ref v2	Gene	Gene	complement(164256..165578)	/locus_tag="YAR010C"; /db_xref="GeneID:851269"	164256..165578	1	TRUE	10164256	10165578	2
	183	chr1_ref v2	Gene	Gene	165979..166051	/locus_tag="TA(UGC)A"; /db_xref="GeneID:851270"	165979..166051	1	FALSE	10165979	10166051	2
	186	chr1_ref v2	BUD14	Gene	complement(166454..168583)	/gene="BUD14"; /locus_tag="YAR014C"; /db_xref="GeneID:851271"	166454..168583	1	TRUE	10166454	10168583	2
	188	chr1_ref v2	ADE1	Gene	169087..170007	/gene="ADE1"; /locus_tag="YAR015W"; /db_xref="GeneID:851272"	169087..170007	1	FALSE	10169087	10170007	2
	190	chr1_ref v2	KIN3	Gene	complement(170108..171415)	/gene="KIN3"; /locus_tag="YAR018C"; /synonym="NPK1, FUN52"; /db_xref="GeneID:851273"	170108..171415	1	TRUE	10170108	10171415	2
	192	chr1_ref v2	CDC15	Gene	complement(171923..174847)	/gene="CDC15"; /locus_tag="YAR019C"; /synonym="LYT1"; /db_xref="GeneID:851274"	171923..174847	1	TRUE	10171923	10174847	2
	195	chr1_ref v2	PAU7	Gene	complement(176568..176735)	/gene="PAU7"; /locus_tag="YAR020C"; /db_xref="GeneID:851275"	176568..176735	1	TRUE	10176568	10176735	2
	197	chr1_ref v2	Gene	Gene	complement(178993..179532)	/locus_tag="YAR023C"; /db_xref="GeneID:851276"	178993..179532	1	TRUE	10178993	10179532	2
	198	chr1_ref v2	SUP56	Gene	180853..180966	/gene="SUP56"; /locus_tag="TL(CAA)A"; /db_xref="GeneID:851277"	180853..180966	1	FALSE	10180853	10180966	2
	201	chr1_ref v2	Gene	Gene	complement(182234..182315)	/locus_tag="TS(AGA)A"; /db_xref="GeneID:851278"	182234..182315	1	TRUE	10182234	10182315	2
	206	chr1_ref v2	UIP3	Gene	183481..184188	/gene="UIP3"; /locus_tag="YAR027W"; /db_xref="GeneID:851279"	183481..184188	1	FALSE	10183481	10184188	2
	208	chr1_ref v2	Gene	Gene	184603..185307	/locus_tag="YAR028W"; /db_xref="GeneID:851280"	184603..185307	1	FALSE	10184603	10185307	2
	210	chr1_ref v2	Gene	Gene	186032..186256	/locus_tag="YAR029W"; /db_xref="GeneID:851281"	186032..186256	1	FALSE	10186032	10186256	2
	212	chr1_ref v2	PRM9	Gene	186547..187443	/gene="PRM9"; /locus_tag="YAR031W"; /db_xref="GeneID:851282"	186547..187443	1	FALSE	10186547	10187443	2
	214	chr1_ref v2	MST28	Gene	187818..188522	/gene="MST28"; /locus_tag="YAR033W"; /db_xref="GeneID:851284"	187818..188522	1	FALSE	10187818	10188522	2
	217	chr1_ref v2	YAT1	Gene	189904..191967	/gene="YAT1"; /locus_tag="YAR035W"; /db_xref="GeneID:851285"	189904..191967	1	FALSE	10189904	10191967	2
	219	chr1_ref v2	Gene	Gene	complement(192048..192128)	/locus_tag="YAR035C-A"; /db_xref="GeneID:1466430"	192048..192128	1	TRUE	10192048	10192128	2
	221	chr1_ref v2	SWH1	Gene	192330..195896	/gene="SWH1"; /locus_tag="YAR042W"; /synonym="OSH1, YAR044W"; /db_xref="GeneID:851286"	192330..195896	1	FALSE	10192330	10195896	2
	223	chr1_ref v2	FLO1	Gene	199940..204047	/gene="FLO1"; /locus_tag="YAR050W"; /synonym="FLO4, FLO2"; /db_xref="GeneID:851289"	199940..204047	1	FALSE	10199940	10204047	2
	226	chr1_ref v2	Gene	Gene	214129..214332	/locus_tag="YAR061W"; /inference="non-experimental evidence, no additional details recorded"; /pseudo; /db_xref="GeneID:851292"; /db_xref="SGD:S000000087"	214129..214332	1	FALSE	10214129	10214332	2
	227	chr1_ref v2	Gene	Gene	214538..215134	/locus_tag="YAR062W"; /inference="non-experimental evidence, no additional details recorded"; /pseudo; /db_xref="GeneID:851293"; /db_xref="SGD:S000000088"	214538..215134	1	FALSE	10214538	10215134	2
	229	chr1_ref v2	Gene	Gene	216187..216486	/locus_tag="YAR064W"; /db_xref="GeneID:851294"	216187..216486	1	FALSE	10216187	10216486	2
	231	chr1_ref v2	Gene	Gene	217037..217648	/locus_tag="YAR066W"; /db_xref="GeneID:851295"	217037..217648	1	FALSE	10217037	10217648	2
	233	chr1_ref v2	Gene	Gene	218394..218879	/locus_tag="YAR068W"; /db_xref="GeneID:851296"	218394..218879	1	FALSE	10218394	10218879	2
	236	chr1_ref v2	PHO11	Gene	221445..222848	/gene="PHO11"; /locus_tag="YAR071W"; /db_xref="GeneID:851299"	221445..222848	1	FALSE	10221445	10222848	2
	246	chr2_ref v2	Gene	Gene	complement(280..2658)	/locus_tag="YBL113C"; /db_xref="GeneID:852159"	280..2658	2	TRUE	20000280	20002658	2
	248	chr2_ref v2	Gene	Gene	complement(2582..2899)	/locus_tag="YBL112C"; /db_xref="GeneID:852160"	2582..2899	2	TRUE	20002582	20002899	2
	249	chr2_ref v2	Gene	Gene	complement(2907..5009)	/locus_tag="YBL111C"; /db_xref="GeneID:852161"	2907..5009	2	TRUE	20002907	20005009	2
	256	chr2_ref v2	PAU9	Gene	complement(7604..7732)	/gene="PAU9"; /locus_tag="YBL108C-A"; /db_xref="GeneID:852163"	7604..7732	2	TRUE	20007604	20007732	2
	260	chr2_ref v2	Gene	Gene	9581..9664	/locus_tag="TL(UAA)B1"; /db_xref="GeneID:852166"	9581..9664	2	FALSE	20009581	20009664	2
	263	chr2_ref v2	Gene	Gene	complement(9959..10549)	/locus_tag="YBL107C"; /db_xref="GeneID:852167"	9959..10549	2	TRUE	20009959	20010549	2
	265	chr2_ref v2	SRO77	Gene	complement(10845..13877)	/gene="SRO77"; /locus_tag="YBL106C"; /synonym="SNI2, SOP2"; /db_xref="GeneID:852168"	10845..13877	2	TRUE	20010845	20013877	2
	267	chr2_ref v2	PKC1	Gene	complement(14239..17694)	/gene="PKC1"; /locus_tag="YBL105C"; /synonym="STT1, HPO2, CLY15"; /db_xref="GeneID:852169"	14239..17694	2	TRUE	20014239	20017694	2
	269	chr2_ref v2	Gene	Gene	complement(18175..21291)	/locus_tag="YBL104C"; /synonym="YBL103C-A"; /db_xref="GeneID:852170"	18175..21291	2	TRUE	20018175	20021291	2
	271	chr2_ref v2	RTG3	Gene	complement(22074..23534)	/gene="RTG3"; /locus_tag="YBL103C"; /db_xref="GeneID:852171"	22074..23534	2	TRUE	20022074	20023534	2
	273	chr2_ref v2	SFT2	Gene	24096..24743	/gene="SFT2"; /locus_tag="YBL102W"; /db_xref="GeneID:852172"	24096..24743	2	FALSE	20024096	20024743	2
	275	chr2_ref v2	ECM21	Gene	complement(24944..28297)	/gene="ECM21"; /locus_tag="YBL101C"; /db_xref="GeneID:852173"	24944..28297	2	TRUE	20024944	20028297	2
	277	chr2_ref v2	Gene	Gene	28425..28544	/locus_tag="YBL100W-C"; /synonym="YBL101W-C"; /db_xref="GeneID:1466439"	28425..28544	2	FALSE	20028425	20028544	2
	282	chr2_ref v2	Gene	Gene	29933..31249	/locus_tag="YBL100W-A"; /db_xref="GeneID:852174"	29933..31249	2	FALSE	20029933	20031249	2
	283	chr2_ref v2	Gene	Gene	29933..35246	/locus_tag="YBL100W-B"; /db_xref="GeneID:852175"	29933..35246	2	FALSE	20029933	20035246	2
	289	chr2_ref v2	Gene	Gene	36396..36486	/locus_tag="TF(GAA)B"; /db_xref="GeneID:852176"	36396..36486	2	FALSE	20036396	20036486	2
	293	chr2_ref v2	ATP1	Gene	37051..38688	/gene="ATP1"; /locus_tag="YBL099W"; /db_xref="GeneID:852177"	37051..38688	2	FALSE	20037051	20038688	2
	296	chr2_ref v2	BNA4	Gene	39143..40525	/gene="BNA4"; /locus_tag="YBL098W"; /db_xref="GeneID:852179"	39143..40525	2	FALSE	20039143	20040525	2
	298	chr2_ref v2	BRN1	Gene	40829..43093	/gene="BRN1"; /locus_tag="YBL097W"; /db_xref="GeneID:852180"	40829..43093	2	FALSE	20040829	20043093	2
	300	chr2_ref v2	Gene	Gene	43275..44087	/locus_tag="YBL095W"; /db_xref="GeneID:852181"	43275..44087	2	FALSE	20043275	20044087	2
	302	chr2_ref v2	ROX3	Gene	complement(44254..44916)	/gene="ROX3"; /locus_tag="YBL093C"; /synonym="MED19, SSN7, NUT3"; /db_xref="GeneID:852184"	44254..44916	2	TRUE	20044254	20044916	2
	304	chr2_ref v2	RPL32	Gene	45976..46368	/gene="RPL32"; /locus_tag="YBL092W"; /db_xref="GeneID:852185"	45976..46368	2	FALSE	20045976	20046368	2
	305	chr2_ref v2	SCS22	Gene	complement(46563..47178)	/gene="SCS22"; /locus_tag="YBL091C-A"; /db_xref="GeneID:852186"	46563..47178	2	TRUE	20046563	20047178	2
	309	chr2_ref v2	MAP2	Gene	complement(47361..48626)	/gene="MAP2"; /locus_tag="YBL091C"; /db_xref="GeneID:852187"	47361..48626	2	TRUE	20047361	20048626	2
	311	chr2_ref v2	MRP21	Gene	48823..49356	/gene="MRP21"; /locus_tag="YBL090W"; /synonym="MRP50"; /db_xref="GeneID:852188"	48823..49356	2	FALSE	20048823	20049356	2
	313	chr2_ref v2	AVT5	Gene	49572..50951	/gene="AVT5"; /locus_tag="YBL089W"; /db_xref="GeneID:852189"	49572..50951	2	FALSE	20049572	20050951	2
	315	chr2_ref v2	TEL1	Gene	complement(51017..59380)	/gene="TEL1"; /locus_tag="YBL088C"; /db_xref="GeneID:852190"	51017..59380	2	TRUE	20051017	20059380	2
	316	chr2_ref v2	RPL23A	Gene	complement(59820..60737)	/gene="RPL23A"; /locus_tag="YBL087C"; /db_xref="GeneID:852191"	59820..60737	2	TRUE	20059820	20060737	2
	320	chr2_ref v2	Gene	Gene	complement(61200..62600)	/locus_tag="YBL086C"; /db_xref="GeneID:852192"	61200..62600	2	TRUE	20061200	20062600	2
	323	chr2_ref v2	BOI1	Gene	63874..66816	/gene="BOI1"; /locus_tag="YBL085W"; /synonym="BOB1, GIN7"; /db_xref="GeneID:852193"	63874..66816	2	FALSE	20063874	20066816	2
	325	chr2_ref v2	CDC27	Gene	complement(67168..69444)	/gene="CDC27"; /locus_tag="YBL084C"; /synonym="SNB1, APC3"; /db_xref="GeneID:852194"	67168..69444	2	TRUE	20067168	20069444	2
	327	chr2_ref v2	ALG3	Gene	complement(69750..71126)	/gene="ALG3"; /locus_tag="YBL082C"; /synonym="RHK1"; /db_xref="GeneID:852196"	69750..71126	2	TRUE	20069750	20071126	2
	329	chr2_ref v2	Gene	Gene	71861..72967	/locus_tag="YBL081W"; /db_xref="GeneID:852197"	71861..72967	2	FALSE	20071861	20072967	2
	331	chr2_ref v2	PET112	Gene	complement(73065..74690)	/gene="PET112"; /locus_tag="YBL080C"; /db_xref="GeneID:852198"	73065..74690	2	TRUE	20073065	20074690	2
	333	chr2_ref v2	NUP170	Gene	75255..79763	/gene="NUP170"; /locus_tag="YBL079W"; /synonym="NLE3"; /db_xref="GeneID:852199"	75255..79763	2	FALSE	20075255	20079763	2
	335	chr2_ref v2	ATG8	Gene	complement(80375..80728)	/gene="ATG8"; /locus_tag="YBL078C"; /synonym="AUT7, CVT5, APG8"; /db_xref="GeneID:852200"	80375..80728	2	TRUE	20080375	20080728	2
	337	chr2_ref v2	ILS1	Gene	complement(81040..84258)	/gene="ILS1"; /locus_tag="YBL076C"; /db_xref="GeneID:852202"	81040..84258	2	TRUE	20081040	20084258	2
	339	chr2_ref v2	SSA3	Gene	complement(84496..86445)	/gene="SSA3"; /locus_tag="YBL075C"; /synonym="YG106"; /db_xref="GeneID:852203"	84496..86445	2	TRUE	20084496	20086445	2
	341	chr2_ref v2	AAR2	Gene	complement(86719..87786)	/gene="AAR2"; /locus_tag="YBL074C"; /db_xref="GeneID:852205"	86719..87786	2	TRUE	20086719	20087786	2
	344	chr2_ref v2	RPS8A	Gene	complement(88514..89116)	/gene="RPS8A"; /locus_tag="YBL072C"; /db_xref="GeneID:852206"	88514..89116	2	TRUE	20088514	20089116	2
	346	chr2_ref v2	Gene	Gene	complement(89448..89546)	/locus_tag="YBL071C-B"; /db_xref="GeneID:1466440"	89448..89546	2	TRUE	20089448	20089546	2
	348	chr2_ref v2	KTI11	Gene	89968..90216	/gene="KTI11"; /locus_tag="YBL071W-A"; /synonym="DPH3"; /db_xref="GeneID:852207"	89968..90216	2	FALSE	20089968	20090216	2
	350	chr2_ref v2	AST1	Gene	90732..92021	/gene="AST1"; /locus_tag="YBL069W"; /db_xref="GeneID:852209"	90732..92021	2	FALSE	20090732	20092021	2
	352	chr2_ref v2	PRS4	Gene	92406..93386	/gene="PRS4"; /locus_tag="YBL068W"; /db_xref="GeneID:852211"	92406..93386	2	FALSE	20092406	20093386	2
	355	chr2_ref v2	UBP13	Gene	complement(93631..95874)	/gene="UBP13"; /locus_tag="YBL067C"; /db_xref="GeneID:852212"	93631..95874	2	TRUE	20093631	20095874	2
	357	chr2_ref v2	SEF1	Gene	complement(96661..100107)	/gene="SEF1"; /locus_tag="YBL066C"; /db_xref="GeneID:852214"	96661..100107	2	TRUE	20096661	20100107	2
	359	chr2_ref v2	PRX1	Gene	complement(100363..101148)	/gene="PRX1"; /locus_tag="YBL064C"; /db_xref="GeneID:852215"	100363..101148	2	TRUE	20100363	20101148	2
	361	chr2_ref v2	KIP1	Gene	101878..105213	/gene="KIP1"; /locus_tag="YBL063W"; /synonym="CIN9"; /db_xref="GeneID:852216"	101878..105213	2	FALSE	20101878	20105213	2
	363	chr2_ref v2	SKT5	Gene	complement(105308..107398)	/gene="SKT5"; /locus_tag="YBL061C"; /synonym="CSD4, CHS4, CAL2"; /db_xref="GeneID:852218"	105308..107398	2	TRUE	20105308	20107398	2
	365	chr2_ref v2	YEL1	Gene	107924..109987	/gene="YEL1"; /locus_tag="YBL060W"; /db_xref="GeneID:852219"	107924..109987	2	FALSE	20107924	20109987	2
	366	chr2_ref v2	Gene	Gene	complement(110117..110531)	/locus_tag="YBL059C-A"; /db_xref="GeneID:852220"	110117..110531	2	TRUE	20110117	20110531	2
	369	chr2_ref v2	Gene	Gene	110586..111236	/locus_tag="YBL059W"; /db_xref="GeneID:852221"	110586..111236	2	FALSE	20110586	20111236	2
	373	chr2_ref v2	SHP1	Gene	111429..112700	/gene="SHP1"; /locus_tag="YBL058W"; /synonym="UBX1"; /db_xref="GeneID:852222"	111429..112700	2	FALSE	20111429	20112700	2
	375	chr2_ref v2	PTH2	Gene	complement(112793..113436)	/gene="PTH2"; /locus_tag="YBL057C"; /db_xref="GeneID:852223"	112793..113436	2	TRUE	20112793	20113436	2
	377	chr2_ref v2	PTC3	Gene	113754..115160	/gene="PTC3"; /locus_tag="YBL056W"; /db_xref="GeneID:852224"	113754..115160	2	FALSE	20113754	20115160	2
	379	chr2_ref v2	Gene	Gene	complement(115565..116821)	/locus_tag="YBL055C"; /db_xref="GeneID:852225"	115565..116821	2	TRUE	20115565	20116821	2
	381	chr2_ref v2	Gene	Gene	117579..119156	/locus_tag="YBL054W"; /db_xref="GeneID:852226"	117579..119156	2	FALSE	20117579	20119156	2
	383	chr2_ref v2	SAS3	Gene	complement(119369..121867)	/gene="SAS3"; /locus_tag="YBL052C"; /db_xref="GeneID:852228"	119369..121867	2	TRUE	20119369	20121867	2
	386	chr2_ref v2	PIN4	Gene	complement(122744..124750)	/gene="PIN4"; /locus_tag="YBL051C"; /synonym="MDT1"; /db_xref="GeneID:852229"	122744..124750	2	TRUE	20122744	20124750	2
	387	chr2_ref v2	SEC17	Gene	125116..126110	/gene="SEC17"; /locus_tag="YBL050W"; /synonym="RNS3"; /db_xref="GeneID:852230"	125116..126110	2	FALSE	20125116	20126110	2
	391	chr2_ref v2	MOH1	Gene	126819..127235	/gene="MOH1"; /locus_tag="YBL049W"; /db_xref="GeneID:852231"	126819..127235	2	FALSE	20126819	20127235	2
	393	chr2_ref v2	EDE1	Gene	complement(127885..132030)	/gene="EDE1"; /locus_tag="YBL047C"; /synonym="BUD15"; /db_xref="GeneID:852233"	127885..132030	2	TRUE	20127885	20132030	2
	395	chr2_ref v2	PSY4	Gene	132414..133739	/gene="PSY4"; /locus_tag="YBL046W"; /db_xref="GeneID:852234"	132414..133739	2	FALSE	20132414	20133739	2
	397	chr2_ref v2	COR1	Gene	complement(134134..135507)	/gene="COR1"; /locus_tag="YBL045C"; /synonym="QCR1"; /db_xref="GeneID:852235"	134134..135507	2	TRUE	20134134	20135507	2
	399	chr2_ref v2	Gene	Gene	135989..136359	/locus_tag="YBL044W"; /db_xref="GeneID:852236"	135989..136359	2	FALSE	20135989	20136359	2
	401	chr2_ref v2	ECM13	Gene	136679..137452	/gene="ECM13"; /locus_tag="YBL043W"; /db_xref="GeneID:852237"	136679..137452	2	FALSE	20136679	20137452	2
	403	chr2_ref v2	FUI1	Gene	complement(138332..140251)	/gene="FUI1"; /locus_tag="YBL042C"; /db_xref="GeneID:852238"	138332..140251	2	TRUE	20138332	20140251	2
	405	chr2_ref v2	PRE7	Gene	141238..141963	/gene="PRE7"; /locus_tag="YBL041W"; /synonym="PRS3"; /db_xref="GeneID:852239"	141238..141963	2	FALSE	20141238	20141963	2
	406	chr2_ref v2	ERD2	Gene	complement(142103..142859)	/gene="ERD2"; /locus_tag="YBL040C"; /db_xref="GeneID:852240"	142103..142859	2	TRUE	20142103	20142859	2
	410	chr2_ref v2	Gene	Gene	143384..143563	/locus_tag="YBL039W-B"; /synonym="YBL039W-A"; /db_xref="GeneID:1466441"	143384..143563	2	FALSE	20143384	20143563	2
	413	chr2_ref v2	URA7	Gene	complement(143980..145719)	/gene="URA7"; /locus_tag="YBL039C"; /db_xref="GeneID:852241"	143980..145719	2	TRUE	20143980	20145719	2
	415	chr2_ref v2	MRPL16	Gene	146178..146876	/gene="MRPL16"; /locus_tag="YBL038W"; /db_xref="GeneID:852242"	146178..146876	2	FALSE	20146178	20146876	2
	417	chr2_ref v2	APL3	Gene	147200..150277	/gene="APL3"; /locus_tag="YBL037W"; /db_xref="GeneID:852243"	147200..150277	2	FALSE	20147200	20150277	2
	419	chr2_ref v2	Gene	Gene	complement(150438..151211)	/locus_tag="YBL036C"; /db_xref="GeneID:852244"	150438..151211	2	TRUE	20150438	20151211	2
	421	chr2_ref v2	POL12	Gene	complement(151484..153601)	/gene="POL12"; /locus_tag="YBL035C"; /db_xref="GeneID:852245"	151484..153601	2	TRUE	20151484	20153601	2
	423	chr2_ref v2	STU1	Gene	complement(153839..158380)	/gene="STU1"; /locus_tag="YBL034C"; /db_xref="GeneID:852246"	153839..158380	2	TRUE	20153839	20158380	2
	425	chr2_ref v2	RIB1	Gene	complement(158647..159684)	/gene="RIB1"; /locus_tag="YBL033C"; /db_xref="GeneID:852247"	158647..159684	2	TRUE	20158647	20159684	2
	427	chr2_ref v2	HEK2	Gene	160175..161320	/gene="HEK2"; /locus_tag="YBL032W"; /synonym="KHD1"; /db_xref="GeneID:852248"	160175..161320	2	FALSE	20160175	20161320	2
	429	chr2_ref v2	SHE1	Gene	161690..162706	/gene="SHE1"; /locus_tag="YBL031W"; /db_xref="GeneID:852249"	161690..162706	2	FALSE	20161690	20162706	2
	431	chr2_ref v2	PET9	Gene	complement(163032..163988)	/gene="PET9"; /locus_tag="YBL030C"; /synonym="ANC2, AAC2"; /db_xref="GeneID:852250"	163032..163988	2	TRUE	20163032	20163988	2
	433	chr2_ref v2	Gene	Gene	complement(164479..164763)	/locus_tag="YBL029C-A"; /db_xref="GeneID:852251"	164479..164763	2	TRUE	20164479	20164763	2
	435	chr2_ref v2	Gene	Gene	166125..167255	/locus_tag="YBL029W"; /db_xref="GeneID:852252"	166125..167255	2	FALSE	20166125	20167255	2
	437	chr2_ref v2	Gene	Gene	complement(167509..167829)	/locus_tag="YBL028C"; /db_xref="GeneID:852253"	167509..167829	2	TRUE	20167509	20167829	2
	438	chr2_ref v2	RPL19B	Gene	168414..169367	/gene="RPL19B"; /locus_tag="YBL027W"; /db_xref="GeneID:852254"	168414..169367	2	FALSE	20168414	20169367	2
	442	chr2_ref v2	LSM2	Gene	170614..171029	/gene="LSM2"; /locus_tag="YBL026W"; /synonym="SNP3, SMX5"; /db_xref="GeneID:852255"	170614..171029	2	FALSE	20170614	20171029	2
	446	chr2_ref v2	RRN10	Gene	171472..171909	/gene="RRN10"; /locus_tag="YBL025W"; /db_xref="GeneID:852256"	171472..171909	2	FALSE	20171472	20171909	2
	448	chr2_ref v2	NCL1	Gene	172525..174579	/gene="NCL1"; /locus_tag="YBL024W"; /synonym="TRM4"; /db_xref="GeneID:852257"	172525..174579	2	FALSE	20172525	20174579	2
	450	chr2_ref v2	MCM2	Gene	complement(174911..177517)	/gene="MCM2"; /locus_tag="YBL023C"; /db_xref="GeneID:852258"	174911..177517	2	TRUE	20174911	20177517	2
	453	chr2_ref v2	PIM1	Gene	complement(177865..181266)	/gene="PIM1"; /locus_tag="YBL022C"; /synonym="LON1"; /db_xref="GeneID:852259"	177865..181266	2	TRUE	20177865	20181266	2
	455	chr2_ref v2	HAP3	Gene	complement(181651..182085)	/gene="HAP3"; /locus_tag="YBL021C"; /db_xref="GeneID:852260"	181651..182085	2	TRUE	20181651	20182085	2
	457	chr2_ref v2	RFT1	Gene	182392..184116	/gene="RFT1"; /locus_tag="YBL020W"; /db_xref="GeneID:852261"	182392..184116	2	FALSE	20182392	20184116	2
	459	chr2_ref v2	APN2	Gene	184344..185906	/gene="APN2"; /locus_tag="YBL019W"; /synonym="ETH1"; /db_xref="GeneID:852262"	184344..185906	2	FALSE	20184344	20185906	2
	460	chr2_ref v2	POP8	Gene	complement(185989..186465)	/gene="POP8"; /locus_tag="YBL018C"; /db_xref="GeneID:852263"	185989..186465	2	TRUE	20185989	20186465	2
	464	chr2_ref v2	PEP1	Gene	complement(186835..191574)	/gene="PEP1"; /locus_tag="YBL017C"; /synonym="VPT1, VPS10"; /db_xref="GeneID:852264"	186835..191574	2	TRUE	20186835	20191574	2
	466	chr2_ref v2	FUS3	Gene	192442..193503	/gene="FUS3"; /locus_tag="YBL016W"; /synonym="DAC2"; /db_xref="GeneID:852265"	192442..193503	2	FALSE	20192442	20193503	2
	468	chr2_ref v2	ACH1	Gene	194113..195693	/gene="ACH1"; /locus_tag="YBL015W"; /db_xref="GeneID:852266"	194113..195693	2	FALSE	20194113	20195693	2
	470	chr2_ref v2	Gene	Gene	197485..197558	/locus_tag="TI(AAU)B"; /db_xref="GeneID:852267"	197485..197558	2	FALSE	20197485	20197558	2
	472	chr2_ref v2	Gene	Gene	complement(197620..197690)	/locus_tag="TG(GCC)B"; /db_xref="GeneID:852268"	197620..197690	2	TRUE	20197620	20197690	2
	477	chr2_ref v2	RRN6	Gene	complement(199055..201739)	/gene="RRN6"; /locus_tag="YBL014C"; /db_xref="GeneID:852269"	199055..201739	2	TRUE	20199055	20201739	2
	479	chr2_ref v2	FMT1	Gene	202047..203252	/gene="FMT1"; /locus_tag="YBL013W"; /db_xref="GeneID:852270"	202047..203252	2	FALSE	20202047	20203252	2
	481	chr2_ref v2	SCT1	Gene	203529..205808	/gene="SCT1"; /locus_tag="YBL011W"; /synonym="GAT2"; /db_xref="GeneID:852271"	203529..205808	2	FALSE	20203529	20205808	2
	483	chr2_ref v2	Gene	Gene	complement(206098..206940)	/locus_tag="YBL010C"; /db_xref="GeneID:852273"	206098..206940	2	TRUE	20206098	20206940	2
	485	chr2_ref v2	ALK2	Gene	207185..209215	/gene="ALK2"; /locus_tag="YBL009W"; /db_xref="GeneID:852274"	207185..209215	2	FALSE	20207185	20209215	2
	487	chr2_ref v2	Gene	Gene	209400..209639	/locus_tag="YBL008W-A"; /db_xref="GeneID:1466442"	209400..209639	2	FALSE	20209400	20209639	2
	490	chr2_ref v2	HIR1	Gene	209644..212166	/gene="HIR1"; /locus_tag="YBL008W"; /db_xref="GeneID:852275"	209644..212166	2	FALSE	20209644	20212166	2
	492	chr2_ref v2	SLA1	Gene	complement(212623..216357)	/gene="SLA1"; /locus_tag="YBL007C"; /db_xref="GeneID:852276"	212623..216357	2	TRUE	20212623	20216357	2
	494	chr2_ref v2	LDB7	Gene	complement(216578..217120)	/gene="LDB7"; /locus_tag="YBL006C"; /synonym="RSC14"; /db_xref="GeneID:852277"	216578..217120	2	TRUE	20216578	20217120	2
	496	chr2_ref v2	PDR3	Gene	217461..220391	/gene="PDR3"; /locus_tag="YBL005W"; /synonym="TPE2, AMY2"; /db_xref="GeneID:852278"	217461..220391	2	FALSE	20217461	20220391	2
	501	chr2_ref v2	Gene	Gene	221321..222633	/locus_tag="YBL005W-A"; /db_xref="GeneID:852279"	221321..222633	2	FALSE	20221321	20222633	2
	502	chr2_ref v2	Gene	Gene	221321..226579	/locus_tag="YBL005W-B"; /db_xref="GeneID:852280"	221321..226579	2	FALSE	20221321	20226579	2
	506	chr2_ref v2	Gene	Gene	227056..227137	/locus_tag="TS(AGA)B"; /db_xref="GeneID:852281"	227056..227137	2	FALSE	20227056	20227137	2
	509	chr2_ref v2	UTP20	Gene	227617..235098	/gene="UTP20"; /locus_tag="YBL004W"; /db_xref="GeneID:852282"	227617..235098	2	FALSE	20227617	20235098	2
	511	chr2_ref v2	HTA2	Gene	complement(235375..235773)	/gene="HTA2"; /locus_tag="YBL003C"; /synonym="H2A2"; /db_xref="GeneID:852283"	235375..235773	2	TRUE	20235375	20235773	2
	513	chr2_ref v2	HTB2	Gene	236473..236868	/gene="HTB2"; /locus_tag="YBL002W"; /db_xref="GeneID:852284"	236473..236868	2	FALSE	20236473	20236868	2
	515	chr2_ref v2	ECM15	Gene	complement(237134..237448)	/gene="ECM15"; /locus_tag="YBL001C"; /db_xref="GeneID:852285"	237134..237448	2	TRUE	20237134	20237448	2
	522	chr2_ref v2	NTH2	Gene	complement(238922..241264)	/gene="NTH2"; /locus_tag="YBR001C"; /db_xref="GeneID:852286"	238922..241264	2	TRUE	20238922	20241264	2
	524	chr2_ref v2	RER2	Gene	complement(241689..242549)	/gene="RER2"; /locus_tag="YBR002C"; /db_xref="GeneID:852287"	241689..242549	2	TRUE	20241689	20242549	2
	526	chr2_ref v2	COQ1	Gene	242790..244211	/gene="COQ1"; /locus_tag="YBR003W"; /db_xref="GeneID:852288"	242790..244211	2	FALSE	20242790	20244211	2
	528	chr2_ref v2	GPI18	Gene	complement(244347..245648)	/gene="GPI18"; /locus_tag="YBR004C"; /db_xref="GeneID:852289"	244347..245648	2	TRUE	20244347	20245648	2
	530	chr2_ref v2	RCR1	Gene	245887..246528	/gene="RCR1"; /locus_tag="YBR005W"; /db_xref="GeneID:852290"	245887..246528	2	FALSE	20245887	20246528	2
	532	chr2_ref v2	UGA2	Gene	246991..248484	/gene="UGA2"; /locus_tag="YBR006W"; /synonym="UGA5"; /db_xref="GeneID:852291"	246991..248484	2	FALSE	20246991	20248484	2
	534	chr2_ref v2	DSF2	Gene	complement(248787..250997)	/gene="DSF2"; /locus_tag="YBR007C"; /db_xref="GeneID:852292"	248787..250997	2	TRUE	20248787	20250997	2
	536	chr2_ref v2	FLR1	Gene	complement(252544..254190)	/gene="FLR1"; /locus_tag="YBR008C"; /db_xref="GeneID:852293"	252544..254190	2	TRUE	20252544	20254190	2
	539	chr2_ref v2	HHF1	Gene	complement(255354..255665)	/gene="HHF1"; /locus_tag="YBR009C"; /db_xref="GeneID:852294"	255354..255665	2	TRUE	20255354	20255665	2
	541	chr2_ref v2	HHT1	Gene	256312..256722	/gene="HHT1"; /locus_tag="YBR010W"; /synonym="SIN2, BUR5"; /db_xref="GeneID:852295"	256312..256722	2	FALSE	20256312	20256722	2
	543	chr2_ref v2	IPP1	Gene	complement(257093..257956)	/gene="IPP1"; /locus_tag="YBR011C"; /synonym="PPA1"; /db_xref="GeneID:852296"	257093..257956	2	TRUE	20257093	20257956	2
	548	chr2_ref v2	Gene	Gene	259850..261172	/locus_tag="YBR012W-A"; /db_xref="GeneID:852298"	259850..261172	2	FALSE	20259850	20261172	2
	549	chr2_ref v2	Gene	Gene	259850..265119	/locus_tag="YBR012W-B"; /db_xref="GeneID:852299"	259850..265119	2	FALSE	20259850	20265119	2
	554	chr2_ref v2	Gene	Gene	complement(265471..265860)	/locus_tag="YBR013C"; /db_xref="GeneID:852300"	265471..265860	2	TRUE	20265471	20265860	2
	556	chr2_ref v2	Gene	Gene	266357..266429	/locus_tag="TT(AGU)B"; /db_xref="GeneID:852301"	266357..266429	2	FALSE	20266357	20266429	2
	559	chr2_ref v2	GRX7	Gene	complement(266704..267315)	/gene="GRX7"; /locus_tag="YBR014C"; /db_xref="GeneID:852302"	266704..267315	2	TRUE	20266704	20267315	2
	561	chr2_ref v2	MNN2	Gene	complement(267689..269482)	/gene="MNN2"; /locus_tag="YBR015C"; /synonym="LDB8, CRV4, TTP1"; /db_xref="GeneID:852303"	267689..269482	2	TRUE	20267689	20269482	2
	563	chr2_ref v2	Gene	Gene	270226..270612	/locus_tag="YBR016W"; /db_xref="GeneID:852304"	270226..270612	2	FALSE	20270226	20270612	2
	565	chr2_ref v2	KAP104	Gene	complement(270926..273682)	/gene="KAP104"; /locus_tag="YBR017C"; /db_xref="GeneID:852305"	270926..273682	2	TRUE	20270926	20273682	2
	567	chr2_ref v2	GAL7	Gene	complement(274406..275506)	/gene="GAL7"; /locus_tag="YBR018C"; /db_xref="GeneID:852306"	274406..275506	2	TRUE	20274406	20275506	2
	569	chr2_ref v2	GAL10	Gene	complement(276232..278331)	/gene="GAL10"; /locus_tag="YBR019C"; /db_xref="GeneID:852307"	276232..278331	2	TRUE	20276232	20278331	2
	571	chr2_ref v2	GAL1	Gene	279000..280586	/gene="GAL1"; /locus_tag="YBR020W"; /db_xref="GeneID:852308"	279000..280586	2	FALSE	20279000	20280586	2
	573	chr2_ref v2	FUR4	Gene	281422..283323	/gene="FUR4"; /locus_tag="YBR021W"; /db_xref="GeneID:852309"	281422..283323	2	FALSE	20281422	20283323	2
	576	chr2_ref v2	POA1	Gene	283717..284250	/gene="POA1"; /locus_tag="YBR022W"; /db_xref="GeneID:852310"	283717..284250	2	FALSE	20283717	20284250	2
	578	chr2_ref v2	CHS3	Gene	complement(284407..287904)	/gene="CHS3"; /locus_tag="YBR023C"; /synonym="KTI2, DIT101, CSD2, CAL1"; /db_xref="GeneID:852311"	284407..287904	2	TRUE	20284407	20287904	2
	580	chr2_ref v2	SCO2	Gene	289424..290329	/gene="SCO2"; /locus_tag="YBR024W"; /db_xref="GeneID:852312"	289424..290329	2	FALSE	20289424	20290329	2
	582	chr2_ref v2	OLA1	Gene	complement(290660..291844)	/gene="OLA1"; /locus_tag="YBR025C"; /db_xref="GeneID:852313"	290660..291844	2	TRUE	20290660	20291844	2
	584	chr2_ref v2	ETR1	Gene	complement(292856..293998)	/gene="ETR1"; /locus_tag="YBR026C"; /synonym="MRF1', MRF1"; /db_xref="GeneID:852314"	292856..293998	2	TRUE	20292856	20293998	2
	586	chr2_ref v2	Gene	Gene	complement(294404..295981)	/locus_tag="YBR028C"; /db_xref="GeneID:852316"	294404..295981	2	TRUE	20294404	20295981	2
	588	chr2_ref v2	CDS1	Gene	complement(296348..297721)	/gene="CDS1"; /locus_tag="YBR029C"; /synonym="CDG1"; /db_xref="GeneID:852317"	296348..297721	2	TRUE	20296348	20297721	2
	590	chr2_ref v2	Gene	Gene	298271..299929	/locus_tag="YBR030W"; /db_xref="GeneID:852318"	298271..299929	2	FALSE	20298271	20299929	2
	592	chr2_ref v2	RPL4A	Gene	300145..301233	/gene="RPL4A"; /locus_tag="YBR031W"; /db_xref="GeneID:852319"	300145..301233	2	FALSE	20300145	20301233	2
	594	chr2_ref v2	EDS1	Gene	301923..304682	/gene="EDS1"; /locus_tag="YBR033W"; /db_xref="GeneID:852321"	301923..304682	2	FALSE	20301923	20304682	2
	596	chr2_ref v2	HMT1	Gene	complement(304909..305955)	/gene="HMT1"; /locus_tag="YBR034C"; /synonym="RMT1, ODP1, HCP1"; /db_xref="GeneID:852322"	304909..305955	2	TRUE	20304909	20305955	2
	598	chr2_ref v2	PDX3	Gene	complement(306248..306934)	/gene="PDX3"; /locus_tag="YBR035C"; /db_xref="GeneID:852323"	306248..306934	2	TRUE	20306248	20306934	2
	602	chr2_ref v2	CSG2	Gene	complement(309060..310292)	/gene="CSG2"; /locus_tag="YBR036C"; /synonym="CLS2"; /db_xref="GeneID:852324"	309060..310292	2	TRUE	20309060	20310292	2
	604	chr2_ref v2	SCO1	Gene	complement(310544..311431)	/gene="SCO1"; /locus_tag="YBR037C"; /synonym="PET161"; /db_xref="GeneID:852325"	310544..311431	2	TRUE	20310544	20311431	2
	606	chr2_ref v2	CHS2	Gene	311877..314768	/gene="CHS2"; /locus_tag="YBR038W"; /db_xref="GeneID:852326"	311877..314768	2	FALSE	20311877	20314768	2
	608	chr2_ref v2	ATP3	Gene	315554..316489	/gene="ATP3"; /locus_tag="YBR039W"; /db_xref="GeneID:852327"	315554..316489	2	FALSE	20315554	20316489	2
	610	chr2_ref v2	FIG1	Gene	316947..317843	/gene="FIG1"; /locus_tag="YBR040W"; /db_xref="GeneID:852328"	316947..317843	2	FALSE	20316947	20317843	2
	612	chr2_ref v2	FAT1	Gene	318245..320254	/gene="FAT1"; /locus_tag="YBR041W"; /db_xref="GeneID:852329"	318245..320254	2	FALSE	20318245	20320254	2
	614	chr2_ref v2	CST26	Gene	complement(320395..321588)	/gene="CST26"; /locus_tag="YBR042C"; /db_xref="GeneID:852330"	320395..321588	2	TRUE	20320395	20321588	2
	616	chr2_ref v2	QDR3	Gene	complement(321855..323924)	/gene="QDR3"; /locus_tag="YBR043C"; /synonym="AQR2"; /db_xref="GeneID:852331"	321855..323924	2	TRUE	20321855	20323924	2
	618	chr2_ref v2	TCM62	Gene	complement(324316..326038)	/gene="TCM62"; /locus_tag="YBR044C"; /db_xref="GeneID:852332"	324316..326038	2	TRUE	20324316	20326038	2
	620	chr2_ref v2	Gene	Gene	complement(326771..326844)	/locus_tag="TV(UAC)B"; /db_xref="GeneID:852333"	326771..326844	2	TRUE	20326771	20326844	2
	625	chr2_ref v2	GIP1	Gene	complement(328349..330071)	/gene="GIP1"; /locus_tag="YBR045C"; /db_xref="GeneID:852334"	328349..330071	2	TRUE	20328349	20330071	2
	627	chr2_ref v2	ZTA1	Gene	complement(330486..331490)	/gene="ZTA1"; /locus_tag="YBR046C"; /db_xref="GeneID:852335"	330486..331490	2	TRUE	20330486	20331490	2
	629	chr2_ref v2	FMP23	Gene	331812..332339	/gene="FMP23"; /locus_tag="YBR047W"; /db_xref="GeneID:852336"	331812..332339	2	FALSE	20331812	20332339	2
	630	chr2_ref v2	RPS11B	Gene	332810..333791	/gene="RPS11B"; /locus_tag="YBR048W"; /db_xref="GeneID:852337"	332810..333791	2	FALSE	20332810	20333791	2
	634	chr2_ref v2	REB1	Gene	complement(334365..336797)	/gene="REB1"; /locus_tag="YBR049C"; /synonym="GRF2"; /db_xref="GeneID:852338"	334365..336797	2	TRUE	20334365	20336797	2
	636	chr2_ref v2	REG2	Gene	complement(337162..338178)	/gene="REG2"; /locus_tag="YBR050C"; /db_xref="GeneID:852340"	337162..338178	2	TRUE	20337162	20338178	2
	638	chr2_ref v2	RFS1	Gene	complement(338699..339331)	/gene="RFS1"; /locus_tag="YBR052C"; /db_xref="GeneID:852341"	338699..339331	2	TRUE	20338699	20339331	2
	640	chr2_ref v2	Gene	Gene	complement(339654..340730)	/locus_tag="YBR053C"; /db_xref="GeneID:852342"	339654..340730	2	TRUE	20339654	20340730	2
	642	chr2_ref v2	YRO2	Gene	343080..344114	/gene="YRO2"; /locus_tag="YBR054W"; /db_xref="GeneID:852343"	343080..344114	2	FALSE	20343080	20344114	2
	644	chr2_ref v2	PRP6	Gene	complement(344581..347280)	/gene="PRP6"; /locus_tag="YBR055C"; /synonym="TSM7269, RNA6"; /db_xref="GeneID:852344"	344581..347280	2	TRUE	20344581	20347280	2
	645	chr2_ref v2	Gene	Gene	347582..347665	/locus_tag="TL(UAA)B2"; /db_xref="GeneID:852345"	347582..347665	2	FALSE	20347582	20347665	2
	648	chr2_ref v2	Gene	Gene	347858..349363	/locus_tag="YBR056W"; /db_xref="GeneID:852346"	347858..349363	2	FALSE	20347858	20349363	2
	650	chr2_ref v2	Gene	Gene	350806..350877	/locus_tag="TQ(UUG)B"; /db_xref="GeneID:852347"	350806..350877	2	FALSE	20350806	20350877	2
	653	chr2_ref v2	MUM2	Gene	complement(352172..353272)	/gene="MUM2"; /locus_tag="YBR057C"; /db_xref="GeneID:852348"	352172..353272	2	TRUE	20352172	20353272	2
	655	chr2_ref v2	UBP14	Gene	complement(353651..355996)	/gene="UBP14"; /locus_tag="YBR058C"; /synonym="GID6"; /db_xref="GeneID:852349"	353651..355996	2	TRUE	20353651	20355996	2
	657	chr2_ref v2	TSC3	Gene	complement(356303..356545)	/gene="TSC3"; /locus_tag="YBR058C-A"; /db_xref="GeneID:852350"	356303..356545	2	TRUE	20356303	20356545	2
	659	chr2_ref v2	AKL1	Gene	complement(356840..360166)	/gene="AKL1"; /locus_tag="YBR059C"; /db_xref="GeneID:852351"	356840..360166	2	TRUE	20356840	20360166	2
	661	chr2_ref v2	ORC2	Gene	complement(360631..362493)	/gene="ORC2"; /locus_tag="YBR060C"; /synonym="SIR5, RRR1"; /db_xref="GeneID:852352"	360631..362493	2	TRUE	20360631	20362493	2
	663	chr2_ref v2	TRM7	Gene	complement(364766..365698)	/gene="TRM7"; /locus_tag="YBR061C"; /db_xref="GeneID:852353"	364766..365698	2	TRUE	20364766	20365698	2
	664	chr2_ref v2	Gene	Gene	complement(365955..366579)	/locus_tag="YBR062C"; /db_xref="GeneID:852354"	365955..366579	2	TRUE	20365955	20366579	2
	668	chr2_ref v2	Gene	Gene	complement(366949..368163)	/locus_tag="YBR063C"; /db_xref="GeneID:852356"	366949..368163	2	TRUE	20366949	20368163	2
	670	chr2_ref v2	ECM2	Gene	complement(368563..369657)	/gene="ECM2"; /locus_tag="YBR065C"; /synonym="SLT11"; /db_xref="GeneID:852357"	368563..369657	2	TRUE	20368563	20369657	2
	672	chr2_ref v2	NRG2	Gene	complement(370016..370678)	/gene="NRG2"; /locus_tag="YBR066C"; /db_xref="GeneID:852358"	370016..370678	2	TRUE	20370016	20370678	2
	674	chr2_ref v2	TIP1	Gene	complement(372082..372714)	/gene="TIP1"; /locus_tag="YBR067C"; /db_xref="GeneID:852359"	372082..372714	2	TRUE	20372082	20372714	2
	676	chr2_ref v2	BAP2	Gene	complement(373840..375669)	/gene="BAP2"; /locus_tag="YBR068C"; /db_xref="GeneID:852360"	373840..375669	2	TRUE	20373840	20375669	2
	678	chr2_ref v2	TAT1	Gene	complement(376553..378412)	/gene="TAT1"; /locus_tag="YBR069C"; /synonym="VAP1, TAP1"; /db_xref="GeneID:852361"	376553..378412	2	TRUE	20376553	20378412	2
	681	chr2_ref v2	ALG14	Gene	complement(379200..379913)	/gene="ALG14"; /locus_tag="YBR070C"; /db_xref="GeneID:852362"	379200..379913	2	TRUE	20379200	20379913	2
	683	chr2_ref v2	Gene	Gene	380390..381025	/locus_tag="YBR071W"; /db_xref="GeneID:852363"	380390..381025	2	FALSE	20380390	20381025	2
	685	chr2_ref v2	HSP26	Gene	382009..382653	/gene="HSP26"; /locus_tag="YBR072W"; /db_xref="GeneID:852364"	382009..382653	2	FALSE	20382009	20382653	2
	687	chr2_ref v2	Gene	Gene	complement(382839..383000)	/locus_tag="YBR072C-A"; /db_xref="GeneID:1466444"	382839..383000	2	TRUE	20382839	20383000	2
	689	chr2_ref v2	RDH54	Gene	383194..385968	/gene="RDH54"; /locus_tag="YBR073W"; /synonym="TID1"; /db_xref="GeneID:852365"	383194..385968	2	FALSE	20383194	20385968	2
	691	chr2_ref v2	Gene	Gene	386266..389196	/locus_tag="YBR074W"; /synonym="YBR075W"; /db_xref="GeneID:852366"	386266..389196	2	FALSE	20386266	20389196	2
	694	chr2_ref v2	ECM8	Gene	390353..391372	/gene="ECM8"; /locus_tag="YBR076W"; /db_xref="GeneID:852368"	390353..391372	2	FALSE	20390353	20391372	2
	696	chr2_ref v2	SLM4	Gene	complement(391782..392270)	/gene="SLM4"; /locus_tag="YBR077C"; /synonym="GSE1, NIR1, EGO3"; /db_xref="GeneID:852369"	391782..392270	2	TRUE	20391782	20392270	2
	697	chr2_ref v2	ECM33	Gene	393102..394838	/gene="ECM33"; /locus_tag="YBR078W"; /db_xref="GeneID:852370"	393102..394838	2	FALSE	20393102	20394838	2
	701	chr2_ref v2	RPG1	Gene	complement(395362..398256)	/gene="RPG1"; /locus_tag="YBR079C"; /synonym="TIF32"; /db_xref="GeneID:852371"	395362..398256	2	TRUE	20395362	20398256	2
	703	chr2_ref v2	SEC18	Gene	complement(398593..400869)	/gene="SEC18"; /locus_tag="YBR080C"; /synonym="ANU4"; /db_xref="GeneID:852372"	398593..400869	2	TRUE	20398593	20400869	2
	705	chr2_ref v2	SPT7	Gene	complement(401233..405231)	/gene="SPT7"; /locus_tag="YBR081C"; /synonym="GIT2"; /db_xref="GeneID:852373"	401233..405231	2	TRUE	20401233	20405231	2
	706	chr2_ref v2	Gene	Gene	405858..405929	/locus_tag="TR(UCU)B"; /db_xref="GeneID:852374"	405858..405929	2	FALSE	20405858	20405929	2
	708	chr2_ref v2	Gene	Gene	405940..406011	/locus_tag="TD(GUC)B"; /db_xref="GeneID:852375"	405940..406011	2	FALSE	20405940	20406011	2
	710	chr2_ref v2	UBC4	Gene	complement(406608..407149)	/gene="UBC4"; /locus_tag="YBR082C"; /db_xref="GeneID:852376"	406608..407149	2	TRUE	20406608	20407149	2
	715	chr2_ref v2	TEC1	Gene	409148..410608	/gene="TEC1"; /locus_tag="YBR083W"; /synonym="ROC1"; /db_xref="GeneID:852377"	409148..410608	2	FALSE	20409148	20410608	2
	717	chr2_ref v2	MIS1	Gene	411033..413960	/gene="MIS1"; /locus_tag="YBR084W"; /db_xref="GeneID:852378"	411033..413960	2	FALSE	20411033	20413960	2
	718	chr2_ref v2	RPL19A	Gene	complement(414165..415242)	/gene="RPL19A"; /locus_tag="YBR084C-A"; /db_xref="GeneID:852379"	414165..415242	2	TRUE	20414165	20415242	2
	722	chr2_ref v2	AAC3	Gene	415962..416885	/gene="AAC3"; /locus_tag="YBR085W"; /synonym="ANC3"; /db_xref="GeneID:852380"	415962..416885	2	FALSE	20415962	20416885	2
	725	chr2_ref v2	Gene	Gene	complement(418882..419139)	/locus_tag="YBR085C-A"; /db_xref="GeneID:852381"	418882..419139	2	TRUE	20418882	20419139	2
	727	chr2_ref v2	IST2	Gene	complement(420174..423014)	/gene="IST2"; /locus_tag="YBR086C"; /db_xref="GeneID:852382"	420174..423014	2	TRUE	20420174	20423014	2
	729	chr2_ref v2	RFC5	Gene	423739..424803	/gene="RFC5"; /locus_tag="YBR087W"; /db_xref="GeneID:852383"	423739..424803	2	FALSE	20423739	20424803	2
	731	chr2_ref v2	POL30	Gene	complement(424963..425739)	/gene="POL30"; /locus_tag="YBR088C"; /db_xref="GeneID:852385"	424963..425739	2	TRUE	20424963	20425739	2
	733	chr2_ref v2	NHP6B	Gene	complement(426163..426462)	/gene="NHP6B"; /locus_tag="YBR089C-A"; /synonym="YBR090C-A"; /db_xref="GeneID:852386"	426163..426462	2	TRUE	20426163	20426462	2
	734	chr2_ref v2	Gene	Gene	complement(426306..427031)	/locus_tag="YBR090C"; /db_xref="GeneID:852387"	426306..427031	2	TRUE	20426306	20427031	2
	738	chr2_ref v2	MRS5	Gene	complement(427128..427457)	/gene="MRS5"; /locus_tag="YBR091C"; /synonym="TIM12"; /db_xref="GeneID:852388"	427128..427457	2	TRUE	20427128	20427457	2
	740	chr2_ref v2	PHO3	Gene	complement(427667..429070)	/gene="PHO3"; /locus_tag="YBR092C"; /db_xref="GeneID:852389"	427667..429070	2	TRUE	20427667	20429070	2
	742	chr2_ref v2	PHO5	Gene	complement(429517..430920)	/gene="PHO5"; /locus_tag="YBR093C"; /db_xref="GeneID:852390"	429517..430920	2	TRUE	20429517	20430920	2
	744	chr2_ref v2	PBY1	Gene	432005..434266	/gene="PBY1"; /locus_tag="YBR094W"; /db_xref="GeneID:852391"	432005..434266	2	FALSE	20432005	20434266	2
	746	chr2_ref v2	RXT2	Gene	complement(434375..435667)	/gene="RXT2"; /locus_tag="YBR095C"; /synonym="RAF60"; /db_xref="GeneID:852392"	434375..435667	2	TRUE	20434375	20435667	2
	748	chr2_ref v2	Gene	Gene	435990..436682	/locus_tag="YBR096W"; /db_xref="GeneID:852393"	435990..436682	2	FALSE	20435990	20436682	2
	750	chr2_ref v2	VPS15	Gene	436920..441284	/gene="VPS15"; /locus_tag="YBR097W"; /synonym="VPL19, VAC4, GRD8"; /db_xref="GeneID:852394"	436920..441284	2	FALSE	20436920	20441284	2
	753	chr2_ref v2	MMS4	Gene	441484..443559	/gene="MMS4"; /locus_tag="YBR098W"; /synonym="YBR100W, SLX2"; /db_xref="GeneID:852395"	441484..443559	2	FALSE	20441484	20443559	2
	755	chr2_ref v2	FES1	Gene	complement(443790..444662)	/gene="FES1"; /locus_tag="YBR101C"; /db_xref="GeneID:852397"	443790..444662	2	TRUE	20443790	20444662	2
	757	chr2_ref v2	EXO84	Gene	complement(445031..447292)	/gene="EXO84"; /locus_tag="YBR102C"; /synonym="USA3"; /db_xref="GeneID:852398"	445031..447292	2	TRUE	20445031	20447292	2
	759	chr2_ref v2	SIF2	Gene	447678..449285	/gene="SIF2"; /locus_tag="YBR103W"; /synonym="EMB1"; /db_xref="GeneID:852399"	447678..449285	2	FALSE	20447678	20449285	2
	761	chr2_ref v2	YMC2	Gene	449636..450625	/gene="YMC2"; /locus_tag="YBR104W"; /db_xref="GeneID:852401"	449636..450625	2	FALSE	20449636	20450625	2
	763	chr2_ref v2	VID24	Gene	complement(450850..451938)	/gene="VID24"; /locus_tag="YBR105C"; /synonym="GID4"; /db_xref="GeneID:852402"	450850..451938	2	TRUE	20450850	20451938	2
	765	chr2_ref v2	PHO88	Gene	452627..453193	/gene="PHO88"; /locus_tag="YBR106W"; /db_xref="GeneID:852403"	452627..453193	2	FALSE	20452627	20453193	2
	767	chr2_ref v2	IML3	Gene	complement(453762..454499)	/gene="IML3"; /locus_tag="YBR107C"; /synonym="MCM19"; /db_xref="GeneID:852404"	453762..454499	2	TRUE	20453762	20454499	2
	769	chr2_ref v2	AIM3	Gene	454791..457634	/gene="AIM3"; /locus_tag="YBR108W"; /db_xref="GeneID:852405"	454791..457634	2	FALSE	20454791	20457634	2
	771	chr2_ref v2	CMD1	Gene	complement(457888..458331)	/gene="CMD1"; /locus_tag="YBR109C"; /db_xref="GeneID:852406"	457888..458331	2	TRUE	20457888	20458331	2
	773	chr2_ref v2	ALG1	Gene	458841..460190	/gene="ALG1"; /locus_tag="YBR110W"; /db_xref="GeneID:852407"	458841..460190	2	FALSE	20458841	20460190	2
	775	chr2_ref v2	YSA1	Gene	complement(461147..461842)	/gene="YSA1"; /locus_tag="YBR111C"; /synonym="RMA2"; /db_xref="GeneID:852408"	461147..461842	2	TRUE	20461147	20461842	2
	776	chr2_ref v2	SUS1	Gene	462108..462548	/gene="SUS1"; /locus_tag="YBR111W-A"; /db_xref="GeneID:1466445"	462108..462548	2	FALSE	20462108	20462548	2
	781	chr2_ref v2	CYC8	Gene	complement(462839..465739)	/gene="CYC8"; /locus_tag="YBR112C"; /synonym="SSN6, CRT8"; /db_xref="GeneID:852410"	462839..465739	2	TRUE	20462839	20465739	2
	783	chr2_ref v2	RAD16	Gene	467217..469589	/gene="RAD16"; /locus_tag="YBR114W"; /synonym="PSO5"; /db_xref="GeneID:852411"	467217..469589	2	FALSE	20467217	20469589	2
	785	chr2_ref v2	LYS2	Gene	complement(469717..473893)	/gene="LYS2"; /locus_tag="YBR115C"; /db_xref="GeneID:852412"	469717..473893	2	TRUE	20469717	20473893	2
	787	chr2_ref v2	TKL2	Gene	complement(474359..476404)	/gene="TKL2"; /locus_tag="YBR117C"; /db_xref="GeneID:852414"	474359..476404	2	TRUE	20474359	20476404	2
	789	chr2_ref v2	TEF2	Gene	477638..479014	/gene="TEF2"; /locus_tag="YBR118W"; /db_xref="GeneID:852415"	477638..479014	2	FALSE	20477638	20479014	2
	790	chr2_ref v2	MUD1	Gene	479305..480290	/gene="MUD1"; /locus_tag="YBR119W"; /db_xref="GeneID:852416"	479305..480290	2	FALSE	20479305	20480290	2
	794	chr2_ref v2	CBP6	Gene	complement(480402..480890)	/gene="CBP6"; /locus_tag="YBR120C"; /db_xref="GeneID:852417"	480402..480890	2	TRUE	20480402	20480890	2
	796	chr2_ref v2	GRS1	Gene	complement(481331..483334)	/gene="GRS1"; /locus_tag="YBR121C"; /db_xref="GeneID:852418"	481331..483334	2	TRUE	20481331	20483334	2
	798	chr2_ref v2	MRPL36	Gene	complement(483937..484470)	/gene="MRPL36"; /locus_tag="YBR122C"; /db_xref="GeneID:852419"	483937..484470	2	TRUE	20483937	20484470	2
	800	chr2_ref v2	TFC1	Gene	complement(484709..486658)	/gene="TFC1"; /locus_tag="YBR123C"; /db_xref="GeneID:852421"	484709..486658	2	TRUE	20484709	20486658	2
	803	chr2_ref v2	PTC4	Gene	complement(487166..488347)	/gene="PTC4"; /locus_tag="YBR125C"; /synonym="GCT1"; /db_xref="GeneID:852422"	487166..488347	2	TRUE	20487166	20488347	2
	805	chr2_ref v2	TPS1	Gene	complement(488872..490359)	/gene="TPS1"; /locus_tag="YBR126C"; /synonym="TSS1, GLC6, GGS1, FDP1, CIF1, BYP1"; /db_xref="GeneID:852423"	488872..490359	2	TRUE	20488872	20490359	2
	807	chr2_ref v2	VMA2	Gene	complement(491236..492789)	/gene="VMA2"; /locus_tag="YBR127C"; /synonym="VAT2"; /db_xref="GeneID:852424"	491236..492789	2	TRUE	20491236	20492789	2
	809	chr2_ref v2	ATG14	Gene	complement(493048..494082)	/gene="ATG14"; /locus_tag="YBR128C"; /synonym="APG14, CVT12"; /db_xref="GeneID:852425"	493048..494082	2	TRUE	20493048	20494082	2
	811	chr2_ref v2	OPY1	Gene	complement(494320..495306)	/gene="OPY1"; /locus_tag="YBR129C"; /db_xref="GeneID:852426"	494320..495306	2	TRUE	20494320	20495306	2
	813	chr2_ref v2	SHE3	Gene	complement(495559..496836)	/gene="SHE3"; /locus_tag="YBR130C"; /db_xref="GeneID:852427"	495559..496836	2	TRUE	20495559	20496836	2
	815	chr2_ref v2	CCZ1	Gene	497130..499244	/gene="CCZ1"; /locus_tag="YBR131W"; /synonym="CVT16"; /db_xref="GeneID:852428"	497130..499244	2	FALSE	20497130	20499244	2
	817	chr2_ref v2	AGP2	Gene	complement(499619..501409)	/gene="AGP2"; /locus_tag="YBR132C"; /db_xref="GeneID:852429"	499619..501409	2	TRUE	20499619	20501409	2
	819	chr2_ref v2	HSL7	Gene	complement(501771..504254)	/gene="HSL7"; /locus_tag="YBR133C"; /db_xref="GeneID:852431"	501771..504254	2	TRUE	20501771	20504254	2
	821	chr2_ref v2	CKS1	Gene	504821..505273	/gene="CKS1"; /locus_tag="YBR135W"; /db_xref="GeneID:852432"	504821..505273	2	FALSE	20504821	20505273	2
	823	chr2_ref v2	MEC1	Gene	505635..512741	/gene="MEC1"; /locus_tag="YBR136W"; /synonym="SAD3, ESR1"; /db_xref="GeneID:852433"	505635..512741	2	FALSE	20505635	20512741	2
	825	chr2_ref v2	Gene	Gene	513011..513550	/locus_tag="YBR137W"; /db_xref="GeneID:852434"	513011..513550	2	FALSE	20513011	20513550	2
	827	chr2_ref v2	Gene	Gene	complement(513729..515303)	/locus_tag="YBR138C"; /db_xref="GeneID:852435"	513729..515303	2	TRUE	20513729	20515303	2
	829	chr2_ref v2	Gene	Gene	515631..517157	/locus_tag="YBR139W"; /db_xref="GeneID:852436"	515631..517157	2	FALSE	20515631	20517157	2
	832	chr2_ref v2	IRA1	Gene	complement(517317..526595)	/gene="IRA1"; /locus_tag="YBR140C"; /synonym="PPD1, GLC1"; /db_xref="GeneID:852437"	517317..526595	2	TRUE	20517317	20526595	2
	834	chr2_ref v2	Gene	Gene	complement(526992..528005)	/locus_tag="YBR141C"; /db_xref="GeneID:852438"	526992..528005	2	TRUE	20526992	20528005	2
	836	chr2_ref v2	MAK5	Gene	528284..530605	/gene="MAK5"; /locus_tag="YBR142W"; /db_xref="GeneID:852439"	528284..530605	2	FALSE	20528284	20530605	2
	838	chr2_ref v2	SUP45	Gene	complement(530836..532149)	/gene="SUP45"; /locus_tag="YBR143C"; /synonym="SUP47, SUP1, SAL4"; /db_xref="GeneID:852440"	530836..532149	2	TRUE	20530836	20532149	2
	840	chr2_ref v2	ADH5	Gene	533729..534784	/gene="ADH5"; /locus_tag="YBR145W"; /db_xref="GeneID:852442"	533729..534784	2	FALSE	20533729	20534784	2
	842	chr2_ref v2	MRPS9	Gene	535227..536063	/gene="MRPS9"; /locus_tag="YBR146W"; /db_xref="GeneID:852443"	535227..536063	2	FALSE	20535227	20536063	2
	844	chr2_ref v2	Gene	Gene	536542..537432	/locus_tag="YBR147W"; /db_xref="GeneID:852444"	536542..537432	2	FALSE	20536542	20537432	2
	846	chr2_ref v2	YSW1	Gene	537843..539672	/gene="YSW1"; /locus_tag="YBR148W"; /db_xref="GeneID:852445"	537843..539672	2	FALSE	20537843	20539672	2
	849	chr2_ref v2	ARA1	Gene	539954..540988	/gene="ARA1"; /locus_tag="YBR149W"; /db_xref="GeneID:852446"	539954..540988	2	FALSE	20539954	20540988	2
	851	chr2_ref v2	TBS1	Gene	complement(541176..544460)	/gene="TBS1"; /locus_tag="YBR150C"; /db_xref="GeneID:852447"	541176..544460	2	TRUE	20541176	20544460	2
	853	chr2_ref v2	APD1	Gene	544995..545945	/gene="APD1"; /locus_tag="YBR151W"; /db_xref="GeneID:852448"	544995..545945	2	FALSE	20544995	20545945	2
	855	chr2_ref v2	SPP381	Gene	546343..547218	/gene="SPP381"; /locus_tag="YBR152W"; /db_xref="GeneID:852449"	546343..547218	2	FALSE	20546343	20547218	2
	857	chr2_ref v2	RIB7	Gene	547427..548161	/gene="RIB7"; /locus_tag="YBR153W"; /db_xref="GeneID:852450"	547427..548161	2	FALSE	20547427	20548161	2
	859	chr2_ref v2	RPB5	Gene	complement(548329..548976)	/gene="RPB5"; /locus_tag="YBR154C"; /db_xref="GeneID:852451"	548329..548976	2	TRUE	20548329	20548976	2
	861	chr2_ref v2	CNS1	Gene	549738..550895	/gene="CNS1"; /locus_tag="YBR155W"; /db_xref="GeneID:852452"	549738..550895	2	FALSE	20549738	20550895	2
	863	chr2_ref v2	SLI15	Gene	complement(551071..553167)	/gene="SLI15"; /locus_tag="YBR156C"; /db_xref="GeneID:852453"	551071..553167	2	TRUE	20551071	20553167	2
	865	chr2_ref v2	ICS2	Gene	complement(553510..554277)	/gene="ICS2"; /locus_tag="YBR157C"; /db_xref="GeneID:852454"	553510..554277	2	TRUE	20553510	20554277	2
	867	chr2_ref v2	AMN1	Gene	556516..558165	/gene="AMN1"; /locus_tag="YBR158W"; /synonym="CST13, ICS4"; /db_xref="GeneID:852455"	556516..558165	2	FALSE	20556516	20558165	2
	869	chr2_ref v2	IFA38	Gene	558652..559695	/gene="IFA38"; /locus_tag="YBR159W"; /db_xref="GeneID:852456"	558652..559695	2	FALSE	20558652	20559695	2
	871	chr2_ref v2	CDC28	Gene	560045..560941	/gene="CDC28"; /locus_tag="YBR160W"; /synonym="SRM5, HSL5, CDK1"; /db_xref="GeneID:852457"	560045..560941	2	FALSE	20560045	20560941	2
	873	chr2_ref v2	CSH1	Gene	561601..562731	/gene="CSH1"; /locus_tag="YBR161W"; /db_xref="GeneID:852458"	561601..562731	2	FALSE	20561601	20562731	2
	875	chr2_ref v2	TOS1	Gene	complement(563170..564537)	/gene="TOS1"; /locus_tag="YBR162C"; /db_xref="GeneID:852459"	563170..564537	2	TRUE	20563170	20564537	2
	877	chr2_ref v2	YSY6	Gene	565198..565395	/gene="YSY6"; /locus_tag="YBR162W-A"; /db_xref="GeneID:852460"	565198..565395	2	FALSE	20565198	20565395	2
	879	chr2_ref v2	DEM1	Gene	565690..567447	/gene="DEM1"; /locus_tag="YBR163W"; /db_xref="GeneID:852461"	565690..567447	2	FALSE	20565690	20567447	2
	881	chr2_ref v2	ARL1	Gene	complement(567842..568393)	/gene="ARL1"; /locus_tag="YBR164C"; /synonym="DLP2"; /db_xref="GeneID:852462"	567842..568393	2	TRUE	20567842	20568393	2
	883	chr2_ref v2	UBS1	Gene	568819..569652	/gene="UBS1"; /locus_tag="YBR165W"; /db_xref="GeneID:852463"	568819..569652	2	FALSE	20568819	20569652	2
	885	chr2_ref v2	TYR1	Gene	complement(569809..571167)	/gene="TYR1"; /locus_tag="YBR166C"; /db_xref="GeneID:852464"	569809..571167	2	TRUE	20569809	20571167	2
	887	chr2_ref v2	POP7	Gene	complement(571435..571857)	/gene="POP7"; /locus_tag="YBR167C"; /synonym="RPP2"; /db_xref="GeneID:852465"	571435..571857	2	TRUE	20571435	20571857	2
	889	chr2_ref v2	PEX32	Gene	572338..573579	/gene="PEX32"; /locus_tag="YBR168W"; /db_xref="GeneID:852466"	572338..573579	2	FALSE	20572338	20573579	2
	891	chr2_ref v2	SSE2	Gene	complement(573882..575963)	/gene="SSE2"; /locus_tag="YBR169C"; /db_xref="GeneID:852467"	573882..575963	2	TRUE	20573882	20575963	2
	893	chr2_ref v2	NPL4	Gene	complement(576311..578053)	/gene="NPL4"; /locus_tag="YBR170C"; /synonym="HRD4"; /db_xref="GeneID:852468"	576311..578053	2	TRUE	20576311	20578053	2
	895	chr2_ref v2	SEC66	Gene	578331..578951	/gene="SEC66"; /locus_tag="YBR171W"; /synonym="SEC71, HSS1"; /db_xref="GeneID:852469"	578331..578951	2	FALSE	20578331	20578951	2
	897	chr2_ref v2	SMY2	Gene	complement(579117..581339)	/gene="SMY2"; /locus_tag="YBR172C"; /db_xref="GeneID:852470"	579117..581339	2	TRUE	20579117	20581339	2
	899	chr2_ref v2	UMP1	Gene	complement(581693..582139)	/gene="UMP1"; /locus_tag="YBR173C"; /synonym="RNS2"; /db_xref="GeneID:852471"	581693..582139	2	TRUE	20581693	20582139	2
	901	chr2_ref v2	SWD3	Gene	582375..583322	/gene="SWD3"; /locus_tag="YBR175W"; /synonym="SAF35, CPS30"; /db_xref="GeneID:852472"	582375..583322	2	FALSE	20582375	20583322	2
	903	chr2_ref v2	ECM31	Gene	583687..584625	/gene="ECM31"; /locus_tag="YBR176W"; /db_xref="GeneID:852474"	583687..584625	2	FALSE	20583687	20584625	2
	905	chr2_ref v2	EHT1	Gene	complement(584774..586129)	/gene="EHT1"; /locus_tag="YBR177C"; /db_xref="GeneID:852476"	584774..586129	2	TRUE	20584774	20586129	2
	907	chr2_ref v2	FZO1	Gene	complement(586514..589081)	/gene="FZO1"; /locus_tag="YBR179C"; /db_xref="GeneID:852477"	586514..589081	2	TRUE	20586514	20589081	2
	909	chr2_ref v2	DTR1	Gene	589708..591426	/gene="DTR1"; /locus_tag="YBR180W"; /db_xref="GeneID:852478"	589708..591426	2	FALSE	20589708	20591426	2
	911	chr2_ref v2	RPS6B	Gene	complement(591679..592741)	/gene="RPS6B"; /locus_tag="YBR181C"; /synonym="RPS102, RPS101, LPG18"; /db_xref="GeneID:852479"	591679..592741	2	TRUE	20591679	20592741	2
	915	chr2_ref v2	SMP1	Gene	complement(593473..594831)	/gene="SMP1"; /locus_tag="YBR182C"; /db_xref="GeneID:852480"	593473..594831	2	TRUE	20593473	20594831	2
	917	chr2_ref v2	Gene	Gene	complement(595328..595522)	/locus_tag="YBR182C-A"; /db_xref="GeneID:1466446"	595328..595522	2	TRUE	20595328	20595522	2
	919	chr2_ref v2	YPC1	Gene	596082..597032	/gene="YPC1"; /locus_tag="YBR183W"; /db_xref="GeneID:852481"	596082..597032	2	FALSE	20596082	20597032	2
	921	chr2_ref v2	Gene	Gene	597330..598901	/locus_tag="YBR184W"; /db_xref="GeneID:852482"	597330..598901	2	FALSE	20597330	20598901	2
	923	chr2_ref v2	MBA1	Gene	complement(599090..599926)	/gene="MBA1"; /locus_tag="YBR185C"; /db_xref="GeneID:852483"	599090..599926	2	TRUE	20599090	20599926	2
	924	chr2_ref v2	PCH2	Gene	600520..602327	/gene="PCH2"; /locus_tag="YBR186W"; /db_xref="GeneID:852484"	600520..602327	2	FALSE	20600520	20602327	2
	928	chr2_ref v2	GDT1	Gene	602601..603443	/gene="GDT1"; /locus_tag="YBR187W"; /db_xref="GeneID:852485"	602601..603443	2	FALSE	20602601	20603443	2
	930	chr2_ref v2	NTC20	Gene	complement(603652..604074)	/gene="NTC20"; /locus_tag="YBR188C"; /db_xref="GeneID:852486"	603652..604074	2	TRUE	20603652	20604074	2
	931	chr2_ref v2	RPS9B	Gene	604475..605475	/gene="RPS9B"; /locus_tag="YBR189W"; /synonym="SUP46, RPS13A"; /db_xref="GeneID:852487"	604475..605475	2	FALSE	20604475	20605475	2
	934	chr2_ref v2	RPL21A	Gene	606237..607107	/gene="RPL21A"; /locus_tag="YBR191W"; /synonym="URP1"; /db_xref="GeneID:852489"	606237..607107	2	FALSE	20606237	20607107	2
	938	chr2_ref v2	RIM2	Gene	607619..608752	/gene="RIM2"; /locus_tag="YBR192W"; /synonym="PYT1"; /db_xref="GeneID:852491"	607619..608752	2	FALSE	20607619	20608752	2
	940	chr2_ref v2	MED8	Gene	complement(609049..609720)	/gene="MED8"; /locus_tag="YBR193C"; /db_xref="GeneID:852492"	609049..609720	2	TRUE	20609049	20609720	2
	942	chr2_ref v2	AIM4	Gene	610005..610376	/gene="AIM4"; /locus_tag="YBR194W"; /db_xref="GeneID:852493"	610005..610376	2	FALSE	20610005	20610376	2
	944	chr2_ref v2	MSI1	Gene	complement(610581..611849)	/gene="MSI1"; /locus_tag="YBR195C"; /synonym="CAC3"; /db_xref="GeneID:852494"	610581..611849	2	TRUE	20610581	20611849	2
	947	chr2_ref v2	PGI1	Gene	complement(612203..613867)	/gene="PGI1"; /locus_tag="YBR196C"; /synonym="CDC30"; /db_xref="GeneID:852495"	612203..613867	2	TRUE	20612203	20613867	2
	949	chr2_ref v2	Gene	Gene	complement(613991..614140)	/locus_tag="YBR196C-A"; /db_xref="GeneID:1466447"	613991..614140	2	TRUE	20613991	20614140	2
	951	chr2_ref v2	Gene	Gene	complement(614493..614597)	/locus_tag="YBR196C-B"; /db_xref="GeneID:1466448"	614493..614597	2	TRUE	20614493	20614597	2
	953	chr2_ref v2	Gene	Gene	complement(615170..615823)	/locus_tag="YBR197C"; /db_xref="GeneID:852496"	615170..615823	2	TRUE	20615170	20615823	2
	955	chr2_ref v2	TAF5	Gene	complement(616094..618490)	/gene="TAF5"; /locus_tag="YBR198C"; /synonym="TAF90"; /db_xref="GeneID:852497"	616094..618490	2	TRUE	20616094	20618490	2
	957	chr2_ref v2	KTR4	Gene	618876..620270	/gene="KTR4"; /locus_tag="YBR199W"; /db_xref="GeneID:852498"	618876..620270	2	FALSE	20618876	20620270	2
	959	chr2_ref v2	BEM1	Gene	620839..622494	/gene="BEM1"; /locus_tag="YBR200W"; /synonym="SRO1"; /db_xref="GeneID:852499"	620839..622494	2	FALSE	20620839	20622494	2
	962	chr2_ref v2	Gene	Gene	622950..623114	/locus_tag="YBR200W-A"; /db_xref="GeneID:1466449"	622950..623114	2	FALSE	20622950	20623114	2
	964	chr2_ref v2	DER1	Gene	623543..624178	/gene="DER1"; /locus_tag="YBR201W"; /db_xref="GeneID:852500"	623543..624178	2	FALSE	20623543	20624178	2
	966	chr2_ref v2	Gene	Gene	complement(624460..624663)	/locus_tag="YBR201C-A"; /db_xref="GeneID:3799967"	624460..624663	2	TRUE	20624460	20624663	2
	968	chr2_ref v2	MCM7	Gene	625739..628276	/gene="MCM7"; /locus_tag="YBR202W"; /synonym="CDC47"; /db_xref="GeneID:852501"	625739..628276	2	FALSE	20625739	20628276	2
	970	chr2_ref v2	COS111	Gene	629135..631909	/gene="COS111"; /locus_tag="YBR203W"; /db_xref="GeneID:852502"	629135..631909	2	FALSE	20629135	20631909	2
	973	chr2_ref v2	Gene	Gene	complement(632221..633348)	/locus_tag="YBR204C"; /db_xref="GeneID:852503"	632221..633348	2	TRUE	20632221	20633348	2
	975	chr2_ref v2	KTR3	Gene	633589..634803	/gene="KTR3"; /locus_tag="YBR205W"; /db_xref="GeneID:852504"	633589..634803	2	FALSE	20633589	20634803	2
	977	chr2_ref v2	FTH1	Gene	635113..636510	/gene="FTH1"; /locus_tag="YBR207W"; /db_xref="GeneID:852506"	635113..636510	2	FALSE	20635113	20636510	2
	979	chr2_ref v2	DUR1,2	Gene	complement(636670..642177)	/gene="DUR1,2"; /locus_tag="YBR208C"; /synonym="DUR80"; /db_xref="GeneID:852507"	636670..642177	2	TRUE	20636670	20642177	2
	980	chr2_ref v2	Gene	Gene	complement(642974..643045)	/locus_tag="TC(GCA)B"; /db_xref="GeneID:852509"	642974..643045	2	TRUE	20642974	20643045	2
	985	chr2_ref v2	Gene	Gene	645134..645205	/locus_tag="TE(UUC)B"; /db_xref="GeneID:852510"	645134..645205	2	FALSE	20645134	20645205	2
	988	chr2_ref v2	ERV15	Gene	645517..645945	/gene="ERV15"; /locus_tag="YBR210W"; /db_xref="GeneID:852511"	645517..645945	2	FALSE	20645517	20645945	2
	990	chr2_ref v2	AME1	Gene	complement(646125..647099)	/gene="AME1"; /locus_tag="YBR211C"; /synonym="ARP100"; /db_xref="GeneID:852512"	646125..647099	2	TRUE	20646125	20647099	2
	992	chr2_ref v2	NGR1	Gene	647853..649871	/gene="NGR1"; /locus_tag="YBR212W"; /synonym="RBP1"; /db_xref="GeneID:852513"	647853..649871	2	FALSE	20647853	20649871	2
	994	chr2_ref v2	MET8	Gene	650335..651159	/gene="MET8"; /locus_tag="YBR213W"; /db_xref="GeneID:852514"	650335..651159	2	FALSE	20650335	20651159	2
	996	chr2_ref v2	SDS24	Gene	651382..652965	/gene="SDS24"; /locus_tag="YBR214W"; /db_xref="GeneID:852515"	651382..652965	2	FALSE	20651382	20652965	2
	997	chr2_ref v2	HPC2	Gene	653323..655284	/gene="HPC2"; /locus_tag="YBR215W"; /db_xref="GeneID:852516"	653323..655284	2	FALSE	20653323	20655284	2
	1001	chr2_ref v2	YBP1	Gene	complement(655543..657567)	/gene="YBP1"; /locus_tag="YBR216C"; /db_xref="GeneID:852517"	655543..657567	2	TRUE	20655543	20657567	2
	1003	chr2_ref v2	ATG12	Gene	657799..658359	/gene="ATG12"; /locus_tag="YBR217W"; /synonym="APG12"; /db_xref="GeneID:852518"	657799..658359	2	FALSE	20657799	20658359	2
	1005	chr2_ref v2	PYC2	Gene	complement(658674..662216)	/gene="PYC2"; /locus_tag="YBR218C"; /db_xref="GeneID:852519"	658674..662216	2	TRUE	20658674	20662216	2
	1006	chr2_ref v2	Gene	Gene	complement(662466..663270)	/locus_tag="YBR219C"; /db_xref="GeneID:852520"	662466..663270	2	TRUE	20662466	20663270	2
	1009	chr2_ref v2	Gene	Gene	complement(662962..664644)	/locus_tag="YBR220C"; /db_xref="GeneID:852521"	662962..664644	2	TRUE	20662962	20664644	2
	1012	chr2_ref v2	PDB1	Gene	complement(665120..666220)	/gene="PDB1"; /locus_tag="YBR221C"; /db_xref="GeneID:852522"	665120..666220	2	TRUE	20665120	20666220	2
	1014	chr2_ref v2	Gene	Gene	666505..666609	/locus_tag="YBR221W-A"; /db_xref="GeneID:1466450"	666505..666609	2	FALSE	20666505	20666609	2
	1016	chr2_ref v2	PCS60	Gene	complement(666687..668318)	/gene="PCS60"; /locus_tag="YBR222C"; /synonym="FAT2"; /db_xref="GeneID:852523"	666687..668318	2	TRUE	20666687	20668318	2
	1018	chr2_ref v2	TDP1	Gene	complement(668630..670264)	/gene="TDP1"; /locus_tag="YBR223C"; /db_xref="GeneID:852525"	668630..670264	2	TRUE	20668630	20670264	2
	1020	chr2_ref v2	Gene	Gene	670594..673296	/locus_tag="YBR225W"; /db_xref="GeneID:852526"	670594..673296	2	FALSE	20670594	20673296	2
	1022	chr2_ref v2	MCX1	Gene	complement(673539..675101)	/gene="MCX1"; /locus_tag="YBR227C"; /db_xref="GeneID:852528"	673539..675101	2	TRUE	20673539	20675101	2
	1024	chr2_ref v2	SLX1	Gene	675280..676194	/gene="SLX1"; /locus_tag="YBR228W"; /db_xref="GeneID:852529"	675280..676194	2	FALSE	20675280	20676194	2
	1027	chr2_ref v2	ROT2	Gene	complement(676324..679188)	/gene="ROT2"; /locus_tag="YBR229C"; /synonym="GLS2"; /db_xref="GeneID:852530"	676324..679188	2	TRUE	20676324	20679188	2
	1028	chr2_ref v2	OM14	Gene	complement(679516..680017)	/gene="OM14"; /locus_tag="YBR230C"; /db_xref="GeneID:852531"	679516..680017	2	TRUE	20679516	20680017	2
	1032	chr2_ref v2	Gene	Gene	680327..680527	/locus_tag="YBR230W-A"; /db_xref="GeneID:2777172"	680327..680527	2	FALSE	20680327	20680527	2
	1035	chr2_ref v2	SWC5	Gene	complement(682144..683055)	/gene="SWC5"; /locus_tag="YBR231C"; /synonym="AOR1"; /db_xref="GeneID:852532"	682144..683055	2	TRUE	20682144	20683055	2
	1037	chr2_ref v2	PBP2	Gene	683393..684634	/gene="PBP2"; /locus_tag="YBR233W"; /synonym="HEK1"; /db_xref="GeneID:852533"	683393..684634	2	FALSE	20683393	20684634	2
	1039	chr2_ref v2	DAD3	Gene	684942..685226	/gene="DAD3"; /locus_tag="YBR233W-A"; /db_xref="GeneID:852535"	684942..685226	2	FALSE	20684942	20685226	2
	1041	chr2_ref v2	ARC40	Gene	complement(685405..686559)	/gene="ARC40"; /locus_tag="YBR234C"; /db_xref="GeneID:852536"	685405..686559	2	TRUE	20685405	20686559	2
	1043	chr2_ref v2	Gene	Gene	686868..690230	/locus_tag="YBR235W"; /db_xref="GeneID:852537"	686868..690230	2	FALSE	20686868	20690230	2
	1045	chr2_ref v2	ABD1	Gene	complement(690350..691660)	/gene="ABD1"; /locus_tag="YBR236C"; /db_xref="GeneID:852538"	690350..691660	2	TRUE	20690350	20691660	2
	1047	chr2_ref v2	PRP5	Gene	691936..694485	/gene="PRP5"; /locus_tag="YBR237W"; /synonym="RNA5"; /db_xref="GeneID:852539"	691936..694485	2	FALSE	20691936	20694485	2
	1049	chr2_ref v2	Gene	Gene	complement(695075..697270)	/locus_tag="YBR238C"; /db_xref="GeneID:852540"	695075..697270	2	TRUE	20695075	20697270	2
	1051	chr2_ref v2	Gene	Gene	complement(698320..699909)	/locus_tag="YBR239C"; /db_xref="GeneID:852541"	698320..699909	2	TRUE	20698320	20699909	2
	1053	chr2_ref v2	THI2	Gene	complement(700456..701808)	/gene="THI2"; /locus_tag="YBR240C"; /synonym="PHO6"; /db_xref="GeneID:852542"	700456..701808	2	TRUE	20700456	20701808	2
	1055	chr2_ref v2	Gene	Gene	complement(702555..704021)	/locus_tag="YBR241C"; /db_xref="GeneID:852543"	702555..704021	2	TRUE	20702555	20704021	2
	1058	chr2_ref v2	Gene	Gene	704636..705352	/locus_tag="YBR242W"; /db_xref="GeneID:852544"	704636..705352	2	FALSE	20704636	20705352	2
	1060	chr2_ref v2	ALG7	Gene	complement(705413..706759)	/gene="ALG7"; /locus_tag="YBR243C"; /synonym="TUR1"; /db_xref="GeneID:852545"	705413..706759	2	TRUE	20705413	20706759	2
	1062	chr2_ref v2	GPX2	Gene	707494..707982	/gene="GPX2"; /locus_tag="YBR244W"; /synonym="AMI1"; /db_xref="GeneID:852546"	707494..707982	2	FALSE	20707494	20707982	2
	1065	chr2_ref v2	ISW1	Gene	complement(708116..711505)	/gene="ISW1"; /locus_tag="YBR245C"; /synonym="SGN2"; /db_xref="GeneID:852547"	708116..711505	2	TRUE	20708116	20711505	2
	1067	chr2_ref v2	Gene	Gene	711557..712720	/locus_tag="YBR246W"; /db_xref="GeneID:852548"	711557..712720	2	FALSE	20711557	20712720	2
	1069	chr2_ref v2	ENP1	Gene	complement(712970..714421)	/gene="ENP1"; /locus_tag="YBR247C"; /synonym="MEG1"; /db_xref="GeneID:852549"	712970..714421	2	TRUE	20712970	20714421	2
	1071	chr2_ref v2	HIS7	Gene	complement(714771..716428)	/gene="HIS7"; /locus_tag="YBR248C"; /db_xref="GeneID:852550"	714771..716428	2	TRUE	20714771	20716428	2
	1073	chr2_ref v2	ARO4	Gene	complement(716845..717957)	/gene="ARO4"; /locus_tag="YBR249C"; /db_xref="GeneID:852551"	716845..717957	2	TRUE	20716845	20717957	2
	1075	chr2_ref v2	SPO23	Gene	718996..720567	/gene="SPO23"; /locus_tag="YBR250W"; /db_xref="GeneID:852552"	718996..720567	2	FALSE	20718996	20720567	2
	1077	chr2_ref v2	MRPS5	Gene	721353..722276	/gene="MRPS5"; /locus_tag="YBR251W"; /db_xref="GeneID:852553"	721353..722276	2	FALSE	20721353	20722276	2
	1079	chr2_ref v2	DUT1	Gene	722574..723017	/gene="DUT1"; /locus_tag="YBR252W"; /db_xref="GeneID:852554"	722574..723017	2	FALSE	20722574	20723017	2
	1081	chr2_ref v2	SRB6	Gene	723233..723598	/gene="SRB6"; /locus_tag="YBR253W"; /synonym="MED22"; /db_xref="GeneID:852555"	723233..723598	2	FALSE	20723233	20723598	2
	1083	chr2_ref v2	TRS20	Gene	complement(723699..724226)	/gene="TRS20"; /locus_tag="YBR254C"; /db_xref="GeneID:852556"	723699..724226	2	TRUE	20723699	20724226	2
	1085	chr2_ref v2	Gene	Gene	724419..726503	/locus_tag="YBR255W"; /db_xref="GeneID:852557"	724419..726503	2	FALSE	20724419	20726503	2
	1086	chr2_ref v2	Gene	Gene	complement(726581..727037)	/locus_tag="YBR255C-A"; /db_xref="GeneID:852558"	726581..727037	2	TRUE	20726581	20727037	2
	1090	chr2_ref v2	RIB5	Gene	complement(727349..728065)	/gene="RIB5"; /locus_tag="YBR256C"; /db_xref="GeneID:852559"	727349..728065	2	TRUE	20727349	20728065	2
	1092	chr2_ref v2	POP4	Gene	728848..729687	/gene="POP4"; /locus_tag="YBR257W"; /db_xref="GeneID:852560"	728848..729687	2	FALSE	20728848	20729687	2
	1094	chr2_ref v2	SHG1	Gene	complement(729697..730125)	/gene="SHG1"; /locus_tag="YBR258C"; /synonym="CPS15"; /db_xref="GeneID:852561"	729697..730125	2	TRUE	20729697	20730125	2
	1096	chr2_ref v2	Gene	Gene	730350..732416	/locus_tag="YBR259W"; /db_xref="GeneID:852562"	730350..732416	2	FALSE	20730350	20732416	2
	1098	chr2_ref v2	RGD1	Gene	complement(732602..734602)	/gene="RGD1"; /locus_tag="YBR260C"; /db_xref="GeneID:852563"	732602..734602	2	TRUE	20732602	20734602	2
	1100	chr2_ref v2	Gene	Gene	complement(734795..735493)	/locus_tag="YBR261C"; /db_xref="GeneID:852564"	734795..735493	2	TRUE	20734795	20735493	2
	1102	chr2_ref v2	AIM5	Gene	complement(735683..736003)	/gene="AIM5"; /locus_tag="YBR262C"; /db_xref="GeneID:852566"	735683..736003	2	TRUE	20735683	20736003	2
	1104	chr2_ref v2	SHM1	Gene	736227..737699	/gene="SHM1"; /locus_tag="YBR263W"; /synonym="TMP3, SHMT1"; /db_xref="GeneID:852565"	736227..737699	2	FALSE	20736227	20737699	2
	1106	chr2_ref v2	YPT10	Gene	complement(737733..738332)	/gene="YPT10"; /locus_tag="YBR264C"; /db_xref="GeneID:852567"	737733..738332	2	TRUE	20737733	20738332	2
	1108	chr2_ref v2	TSC10	Gene	738545..739507	/gene="TSC10"; /locus_tag="YBR265W"; /db_xref="GeneID:852568"	738545..739507	2	FALSE	20738545	20739507	2
	1110	chr2_ref v2	REI1	Gene	739804..740985	/gene="REI1"; /locus_tag="YBR267W"; /db_xref="GeneID:852569"	739804..740985	2	FALSE	20739804	20740985	2
	1112	chr2_ref v2	MRPL37	Gene	741262..741579	/gene="MRPL37"; /locus_tag="YBR268W"; /db_xref="GeneID:852571"	741262..741579	2	FALSE	20741262	20741579	2
	1115	chr2_ref v2	FMP21	Gene	complement(742123..742539)	/gene="FMP21"; /locus_tag="YBR269C"; /db_xref="GeneID:852572"	742123..742539	2	TRUE	20742123	20742539	2
	1117	chr2_ref v2	BIT2	Gene	complement(742724..744361)	/gene="BIT2"; /locus_tag="YBR270C"; /db_xref="GeneID:852573"	742724..744361	2	TRUE	20742724	20744361	2
	1119	chr2_ref v2	Gene	Gene	744815..746074	/locus_tag="YBR271W"; /db_xref="GeneID:852574"	744815..746074	2	FALSE	20744815	20746074	2
	1121	chr2_ref v2	HSM3	Gene	complement(746324..747766)	/gene="HSM3"; /locus_tag="YBR272C"; /db_xref="GeneID:852575"	746324..747766	2	TRUE	20746324	20747766	2
	1123	chr2_ref v2	UBX7	Gene	complement(748024..749334)	/gene="UBX7"; /locus_tag="YBR273C"; /synonym="CUI3"; /db_xref="GeneID:852576"	748024..749334	2	TRUE	20748024	20749334	2
	1125	chr2_ref v2	CHK1	Gene	749557..751140	/gene="CHK1"; /locus_tag="YBR274W"; /db_xref="GeneID:852577"	749557..751140	2	FALSE	20749557	20751140	2
	1127	chr2_ref v2	RIF1	Gene	complement(751319..757069)	/gene="RIF1"; /locus_tag="YBR275C"; /db_xref="GeneID:852578"	751319..757069	2	TRUE	20751319	20757069	2
	1130	chr2_ref v2	PPS1	Gene	complement(757583..760006)	/gene="PPS1"; /locus_tag="YBR276C"; /db_xref="GeneID:852579"	757583..760006	2	TRUE	20757583	20760006	2
	1132	chr2_ref v2	DPB3	Gene	760257..760862	/gene="DPB3"; /locus_tag="YBR278W"; /db_xref="GeneID:852580"	760257..760862	2	FALSE	20760257	20760862	2
	1134	chr2_ref v2	PAF1	Gene	761223..762560	/gene="PAF1"; /locus_tag="YBR279W"; /db_xref="GeneID:852582"	761223..762560	2	FALSE	20761223	20762560	2
	1136	chr2_ref v2	SAF1	Gene	complement(762750..764663)	/gene="SAF1"; /locus_tag="YBR280C"; /db_xref="GeneID:852583"	762750..764663	2	TRUE	20762750	20764663	2
	1138	chr2_ref v2	DUG2	Gene	complement(764936..767572)	/gene="DUG2"; /locus_tag="YBR281C"; /db_xref="GeneID:852584"	764936..767572	2	TRUE	20764936	20767572	2
	1140	chr2_ref v2	MRPL27	Gene	768205..768645	/gene="MRPL27"; /locus_tag="YBR282W"; /db_xref="GeneID:852585"	768205..768645	2	FALSE	20768205	20768645	2
	1142	chr2_ref v2	SSH1	Gene	complement(768908..770380)	/gene="SSH1"; /locus_tag="YBR283C"; /db_xref="GeneID:852586"	768908..770380	2	TRUE	20768908	20770380	2
	1144	chr2_ref v2	Gene	Gene	771204..773597	/locus_tag="YBR284W"; /db_xref="GeneID:852587"	771204..773597	2	FALSE	20771204	20773597	2
	1146	chr2_ref v2	Gene	Gene	773887..774321	/locus_tag="YBR285W"; /db_xref="GeneID:852588"	773887..774321	2	FALSE	20773887	20774321	2
	1149	chr2_ref v2	APE3	Gene	774665..776278	/gene="APE3"; /locus_tag="YBR286W"; /synonym="APY1"; /db_xref="GeneID:852589"	774665..776278	2	FALSE	20774665	20776278	2
	1151	chr2_ref v2	Gene	Gene	776536..777819	/locus_tag="YBR287W"; /db_xref="GeneID:852590"	776536..777819	2	FALSE	20776536	20777819	2
	1153	chr2_ref v2	APM3	Gene	complement(777977..779428)	/gene="APM3"; /locus_tag="YBR288C"; /synonym="YKS6"; /db_xref="GeneID:852591"	777977..779428	2	TRUE	20777977	20779428	2
	1155	chr2_ref v2	SNF5	Gene	779632..782349	/gene="SNF5"; /locus_tag="YBR289W"; /synonym="TYE4, SWI10, HAF4"; /db_xref="GeneID:852592"	779632..782349	2	FALSE	20779632	20782349	2
	1157	chr2_ref v2	BSD2	Gene	782556..783521	/gene="BSD2"; /locus_tag="YBR290W"; /db_xref="GeneID:852593"	782556..783521	2	FALSE	20782556	20783521	2
	1159	chr2_ref v2	CTP1	Gene	complement(783638..784537)	/gene="CTP1"; /locus_tag="YBR291C"; /db_xref="GeneID:852594"	783638..784537	2	TRUE	20783638	20784537	2
	1161	chr2_ref v2	VBA2	Gene	786971..788395	/gene="VBA2"; /locus_tag="YBR293W"; /db_xref="GeneID:852596"	786971..788395	2	FALSE	20786971	20788395	2
	1163	chr2_ref v2	SUL1	Gene	789200..791779	/gene="SUL1"; /locus_tag="YBR294W"; /synonym="SFP2"; /db_xref="GeneID:852597"	789200..791779	2	FALSE	20789200	20791779	2
	1166	chr2_ref v2	PCA1	Gene	792814..796464	/gene="PCA1"; /locus_tag="YBR295W"; /synonym="PAY2, CAD2"; /db_xref="GeneID:852598"	792814..796464	2	FALSE	20792814	20796464	2
	1169	chr2_ref v2	PHO89	Gene	complement(796763..798487)	/gene="PHO89"; /locus_tag="YBR296C"; /synonym="ITN1"; /db_xref="GeneID:852599"	796763..798487	2	TRUE	20796763	20798487	2
	1171	chr2_ref v2	Gene	Gene	complement(800088..800207)	/locus_tag="YBR296C-A"; /db_xref="GeneID:1466451"	800088..800207	2	TRUE	20800088	20800207	2
	1173	chr2_ref v2	MAL33	Gene	800488..801894	/gene="MAL33"; /locus_tag="YBR297W"; /db_xref="GeneID:852600"	800488..801894	2	FALSE	20800488	20801894	2
	1176	chr2_ref v2	MAL31	Gene	complement(802596..804440)	/gene="MAL31"; /locus_tag="YBR298C"; /db_xref="GeneID:852601"	802596..804440	2	TRUE	20802596	20804440	2
	1178	chr2_ref v2	Gene	Gene	complement(805000..805221)	/locus_tag="YBR298C-A"; /db_xref="GeneID:1466452"	805000..805221	2	TRUE	20805000	20805221	2
	1180	chr2_ref v2	MAL32	Gene	805316..807070	/gene="MAL32"; /locus_tag="YBR299W"; /db_xref="GeneID:852602"	805316..807070	2	FALSE	20805316	20807070	2
	1182	chr2_ref v2	DAN3	Gene	809022..809384	/gene="DAN3"; /locus_tag="YBR301W"; /db_xref="GeneID:852603"	809022..809384	2	FALSE	20809022	20809384	2
	1184	chr2_ref v2	COS2	Gene	complement(810305..811444)	/gene="COS2"; /locus_tag="YBR302C"; /db_xref="GeneID:852605"	810305..811444	2	TRUE	20810305	20811444	2
	1197	chr3_ref v2	Gene	Gene	2019..2457	/locus_tag="YCL075W"; /inference="non-experimental evidence, no additional details recorded"; /pseudo; /db_xref="GeneID:850287"; /db_xref="SGD:S000000580"	2019..2457	3	FALSE	30002019	30002457	2
	1198	chr3_ref v2	Gene	Gene	2715..3640	/locus_tag="YCL074W"; /inference="non-experimental evidence, no additional details recorded"; /pseudo; /db_xref="GeneID:850288"; /db_xref="SGD:S000000579"	2715..3640	3	FALSE	30002715	30003640	2
	1201	chr3_ref v2	Gene	Gene	complement(6326..8153)	/locus_tag="YCL073C"; /db_xref="GeneID:850289"	6326..8153	3	TRUE	30006326	30008153	2
	1203	chr3_ref v2	VBA3	Gene	9532..10908	/gene="VBA3"; /locus_tag="YCL069W"; /db_xref="GeneID:850290"	9532..10908	3	FALSE	30009532	30010908	2
	1207	chr3_ref v2	Gene	Gene	complement(11329..12111)	/locus_tag="YCL068C"; /db_xref="GeneID:850291"	11329..12111	3	TRUE	30011329	30012111	2
	1209	chr3_ref v2	HMLALPHA2	Gene	complement(12212..12844)	/gene="HMLALPHA2"; /locus_tag="YCL067C"; /gene_synonym="ALPHA2"; /db_xref="GeneID:850292"	12212..12844	3	TRUE	30012212	30012844	2
	1211	chr3_ref v2	HMLALPHA1	Gene	13108..13635	/gene="HMLALPHA1"; /locus_tag="YCL066W"; /gene_synonym="ALPHA1"; /db_xref="GeneID:850293"	13108..13635	3	FALSE	30013108	30013635	2
	1216	chr3_ref v2	CHA1	Gene	complement(15613..16695)	/gene="CHA1"; /locus_tag="YCL064C"; /db_xref="GeneID:850295"	15613..16695	3	TRUE	30015613	30016695	2
	1218	chr3_ref v2	VAC17	Gene	17104..18381	/gene="VAC17"; /locus_tag="YCL063W"; /gene_synonym="YCL062W"; /db_xref="GeneID:850296"	17104..18381	3	FALSE	30017104	30018381	2
	1220	chr3_ref v2	MRC1	Gene	complement(18636..21923)	/gene="MRC1"; /locus_tag="YCL061C"; /gene_synonym="YCL060C"; /db_xref="GeneID:850297"	18636..21923	3	TRUE	30018636	30021923	2
	1222	chr3_ref v2	KRR1	Gene	complement(22248..23198)	/gene="KRR1"; /locus_tag="YCL059C"; /db_xref="GeneID:850298"	22248..23198	3	TRUE	30022248	30023198	2
	1224	chr3_ref v2	Gene	Gene	23403..23744	/locus_tag="YCL058W-A"; /db_xref="GeneID:3289591"	23403..23744	3	FALSE	30023403	30023744	2
	1226	chr3_ref v2	Gene	Gene	complement(23851..24144)	/locus_tag="YCL057C-A"; /db_xref="GeneID:850300"	23851..24144	3	TRUE	30023851	30024144	2
	1228	chr3_ref v2	PRD1	Gene	24587..26725	/gene="PRD1"; /locus_tag="YCL057W"; /db_xref="GeneID:850301"	24587..26725	3	FALSE	30024587	30026725	2
	1230	chr3_ref v2	Gene	Gene	complement(26744..27178)	/locus_tag="YCL056C"; /db_xref="GeneID:850302"	26744..27178	3	TRUE	30026744	30027178	2
	1232	chr3_ref v2	KAR4	Gene	27748..28755	/gene="KAR4"; /locus_tag="YCL055W"; /db_xref="GeneID:850303"	27748..28755	3	FALSE	30027748	30028755	2
	1235	chr3_ref v2	SPB1	Gene	31269..33794	/gene="SPB1"; /locus_tag="YCL054W"; /db_xref="GeneID:850304"	31269..33794	3	FALSE	30031269	30033794	2
	1237	chr3_ref v2	PBN1	Gene	complement(33963..35213)	/gene="PBN1"; /locus_tag="YCL052C"; /db_xref="GeneID:850305"	33963..35213	3	TRUE	30033963	30035213	2
	1239	chr3_ref v2	LRE1	Gene	35685..37436	/gene="LRE1"; /locus_tag="YCL051W"; /db_xref="GeneID:850306"	35685..37436	3	FALSE	30035685	30037436	2
	1241	chr3_ref v2	APA1	Gene	complement(37658..38623)	/gene="APA1"; /locus_tag="YCL050C"; /gene_synonym="DTP1"; /db_xref="GeneID:850307"	37658..38623	3	TRUE	30037658	30038623	2
	1244	chr3_ref v2	Gene	Gene	complement(39609..40547)	/locus_tag="YCL049C"; /db_xref="GeneID:850308"	39609..40547	3	TRUE	30039609	30040547	2
	1246	chr3_ref v2	Gene	Gene	41313..41552	/locus_tag="YCL048W-A"; /db_xref="GeneID:3799968"	41313..41552	3	FALSE	30041313	30041552	2
	1248	chr3_ref v2	SPS22	Gene	41990..43381	/gene="SPS22"; /locus_tag="YCL048W"; /db_xref="GeneID:850309"	41990..43381	3	FALSE	30041990	30043381	2
	1250	chr3_ref v2	Gene	Gene	complement(43488..44264)	/locus_tag="YCL047C"; /db_xref="GeneID:850310"	43488..44264	3	TRUE	30043488	30044264	2
	1252	chr3_ref v2	Gene	Gene	complement(44450..46732)	/locus_tag="YCL045C"; /db_xref="GeneID:850312"	44450..46732	3	TRUE	30044450	30046732	2
	1254	chr3_ref v2	MGR1	Gene	complement(46938..48191)	/gene="MGR1"; /locus_tag="YCL044C"; /db_xref="GeneID:850313"	46938..48191	3	TRUE	30046938	30048191	2
	1256	chr3_ref v2	PDI1	Gene	complement(48481..50049)	/gene="PDI1"; /locus_tag="YCL043C"; /gene_synonym="MFP1; TRG1"; /db_xref="GeneID:850314"	48481..50049	3	TRUE	30048481	30050049	2
	1258	chr3_ref v2	Gene	Gene	50412..50771	/locus_tag="YCL042W"; /db_xref="GeneID:850315"	50412..50771	3	FALSE	30050412	30050771	2
	1260	chr3_ref v2	GLK1	Gene	50666..52168	/gene="GLK1"; /locus_tag="YCL040W"; /gene_synonym="HOR3"; /db_xref="GeneID:850317"	50666..52168	3	FALSE	30050666	30052168	2
	1262	chr3_ref v2	GID7	Gene	52473..54710	/gene="GID7"; /locus_tag="YCL039W"; /gene_synonym="MOH2"; /db_xref="GeneID:850318"	52473..54710	3	FALSE	30052473	30054710	2
	1264	chr3_ref v2	ATG22	Gene	complement(54769..56355)	/gene="ATG22"; /locus_tag="YCL038C"; /gene_synonym="AUT4"; /db_xref="GeneID:850319"	54769..56355	3	TRUE	30054769	30056355	2
	1266	chr3_ref v2	SRO9	Gene	complement(57202..58506)	/gene="SRO9"; /locus_tag="YCL037C"; /db_xref="GeneID:850320"	57202..58506	3	TRUE	30057202	30058506	2
	1268	chr3_ref v2	GFD2	Gene	58854..60554	/gene="GFD2"; /locus_tag="YCL036W"; /db_xref="GeneID:850321"	58854..60554	3	FALSE	30058854	30060554	2
	1270	chr3_ref v2	GRX1	Gene	complement(60669..61001)	/gene="GRX1"; /locus_tag="YCL035C"; /db_xref="GeneID:850322"	60669..61001	3	TRUE	30060669	30061001	2
	1272	chr3_ref v2	LSB5	Gene	61486..62550	/gene="LSB5"; /locus_tag="YCL034W"; /db_xref="GeneID:850323"	61486..62550	3	FALSE	30061486	30062550	2
	1274	chr3_ref v2	Gene	Gene	complement(62604..63110)	/locus_tag="YCL033C"; /db_xref="GeneID:850324"	62604..63110	3	TRUE	30062604	30063110	2
	1276	chr3_ref v2	STE50	Gene	63269..64309	/gene="STE50"; /locus_tag="YCL032W"; /db_xref="GeneID:850325"	63269..64309	3	FALSE	30063269	30064309	2
	1278	chr3_ref v2	RRP7	Gene	complement(64503..65396)	/gene="RRP7"; /locus_tag="YCL031C"; /db_xref="GeneID:850326"	64503..65396	3	TRUE	30064503	30065396	2
	1280	chr3_ref v2	HIS4	Gene	complement(65762..68161)	/gene="HIS4"; /locus_tag="YCL030C"; /db_xref="GeneID:850327"	65762..68161	3	TRUE	30065762	30068161	2
	1282	chr3_ref v2	BIK1	Gene	complement(68427..69749)	/gene="BIK1"; /locus_tag="YCL029C"; /gene_synonym="ARM5; PAC14"; /db_xref="GeneID:850328"	68427..69749	3	TRUE	30068427	30069749	2
	1284	chr3_ref v2	RNQ1	Gene	69978..71195	/gene="RNQ1"; /locus_tag="YCL028W"; /db_xref="GeneID:850329"	69978..71195	3	FALSE	30069978	30071195	2
	1286	chr3_ref v2	FUS1	Gene	71631..73169	/gene="FUS1"; /locus_tag="YCL027W"; /db_xref="GeneID:850330"	71631..73169	3	FALSE	30071631	30073169	2
	1288	chr3_ref v2	HBN1	Gene	complement(73233..73814)	/gene="HBN1"; /locus_tag="YCL026C-B"; /gene_synonym="YCL027C-A"; /db_xref="GeneID:850331"	73233..73814	3	TRUE	30073233	30073814	2
	1291	chr3_ref v2	FRM2	Gene	complement(74532..75113)	/gene="FRM2"; /locus_tag="YCL026C-A"; /gene_synonym="YCLX08C"; /db_xref="GeneID:850332"	74532..75113	3	TRUE	30074532	30075113	2
	1296	chr3_ref v2	URA3	Gene	76347..77150		76347..77150	3	FALSE	30076347	30077150	2
	1299	chr3_ref v2	KCC4	Gene	79043..82156	/gene="KCC4"; /locus_tag="YCL024W"; /db_xref="GeneID:850334"	79043..82156	3	FALSE	30079043	30082156	2
	1300	chr3_ref v2	Gene	Gene	complement(82343..82414)	/locus_tag="TE(UUC)C"; /db_xref="GeneID:850337"	82343..82414	3	TRUE	30082343	30082414	2
	1304	chr3_ref v2	Gene	Gene	83501..83878	/locus_tag="YCL021W-A"; /db_xref="GeneID:850338"	83501..83878	3	FALSE	30083501	30083878	2
	1311	chr3_ref v2	Gene	Gene	84983..86299	/locus_tag="YCL020W"; /db_xref="GeneID:850339"	84983..86299	3	FALSE	30084983	30086299	2
	1312	chr3_ref v2	Gene	Gene	84983..90296	/locus_tag="YCL019W"; /db_xref="GeneID:850340"	84983..90296	3	FALSE	30084983	30090296	2
	1316	chr3_ref v2	SUP53	Gene	90740..90853	/gene="SUP53"; /locus_tag="TL(CAA)C"; /db_xref="GeneID:850341"	90740..90853	3	FALSE	30090740	30090853	2
	1321	chr3_ref v2	LEU2	Gene	90916..90973	/gene="LEU2"; /locus_tag="YCL018W"; /db_xref="GeneID:850342"	90916..90973	3	FALSE	30090916	30090973	2
	1323	chr3_ref v2	NFS1	Gene	complement(91122..92615)	/gene="NFS1"; /locus_tag="YCL017C"; /gene_synonym="SPL1"; /db_xref="GeneID:850343"	91122..92615	3	TRUE	30091122	30092615	2
	1325	chr3_ref v2	DCC1	Gene	complement(92966..94108)	/gene="DCC1"; /locus_tag="YCL016C"; /db_xref="GeneID:850344"	92966..94108	3	TRUE	30092966	30094108	2
	1327	chr3_ref v2	BUD3	Gene	94626..99536	/gene="BUD3"; /locus_tag="YCL014W"; /gene_synonym="YCL012W"; /db_xref="GeneID:850345"	94626..99536	3	FALSE	30094626	30099536	2
	1328	chr3_ref v2	Gene	Gene	complement(99662..100133)	/locus_tag="YCL012C"; /gene_synonym="YCL011C-A"; /db_xref="GeneID:2746859"	99662..100133	3	TRUE	30099662	30100133	2
	1332	chr3_ref v2	GBP2	Gene	complement(100420..101703)	/gene="GBP2"; /locus_tag="YCL011C"; /gene_synonym="RLF6"; /db_xref="GeneID:850346"	100420..101703	3	TRUE	30100420	30101703	2
	1334	chr3_ref v2	SGF29	Gene	complement(101916..102695)	/gene="SGF29"; /locus_tag="YCL010C"; /db_xref="GeneID:850347"	101916..102695	3	TRUE	30101916	30102695	2
	1336	chr3_ref v2	ILV6	Gene	complement(102964..103893)	/gene="ILV6"; /locus_tag="YCL009C"; /db_xref="GeneID:850348"	102964..103893	3	TRUE	30102964	30103893	2
	1338	chr3_ref v2	STP22	Gene	complement(104041..105198)	/gene="STP22"; /locus_tag="YCL008C"; /gene_synonym="VPS23"; /db_xref="GeneID:850349"	104041..105198	3	TRUE	30104041	30105198	2
	1339	chr3_ref v2	VMA9	Gene	105368..105762	/gene="VMA9"; /locus_tag="YCL005W-A"; /gene_synonym="CWH36; LDB10"; /db_xref="GeneID:2732686"	105368..105762	3	FALSE	30105368	30105762	2
	1345	chr3_ref v2	LDB16	Gene	106366..107136	/gene="LDB16"; /locus_tag="YCL005W"; /db_xref="GeneID:850351"	106366..107136	3	FALSE	30106366	30107136	2
	1348	chr3_ref v2	PGS1	Gene	107450..109015	/gene="PGS1"; /locus_tag="YCL004W"; /gene_synonym="PEL1; YCL003W"; /db_xref="GeneID:850352"	107450..109015	3	FALSE	30107450	30109015	2
	1349	chr3_ref v2	Gene	Gene	complement(109188..110020)	/locus_tag="YCL002C"; /db_xref="GeneID:850353"	109188..110020	3	TRUE	30109188	30110020	2
	1353	chr3_ref v2	RER1	Gene	110261..110827	/gene="RER1"; /locus_tag="YCL001W"; /db_xref="GeneID:850354"	110261..110827	3	FALSE	30110261	30110827	2
	1355	chr3_ref v2	Gene	Gene	111425..111886	/locus_tag="YCL001W-A"; /db_xref="GeneID:850355"	111425..111886	3	FALSE	30111425	30111886	2
	1357	chr3_ref v2	Gene	Gene	112115..112369	/locus_tag="YCL001W-B"; /db_xref="GeneID:850356"	112115..112369	3	FALSE	30112115	30112369	2
	1364	chr3_ref v2	CDC10	Gene	complement(115725..116693)	/gene="CDC10"; /locus_tag="YCR002C"; /db_xref="GeneID:850358"	115725..116693	3	TRUE	30115725	30116693	2
	1366	chr3_ref v2	MRPL32	Gene	116965..117516	/gene="MRPL32"; /locus_tag="YCR003W"; /db_xref="GeneID:850359"	116965..117516	3	FALSE	30116965	30117516	2
	1368	chr3_ref v2	YCP4	Gene	complement(117920..118663)	/gene="YCP4"; /locus_tag="YCR004C"; /db_xref="GeneID:850360"	117920..118663	3	TRUE	30117920	30118663	2
	1370	chr3_ref v2	CIT2	Gene	complement(119291..120673)	/gene="CIT2"; /locus_tag="YCR005C"; /db_xref="GeneID:850361"	119291..120673	3	TRUE	30119291	30120673	2
	1371	chr3_ref v2	SUF2	Gene	complement(121922..121993)	/gene="SUF2"; /locus_tag="TP(AGG)C"; /db_xref="GeneID:850363"	121922..121993	3	TRUE	30121922	30121993	2
	1375	chr3_ref v2	Gene	Gene	complement(124356..125075)	/locus_tag="YCR007C"; /db_xref="GeneID:850364"	124356..125075	3	TRUE	30124356	30125075	2
	1376	chr3_ref v2	Gene	Gene	126061..126134	/locus_tag="TN(GUU)C"; /db_xref="GeneID:850365"	126061..126134	3	FALSE	30126061	30126134	2
	1379	chr3_ref v2	SAT4	Gene	126815..128626	/gene="SAT4"; /locus_tag="YCR008W"; /gene_synonym="HAL4"; /db_xref="GeneID:850366"	126815..128626	3	FALSE	30126815	30128626	2
	1381	chr3_ref v2	RVS161	Gene	complement(129090..129887)	/gene="RVS161"; /locus_tag="YCR009C"; /gene_synonym="END6; FUS7; SPE161"; /db_xref="GeneID:850367"	129090..129887	3	TRUE	30129090	30129887	2
	1384	chr3_ref v2	ADY2	Gene	complement(130618..131469)	/gene="ADY2"; /locus_tag="YCR010C"; /gene_synonym="ATO1"; /db_xref="GeneID:850368"	130618..131469	3	TRUE	30130618	30131469	2
	1386	chr3_ref v2	ADP1	Gene	complement(132069..135218)	/gene="ADP1"; /locus_tag="YCR011C"; /db_xref="GeneID:850369"	132069..135218	3	TRUE	30132069	30135218	2
	1388	chr3_ref v2	PGK1	Gene	136091..137341	/gene="PGK1"; /locus_tag="YCR012W"; /db_xref="GeneID:850370"	136091..137341	3	FALSE	30136091	30137341	2
	1390	chr3_ref v2	POL4	Gene	complement(137530..139278)	/gene="POL4"; /locus_tag="YCR014C"; /db_xref="GeneID:850372"	137530..139278	3	TRUE	30137530	30139278	2
	1392	chr3_ref v2	Gene	Gene	complement(139562..140515)	/locus_tag="YCR015C"; /db_xref="GeneID:850373"	139562..140515	3	TRUE	30139562	30140515	2
	1394	chr3_ref v2	SUF16	Gene	complement(141046..141116)	/gene="SUF16"; /locus_tag="TG(GCC)C"; /db_xref="GeneID:850374"	141046..141116	3	TRUE	30141046	30141116	2
	1398	chr3_ref v2	Gene	Gene	141979..142851	/locus_tag="YCR016W"; /db_xref="GeneID:850375"	141979..142851	3	FALSE	30141979	30142851	2
	1400	chr3_ref v2	CWH43	Gene	complement(143118..145979)	/gene="CWH43"; /locus_tag="YCR017C"; /db_xref="GeneID:850376"	143118..145979	3	TRUE	30143118	30145979	2
	1402	chr3_ref v2	SRD1	Gene	complement(146583..146963)	/gene="SRD1"; /locus_tag="YCR018C"; /db_xref="GeneID:850377"	146583..146963	3	TRUE	30146583	30146963	2
	1404	chr3_ref v2	Gene	Gene	147164..147228	/locus_tag="TM(CAU)C"; /db_xref="GeneID:850378"	147164..147228	3	FALSE	30147164	30147228	2
	1407	chr3_ref v2	Gene	Gene	complement(147262..147334)	/locus_tag="TK(CUU)C"; /db_xref="GeneID:850379"	147262..147334	3	TRUE	30147262	30147334	2
	1411	chr3_ref v2	MAK32	Gene	148665..149756	/gene="MAK32"; /locus_tag="YCR019W"; /db_xref="GeneID:850381"	148665..149756	3	FALSE	30148665	30149756	2
	1413	chr3_ref v2	PET18	Gene	complement(149840..150487)	/gene="PET18"; /locus_tag="YCR020C"; /gene_synonym="HIT2"; /db_xref="GeneID:850382"	149840..150487	3	TRUE	30149840	30150487	2
	1415	chr3_ref v2	MAK31	Gene	complement(150658..150924)	/gene="MAK31"; /locus_tag="YCR020C-A"; /gene_synonym="LSM9; SMX1"; /db_xref="GeneID:850383"	150658..150924	3	TRUE	30150658	30150924	2
	1417	chr3_ref v2	HTL1	Gene	151148..151384	/gene="HTL1"; /locus_tag="YCR020W-B"; /db_xref="GeneID:850384"	151148..151384	3	FALSE	30151148	30151384	2
	1419	chr3_ref v2	HSP30	Gene	complement(151937..152935)	/gene="HSP30"; /locus_tag="YCR021C"; /gene_synonym="YRO1"; /db_xref="GeneID:850385"	151937..152935	3	TRUE	30151937	30152935	2
	1421	chr3_ref v2	Gene	Gene	complement(154366..156201)	/locus_tag="YCR023C"; /db_xref="GeneID:850387"	154366..156201	3	TRUE	30154366	30156201	2
	1423	chr3_ref v2	SLM5	Gene	complement(156572..158050)	/gene="SLM5"; /locus_tag="YCR024C"; /db_xref="GeneID:850388"	156572..158050	3	TRUE	30156572	30158050	2
	1425	chr3_ref v2	Gene	Gene	complement(158427..158692)	/locus_tag="YCR024C-B"; /db_xref="GeneID:1466398"	158427..158692	3	TRUE	30158427	30158692	2
	1427	chr3_ref v2	PMP1	Gene	complement(158772..158894)	/gene="PMP1"; /locus_tag="YCR024C-A"; /db_xref="GeneID:850389"	158772..158894	3	TRUE	30158772	30158894	2
	1429	chr3_ref v2	NPP1	Gene	complement(159940..162168)	/gene="NPP1"; /locus_tag="YCR026C"; /db_xref="GeneID:850391"	159940..162168	3	TRUE	30159940	30162168	2
	1432	chr3_ref v2	RHB1	Gene	complement(163199..163828)	/gene="RHB1"; /locus_tag="YCR027C"; /gene_synonym="RSG1"; /db_xref="GeneID:850392"	163199..163828	3	TRUE	30163199	30163828	2
	1433	chr3_ref v2	Gene	Gene	complement(164130..164201)	/locus_tag="TQ(UUG)C"; /db_xref="GeneID:850393"	164130..164201	3	TRUE	30164130	30164201	2
	1437	chr3_ref v2	FEN2	Gene	complement(166715..168253)	/gene="FEN2"; /locus_tag="YCR028C"; /db_xref="GeneID:850394"	166715..168253	3	TRUE	30166715	30168253	2
	1438	chr3_ref v2	RIM1	Gene	complement(168779..169269)	/gene="RIM1"; /locus_tag="YCR028C-A"; /db_xref="GeneID:850395"	168779..169269	3	TRUE	30168779	30169269	2
	1442	chr3_ref v2	SYP1	Gene	complement(169655..172267)	/gene="SYP1"; /locus_tag="YCR030C"; /gene_synonym="YCR029C-A"; /db_xref="GeneID:850396"	169655..172267	3	TRUE	30169655	30172267	2
	1444	chr3_ref v2	RPS14A	Gene	complement(173329..174049)	/gene="RPS14A"; /locus_tag="YCR031C"; /gene_synonym="CRY1; RPL59"; /db_xref="GeneID:850397"	173329..174049	3	TRUE	30173329	30174049	2
	1449	chr3_ref v2	BPH1	Gene	175349..181852	/gene="BPH1"; /locus_tag="YCR032W"; /db_xref="GeneID:850398"	175349..181852	3	FALSE	30175349	30181852	2
	1451	chr3_ref v2	SNT1	Gene	182318..185998	/gene="SNT1"; /locus_tag="YCR033W"; /db_xref="GeneID:850399"	182318..185998	3	FALSE	30182318	30185998	2
	1453	chr3_ref v2	FEN1	Gene	186421..187464	/gene="FEN1"; /locus_tag="YCR034W"; /gene_synonym="ELO2; GNS1; VBM2"; /db_xref="GeneID:850400"	186421..187464	3	FALSE	30186421	30187464	2
	1455	chr3_ref v2	RRP43	Gene	complement(187663..188847)	/gene="RRP43"; /locus_tag="YCR035C"; /db_xref="GeneID:850401"	187663..188847	3	TRUE	30187663	30188847	2
	1457	chr3_ref v2	RBK1	Gene	189126..190127	/gene="RBK1"; /locus_tag="YCR036W"; /db_xref="GeneID:850402"	189126..190127	3	FALSE	30189126	30190127	2
	1460	chr3_ref v2	PHO87	Gene	complement(190243..193014)	/gene="PHO87"; /locus_tag="YCR037C"; /db_xref="GeneID:850403"	190243..193014	3	TRUE	30190243	30193014	2
	1463	chr3_ref v2	BUD5	Gene	complement(193450..195378)	/gene="BUD5"; /locus_tag="YCR038C"; /db_xref="GeneID:850405"	193450..195378	3	TRUE	30193450	30195378	2
	1466	chr3_ref v2	MATALPHA2	Gene	complement(195375..196007)	/gene="MATALPHA2"; /locus_tag="YCR039C"; /gene_synonym="ALPHA2"; /db_xref="GeneID:850406"	195375..196007	3	TRUE	30195375	30196007	2
	1468	chr3_ref v2	MATALPHA1	Gene	196271..196798	/gene="MATALPHA1"; /locus_tag="YCR040W"; /gene_synonym="ALPHA1"; /db_xref="GeneID:850407"	196271..196798	3	FALSE	30196271	30196798	2
	1470	chr3_ref v2	TAF2	Gene	complement(197003..201226)	/gene="TAF2"; /locus_tag="YCR042C"; /gene_synonym="TAF150; TSM1"; /db_xref="GeneID:850409"	197003..201226	3	TRUE	30197003	30201226	2
	1473	chr3_ref v2	Gene	Gene	complement(202090..202473)	/locus_tag="YCR043C"; /db_xref="GeneID:850410"	202090..202473	3	TRUE	30202090	30202473	2
	1475	chr3_ref v2	PER1	Gene	complement(202707..203780)	/gene="PER1"; /locus_tag="YCR044C"; /gene_synonym="COS16"; /db_xref="GeneID:850411"	202707..203780	3	TRUE	30202707	30203780	2
	1477	chr3_ref v2	Gene	Gene	complement(203965..205440)	/locus_tag="YCR045C"; /db_xref="GeneID:850412"	203965..205440	3	TRUE	30203965	30205440	2
	1479	chr3_ref v2	IMG1	Gene	complement(205744..206253)	/gene="IMG1"; /locus_tag="YCR046C"; /db_xref="GeneID:850413"	205744..206253	3	TRUE	30205744	30206253	2
	1481	chr3_ref v2	BUD23	Gene	complement(206548..207375)	/gene="BUD23"; /locus_tag="YCR047C"; /db_xref="GeneID:850414"	206548..207375	3	TRUE	30206548	30207375	2
	1483	chr3_ref v2	ARE1	Gene	207759..209591	/gene="ARE1"; /locus_tag="YCR048W"; /gene_synonym="SAT2"; /db_xref="GeneID:850415"	207759..209591	3	FALSE	30207759	30209591	2
	1485	chr3_ref v2	Gene	Gene	complement(209294..209602)	/locus_tag="YCR050C"; /db_xref="GeneID:850417"	209294..209602	3	TRUE	30209294	30209602	2
	1487	chr3_ref v2	Gene	Gene	209901..210569	/locus_tag="YCR051W"; /db_xref="GeneID:850418"	209901..210569	3	FALSE	30209901	30210569	2
	1489	chr3_ref v2	RSC6	Gene	210824..212275	/gene="RSC6"; /locus_tag="YCR052W"; /db_xref="GeneID:850419"	210824..212275	3	FALSE	30210824	30212275	2
	1492	chr3_ref v2	THR4	Gene	212527..214071	/gene="THR4"; /locus_tag="YCR053W"; /db_xref="GeneID:850420"	212527..214071	3	FALSE	30212527	30214071	2
	1494	chr3_ref v2	CTR86	Gene	complement(214206..215897)	/gene="CTR86"; /locus_tag="YCR054C"; /db_xref="GeneID:850421"	214206..215897	3	TRUE	30214206	30215897	2
	1496	chr3_ref v2	PWP2	Gene	complement(216287..219058)	/gene="PWP2"; /locus_tag="YCR057C"; /gene_synonym="UTP1; YCR055C; YCR058C"; /db_xref="GeneID:850422"	216287..219058	3	TRUE	30216287	30219058	2
	1498	chr3_ref v2	YIH1	Gene	complement(219284..220060)	/gene="YIH1"; /locus_tag="YCR059C"; /db_xref="GeneID:850423"	219284..220060	3	TRUE	30219284	30220060	2
	1500	chr3_ref v2	TAH1	Gene	220229..220564	/gene="TAH1"; /locus_tag="YCR060W"; /db_xref="GeneID:850424"	220229..220564	3	FALSE	30220229	30220564	2
	1503	chr3_ref v2	Gene	Gene	221393..223288	/locus_tag="YCR061W"; /gene_synonym="YCR062W"; /db_xref="GeneID:850425"	221393..223288	3	FALSE	30221393	30223288	2
	1504	chr3_ref v2	SUP61	Gene	223772..223872	/gene="SUP61"; /locus_tag="TS(CGA)C"; /db_xref="GeneID:850426"	223772..223872	3	FALSE	30223772	30223872	2
	1508	chr3_ref v2	BUD31	Gene	224148..224621	/gene="BUD31"; /locus_tag="YCR063W"; /gene_synonym="CWC14"; /db_xref="GeneID:850427"	224148..224621	3	FALSE	30224148	30224621	2
	1510	chr3_ref v2	HCM1	Gene	225140..226834	/gene="HCM1"; /locus_tag="YCR065W"; /db_xref="GeneID:850429"	225140..226834	3	FALSE	30225140	30226834	2
	1512	chr3_ref v2	RAD18	Gene	227330..228793	/gene="RAD18"; /locus_tag="YCR066W"; /db_xref="GeneID:850430"	227330..228793	3	FALSE	30227330	30228793	2
	1514	chr3_ref v2	SED4	Gene	complement(228955..232152)	/gene="SED4"; /locus_tag="YCR067C"; /db_xref="GeneID:850431"	228955..232152	3	TRUE	30228955	30232152	2
	1516	chr3_ref v2	ATG15	Gene	233044..234606	/gene="ATG15"; /locus_tag="YCR068W"; /gene_synonym="AUT5; CVT17"; /db_xref="GeneID:850432"	233044..234606	3	FALSE	30233044	30234606	2
	1518	chr3_ref v2	CPR4	Gene	234885..235841	/gene="CPR4"; /locus_tag="YCR069W"; /gene_synonym="CYP4; SCC3; YCR070W"; /db_xref="GeneID:850433"	234885..235841	3	FALSE	30234885	30235841	2
	1520	chr3_ref v2	IMG2	Gene	complement(235933..236373)	/gene="IMG2"; /locus_tag="YCR071C"; /db_xref="GeneID:850434"	235933..236373	3	TRUE	30235933	30236373	2
	1522	chr3_ref v2	RSA4	Gene	complement(236635..238182)	/gene="RSA4"; /locus_tag="YCR072C"; /db_xref="GeneID:850435"	236635..238182	3	TRUE	30236635	30238182	2
	1524	chr3_ref v2	SSK22	Gene	complement(238419..242414)	/gene="SSK22"; /locus_tag="YCR073C"; /db_xref="GeneID:850436"	238419..242414	3	TRUE	30238419	30242414	2
	1526	chr3_ref v2	SOL2	Gene	242794..243741	/gene="SOL2"; /locus_tag="YCR073W-A"; /gene_synonym="YCRX13W"; /db_xref="GeneID:850437"	242794..243741	3	FALSE	30242794	30243741	2
	1528	chr3_ref v2	ERS1	Gene	complement(243864..244646)	/gene="ERS1"; /locus_tag="YCR075C"; /db_xref="GeneID:850438"	243864..244646	3	TRUE	30243864	30244646	2
	1530	chr3_ref v2	Gene	Gene	244806..245033	/locus_tag="YCR075W-A"; /db_xref="GeneID:1466399"	244806..245033	3	FALSE	30244806	30245033	2
	1532	chr3_ref v2	Gene	Gene	complement(245124..245876)	/locus_tag="YCR076C"; /db_xref="GeneID:850439"	245124..245876	3	TRUE	30245124	30245876	2
	1534	chr3_ref v2	PAT1	Gene	complement(246069..248459)	/gene="PAT1"; /locus_tag="YCR077C"; /gene_synonym="MRT1"; /db_xref="GeneID:850440"	246069..248459	3	TRUE	30246069	30248459	2
	1536	chr3_ref v2	PTC6	Gene	248676..250004	/gene="PTC6"; /locus_tag="YCR079W"; /gene_synonym="AUP1"; /db_xref="GeneID:850441"	248676..250004	3	FALSE	30248676	30250004	2
	1538	chr3_ref v2	SRB8	Gene	250202..254485	/gene="SRB8"; /locus_tag="YCR081W"; /gene_synonym="GIG1; MED12; NUT6; SSN5; YCR080W"; /db_xref="GeneID:850442"	250202..254485	3	FALSE	30250202	30254485	2
	1540	chr3_ref v2	AHC2	Gene	254714..255100	/gene="AHC2"; /locus_tag="YCR082W"; /db_xref="GeneID:850443"	254714..255100	3	FALSE	30254714	30255100	2
	1542	chr3_ref v2	TRX3	Gene	255408..255791	/gene="TRX3"; /locus_tag="YCR083W"; /db_xref="GeneID:850444"	255408..255791	3	FALSE	30255408	30255791	2
	1544	chr3_ref v2	TUP1	Gene	complement(256141..258282)	/gene="TUP1"; /locus_tag="YCR084C"; /gene_synonym="AAR1; AER2; AMM1; CRT4; CYC9; FLK1; ROX4; SFL2; UMR7"; /db_xref="GeneID:850445"	256141..258282	3	TRUE	30256141	30258282	2
	1546	chr3_ref v2	CSM1	Gene	259222..259794	/gene="CSM1"; /locus_tag="YCR086W"; /db_xref="GeneID:850447"	259222..259794	3	FALSE	30259222	30259794	2
	1548	chr3_ref v2	LUG1	Gene	complement(259836..260297)	/gene="LUG1"; /locus_tag="YCR087C-A"; /db_xref="GeneID:850449"	259836..260297	3	TRUE	30259836	30260297	2
	1550	chr3_ref v2	ABP1	Gene	260898..262676	/gene="ABP1"; /locus_tag="YCR088W"; /db_xref="GeneID:850450"	260898..262676	3	FALSE	30260898	30262676	2
	1552	chr3_ref v2	FIG2	Gene	263264..268093	/gene="FIG2"; /locus_tag="YCR089W"; /db_xref="GeneID:850451"	263264..268093	3	FALSE	30263264	30268093	2
	1554	chr3_ref v2	Gene	Gene	complement(268145..268693)	/locus_tag="YCR090C"; /db_xref="GeneID:850452"	268145..268693	3	TRUE	30268145	30268693	2
[truncated: 64,863 more rows]

## Sheet: p_values
p-cutoff				Substitutions				Indels
0.0022				WT pols	pol1-L868M	pol3-L612M	pol2-M644G	WT pols	pol1-L868M	pol3-L612M	pol2-M644G
[truncated: 29 more rows]

## Sheet: TAK266
	Selected Element	Mapping	Reference Position	Consensus Position	Variation Type	Length	Reference	Variants	Allele Variations	Frequencies	Counts	Coverage	Variant #1	Frequency of #1	Count of #1	Variant #2	Frequency of #2	Count of #2				Overlapping Annotations	Amino Acid Change	Left Flank, Reference	Right Flank, Reference	Left Flank, Consensus	Right Flank, Consensus
[truncated: 80 more rows]

[truncated: 50 more sheets: TAK258, TAK259, TAK260, TAK262, TAK076, TAK077, TAK130, TAK131, TAK132, TAK134, TAK135, TAK215, TAK279, TAK280, TAK281, TAK175, TAK216, TAK264, TAK269, TAK271 …]
